# Supplementary material for: The landscape of alternative splicing reveals novel events associated with tumorigenesis and the immune microenvironment in gastric cancer
Source: publisher site journal article supplement (doi:10.18632/aging.202393), 2021-01-10
Supplement: Supplementary file [file aging-v13i3-202393-supplementary-material-SD1.pdf]

# SUPPLEMENTARY FIGURES

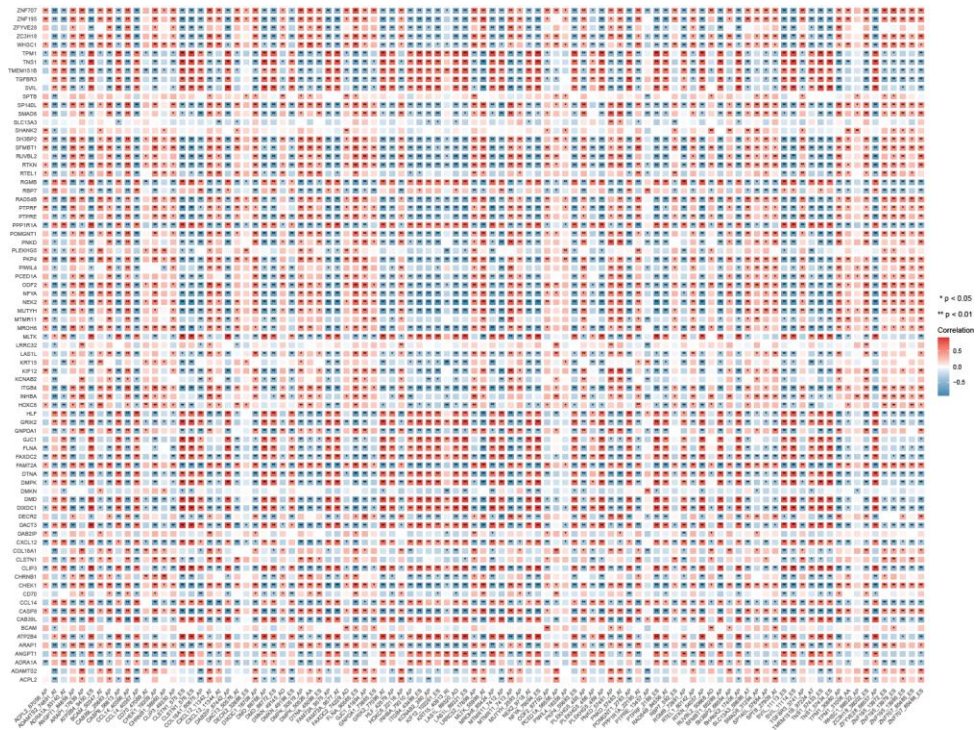

Supplementary Figure 1. Correlation heatmap of DEAS events and their parental genes.

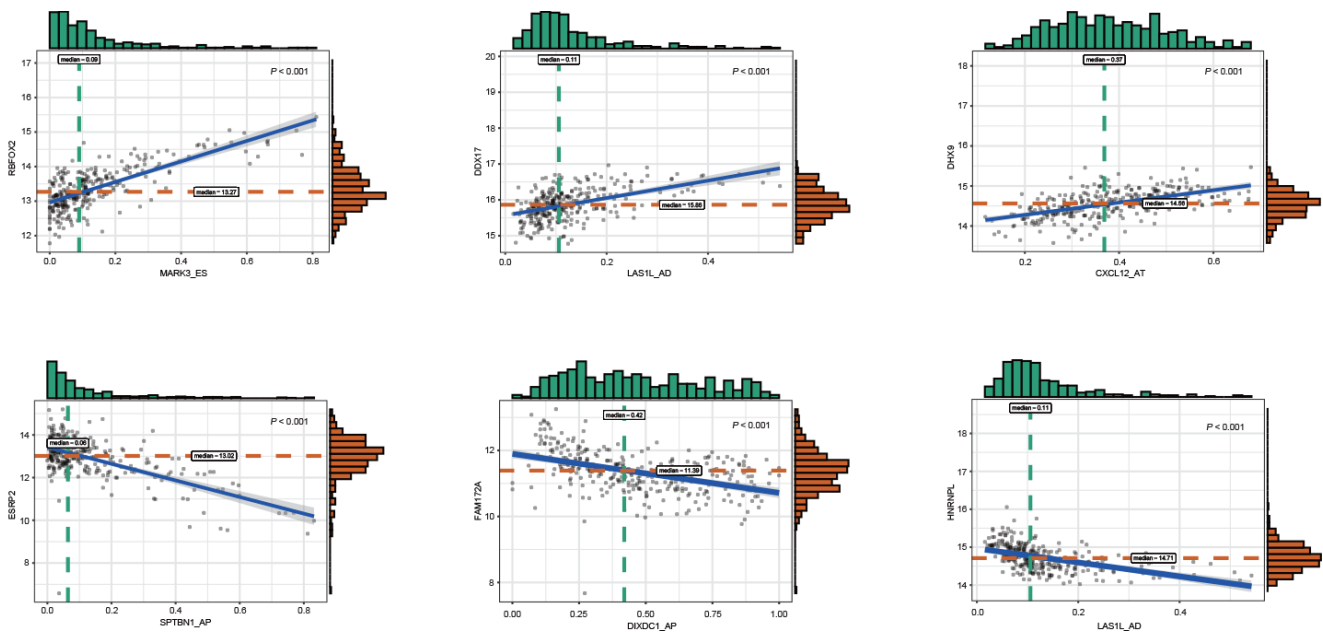

Supplementary Figure 2. Representative correlation between DEAS events and SFs.
