# Supplementary material for: The landscape of alternative splicing reveals novel events associated with tumorigenesis and the immune microenvironment in gastric cancer
Source: Aging (Albany NY). 2021 Jan 10;13(3):4317–34. doi: 10.18632/aging.202393 (PMC7906195; doi:10.18632/aging.202393)
Supplement: Supplementary Table 1 [file aging-13-202393-s002.xlsx]

## Sheet: Sheet1
Table S1. Differentially expressed AS (DEAS) events
DEAS ID	AS type	log2(fc)	Adjusted P-value
MORN1-252-AT	AT	1.0462	0.0440247
KCNAB2-360-AP	AP	-1.2325	0.0163604
PLEKHG5-465-AP	AP	1.63	0.0107596
PLEKHG5-466-AP	AP	-1.5865	0.0222443
PLEKHG5-469-AP	AP	-1.7083	0.0306345
PIK3CD-572-RI	RI	1.1738	0.0376331
CLSTN1-575-ES	ES	-1.4007	0.0306345
CLSTN1-576-ES	ES	-1.5811	0.0272408
RBP7-592-ES	ES	1.9974	0.0293597
KAZN-729-AP	AP	-1.7119	0.0189332
AGO1-1734-AP	AP	5.2562	0.0472472
C1orf122-1840-RI	RI	1.1547	0.00256429
C1orf122-1842-AD	AD	-1.1891	0.0120813
MACF1-1870-AP	AP	1.2041	0.0227645
SCMH1-2046-AP	AP	1.8806	0.0306064
PTPRF-2189-ES	ES	-3.9297	0.0348823
ST3GAL3-2299-ES	ES	1.3529	0.0361628
MUTYH-2593-AP	AP	1.0763	0.00385729
POMGNT1-2783-AP	AP	-1.431	0.0176837
DOCK7-3256-ES	ES	-1.3495	0.0295967
LEPR-3295-AT	AT	-1.0071	0.00901706
TGFBR3-3741-AP	AP	2.2258	0.0229458
PTBP2-3832-ES	ES	-1.0391	0.0189332
WNT2B-4198-AP	AP	1.4919	0.00910368
MTMR11-7412-AP	AP	-1.3733	0.0193766
MTMR11-7413-AP	AP	1.1115	0.0193766
S100A4-7713-AP	AP	2.0405	0.00651841
GPR161-8889-AP	AP	-1.0813	0.0211517
GLUL-9148-AD	AD	1.063	0.0141661
RGL1-9194-AP	AP	1.4411	0.0254059
ATP2B4-9450-ES	ES	-1.2554	0.0108598
ELK4-9560-AT	AT	1.1119	0.0442413
FAM72A-9575-AP	AP	-1.8038	0.00985533
FAM72A-9577-AT	AT	-1.2849	0.0154432
RCOR3-9711-ES	ES	1.1248	0.0256657
NEK2-9718-AT	AT	-1.8215	0.0450917
ZNF670-10509-AT	AT	2.6859	0.00462711
ANKRD16-10666-AT	AT	1.7339	0.032809
KIAA1217-10995-AP	AP	-1.4869	0.0450522
ABI1-11039-ES	ES	-1.157	0.0415549
SVIL-11113-ES	ES	-1.6686	0.00207869
SVIL-11114-ES	ES	-2.1751	0.00207869
ZNF438-11135-ES	ES	-2.5333	0.0306064
CXCL12-11342-AT	AT	1.6476	0.000163478
CXCL12-11344-AT	AT	1.6338	0.00367297
ANK3-11843-AP	AP	-3.1413	0.0463298
ARID5B-11866-AP	AP	1.2764	0.0211445
SLC25A16-11952-ES	ES	1.1979	0.033689
CDH23-12058-AT	AT	1.2339	0.0143792
PSAP-12067-AA	AA	-2.1293	0.0239953
CAMK2G-12247-ES	ES	-1.7469	0.0322918
CAMK2G-12249-ES	ES	-1.9982	0.00458208
VCL-12254-ES	ES	-1.8143	0.00225267
DNMBP-12781-AP	AP	-2.31	0.0361878
SFXN2-12977-ES	ES	1.3092	0.0269037
TACC2-13346-AD	AD	2.3446	0.0196748
PLEKHA1-13355-ES	ES	-1.7543	0.0338994
PTPRE-13457-AP	AP	-1.0569	0.0145634
BNIP3-13478-AT	AT	1.3241	0.045143
LSP1-13867-AP	AP	-3.231	0.00364762
ZNF195-13972-ES	ES	1.5074	0.00974132
ZNF195-13979-ES	ES	2.2184	0.0143838
ZNF195-13985-ES	ES	1.3254	0.0267937
TEAD1-14436-ES	ES	-1.3533	0.00633791
CD44-15143-ES	ES	1.1203	0.0179098
CTNND1-15945-ES	ES	-1.4495	0.0466835
CTNND1-15976-ES	ES	-1.2341	0.0444039
SHANK2-17406-AP	AP	-6.3952	0.0235541
ARAP1-17639-AP	AP	1.4597	0.00327168
PAAF1-17744-ES	ES	-2.9586	0.0332255
LRRC32-17898-AP	AP	1.4507	0.000798783
PIWIL4-18358-AP	AP	1.2114	0.0222443
DIXDC1-18708-AP	AP	1.0735	0.0117068
CHEK1-19309-AP	AP	1.5325	0.0179437
TIRAP-19389-ES	ES	1.0418	0.0228388
PRDM10-19464-AP	AP	1.1437	0.0349741
NTM-19520-AP	AP	-1.3253	0.0398759
RAD52-19643-ES	ES	-1.0559	0.0343037
CACNA2D4-19675-AT	AT	1.1747	0.00207869
APOLD1-20514-AP	AP	1.4704	0.0122033
C2CD5-20734-ES	ES	-2.4308	0.0450967
CCDC91-20920-ES	ES	1.1798	0.00564649
METTL20-21002-AP	AP	3.3459	0.0416145
SLC38A1-21326-ES	ES	1.726	0.00385729
SLC38A1-21327-ES	ES	1.4859	0.0193887
LETMD1-21745-AD	AD	1.3739	0.0385179
LETMD1-21747-ES	ES	1.0133	0.0272408
LETMD1-21757-ES	ES	1.5482	0.0150898
HOXC6-22116-AP	AP	1.6409	0.0135112
HOXC4-22117-AP	AP	1.9674	0.00990266
PPP1R1A-22195-AT	AT	1.8237	0.00703183
MMP19-22274-RI	RI	-1.0572	0.0289477
R3HDM2-22574-ES	ES	-1.7598	0.031451
ARHGAP9-22584-AP	AP	-1.6431	0.0392475
UNG-24277-AP	AP	1.3133	0.00367297
HVCN1-24489-AP	AP	-1.2761	0.0107596
CAB39L-25883-AP	AP	1.6975	0.00208508
SETDB2-25889-ES	ES	1.3106	0.0400598
STXBP6-27028-AP	AP	4.5532	0.00983171
RTN1-27757-AP	AP	-2.6104	0.0120993
SYNE2-27846-ES	ES	-1.3879	0.0177295
SPTB-27909-AT	AT	1.8628	0.0192933
ALDH6A1-28367-AP	AP	1.9444	0.0286952
TTC7B-28826-ES	ES	-1.1175	0.0129643
MARK3-29448-ES	ES	-1.8674	0.0471332
MARK3-29450-ES	ES	-2.1533	0.0469639
ADSSL1-29549-AP	AP	1.6789	0.0256682
AKT1-29559-AP	AP	1.059	0.0381824
GCHFR-30031-AP	AP	-2.0402	0.0228388
ZNF106-30163-AP	AP	-1.4261	0.0322918
TPM1-30980-AP	AP	1.2084	0.0303864
TPM1-31008-AA	AA	2.4938	0.0396554
SMAD6-31294-AP	AP	1.1531	0.0159726
ISLR-31676-AP	AP	2.1382	4.83439e-05
SCAMP5-31823-ES	ES	-1.0027	0.0175658
DECR2-32888-ES	ES	1.3707	0.0451472
UNKL-33077-AP	AP	1.6781	0.0420817
SYNGR3-33182-AP	AP	1.0387	0.0177045
CDIP1-33755-AP	AP	-1.6381	0.0152958
ROGDI-33857-AD	AD	1.8313	0.0209349
C16orf62-34319-AP	AP	2.3256	0.0455398
LYRM1-34403-AP	AP	1.562	0.0399733
MT1H-36492-RI	RI	-2.2357	0.045143
PHLPP2-37475-AT	AT	1.1125	0.00154743
ZC3H18-38002-ES	ES	1.1073	0.000764377
MYO1C-38307-AP	AP	1.281	0.0302991
MED11-38579-AA	AA	1.8544	0.00576719
CHRNB1-38960-AP	AP	1.7078	0.0414689
GAS7-39261-AP	AP	-1.9248	0.00350015
AKAP10-39785-ES	ES	2.4911	0.0150376
MYO18A-40038-ES	ES	-1.6629	0.0451472
CCL14-40366-AP	AP	2.1018	0.00041872
CCL14-40367-AP	AP	-1.2353	0.00041872
DUSP14-40525-AP	AP	1.6425	0.00745679
FBXL20-40638-AP	AP	1.0019	0.0228388
KRT15-40913-RI	RI	-1.0281	0.0290455
JUP-40931-AT	AT	1.8903	0.0379982
GJC1-41894-AP	AP	1.8751	0.00910505
SNX11-42174-ES	ES	1.0137	0.0461252
SPOP-42303-AP	AP	-2.0252	0.0172477
SPAG9-42494-ES	ES	-1.1193	0.0343037
HLF-42579-AP	AP	-2.1615	0.0236191
MTMR4-42681-AP	AP	1.1319	0.000591623
BCAS3-42864-AP	AP	-1.1147	0.0117068
ICAM2-43038-AP	AP	1.0236	0.0381824
MAP2K6-43187-AP	AP	1.3447	0.0433877
GRIN2C-43310-AT	AT	1.0321	0.0433877
ITGB4-43489-ES	ES	-1.9873	0.0292632
GALK1-43493-AT	AT	1.3821	0.0156066
SEPT9-43715-AP	AP	-1.3649	0.0228388
AFMID-43811-ES	ES	1.5975	0.00207869
MAFG-44239-AP	AP	-1.1083	0.00365686
SOGA2-44582-ES	ES	-1.7075	0.00231593
DTNA-45099-ES	ES	1.3711	0.0192933
PQLC1-46257-ES	ES	-1.5438	0.0411146
CD70-47069-AT	AT	1.1296	0.021076
MAP2K7-47194-ES	ES	-1.0135	0.0409579
C19orf82-47381-ES	ES	1.9977	0.0272408
ZNF846-47405-ES	ES	1.1721	0.0436958
SMIM7-48183-AT	AT	1.189	0.020904
SMIM7-48195-ES	ES	1.8953	0.0190415
RPL18A-48384-ES	ES	1.6463	0.00218732
DMKN-49145-AD	AD	1.0147	0.0181278
DMKN-49198-ES	ES	-1.1683	0.0108598
CLIP3-49330-AP	AP	2.6312	0.0265531
ZFP30-49559-AT	AT	-2.0892	0.00847194
SIRT2-49713-AA	AA	3.0953	0.0428629
BCAM-50347-AT	AT	1.3417	0.00847194
DMPK-50519-AP	AP	1.4431	0.00946335
DMPK-50526-AA	AA	2.0773	0.00932243
DACT3-50576-AT	AT	1.5749	0.0463298
RUVBL2-50868-AD	AD	1.4014	0.0296278
ATF5-51134-AP	AP	1.1128	0.00455405
ZNF160-51649-AP	AP	1.1367	0.0310713
DNMT3A-52854-AP	AP	2.0425	0.00736682
MTA3-53364-AP	AP	1.677	0.0463298
SPTBN1-53576-AP	AP	-1.9945	0.0258393
PCYOX1-53879-AP	AP	1.0338	0.0422563
DYSF-53935-AP	AP	1.5397	0.00745679
DYSF-53937-ES	ES	-1.8611	0.00383937
RTKN-54057-AP	AP	-2.2376	0.0330303
DOK1-54113-AP	AP	1.5527	0.042316
GNLY-54377-ES	ES	-1.0096	0.0409702
ARHGEF4-55356-AT	AT	1.7283	0.0409702
PKP4-55683-ES	ES	-2.2538	0.0179437
MLTK-55999-AT	AT	1.429	0.00367297
CHN1-56046-AP	AP	-1.45	0.00114848
SSFA2-56438-AP	AP	1.1389	0.0417793
CASP8-56813-AP	AP	-1.0967	0.0163604
PLEKHM3-57206-AT	AT	1.9106	0.0466934
TNS1-57433-ES	ES	-2.3083	0.00462711
TNS1-57434-ES	ES	-1.1022	0.0125926
PNKD-57461-AP	AP	1.3431	0.00207869
PNKD-57463-AT	AT	1.6362	0.000796132
SP140L-57884-AP	AP	3.2926	0.0283805
COL6A3-58104-ES	ES	2.0457	0.000437842
LRRFIP1-58133-ES	ES	-1.9903	0.0451472
LRRFIP1-58137-ES	ES	-1.4927	0.0338166
ANKMY1-58247-AP	AP	1.2057	0.0397113
NSFL1C-58506-ES	ES	-2.2505	0.0381824
PCED1A-58556-AP	AP	1.3728	0.0133577
MACROD2-58715-AP	AP	1.3019	0.0175658
EPB41L1-59266-AP	AP	1.2521	0.0269037
SLC13A3-59696-AT	AT	1.7232	0.0256682
TMEM189-59770-AP	AP	-2.7665	0.0440572
NFATC2-59798-AP	AP	-1.5837	0.0149985
TSHZ2-59816-AP	AP	2.8784	0.0340884
RPS21-60075-AA	AA	1.3679	0.00231593
RPS21-60076-AD	AD	1.1606	0.00458208
RTEL1-60142-AP	AP	1.0515	0.0473795
COL18A1-60875-AP	AP	-1.1857	0.00580003
MICAL3-61016-ES	ES	-2.6701	0.021061
MTMR3-61690-ES	ES	-1.4063	0.0354867
RBFOX2-61984-ES	ES	-2.8679	0.0290192
TMEM184B-62226-ES	ES	-2.2124	0.0451472
RPL32-63468-RI	RI	1.2626	0.000796132
FBLN2-63511-ES	ES	-1.5224	4.83439e-05
BTD-63615-AP	AP	1.1556	0.0350107
RARB-63743-AP	AP	-3.1322	0.00580003
SLC4A7-63783-ES	ES	-1.7715	0.0189056
PLCD1-64009-AP	AP	-1.0618	0.0359328
TRAK1-64265-AP	AP	-3.6325	0.0174773
SFMBT1-65289-AP	AP	-1.5192	0.0165052
C3orf67-65477-AT	AT	-1.2145	0.0463298
ST3GAL6-65791-AP	AP	1.1138	0.0252418
ACPL2-67056-AP	AP	1.6912	0.0222443
TNIK-67632-ES	ES	-2.1674	0.0360497
EIF4A2-68054-ES	ES	1.0943	0.0307092
IDUA-68439-AP	AP	1.2945	0.00231593
WHSC1-68522-AP	AP	1.6742	0.0467672
ZFYVE28-68557-AP	AP	-1.7471	0.0216546
SH3BP2-68594-AP	AP	1.259	0.0239841
CPEB2-68798-ES	ES	-1.0191	0.0360497
PCDH7-68993-AT	AT	1.4429	0.021076
TBC1D1-69017-ES	ES	-2.5604	0.00322621
LIMCH1-69112-AP	AP	-1.1594	0.031647
SCD5-69715-AT	AT	1.3941	0.0439755
CAMK2D-70416-ES	ES	-4.2954	0.0323424
KIAA1109-70519-ES	ES	-1.076	0.0360497
NDUFC1-70617-AP	AP	-1.0659	0.0023028
RPS3A-70824-ES	ES	2.2617	0.00616753
PDE8B-72564-AP	AP	-1.3988	0.00113009
RGMB-72881-AP	AP	-1.145	0.0183687
TRIM36-73017-AP	AP	-1.7558	0.0442413
PHF15-73400-AP	AP	-1.4898	0.0256569
GNPDA1-73865-ES	ES	1.1004	0.0242566
FAXDC2-74229-AD	AD	1.5606	0.0400598
MRPL22-74296-ES	ES	1.1103	0.049404
ERGIC1-74563-RI	RI	1.0904	0.0076539
PDLIM7-74784-ES	ES	1.1656	0.0332255
ADAMTS2-74891-AT	AT	-1.9152	0.000163478
CDYL-75229-AP	AP	1.3534	0.0276498
NFYA-76094-ES	ES	-1.5325	0.0483353
EEF1A1-76758-RI	RI	1.3665	0.00390944
COL12A1-76773-ES	ES	1.3928	0.0023028
GRIK2-77096-AT	AT	-1.9047	0.025131
PKIB-77376-AP	AP	1.3133	0.0248626
EPB41L2-77596-ES	ES	-1.0293	0.00231593
AIG1-77975-AA	AA	1.0372	0.0258393
ESR1-78166-AT	AT	1.341	0.0438954
MLLT4-78456-ES	ES	-1.0568	0.032809
PRKAR1B-78505-AP	AP	1.3776	0.0021536
TMEM184A-78584-AP	AP	-1.333	0.0444039
WIPI2-78656-ES	ES	1.0725	0.00267734
RNF216-78674-AA	AA	1.3521	0.0410284
HDAC9-78885-AP	AP	-1.5076	0.0360497
HDAC9-78886-AP	AP	1.7029	0.016893
CHN2-79081-AP	AP	-1.9314	0.00113009
CHN2-79083-AP	AP	1.2418	0.00288573
INHBA-79310-AP	AP	-1.175	0.00423434
POLR2J3-81107-AT	AT	1.0193	0.00699181
SRPK2-81284-ES	ES	1.292	0.0486725
CDHR3-81315-AP	AP	-2.1833	0.0216035
SLC4A2-82328-AP	AP	1.4256	0.0288143
NAT1-82857-ES	ES	1.2627	0.0385151
TNFRSF10C-83065-AT	AT	2.1055	0.0292872
ADRA1A-83140-AT	AT	-1.7573	0.0115491
TACC1-83437-AP	AP	-1.0133	0.0324079
KAT6A-83554-ES	ES	1.0106	0.0359021
DECR1-84411-ES	ES	1.9577	0.0193737
RAD54B-84556-AT	AT	-1.4367	0.0108598
ANKRD46-84712-AD	AD	1.0841	0.0153074
ANGPT1-84859-AP	AP	1.0605	0.0145916
MROH6-85424-AP	AP	-1.7807	0.0293039
ZNF707-85485-ES	ES	1.664	0.0291223
ZNF707-85488-ES	ES	1.0455	0.00704812
IL11RA-86209-AP	AP	1.1786	0.0380362
CNTNAP3B-86483-AT	AT	1.1368	0.0384904
ZNF483-87210-AT	AT	-1.1876	0.0381824
TNC-87352-ES	ES	1.8756	0.0372015
TNC-87357-ES	ES	1.5017	0.00305677
ASTN2-87367-AP	AP	-1.8147	0.0111218
DAB2IP-87442-AP	AP	-1.6698	0.0461252
DENND1A-87517-ES	ES	-1.3411	0.0438954
ODF2-87750-AP	AP	2.8219	0.048965
SPTAN1-87772-ES	ES	-1.0278	0.0154326
CRAT-87828-ES	ES	-1.4237	0.0233778
FNBP1-87887-ES	ES	-1.2021	0.0214659
EGFL7-88188-AP	AP	2.4507	0.0105055
CXorf23-88651-ES	ES	1.0102	0.0392077
DMD-88768-AP	AP	-1.4451	0.0330303
DMD-88772-ES	ES	-1.2197	0.0110748
LAS1L-89320-AD	AD	-1.5697	0.0143008
LAS1L-89321-ES	ES	-1.9281	0.0256682
CXorf40A-90312-RI	RI	1.1572	0.0242964
MTMR1-90356-ES	ES	-1.4552	0.0439617
FLNA-90565-ES	ES	1.3404	0.000591623
MICAL3-96068-ES	ES	-1.5457	0.0322918
TMEM151B-97224-AT	AT	-1.4337	0.0152345
CD99-98274-ES	ES	-1.0419	0.044755
KIF12-102261-ES	ES	-2.7065	0.0187936
CCDC53-106010-ME	ME	-2.0229	0.00365686
RPS6-214603-AD	AD	1.1382	0.0068539
EEF1A1-319302-ES	ES	1.0569	0.00141384
