# Supplementary material for: The landscape of alternative splicing reveals novel events associated with tumorigenesis and the immune microenvironment in gastric cancer
Source: Aging (Albany NY). 2021 Jan 10;13(3):4317–34. doi: 10.18632/aging.202393 (PMC7906195; doi:10.18632/aging.202393)
Supplement: Supplementary Table 2 [file aging-13-202393-s003.xlsx]

## Sheet: Sheet1
Table S2. Differently expressed genes (DEGs) of the 280 parent genes
Gene ID	log2(fc)	Adjusted P-value
NFYA	1.0058	0.00167403
LAS1L	1.15798	0.000625829
ZNF195	1.31062	0.000728283
MTMR11	1.45972	0.00078753
ATP2B4	-1.23234	1.21038e-05
CASP8	1.25244	0.000658975
KCNAB2	1.79279	0.000127032
TGFBR3	-1.08008	1.88696e-05
SPTB	1.52682	0.00884786
TNS1	-1.59794	4.85111e-06
POMGNT1	1.06402	0.00202516
ADAMTS2	2.89477	1.03384e-10
SH3BP2	1.31832	3.22254e-05
MLTK	-1.37864	7.83626e-06
CAB39L	-1.38331	1.03701e-08
DMPK	-1.38054	2.27971e-06
CLIP3	-1.61747	3.12447e-07
CXCL12	-1.05376	9.11974e-05
HLF	-2.80219	8.20144e-10
WHSC1	1.76962	1.84717e-07
GNPDA1	1.14707	0.000387702
RTKN	1.84114	9.07683e-08
NEK2	2.4981	1.89765e-05
ADRA1A	-1.56024	8.44286e-05
INHBA	3.59247	1.03384e-10
CD70	3.05184	4.86713e-05
PNKD	1.42085	0.00439185
PTPRE	1.40296	0.000174841
ITGB4	1.74174	1.38111e-05
PCED1A	1.05109	0.0129412
MUTYH	1.17206	0.00168712
PIWIL4	1.34172	0.00439185
DTNA	-1.51413	6.39873e-08
PPP1R1A	-3.71775	1.2332e-07
ODF2	1.51907	8.67436e-09
DAB2IP	1.09181	0.00840292
KIF12	2.57806	0.00308065
LRRC32	1.21506	0.0133326
SMAD6	1.52577	0.000810796
TPM1	-1.8439	1.03701e-08
PTPRF	1.04723	0.0268019
PKP4	1.28309	7.64932e-05
CHEK1	1.72523	1.48199e-06
DIXDC1	-1.65571	6.96762e-09
ANGPT1	-1.23435	6.20477e-06
ACPL2	1.23881	0.00168489
SLC13A3	1.80655	0.0052829
ZC3H18	1.05343	0.000157439
ZFYVE28	1.00298	0.0394672
DMKN	-1.19812	0.0374904
SHANK2	1.32714	0.00957344
RBP7	-1.29643	0.000296388
SFMBT1	1.37505	2.46243e-05
GRIK2	-2.25514	2.89042e-08
CHRNB1	1.28088	0.00781714
FAXDC2	-1.23954	1.2193e-05
KRT15	-2.38739	0.0154652
CLSTN1	1.11943	0.00483576
PLEKHG5	1.08193	0.0314143
RGMB	-1.26157	9.87528e-09
TMEM151B	-1.44476	6.20477e-06
ZNF707	1.50359	5.4305e-07
COL18A1	1.66592	2.0636e-06
GJC1	-1.35572	2.94433e-05
RUVBL2	1.04253	0.000737387
SP140L	1.83318	5.56864e-08
ARAP1	1.07887	0.000314774
BCAM	1.54044	0.00194297
FAM72A	2.24489	5.11851e-07
FLNA	-1.5656	0.000160666
RAD54B	1.88109	1.32417e-05
SVIL	-1.68774	5.4305e-07
DACT3	-1.57178	1.21366e-05
HOXC6	2.09946	0.00207429
DMD	-1.85595	6.96762e-09
MROH6	1.76607	0.00168489
DECR2	1.40912	0.00369865
RTEL1	1.18421	0.00515916
CCL14	-1.29666	8.44286e-05
