# Supplementary material for: The landscape of alternative splicing reveals novel events associated with tumorigenesis and the immune microenvironment in gastric cancer
Source: Aging (Albany NY). 2021 Jan 10;13(3):4317–34. doi: 10.18632/aging.202393 (PMC7906195; doi:10.18632/aging.202393)
Supplement: Supplementary Table 3 [file aging-13-202393-s004.xlsx]

## Sheet: Sheet1
Table S3. Spearman correlation analysis of DEGs and DEAS events
DEG ID	DEAS ID	Cor	Adjusted P-value	AS type
KCNAB2	KCNAB2-360-AP	-0.431664	0.00680864	AP
CLSTN1	CLSTN1-576-ES	-0.426786	0.0075365	ES
RBP7	RBP7-592-ES	-0.40302	0.0121138	ES
PTPRF	PTPRF-2189-ES	-0.770731	1.51121e-08	ES
MUTYH	MUTYH-2593-AP	0.607309	5.27532e-05	AP
POMGNT1	POMGNT1-2783-AP	-0.819788	3.06296e-10	AP
TGFBR3	TGFBR3-3741-AP	-0.561021	0.000248299	AP
MTMR11	MTMR11-7412-AP	-0.737428	1.2844e-07	AP
MTMR11	MTMR11-7413-AP	0.737428	1.2844e-07	AP
ATP2B4	ATP2B4-9450-ES	0.780736	7.40342e-09	ES
FAM72A	FAM72A-9575-AP	-0.745615	7.82463e-08	AP
FAM72A	FAM72A-9577-AT	-0.78373	5.93675e-09	AT
NEK2	NEK2-9718-AT	-0.901799	1.11211e-14	AT
SVIL	SVIL-11113-ES	0.668106	4.57843e-06	ES
SVIL	SVIL-11114-ES	0.824093	2.0582e-10	ES
CXCL12	CXCL12-11342-AT	-0.54095	0.000453882	AT
CXCL12	CXCL12-11344-AT	-0.55386	0.000309279	AT
ZNF195	ZNF195-13972-ES	0.554962	0.000299097	ES
ZNF195	ZNF195-13979-ES	0.574418	0.000162398	ES
ZNF195	ZNF195-13985-ES	0.5693	0.000191412	ES
ARAP1	ARAP1-17639-AP	0.617272	3.65958e-05	AP
DIXDC1	DIXDC1-18708-AP	-0.614912	3.99526e-05	AP
CHEK1	CHEK1-19309-AP	0.671995	3.84177e-06	AP
PPP1R1A	PPP1R1A-22195-AT	-0.780653	7.44843e-09	AT
CAB39L	CAB39L-25883-AP	-0.626757	2.55339e-05	AP
TPM1	TPM1-30980-AP	-0.686644	1.937e-06	AP
SMAD6	SMAD6-31294-AP	0.505281	0.00121357	AP
ZC3H18	ZC3H18-38002-ES	0.638231	1.62543e-05	ES
CHRNB1	CHRNB1-38960-AP	0.766522	2.0189e-08	AP
CCL14	CCL14-40366-AP	-0.680455	2.5991e-06	AP
CCL14	CCL14-40367-AP	0.683505	2.25053e-06	AP
KRT15	KRT15-40913-RI	-0.828524	1.35158e-10	RI
HLF	HLF-42579-AP	0.621401	3.13343e-05	AP
ITGB4	ITGB4-43489-ES	-0.787351	4.5243e-09	ES
DTNA	DTNA-45099-ES	-0.633244	1.98245e-05	ES
CLIP3	CLIP3-49330-AP	-0.54908	0.000357121	AP
DMPK	DMPK-50519-AP	-0.515833	0.000917364	AP
DMPK	DMPK-50526-AA	-0.462606	0.00345182	AA
DACT3	DACT3-50576-AT	-0.712555	5.21267e-07	AT
RTKN	RTKN-54057-AP	-0.722038	3.11e-07	AP
PKP4	PKP4-55683-ES	-0.644981	1.23544e-05	ES
MLTK	MLTK-55999-AT	-0.75405	4.60322e-08	AT
CASP8	CASP8-56813-AP	-0.711523	5.50715e-07	AP
TNS1	TNS1-57433-ES	0.831703	9.92265e-11	ES
TNS1	TNS1-57434-ES	0.866254	2.13757e-12	ES
PNKD	PNKD-57461-AP	0.787216	4.57102e-09	AP
PNKD	PNKD-57463-AT	0.793887	2.73372e-09	AT
SP140L	SP140L-57884-AP	0.638017	1.63946e-05	AP
SFMBT1	SFMBT1-65289-AP	-0.61443	4.06719e-05	AP
ZFYVE28	ZFYVE28-68557-AP	-0.654608	8.25601e-06	AP
RGMB	RGMB-72881-AP	0.848744	1.68378e-11	AP
ADAMTS2	ADAMTS2-74891-AT	-0.661329	6.17854e-06	AT
NFYA	NFYA-76094-ES	-0.741585	1.00097e-07	ES
GRIK2	GRIK2-77096-AT	0.864107	2.79543e-12	AT
INHBA	INHBA-79310-AP	-0.560241	0.000254371	AP
ADRA1A	ADRA1A-83140-AT	0.671692	3.89486e-06	AT
RAD54B	RAD54B-84556-AT	-0.723384	2.8853e-07	AT
ANGPT1	ANGPT1-84859-AP	-0.58922	9.93924e-05	AP
MROH6	MROH6-85424-AP	-0.887265	1.17959e-13	AP
ZNF707	ZNF707-85485-ES	0.541082	0.000452136	ES
ZNF707	ZNF707-85488-ES	0.577055	0.000149055	ES
ODF2	ODF2-87750-AP	0.575656	0.000156008	AP
DMD	DMD-88768-AP	0.775431	1.08571e-08	AP
DMD	DMD-88772-ES	0.731155	1.85518e-07	ES
LAS1L	LAS1L-89320-AD	-0.522569	0.000763631	AD
LAS1L	LAS1L-89321-ES	-0.43733	0.00603989	ES
FLNA	FLNA-90565-ES	-0.480378	0.00226985	ES
TMEM151B	TMEM151B-97224-AT	0.781537	6.98114e-09	AT
KIF12	KIF12-102261-ES	-0.724346	2.73399e-07	ES
