# Supplementary material for: The landscape of alternative splicing reveals novel events associated with tumorigenesis and the immune microenvironment in gastric cancer
Source: Aging (Albany NY). 2021 Jan 10;13(3):4317–34. doi: 10.18632/aging.202393 (PMC7906195; doi:10.18632/aging.202393)
Supplement: Supplementary Table 4 [file aging-13-202393-s005.xlsx]

## Sheet: Sheet1
Table S4. GO enrichment analysis of DEAS events
GO term	GO ID	Description	GeneRatio	BgRatio	Adjusted P-value	gene ID
BP	GO:0034329	cell junction assembly	14/256	241/18670	0.0191444	VCL/LIMCH1/TNS1/MACF1/CDHR3/AFDN/ITGB4/BCAS3/PKP4/JUP/GJC1/FLNA/MYO1C/CTNND1
BP	GO:1990778	protein localization to cell periphery	15/256	311/18670	0.0191444	EPB41L2/CLIP3/C2CD5/RTKN/SPTBN1/MACF1/AFDN/AKT1/ANK3/TNIK/GRIN2C/TTC7B/CLSTN1/JUP/FLNA
BP	GO:0016054	organic acid catabolic process	14/256	275/18670	0.0191444	CD44/ATP2B4/CRAT/DECR1/GNPDA1/PCYOX1/ALDH6A1/IDUA/GLUL/ETFBKMT/AKT1/AIG1/AFMID/DECR2
BP	GO:0046395	carboxylic acid catabolic process	14/256	275/18670	0.0191444	CD44/ATP2B4/CRAT/DECR1/GNPDA1/PCYOX1/ALDH6A1/IDUA/GLUL/ETFBKMT/AKT1/AIG1/AFMID/DECR2
BP	GO:0006941	striated muscle contraction	11/256	174/18670	0.0191444	DMPK/MAP2K6/ADRA1A/DTNA/TPM1/CAMK2D/CHRNB1/JUP/GJC1/FLNA/DMD
BP	GO:0021537	telencephalon development	13/256	251/18670	0.0235592	PHLPP2/SYNE2/ATP2B4/RARB/CXCL12/INHBA/DAB2IP/TACC2/TACC1/DIXDC1/ATF5/BNIP3/FLNA
BP	GO:0034330	cell junction organization	14/256	290/18670	0.0235592	VCL/LIMCH1/TNS1/MACF1/CDHR3/AFDN/ITGB4/BCAS3/PKP4/JUP/GJC1/FLNA/MYO1C/CTNND1
BP	GO:1904355	positive regulation of telomere capping	4/256	17/18670	0.0292575	MAP2K7/NEK2/PKIB/RTEL1
CC	GO:0031252	cell leading edge	18/270	403/19717	0.00344455	CD44/SYNE2/PLEKHA1/C2CD5/SPTBN1/MACF1/ITGB4/DYSF/ARHGEF4/ABI1/TPM1/BCAS3/TIRAP/EEF1A1/PLEKHG5/PDLIM7/MYO1C/CTNND1
CC	GO:0031256	leading edge membrane	11/270	170/19717	0.00344455	CD44/SYNE2/PLEKHA1/C2CD5/SPTBN1/MACF1/ARHGEF4/TPM1/TIRAP/EEF1A1/MYO1C
CC	GO:0005938	cell cortex	15/270	308/19717	0.00344455	SPTB/EPB41L2/C2CD5/RTKN/SPTBN1/ASTN2/EEF1A1/STXBP6/TRAK1/SEPTIN9/FNBP1/FLNA/SPTAN1/CTNND1/MICAL3
CC	GO:0032587	ruffle membrane	8/270	94/19717	0.00389381	PLEKHA1/C2CD5/MACF1/ARHGEF4/TPM1/TIRAP/EEF1A1/MYO1C
CC	GO:0044449	contractile fiber part	12/270	221/19717	0.00389381	VCL/SYNE2/ATP2B4/SPTBN1/ADRA1A/TPM1/ANK3/JUP/PDLIM7/FLNA/SVIL/DMD
CC	GO:0030055	cell-substrate junction	17/270	412/19717	0.00389381	CD99/CD44/VCL/TNC/SYNE2/TNS1/EPB41L2/DOCK7/ITGB4/RPS3A/DIXDC1/SLC4A2/JUP/PDLIM7/FLNA/SVIL/DMD
CC	GO:0030016	myofibril	12/270	224/19717	0.00389381	VCL/SYNE2/ATP2B4/SPTBN1/ADRA1A/TPM1/ANK3/JUP/PDLIM7/FLNA/SVIL/DMD
CC	GO:0031253	cell projection membrane	15/270	345/19717	0.00435878	CD44/PHLPP2/SYNE2/PLEKHA1/C2CD5/SPTBN1/MACF1/ARHGEF4/TPM1/GPR161/TIRAP/EEF1A1/SHANK2/MYO1C/DMD
CC	GO:0043292	contractile fiber	12/270	234/19717	0.00435878	VCL/SYNE2/ATP2B4/SPTBN1/ADRA1A/TPM1/ANK3/JUP/PDLIM7/FLNA/SVIL/DMD
CC	GO:0042383	sarcolemma	9/270	136/19717	0.00435878	VCL/ATP2B4/ADRA1A/DTNA/DYSF/CAMK2D/ANK3/COL6A3/DMD
CC	GO:0043034	costamere	4/270	19/19717	0.00435878	VCL/ANK3/SVIL/DMD
CC	GO:0005925	focal adhesion	16/270	405/19717	0.00555558	CD99/CD44/VCL/TNC/SYNE2/TNS1/EPB41L2/DOCK7/ITGB4/RPS3A/DIXDC1/SLC4A2/JUP/PDLIM7/FLNA/SVIL
CC	GO:0005924	cell-substrate adherens junction	16/270	408/19717	0.00557666	CD99/CD44/VCL/TNC/SYNE2/TNS1/EPB41L2/DOCK7/ITGB4/RPS3A/DIXDC1/SLC4A2/JUP/PDLIM7/FLNA/SVIL
CC	GO:0005913	cell-cell adherens junction	8/270	117/19717	0.0063407	VCL/CDHR3/AFDN/PKP4/STXBP6/JUP/PDLIM7/CTNND1
CC	GO:0044448	cell cortex part	10/270	184/19717	0.00656186	SPTB/EPB41L2/RTKN/SPTBN1/EEF1A1/STXBP6/SEPTIN9/FLNA/SPTAN1/CTNND1
CC	GO:0044291	cell-cell contact zone	6/270	71/19717	0.0112111	VCL/AFDN/PKP4/ANK3/JUP/GJC1
CC	GO:0030018	Z disc	8/270	132/19717	0.0118281	SYNE2/ATP2B4/ADRA1A/ANK3/JUP/PDLIM7/FLNA/DMD
CC	GO:0030017	sarcomere	10/270	204/19717	0.0123987	SYNE2/ATP2B4/SPTBN1/ADRA1A/TPM1/ANK3/JUP/PDLIM7/FLNA/DMD
CC	GO:0001726	ruffle	9/270	172/19717	0.0131267	PLEKHA1/C2CD5/MACF1/ARHGEF4/TPM1/TIRAP/EEF1A1/PDLIM7/MYO1C
CC	GO:0005911	cell-cell junction	16/270	459/19717	0.0131267	VCL/SIRT2/DNMBP/CDHR3/AFDN/AKT1/PKP4/ANK3/STXBP6/PLEKHG5/JUP/GJC1/KAZN/PDLIM7/FLNA/CTNND1
CC	GO:0030496	midbody	9/270	173/19717	0.0131267	SIRT2/LYRM1/NEK2/PKP4/TACC1/MTCL1/SVIL/CTNND1/MICAL3
CC	GO:0031674	I band	8/270	143/19717	0.0155073	SYNE2/ATP2B4/ADRA1A/ANK3/JUP/PDLIM7/FLNA/DMD
CC	GO:0016328	lateral plasma membrane	5/270	57/19717	0.0193053	ANK3/MTCL1/JUP/MYO1C/DMD
CC	GO:0030863	cortical cytoskeleton	7/270	116/19717	0.0193053	SPTB/EPB41L2/RTKN/SPTBN1/EEF1A1/FLNA/SPTAN1
CC	GO:0030864	cortical actin cytoskeleton	6/270	90/19717	0.025138	SPTB/EPB41L2/RTKN/SPTBN1/EEF1A1/SPTAN1
CC	GO:0033017	sarcoplasmic reticulum membrane	4/270	39/19717	0.031569	SYNE2/DMPK/CAMK2D/CAMK2G
CC	GO:0098858	actin-based cell projection	9/270	208/19717	0.0368079	CD44/SLC4A7/SYNE2/CDH23/ICAM2/ABI1/ANGPT1/MYO1C/DMD
CC	GO:0016529	sarcoplasmic reticulum	5/270	71/19717	0.0429978	SYNE2/DMPK/CAMK2D/CAMK2G/ANK3
CC	GO:0005844	polysome	5/270	72/19717	0.0429978	AGO1/RPL18A/RPS6/RPL32/RPS21
CC	GO:0099572	postsynaptic specialization	12/270	348/19717	0.0429978	KCNAB2/SPTBN1/ABI1/PKP4/TNIK/GRIN2C/SHANK2/GRIK2/CHRNB1/CLSTN1/BNIP3/CTNND1
CC	GO:0098978	glutamatergic synapse	12/270	349/19717	0.0429978	RNF216/ATP2B4/FBXL20/SPTBN1/ADRA1A/TNIK/GRIN2C/GRIK2/CLSTN1/PRKAR1B/FLNA/CTNND1
CC	GO:0098793	presynapse	15/270	491/19717	0.0429978	ATP2B4/ROGDI/KCNAB2/DNMBP/FBXL20/DENND1A/ADRA1A/SYNGR3/GLUL/KIAA1109/TNIK/GRIK2/PLEKHG5/CTNND1/SCAMP5
CC	GO:0098984	neuron to neuron synapse	12/270	350/19717	0.0429978	KCNAB2/SPTBN1/ABI1/PKP4/TNIK/GRIN2C/SHANK2/GRIK2/CLSTN1/BNIP3/PRKAR1B/CTNND1
MF	GO:0003779	actin binding	25/262	431/17697	3.37726e-06	GAS7/VCL/SYNE2/LIMCH1/SPTB/TNS1/EPB41L2/EPB41L1/SPTBN1/MACF1/AFDN/LSP1/ITPRID2/TPM1/DIXDC1/ADSS1/S100A4/MYO18A/PDLIM7/FLNA/SVIL/SPTAN1/MYO1C/DMD/MICAL3
MF	GO:1901981	phosphatidylinositol phosphate binding	12/262	161/17697	0.00132094	SNX11/PLEKHA1/DENND1A/ARHGAP9/DAB2IP/AKT1/TIRAP/WIPI2/ZFYVE28/STXBP6/ARAP1/PLCD1
MF	GO:0045296	cadherin binding	16/262	331/17697	0.00528523	VCL/SPTBN1/LRRFIP1/MACF1/CDHR3/AFDN/ABI1/DAB2IP/PKP4/ANK3/STXBP6/JUP/SEPTIN9/FLNA/SPTAN1/CTNND1
MF	GO:0051015	actin filament binding	12/262	198/17697	0.00528523	GAS7/SYNE2/SPTB/MACF1/AFDN/ITPRID2/TPM1/ADSS1/MYO18A/FLNA/SVIL/MYO1C
MF	GO:0050839	cell adhesion molecule binding	20/262	499/17697	0.00593136	VCL/CXCL12/ICAM2/SPTBN1/LRRFIP1/MACF1/CDHR3/AFDN/ITGB4/ABI1/DAB2IP/PTPRF/PKP4/ANK3/STXBP6/JUP/SEPTIN9/FLNA/SPTAN1/CTNND1
MF	GO:0005543	phospholipid binding	17/262	427/17697	0.0193146	SNX11/NSFL1C/PLEKHA1/C2CD5/SPTBN1/DENND1A/ARHGAP9/DYSF/DAB2IP/AKT1/TIRAP/WIPI2/ZFYVE28/STXBP6/ARAP1/PLCD1/PSAP
MF	GO:0035091	phosphatidylinositol binding	12/262	245/17697	0.022553	SNX11/PLEKHA1/DENND1A/ARHGAP9/DAB2IP/AKT1/TIRAP/WIPI2/ZFYVE28/STXBP6/ARAP1/PLCD1
