# Supplementary material for: The landscape of alternative splicing reveals novel events associated with tumorigenesis and the immune microenvironment in gastric cancer
Source: Aging (Albany NY). 2021 Jan 10;13(3):4317–34. doi: 10.18632/aging.202393 (PMC7906195; doi:10.18632/aging.202393)
Supplement: Supplementary Table 6 [file aging-13-202393-s007.xlsx]

## Sheet: Sheet1
Table S6. GO GSEA between tumor and normal samples
GO term	GO ID	Description	enrichmentScore	NES	Adjusted P-value	gene ID
BP	GO:0007135	meiosis II	0.853379	1.89916	0.0124613	MEIKIN/BUB1/BUB1B/SGO2/HORMAD1/MASTL
BP	GO:0061983	meiosis II cell cycle process	0.853379	1.89916	0.0124613	MEIKIN/BUB1/BUB1B/SGO2/HORMAD1/MASTL
BP	GO:0000727	double-strand break repair via break-induced replication	0.843769	1.92187	0.00951053	GINS4/CDC45/MCM4/MCM2/MCM7/GINS2/CDC7/MCM3/MCM5/MCM6
CC	GO:0000778	condensed nuclear chromosome kinetochore	0.821619	2.033	0.00952918	BUB1/NUF2/BUB1B/PLK1/CENPA/NDC80/CENPO/CCNB1/CENPK/DSN1/REC8
CC	GO:0000940	condensed chromosome outer kinetochore	0.813472	1.97974	0.00951053	CENPF/BUB1/SKA3/BUB1B/PLK1/SKA1/NDC80/CCNB1/SPDL1
CC	GO:0042555	MCM complex	0.803831	1.88049	0.0168428	TONSL/MCM4/MCM2/MMS22L/MCM8/MCM7/MCM3/MCMDC2/MCM5/MCM6
BP	GO:2001054	negative regulation of mesenchymal cell apoptotic process	0.79441	1.76792	0.0379897	PAX2/PAX8/SOX9/HNF1B
CC	GO:0005583	fibrillar collagen trimer	0.78961	1.79851	0.0311252	COL11A1/COL1A1/COL3A1/COL1A2/COL5A2/COL27A1/COL5A1/COL5A3/COL2A1
CC	GO:0098643	banded collagen fibril	0.78961	1.79851	0.0311252	COL11A1/COL1A1/COL3A1/COL1A2/COL5A2/COL27A1/COL5A1/COL5A3/COL2A1
MF	GO:0015347	sodium-independent organic anion transmembrane transporter activity	0.783304	1.97059	0.00952918	SLCO1B3/SLCO1B1/SLC22A11/SLCO1A2/SLCO1B7/SLCO6A1/SLCO4A1/SLC22A6
CC	GO:0033391	chromatoid body	0.76892	1.84286	0.0187596	PIWIL1/TDRD5/MAEL/NSUN2/TDRD1/PIWIL2/TDRD6
BP	GO:2001053	regulation of mesenchymal cell apoptotic process	0.768743	1.79841	0.0277123	PAX2/PAX8/SOX9/HNF1B/MSX2/TBX1/MSX1
BP	GO:0043252	sodium-independent organic anion transport	0.767529	1.9309	0.0124613	SLCO1B3/SLCO1B1/SLCO1A2/SLCO1B7/SLCO6A1/SLCO4A1/MFSD10/SLC22A6
BP	GO:0051988	regulation of attachment of spindle microtubules to kinetochore	0.764055	1.78744	0.0277123	NEK2/SPAG5/ECT2/RCC2/CCNB1/KNSTRN/RACGAP1
BP	GO:0021978	telencephalon regionalization	0.761742	1.82565	0.0204617	SIX3/EMX1/LHX2/ADGRG1/EOMES/BMP4/DMRTA2
BP	GO:0006268	DNA unwinding involved in DNA replication	0.760489	1.8508	0.0189258	RECQL4/BLM/RAD51/MCM4/MCM2/HMGA1/MCM7/TWNK/MCM6
BP	GO:0097152	mesenchymal cell apoptotic process	0.755607	1.81095	0.0242049	PAX2/PAX8/SOX9/HNF1B/MSX2/TBX1/MSX1/ETV6
BP	GO:0060900	embryonic camera-type eye formation	0.754601	1.76533	0.0409988	PAX2/STRA6/PROX1
BP	GO:0006271	DNA strand elongation involved in DNA replication	0.741475	1.97015	0.00951053	GINS1/GINS4/DNA2/MCM4/POLD3/RFC3/LIG1/MCM7/PCNA/GINS2/FEN1/RNASEH2A/MCM3/RFC4/POLE
BP	GO:0072182	regulation of nephron tubule epithelial cell differentiation	0.736835	1.76596	0.045696	PAX2/LHX1/LIF/PAX8/GATA3/STAT1/PROM1
BP	GO:0000076	DNA replication checkpoint	0.729739	1.83583	0.0242049	CDC6/CLSPN/DNA2/CDT1/CDC45/ORC1/TIMELESS/TICRR/RAD9A/TIPIN/TOPBP1
BP	GO:0051383	kinetochore organization	0.726556	1.94943	0.0124613	CENPF/NUF2/CENPA/NDC80/CENPE/CDT1/CENPW/CENPN/CENPK/SMC2/CENPH/CENPS
BP	GO:0034501	protein localization to kinetochore	0.724133	1.85167	0.0223199	CDK1/KNL1/NDC80/AURKB/HASPIN/CDT1/TTK/MTBP/RCC2/SPDL1/BUB3
BP	GO:0021871	forebrain regionalization	0.721544	1.99431	0.00951053	FEZF1/SIX3/LHX1/EMX1/LHX2/FGF8/ADGRG1/EOMES/BMP4/DMRTA2/WNT7B
MF	GO:0017116	single-stranded DNA-dependent ATP-dependent DNA helicase activity	0.710116	1.88683	0.018706	DSCC1/DNA2/RAD51/CHTF18/MCM2/POLQ/RFC3/MCM7/PIF1/RAD18/MCM5/MCM6/HELB/RFC4
MF	GO:0043142	single-stranded DNA-dependent ATPase activity	0.710116	1.88683	0.018706	DSCC1/DNA2/RAD51/CHTF18/MCM2/POLQ/RFC3/MCM7/PIF1/RAD18/MCM5/MCM6/HELB/RFC4
BP	GO:0051382	kinetochore assembly	0.709876	1.78586	0.0365829	CENPF/CENPA/CENPE/CENPW/CENPN/CENPK/CENPH/CENPS
BP	GO:0043011	myeloid dendritic cell differentiation	0.70854	1.83735	0.0277123	DHRS2/CSF2/DCSTAMP/UBD/BATF2/BATF/RELB/LTBR/SPI1
MF	GO:0004003	ATP-dependent DNA helicase activity	0.705141	1.89197	0.0167402	DSCC1/DNA2/RAD51/CHTF18/MCM2/POLQ/RFC3/MCM7/PIF1/RAD18/MCM5/MCM6/HELB/RFC4
MF	GO:0008026	ATP-dependent helicase activity	0.705141	1.89197	0.0167402	DSCC1/DNA2/RAD51/CHTF18/MCM2/POLQ/RFC3/MCM7/PIF1/RAD18/MCM5/MCM6/HELB/RFC4
MF	GO:0070035	purine NTP-dependent helicase activity	0.705141	1.89197	0.0167402	DSCC1/DNA2/RAD51/CHTF18/MCM2/POLQ/RFC3/MCM7/PIF1/RAD18/MCM5/MCM6/HELB/RFC4
BP	GO:0022616	DNA strand elongation	0.700389	1.98696	0.00951053	TERT/GINS1/GINS4/DNA2/MCM4/POLD3/RFC3/LIG1/MCM7/PCNA/GINS2/FEN1/RNASEH2A/MCM3/RFC4/POLE/DCLRE1B
BP	GO:0008608	attachment of spindle microtubules to kinetochore	0.700197	2.0723	0.00951053	NEK2/KIF2C/NUF2/SPAG5/ECT2/SGO1/KNL1/NDC80/CENPE/AURKB/CDT1/RCC2/CCNB1/KNSTRN/MAD1L1/RACGAP1/BUB3
BP	GO:0034587	piRNA metabolic process	0.693449	1.79822	0.0342429	PIWIL1/DDX4/MAEL/GPAT2/HENMT1/TDRD1/PIWIL2/TDRKH/PIWIL4
BP	GO:0006335	DNA replication-dependent nucleosome assembly	0.688079	2.00517	0.00951053	H3C12/ASF1B/H3C10/H3C8/H3C11/H4C12/H4C14/CHAF1A/CHAF1B/H4C13/H4C1/H4C8/H4C15/H4C4/H3C4/IPO4/H4C6/H4C9/H4C2/NASP/H4C5/H3C7
BP	GO:0034723	DNA replication-dependent nucleosome organization	0.688079	2.00517	0.00951053	H3C12/ASF1B/H3C10/H3C8/H3C11/H4C12/H4C14/CHAF1A/CHAF1B/H4C13/H4C1/H4C8/H4C15/H4C4/H3C4/IPO4/H4C6/H4C9/H4C2/NASP/H4C5/H3C7
MF	GO:0003688	DNA replication origin binding	0.68761	1.90052	0.0167402	CDC6/MCM10/ORC6/CDC45/MCM4/ORC1/MCM2/DDX11/MCM8/MCM7/HSPD1/MCM3/MCMDC2/MCM5/MCM6
BP	GO:0032693	negative regulation of interleukin-10 production	0.686417	1.77999	0.0443103	MMP8/IDO1/FOXP3/CD274/TNFRSF21/TRIB2/JAK3
BP	GO:0072079	nephron tubule formation	0.684909	1.77608	0.045696	PAX2/SIX1/PAX8/SOX9/HNF1B/SIX4/GATA3/SOX8/IRX2
CC	GO:0043186	P granule	0.684144	1.79937	0.0323733	PIWIL1/TDRD5/DDX4/MAEL/HENMT1/TDRD1/PIWIL2/TDRKH/MOV10/PIWIL4
CC	GO:0045495	pole plasm	0.684144	1.79937	0.0323733	PIWIL1/TDRD5/DDX4/MAEL/HENMT1/TDRD1/PIWIL2/TDRKH/MOV10/PIWIL4
CC	GO:0060293	germ plasm	0.684144	1.79937	0.0323733	PIWIL1/TDRD5/DDX4/MAEL/HENMT1/TDRD1/PIWIL2/TDRKH/MOV10/PIWIL4
MF	GO:0043138	3'-5' DNA helicase activity	0.682578	1.81366	0.0292183	RECQL4/GINS1/GINS4/BLM/CDC45/MCM2/MCM7/GINS2/MCM5/ACTR5/MCM6
BP	GO:0060065	uterus development	0.67733	1.84246	0.0258249	HOXA11/STRA6/HOXA10/HOXA9/LHX1/RBP4/CYP19A1/GATA3
BP	GO:0061213	positive regulation of mesonephros development	0.676561	1.79767	0.0375849	PAX2/LHX1/SIX1/AGT/PAX8/SOX9/SIX4/GATA3/HOXB7/SOX8
BP	GO:0060142	regulation of syncytium formation by plasma membrane fusion	0.673136	1.9441	0.00951053	DCSTAMP/CXCL9/GCM1/CXCL10/TREM2/GDF15/SCGB3A1/MYF6
BP	GO:0009954	proximal/distal pattern formation	0.671312	1.97551	0.00951053	HOXC10/HOXC11/HOXA11/SP8/SIX3/HOXA10/HOXA9/EN1/HOXD10
BP	GO:0097186	amelogenesis	0.663314	1.85204	0.018706	WDR72/DMP1/KLK5/KLK4/ODAPH/MMP20/MSX2/AMELX/ITGB4/ITGA6/CNNM4/TCIRG1/TBX1
BP	GO:0060706	cell differentiation involved in embryonic placenta development	0.662159	1.86602	0.0147783	ASCL2/GCM1/LIF/E2F7/MDFI/EOMES/PLK4/ST14/SPINT2/SNAI1/CASP8/KRT8/STK3/KRT19/STK4/E2F8/GRHL2
BP	GO:0006270	DNA replication initiation	0.65448	1.99694	0.00951053	CCNE1/CDC6/MCM10/ORC6/CDT1/CDC45/MCM4/ORC1/MCM2/MCM7/TICRR/POLE2/MCM3/MCMDC2/MCM5/PRIM2/MCM6/CCNE2/POLE/LRWD1/RPA4/ORC2/CDK2/WRNIP1/WDR18/POLA2/POLA1
BP	GO:0034080	CENP-A containing nucleosome assembly	0.652298	2.06307	0.00951053	HJURP/CENPI/KNL1/CENPA/CENPO/OIP5/CENPW/CENPL/H4C12/H4C14/CENPN/CENPU/CENPK/H4C13/CENPM/H4C1/H4C8/H4C15/H4C4/CENPH/H4C6/H4C9/CENPS/MIS18A/RUVBL1/H4C2/NASP/H4C5/CENPQ
BP	GO:0061641	CENP-A containing chromatin organization	0.652298	2.06307	0.00951053	HJURP/CENPI/KNL1/CENPA/CENPO/OIP5/CENPW/CENPL/H4C12/H4C14/CENPN/CENPU/CENPK/H4C13/CENPM/H4C1/H4C8/H4C15/H4C4/CENPH/H4C6/H4C9/CENPS/MIS18A/RUVBL1/H4C2/NASP/H4C5/CENPQ
BP	GO:0060143	positive regulation of syncytium formation by plasma membrane fusion	0.647999	1.83833	0.0167402	DCSTAMP/CXCL9/GCM1/TREM2/GDF15/SCGB3A1/MYF6
CC	GO:0032039	integrator complex	0.647893	1.83803	0.0167402	SAGE1/CT45A1/CT45A10/CT45A5/CT45A3/CT45A10
BP	GO:0007094	mitotic spindle assembly checkpoint	0.647211	1.93996	0.00951053	TRIP13/CENPF/BUB1/BUB1B/PLK1/NDC80/CDC20/AURKB/CDT1/TTK/MAD2L1/CCNB1/GEN1/SPDL1/MAD1L1/XRCC3/BUB3/MAD2L2
BP	GO:0031577	spindle checkpoint	0.647211	1.93996	0.00951053	TRIP13/CENPF/BUB1/BUB1B/PLK1/NDC80/CDC20/AURKB/CDT1/TTK/MAD2L1/CCNB1/GEN1/SPDL1/MAD1L1/XRCC3/BUB3/MAD2L2
BP	GO:0071173	spindle assembly checkpoint	0.647211	1.93996	0.00951053	TRIP13/CENPF/BUB1/BUB1B/PLK1/NDC80/CDC20/AURKB/CDT1/TTK/MAD2L1/CCNB1/GEN1/SPDL1/MAD1L1/XRCC3/BUB3/MAD2L2
BP	GO:0071174	mitotic spindle checkpoint	0.647211	1.93996	0.00951053	TRIP13/CENPF/BUB1/BUB1B/PLK1/NDC80/CDC20/AURKB/CDT1/TTK/MAD2L1/CCNB1/GEN1/SPDL1/MAD1L1/XRCC3/BUB3/MAD2L2
BP	GO:0034472	snRNA 3'-end processing	0.644795	1.86225	0.00951053	SAGE1/CT45A1/CT45A10/CT45A5/CT45A3/CT45A10
BP	GO:0051443	positive regulation of ubiquitin-protein transferase activity	0.641619	1.90873	0.0147783	MAGEC2/MAGEA2/MAGEA2B/UBE2C/TRIB3/PLK1/CDC20/UBE2S/MASTL
BP	GO:0016338	calcium-independent cell-cell adhesion via plasma membrane cell-adhesion molecules	0.638141	1.75069	0.0489585	CLDN6/CLDN9/CLDN2/CLDN16/CLDN1/CLDN14/CLDN3/CLDN4/CLDN7/CLDN23/CLDN12
CC	GO:0044815	DNA packaging complex	0.638105	2.36543	0.00951053	H2BW1/H2BW2/H3C12/H1-6/H4C7/H1-8/NCAPH/CENPA/H2BC17/PRM2/H3C15/NCAPG/H2AC4/H2AC17/H3C10/H3C8/H3C11/H2BC3/H2AW/PRM3/H2BC9/H2BC15/H4C12/H4C14/H2BC18/NCAPG2/H2AC16/H2BC14/H2AC13/H2BC11/H1-5/H2AC12/H4C13/H2AC11/H2AX/NCAPD2/SMC2/H2BC13/NCAPD3/H4C1/H2AC8/H1-3/H4C8/H2BU1/H4C15/H4C4/H3-4/H2BC5/H2BC8/H3C4/H2AC19/H4C6/H4C9/H2AB1/PRM1/H2BC6/H4C2/H2BC12/H2AC18/H2AC7/H2AB2/H4C5/H3C7/H1-2/KDM1B/H2AC21/H1-4/SMC…
BP	GO:0045841	negative regulation of mitotic metaphase/anaphase transition	0.637315	1.93327	0.00951053	TRIP13/CENPF/BUB1/BUB1B/PLK1/NDC80/CDC20/AURKB/CDT1/TTK/MAD2L1/CCNB1/GEN1/FBXO5/SPDL1/MAD1L1/XRCC3/BUB3/MAD2L2
BP	GO:0000183	chromatin silencing at rDNA	0.636561	1.9562	0.0124613	H3C12/H3C15/H3C10/H3C8/H3C11/H4C12/H4C14/SUV39H1/H4C13/H4C1/H4C8/H4C15/H4C4/H3C4/H4C6/H4C9/NAA40/H4C2/H4C5/H3C7/BEND3/H3C14/H3C13
BP	GO:0031055	chromatin remodeling at centromere	0.636531	2.05113	0.00951053	HJURP/CENPI/KNL1/CENPA/HELLS/CENPO/OIP5/CENPW/CENPL/H4C12/H4C14/CENPN/CENPU/CENPK/H4C13/CENPM/H4C1/H4C8/H4C15/H4C4/CENPH/H4C6/H4C9/CENPS/MIS18A/RUVBL1/H4C2/NASP/H4C5/CENPQ
BP	GO:0007143	female meiotic nuclear division	0.634164	1.8662	0.0167402	MEIKIN/TOP2A/TRIP13/CDC25B/AURKA/NCAPH/PLK1/TTK/SYCP2/TUBB8/SPIRE2/MASTL/MEIOB/FBXO5/EREG
BP	GO:0034505	tooth mineralization	0.633689	1.75148	0.0480048	WDR72/DMP1/COL1A1/ODAPH/MMP20/MSX2/AMELX/TSPEAR/CNNM4/TCIRG1/TBX1/TFAP2A
BP	GO:0001773	myeloid dendritic cell activation	0.63287	1.81306	0.0258249	DHRS2/CSF2/DCSTAMP/UBD/BATF2/HAVCR2/BATF/RELB/PYCARD/LTBR/SPI1
CC	GO:0000788	nuclear nucleosome	0.632126	1.91753	0.00951053	H3C12/CENPA/H3C10/H3C8/H3C11/H2AW/H4C12/H4C14/H4C13/H4C1/H4C8/H4C15/H4C4/H3-4/H3C4/H4C6/H4C9/H2AB1/H4C2/H2AB2/H4C5/H3C7/H1-4
CC	GO:0000786	nucleosome	0.631772	2.31431	0.00951053	H2BW1/H2BW2/H3C12/H1-6/H4C7/H1-8/CENPA/H2BC17/PRM2/H3C15/H2AC4/H2AC17/H3C10/H3C8/H3C11/H2BC3/H2AW/PRM3/H2BC9/H2BC15/H4C12/H4C14/H2BC18/H2AC16/H2BC14/H2AC13/H2BC11/H1-5/H2AC12/H4C13/H2AC11/H2AX/H2BC13/H4C1/H2AC8/H1-3/H4C8/H2BU1/H4C15/H4C4/H3-4/H2BC5/H2BC8/H3C4/H2AC19/H4C6/H4C9/H2AB1/PRM1/H2BC6/H4C2/H2BC12/H2AC18/H2AC7/H2AB2/H4C5/H3C7/H1-2/KDM1B/H2AC21/H1-4/H3C14/H3C13/H2BC10/SPHK2
BP	GO:0006336	DNA replication-independent nucleosome assembly	0.628216	2.07262	0.00951053	HJURP/CENPI/KNL1/CENPA/CENPO/ASF1B/OIP5/CENPW/CENPL/H4C12/H4C14/CENPN/CENPU/CENPK/H4C13/CENPM/H4C1/H4C8/H4C15/H4C4/CENPH/IPO4/H4C6/H4C9/CENPS/MIS18A/RUVBL1/H4C2/NASP/H4C5/HIRA/CENPQ
BP	GO:0034508	centromere complex assembly	0.626119	2.07503	0.00951053	HJURP/CENPF/CENPI/KNL1/CENPA/CENPE/HELLS/CENPO/OIP5/CENPW/CENPL/H4C12/H4C14/CENPN/CENPU/CENPK/H4C13/CENPM/H4C1/H4C8/H4C15/H4C4/CENPH/H4C6/H4C9/CENPS/MIS18A/RUVBL1/H4C2/NASP/H4C5/CENPQ
BP	GO:2000816	negative regulation of mitotic sister chromatid separation	0.625995	1.92373	0.0124613	TRIP13/CENPF/BUB1/BUB1B/PLK1/NDC80/CDC20/AURKB/CDT1/TTK/MAD2L1/CCNB1/GEN1/PTTG1/FBXO5/SPDL1/MAD1L1/XRCC3/BUB3/MAD2L2
BP	GO:0030574	collagen catabolic process	0.620922	1.99274	0.00951053	MMP8/MMP13/MMP11/KLK6/MMP3/ADAMTS14/MMP7/MMP12/MMP10/FAP/ADAMTS2/MMP9/MMP20/MMP14/MMP24/CTSB/CTSD
BP	GO:0030071	regulation of mitotic metaphase/anaphase transition	0.618851	2.01685	0.00951053	TRIP13/CDC6/CENPF/BUB1/BUB1B/PLK1/NDC80/CENPE/CDC20/AURKB/CDT1/DLGAP5/TTK/MAD2L1/CCNB1/GEN1/NEK6/FBXO5/SPDL1/MAD1L1/XRCC3/BUB3/MAD2L2
BP	GO:0097028	dendritic cell differentiation	0.618497	1.92716	0.0124613	DHRS2/CSF2/DCSTAMP/UBD/TREM2/BATF2/TRPM2/LYN/BATF/TMEM176A/TMEM176B/RELB/HLA-G/LGALS9/LTBR/SPI1
BP	GO:0034724	DNA replication-independent nucleosome organization	0.618326	2.0451	0.00951053	HJURP/CENPI/KNL1/CENPA/CENPO/ASF1B/OIP5/CENPW/CENPL/H4C12/H4C14/CENPN/CENPU/CENPK/H4C13/CENPM/H4C1/H4C8/H4C15/H4C4/CENPH/IPO4/H4C6/H4C9/CENPS/MIS18A/RUVBL1/H4C2/NASP/H4C5/HIRA/CENPQ
CC	GO:0000777	condensed chromosome kinetochore	0.617729	2.27101	0.00951053	KIF2B/MEIKIN/HJURP/NEK2/CENPF/KIF2C/BUB1/NUF2/SKA3/SPAG5/BUB1B/SGO1/KNL1/PLK1/SKA1/CENPA/NDC80/CENPE/ERCC6L/CDT1/ZWINT/CENPO/SPC25/BIRC5/MAD2L1/CENPW/SGO2/SPC24/ZWILCH/CCNB1/CENPN/KNTC1/CENPU/KNSTRN/CENPK/DSN1/REC8/CENPM/CENPH/SPDL1/RANGAP1/PHF6/MAD1L1/CENPS/INCENP/LRWD1/NUP107/BUB3/CKAP5/NUP43/SPOUT1/ORC2/SS18L1/SMC1A/PINX1/NUP37/NUP85/SEH1L/HSF1
BP	GO:0007091	metaphase/anaphase transition of mitotic cell cycle	0.60905	2.00939	0.00951053	TRIP13/CDC6/CENPF/BUB1/BUB1B/PLK1/NDC80/CENPE/CDC20/AURKB/TACC3/CDT1/DLGAP5/TTK/MAD2L1/CCNB1/GEN1/NEK6/FBXO5/SPDL1/MAD1L1/XRCC3/BUB3/MAD2L2
BP	GO:0008209	androgen metabolic process	0.607986	1.74177	0.0480048	HSD3B1/SPP1/AKR1C4/CYP19A1/HSD17B3/CYP17A1/HSD3B2/SCARB1
BP	GO:0045589	regulation of regulatory T cell differentiation	0.60707	1.7691	0.0404961	FANCA/IFNG/RUNX1/LILRB4/FOXP3/FANCD2/MDK/IL2RA/LAG3/KAT2A/TNFSF4/CTLA4/CBFB/HLA-G/LGALS9/SOCS1/IRF1/TNFRSF18/LILRB2/DROSHA/CD46/DUSP10
BP	GO:0010965	regulation of mitotic sister chromatid separation	0.601607	1.9938	0.0124613	TRIP13/CDC6/CENPF/BUB1/BUB1B/PLK1/NDC80/CENPE/CDC20/AURKB/TACC3/CDT1/DLGAP5/TTK/MAD2L1/CCNB1/GEN1/PTTG1/NEK6/FBXO5/SPDL1/MAD1L1/XRCC3/BUB3/MAD2L2
BP	GO:0001580	detection of chemical stimulus involved in sensory perception of bitter taste	0.601379	1.87383	0.0167105	CST1/CST4/CST2/TAS2R38/PIP/CA6/TAS2R8/TAS2R60/LPO/TAS2R16/TAS2R39/TAS2R4/TAS2R10/TAS2R42/AZGP1/TAS2R1/TAS2R9/TAS2R7/TAS2R20/RTP4/TAS2R41/TAS2R19/TAS2R40
BP	GO:0000132	establishment of mitotic spindle orientation	0.601306	1.73665	0.0441845	ACTL8/SAPCD2/PLK1/CENPA/NDC80/MAD2L1/MISP/SPDL1
BP	GO:0033048	negative regulation of mitotic sister chromatid segregation	0.601166	1.87316	0.0167105	TRIP13/CENPF/BUB1/BUB1B/PLK1/NDC80/CDC20/AURKB/CDT1/TTK/MAD2L1/CCNB1/GEN1/PTTG1/FBXO5/SPDL1/MAD1L1/XRCC3/BUB3/MAD2L2
BP	GO:1902099	regulation of metaphase/anaphase transition of cell cycle	0.600344	1.97318	0.00951053	MAPK15/TRIP13/CDC6/CENPF/BUB1/BUB1B/PLK1/NDC80/CENPE/CDC20/AURKB/CDT1/DLGAP5/TTK/MAD2L1/CCNB1/GEN1/NEK6/FBXO5/SPDL1/MAD1L1/XRCC3/BUB3/MAD2L2
BP	GO:0040001	establishment of mitotic spindle localization	0.599525	1.78351	0.0240073	ACTL8/SAPCD2/PLK1/CENPA/NDC80/NUSAP1/MAD2L1/MISP/SPDL1
BP	GO:0045839	negative regulation of mitotic nuclear division	0.599081	1.95242	0.00951053	TRIP13/CENPF/BUB1/BUB1B/PLK1/NDC80/CDC20/AURKB/CDT1/TTK/MTBP/MAD2L1/CHEK1/CCNB1/GEN1/PTTG1/BMP4/FBXO5/SPDL1/KIF25/MAD1L1/XRCC3/BUB3/MAD2L2
BP	GO:0016180	snRNA processing	0.596922	1.8007	0.0167402	SAGE1/CT45A1/CT45A10/CT45A5/CT45A3/CT45A10
BP	GO:1902100	negative regulation of metaphase/anaphase transition of cell cycle	0.595713	1.81763	0.0201752	TRIP13/CENPF/BUB1/BUB1B/PLK1/NDC80/CDC20/AURKB/CDT1/TTK/MAD2L1/CCNB1/GEN1/FBXO5/SPDL1/MAD1L1/XRCC3/BUB3/MAD2L2
BP	GO:0045066	regulatory T cell differentiation	0.595157	1.76142	0.030764	FANCA/IFNG/RUNX1/LILRB4/FOXP3/FANCD2/MDK/IL2RA/LAG3/KAT2A/TNFSF4/CTLA4/CBFB/HLA-G/LGALS9/SOCS1/IRF1/TNFRSF18/LILRB2/PLA2G2D/DROSHA/CD46/DUSP10
BP	GO:0044784	metaphase/anaphase transition of cell cycle	0.592418	1.96334	0.0124613	MAPK15/TRIP13/CDC6/CENPF/BUB1/BUB1B/PLK1/NDC80/CENPE/CDC20/AURKB/TACC3/CDT1/DLGAP5/TTK/MAD2L1/CCNB1/GEN1/NEK6/FBXO5/SPDL1/MAD1L1/XRCC3/BUB3/MAD2L2
BP	GO:0036297	interstrand cross-link repair	0.589881	1.93879	0.0124613	EME1/FANCA/RAD51AP1/FANCI/RAD51/FANCB/UBE2T/FANCD2/MCM8/SLX1A/FAAP24/RFWD3/SLX1B/CENPS/FANCF/POLN/XRCC3/FANCG/RAD51D/DCLRE1B/DCLRE1A/DCLRE1C/FANCC/FANCL/SLX4/ATR/FAAP100
BP	GO:0033046	negative regulation of sister chromatid segregation	0.589772	1.85699	0.0166615	TRIP13/CENPF/BUB1/BUB1B/PLK1/NDC80/CDC20/AURKB/CDT1/TTK/MAD2L1/CCNB1/GEN1/PTTG1/FBXO5/SPDL1/MAD1L1/XRCC3/BUB3/MAD2L2
BP	GO:1905819	negative regulation of chromosome separation	0.586956	1.8139	0.0185523	TRIP13/CENPF/BUB1/BUB1B/PLK1/NDC80/CDC20/AURKB/CDT1/TTK/MAD2L1/CCNB1/GEN1/PTTG1/FBXO5/SPDL1/MAD1L1/XRCC3/BUB3/MAD2L2
MF	GO:0042287	MHC protein binding	0.586755	1.73656	0.045696	KRT17/TAP1/TAP2/PILRB/KIR3DL2/LAG3/FAM49B/BCAP31/TAPBP/CD74/TUBB/COL2A1/PILRA/CD4/KLRK1/KLRC4-KLRK1/LILRB2/DERL1/TUBB4B/LILRB1/HLA-E/KLRD1/VCP
BP	GO:0050912	detection of chemical stimulus involved in sensory perception of taste	0.586736	1.88303	0.0182732	CST1/CST4/CST2/TAS2R38/PIP/PKD2L1/CA6/TAS2R8/TAS2R60/LPO/TAS2R16/TAS2R39/TAS1R2/TAS2R4/TAS2R10/TAS2R42/AZGP1/TAS2R1/TAS2R9/FFAR4/TAS2R7/TAS2R20/RTP4/TAS2R41/TAS2R19/TAS2R40
BP	GO:0007062	sister chromatid cohesion	0.586413	1.95116	0.0124613	MEIKIN/SMC1B/BUB1/CDCA5/BUB1B/SGO1/PLK1/DSCC1/CDC20/HASPIN/AXIN2/SGO2/ESCO2/HORMAD1/RAD21L1/DDX11/FEN1/REC8/KIF22
BP	GO:0051306	mitotic sister chromatid separation	0.584037	1.95435	0.00951053	TRIP13/CDC6/CENPF/BUB1/BUB1B/PLK1/NDC80/CENPE/CDC20/AURKB/TACC3/CDT1/DLGAP5/TTK/MAD2L1/CCNB1/GEN1/PTTG1/NEK6/FBXO5/SPDL1/MAD1L1/XRCC3/BUB3/MAD2L2
MF	GO:0016229	steroid dehydrogenase activity	0.58336	1.75979	0.0275502	HSD3B1/RDH8/RDH16/AKR1C4/AKR1C8P/HSD17B3/HSD3B7/HSD3B2
BP	GO:0007080	mitotic metaphase plate congression	0.583024	1.84398	0.0166615	KIF14/KIF2C/CDCA5/NUF2/KIF18A/CDCA8/NDC80/CENPE/KIFC1/CDT1/CCNB1/PSRC1/KIF22/RRS1/SPDL1/MAD1L1/NUP62
BP	GO:0033260	nuclear DNA replication	0.580423	1.95097	0.00951053	GINS1/BRCA2/DNA2/CDT1/CDC45/RAD51/MCM4/MCM2/POLD1/POLD3/RFC3/DBF4/ATAD5/LIG1/MCM7/PCNA/CDC7/FEN1/CHEK2/POLE2/MCM3/MCM5/PRIM2/AICDA/DONSON/MCM6/RFC4/POLE/DACH1/DBF4B/TIPIN/RTEL1/POLA2/POLA1/SLBP/RFC2/PRIM1/RFC5/POLE3
BP	GO:1905332	positive regulation of morphogenesis of an epithelium	0.580357	1.72649	0.0406343	PAX2/WNT2/LHX1/LIF/SIX1/AGT/PAX8/SOX9/SIX4/ITGAX/GATA3/MDK/HOXB7/SOX8/BMP4
BP	GO:0051784	negative regulation of nuclear division	0.578878	1.93708	0.00951053	LIF/TRIP13/CENPF/BUB1/BUB1B/FBXO43/PLK1/NDC80/CDC20/AURKB/CDT1/TTK/MTBP/MAD2L1/HORMAD1/CHEK1/CCNB1/GEN1/PTTG1/BMP4/FBXO5/DMRT1/SPDL1/KIF25/MAD1L1/XRCC3/BUB3/MAD2L2
CC	GO:0000776	kinetochore	0.57554	2.19286	0.00951053	KIF2B/MEIKIN/HJURP/NEK2/CENPF/KIF2C/BUB1/NUF2/SKA3/SPAG5/CENPI/BUB1B/SGO1/KNL1/KIF18A/PLK1/SKA1/CENPA/NDC80/CENPE/ERCC6L/AURKB/CDT1/ZWINT/TTK/CENPO/SPC25/MTBP/BIRC5/MAD2L1/CENPW/SGO2/SPC24/ZWILCH/CCNB1/CENPN/KNTC1/CENPU/KNSTRN/CENPK/DSN1/REC8/KIF22/CENPM/CENPH/SPDL1/RANGAP1/PHF6/MAD1L1/CENPS/INCENP/LRWD1/NUP107/BUB3/CKAP5/NUP43/SPOUT1/CENPQ/ORC2/SS18L1/SMC1A/PINX1/NUP37/NUP85/SEH1L/XPO1/HSF1/NUP1…
BP	GO:0030261	chromosome condensation	0.574755	1.83722	0.0182732	HMGA2/TOP2A/H1-6/CDCA5/CDK1/H1-8/NCAPH/PRM2/NCAPG/NUSAP1/PRM3/NCAPG2/CCNB1/H1-5/NCAPD2/SMC2/NCAPD3/H1-3/ERN2
BP	GO:0044786	cell cycle DNA replication	0.571535	1.97092	0.00951053	E2F7/GINS1/BRCA2/DNA2/CDT1/CDC45/RAD51/MCM4/MCM2/POLD1/POLD3/RFC3/DBF4/ATAD5/LIG1/MCM7/PCNA/CDC7/FEN1/CHEK2/POLE2/MCM3/FBXO5/MCM5/PRIM2/AICDA/DONSON/MCM6/RFC4/POLE/DACH1/DBF4B/TIPIN/E2F8/SMC1A/RTEL1/POLA2/ZPR1/POLA1/SLBP/RFC2/SMC3/PRIM1/RFC5
BP	GO:0043486	histone exchange	0.571517	1.92103	0.00951053	PIWIL1/HJURP/CENPI/KNL1/CENPA/CENPO/OIP5/CENPW/CENPL/H4C12/H4C14/CENPN/CENPU/CENPK/H4C13/ANP32E/CENPM/H4C1/H4C8/H4C15/H4C4/CENPH/H4C6/H4C9/CENPS/MIS18A/RUVBL1/H4C2/NASP/H4C5/CENPQ/PSME4/CENPP/MIS18BP1/SRCAP/POLE3/H4C11/PTMA
BP	GO:0032467	positive regulation of cytokinesis	0.571501	1.77485	0.0217538	DRD2/KIF14/CDC6/KIF23/SSTR5/CDC25B/ECT2/AURKB/CIT/RXFP3/KIF20B/TAS1R2/KIF3B/CSPP1/NUP62/RACGAP1/PKP4
BP	GO:0051983	regulation of chromosome segregation	0.570111	2.08173	0.00951053	KIF2B/MAPK15/TRIP13/CDC6/MKI67/NEK2/CENPF/KIF2C/BUB1/CDCA5/SPAG5/ECT2/BUB1B/PLK1/NDC80/CENPE/CDC20/AURKB/TACC3/CDT1/DLGAP5/TTK/AXIN2/MAD2L1/HORMAD1/RCC2/CCNB1/DDX11/KNSTRN/RMI2/FEN1/GEN1/PTTG1/NEK6/RAD18/FBXO5/SPDL1/MAD1L1/XRCC3/RACGAP1/BUB3
BP	GO:1905818	regulation of chromosome separation	0.569482	1.91695	0.00951053	MAPK15/TRIP13/CDC6/CENPF/BUB1/BUB1B/PLK1/NDC80/CENPE/CDC20/AURKB/TACC3/CDT1/DLGAP5/TTK/MAD2L1/CCNB1/GEN1/PTTG1/NEK6/FBXO5/SPDL1/MAD1L1/XRCC3/BUB3/MAD2L2
BP	GO:0035987	endodermal cell differentiation	0.56868	1.8075	0.0198975	COL11A1/HMGA2/MMP8/INHBA/LAMA3/MMP9/LAMB3/HNF1B/POU5F1/MMP14/EOMES/COL5A2/DKK1/COL5A1/ITGB2
BP	GO:0000819	sister chromatid segregation	0.566827	2.24118	0.00951053	MAPK15/MEIKIN/TOP2A/KIF14/TRIP13/KIF4A/KIF18B/CDC6/SMC1B/NEK2/CENPF/KIF2C/KIF23/BUB1/CDCA5/NUF2/SPAG5/BUB1B/SGO1/KIF18A/NCAPH/PLK1/CDCA8/DSCC1/NDC80/CENPE/PRC1/CDC20/AURKB/HASPIN/KIFC1/TACC3/CDT1/DLGAP5/ZWINT/NCAPG/TTK/NUSAP1/AXIN2/MAD2L1/KIF4B/SGO2/ESCO2/HORMAD1/CCNB1/RAD21L1/DDX11/KNSTRN/RMI2/PSRC1/FEN1/CENPK/DSN1/REC8/KIF22/GEN1/NCAPD2/SMC2/NCAPD3/PTTG1/NEK6/RRS1/FBXO5/SPDL1/KIF25/MAD1L1/MSTO1…
CC	GO:0005871	kinesin complex	0.56606	1.86756	0.016549	KIF2B/KIF14/KIF4A/KIF12/KIF18B/KIF26B/KIF2C/KIF23/KIF18A/CENPE/KIF20A/KIF15/KIFC1/KIF24/KIF11/KIF4B/KIF26A/KIF20B/KIF22/KIF21B/KIFC2/KIF25/KIF3B
BP	GO:0000070	mitotic sister chromatid segregation	0.565184	2.18098	0.00951053	KIF14/TRIP13/KIF4A/KIF18B/CDC6/NEK2/CENPF/KIF2C/KIF23/BUB1/CDCA5/NUF2/SPAG5/BUB1B/SGO1/KIF18A/NCAPH/PLK1/CDCA8/DSCC1/NDC80/CENPE/PRC1/CDC20/AURKB/HASPIN/KIFC1/TACC3/CDT1/DLGAP5/ZWINT/NCAPG/TTK/NUSAP1/MAD2L1/KIF4B/CCNB1/KNSTRN/PSRC1/CENPK/DSN1/KIF22/GEN1/NCAPD2/SMC2/NCAPD3/PTTG1/NEK6/RRS1/FBXO5/SPDL1/KIF25/MAD1L1/MSTO1/NUP62/INCENP/XRCC3/RACGAP1/BUB3
CC	GO:0000307	cyclin-dependent protein kinase holoenzyme complex	0.562157	1.75954	0.0236943	CCNE1/CNTD2/CDK1/CCNF/CCNB2/CCNA2/CDK6/CCNI2/CCNB1/CKS2/PCNA/CCND1/CKS1B/CCNJ/CCNO/CDK12/CCNE2
BP	GO:0050716	positive regulation of interleukin-1 secretion	0.561621	1.70365	0.0487359	PYDC1/ORM1/SAA1/PANX3/AIM2/NLRP2/CCL3/RIPK2/NLRP7/PYCARD/LGALS9/PANX2
CC	GO:0043596	nuclear replication fork	0.56138	1.74919	0.0255654	MCM10/TONSL/GINS4/CDC45/TIMELESS/POLD1/POLD3/MMS22L/PCNA/GINS2/WDHD1/MCM3/ZMIZ2/PRIM2/HELB/TOP1/TIPIN/RPA4/POLA2/POLA1/PRIM1/PRPF19/RPA3/BAZ1B/ZRANB3/ERCC5
CC	GO:0034358	plasma lipoprotein particle	0.5569	1.69921	0.0475321	APOA2/SAA4/PON1/SAA2/SAA1/APOH/APOC1/APOE/PLA2G7/LIPC/APOC4/LSR/HPR/APOA5/MSR1/APOL1
CC	GO:1990777	lipoprotein particle	0.5569	1.69921	0.0475321	APOA2/SAA4/PON1/SAA2/SAA1/APOH/APOC1/APOE/PLA2G7/LIPC/APOC4/LSR/HPR/APOA5/MSR1/APOL1
BP	GO:0006334	nucleosome assembly	0.5548	2.1226	0.00951053	H2BW1/H2BW2/H3C12/H1-6/HJURP/H4C7/CENPI/H1-8/KNL1/CENPA/H2BC17/SOX9/H3C15/CENPO/ASF1B/MCM2/H3C10/H3C8/H3C11/H2BC3/OIP5/CENPW/H2BC9/H2BC15/CENPL/H4C12/H4C14/H2BC18/CENPN/H2BC14/CHAF1A/CENPU/H2BC11/CENPK/CHAF1B/H1-5/H4C13/H2AX/CENPM/H2BC13/H4C1/H1-3/H4C8/H2BU1/H4C15/H4C4/CENPH/H3-4/H2BC5/H2BC8/H3C4/IPO4/H4C6/H4C9/CENPS/H2AB1/MIS18A/RUVBL1/H2BC6/H4C2/H2BC12/H2AB2/NASP/H4C5/GRWD1/HIRA/SET/CENPQ/H3C7/…
BP	GO:0051985	negative regulation of chromosome segregation	0.554086	1.75245	0.0236507	TRIP13/CENPF/BUB1/BUB1B/PLK1/NDC80/CDC20/AURKB/CDT1/TTK/MAD2L1/CCNB1/GEN1/PTTG1/FBXO5/SPDL1/MAD1L1/XRCC3/BUB3/MAD2L2
BP	GO:0031497	chromatin assembly	0.553839	2.1561	0.00951053	H2BW1/HMGA2/H2BW2/CDKN2A/H3C12/M1AP/H1-6/HJURP/H4C7/CENPI/H1-8/KNL1/CENPA/H2BC17/SOX9/HELLS/H3C15/CENPO/PRDM9/ASF1B/MCM2/H3C10/H3C8/H3C11/H2BC3/OIP5/CENPW/H2BC9/H2BC15/CENPL/H4C12/H4C14/H2BC18/CENPN/H2BC14/CHAF1A/CENPU/HMGA1/H2BC11/CENPK/CHAF1B/H1-5/H4C13/H2AX/CENPM/H2BC13/H4C1/H1-3/H4C8/H2BU1/H4C15/H4C4/CENPH/H3-4/H2BC5/H2BC8/H3C4/IPO4/H4C6/NOC2L/H4C9/CENPS/H2AB1/PARP10/MIS18A/RUVBL1/H2BC6/H4C2/…
MF	GO:0008094	DNA-dependent ATPase activity	0.553593	1.90262	0.00951053	TOP2A/RAD54L/DSCC1/XRCC2/ERCC6L/MSH5/DNA2/BLM/RAD51/CHTF18/MCM2/POLQ/RAD54B/RAD54B/RFC3/DDX11/MCM7/PIF1/RAD18/MCM5/MCM6/HELB/RFC4/TTF2/XRCC3/RAD51D/MSH2
MF	GO:1901618	organic hydroxy compound transmembrane transporter activity	0.553056	1.74919	0.0236507	SLCO1B3/SLC6A3/SLCO1B1/STRA6/SLCO1A2/SLCO1B7/AQP2/RBP4/AKR1C4/SLC16A3/ABCC3/CEACAM1/SLC22A1/MFSD10/ABCB11
BP	GO:2000772	regulation of cellular senescence	0.552747	1.72229	0.028857	HMGA2/CDKN2A/TERT/KRAS/CGAS/CDK6/HMGA1/PRKDC/BCL2L12/RBL1/NEK6/FBXO5/PNPT1/HLA-G/NUAK1/VASH1/KIR2DL4/TP53/PAWR
BP	GO:0051310	metaphase plate congression	0.552301	1.83766	0.0182732	KIF2B/KIF14/CENPF/KIF2C/CDCA5/NUF2/SPAG5/KIF18A/CDCA8/NDC80/CENPE/KIFC1/CDT1/CCNB1/PSRC1/KIF22/RRS1/SPDL1/MAD1L1/NUP62
BP	GO:0001706	endoderm formation	0.551055	1.79134	0.0216792	COL11A1/HMGA2/MMP8/LHX1/INHBA/LAMA3/MMP9/LAMB3/HNF1B/POU5F1/MMP14/EOMES/COL5A2/DKK1/COL5A1/ITGB2
CC	GO:0005876	spindle microtubule	0.549712	1.83949	0.016549	KIF4A/KIF18B/CDK1/SKA3/AURKA/KIF18A/PLK1/SKA1/CENPE/PRC1/AURKB/NUSAP1/BIRC5/KIF11/KNTC1/PSRC1/MISP/NEIL2
BP	GO:0050913	sensory perception of bitter taste	0.549187	1.74554	0.0286158	CST1/CST4/CST2/TAS2R38/PIP/CA6/TAS2R8/TAS2R60/LPO/TAS2R16/ITPR3/TAS2R39/TAS2R4/TAS2R10/TAS2R42/AZGP1/TAS2R1/TAS2R9/TAS2R7/TAS2R20/RTP4/TAS2R41/TAS2R19/TAS2R40
BP	GO:0030449	regulation of complement activation	0.548626	1.7963	0.0235072	CPN1/C4BPA/CFHR4/C8B/CFHR2/CD5L/C2/C9/C8A/C4BPB/F2/CFB/C4A/C3/C4B/CD55/CR2
BP	GO:0043628	ncRNA 3'-end processing	0.546227	1.75302	0.0252437	SAGE1/CT45A1/CT45A10/CT45A5/CT45A3/CT45A10/DKC1/ERI1/EXOSC5/PTCD1/EXOSC4/INTS8/INTS1/POLR3K/INTS7/INTS14/TENT4A/SSB/USB1/FBL/EXOSC9/EXOSC10/EXOSC2
CC	GO:0005657	replication fork	0.543937	1.87373	0.00951053	MCM10/UHRF1/TONSL/GINS4/XRCC2/BLM/CDC45/TIMELESS/POLD1/POLD3/RFC3/MMS22L/PCNA/PIF1/GINS2/DNMT1/H2AX/WDHD1/MCM3/RAD18/ZMIZ2/PRIM2/DONSON/HELB/RFC4/TOP1/XRCC3/RAD51D/TIPIN/RPA4/TP53/POLA2/POLA1/RFC2/PRIM1/RFC5/PRPF19/RPA3/BAZ1B/NBN/ZRANB3/WRN
BP	GO:0090342	regulation of cell aging	0.542835	1.74921	0.0285274	HMGA2/CDKN2A/TERT/FOXM1/KRAS/CGAS/CDK6/HMGA1/PRKDC/BCL2L12/RBL1/NEK6/FBXO5/PNPT1/HLA-G/NUAK1/VASH1/KIR2DL4
BP	GO:2000257	regulation of protein activation cascade	0.541461	1.77964	0.0216792	CPN1/C4BPA/CFHR4/C8B/CFHR2/CD5L/C2/C9/C8A/C4BPB/F2/CFB/C4A/C3/C4B/CD55/CR2
BP	GO:0033047	regulation of mitotic sister chromatid segregation	0.540484	1.84563	0.00951053	TRIP13/CDC6/CENPF/BUB1/BUB1B/PLK1/NDC80/CENPE/CDC20/AURKB/TACC3/CDT1/DLGAP5/TTK/MAD2L1/CCNB1/GEN1/PTTG1/NEK6/FBXO5/SPDL1/MAD1L1/XRCC3/BUB3/MAD2L2
BP	GO:0006323	DNA packaging	0.540409	2.16436	0.00951053	PIWIL1/H2BW1/HMGA2/H2BW2/CDKN2A/H3C12/TOP2A/M1AP/H1-6/HJURP/CDCA5/CDK1/H4C7/CENPI/H1-8/KNL1/NCAPH/CENPA/H2BC17/SOX9/HELLS/PRM2/H3C15/NCAPG/CENPO/PRDM9/NUSAP1/ASF1B/MCM2/H3C10/H3C8/H3C11/H2BC3/OIP5/CENPW/PRM3/H2BC9/H2BC15/CENPL/H4C12/H4C14/H2BC18/NCAPG2/CCNB1/CENPN/H2BC14/CHAF1A/CENPU/HMGA1/H2BC11/CENPK/CHAF1B/H1-5/H4C13/H2AX/NCAPD2/SMC2/CENPM/H2BC13/NCAPD3/H4C1/H1-3/H4C8/H2BU1/H4C15/ERN2/H4C4/CEN…
BP	GO:0051438	regulation of ubiquitin-protein transferase activity	0.538129	1.76194	0.0252329	MAGEC2/MAGEA2/MAGEA2B/UBE2C/TRIB3/PLK1/CDC20/LIMK1/MAD2L1/UBE2S/MASTL/FBXO5/DTX3L/AXIN1
BP	GO:0070228	regulation of lymphocyte apoptotic process	0.538013	1.76156	0.0252329	BIRC7/IDO1/PIP/ADAM8/AURKB/CD274/SLC39A10/LGALS14/LGALS13/LYN/LGALS16/EFNA1/JAK3/BMP4/NOC2L/RAG1/LGALS9/CD74/PDCD1/BAX/TP53/FADD/IRS2
BP	GO:0033045	regulation of sister chromatid segregation	0.53704	1.88951	0.00951053	MAPK15/TRIP13/CDC6/CENPF/BUB1/CDCA5/BUB1B/PLK1/NDC80/CENPE/CDC20/AURKB/TACC3/CDT1/DLGAP5/TTK/AXIN2/MAD2L1/CCNB1/DDX11/RMI2/FEN1/GEN1/PTTG1/NEK6/FBXO5/SPDL1/MAD1L1/XRCC3/BUB3
CC	GO:0000794	condensed nuclear chromosome	0.536636	1.957	0.00951053	FAM9A/MEIKIN/SMC1B/NEK2/BUB1/NUF2/FAM9C/BUB1B/SGO1/AURKA/NCAPH/PLK1/CENPA/NDC80/BRCA2/AURKB/BLM/RAD51/CENPO/P3H4/RCC1/SYCP2/SYCE3/HORMAD1/CHEK1/CCNB1/RAD21L1/CCDC155/FAM9B/CDX2/SUV39H1/CENPK/DSN1/REC8/KMT5C/H2AX/NCAPD2/BRCA1/NOL6/NCAPD3/RRS1/RSPH1/SYCP1/RAD9A/INCENP
CC	GO:0032993	protein-DNA complex	0.535338	2.13781	0.00951053	PAX2/H2BW1/HOXA11/HMGA2/H2BW2/H3C12/TERT/H1-6/H4C7/H1-8/GINS1/TONSL/CENPA/GINS4/H2BC17/PRM2/H3C15/CDC45/H2AC4/H2AC17/H3C10/H3C8/H3C11/H2BC3/H2AW/PRM3/H2BC9/H2BC15/POLD1/POLD3/H4C12/H4C14/H2BC18/H2AC16/H2BC14/PCNA/H2AC13/H2BC11/GINS2/H1-5/H2AC12/NFE2/H4C13/H2AC11/PRKDC/H2AX/H2BC13/H4C1/H2AC8/H1-3/SOX12/H4C8/MCM3/H2BU1/H4C15/H4C4/H3-4/H2BC5/H2BC8/PRIM2/H3C4/H2AC19/DONSON/HELB/H4C6/H4C9/HHEX/RAG1/TO…
CC	GO:0030684	preribosome	0.532889	1.85968	0.0143352	BOP1/BYSL/DCAF13/RRP9/NOL6/RRS1/NOP56/PDCD11/MRTO4/UTP14A/NOC2L/NOP58/HEATR1/PPAN/NOC4L/WDR12/NOP14/PES1/UTP25/RRP1/NIP7/NOL10/BMS1/UTP18/ZNF593/EIF6/LAS1L/PWP2/WDR46/IMP4/RRP1B/UTP6/RIOK1/UTP20/WDR74/WDR3/EBNA1BP2/EMG1/NOB1/RRP7A/FBL/KRI1/MAK16/FTSJ3/RRP36/TBL3/UTP4/LTV1
CC	GO:0098687	chromosomal region	0.532486	2.2564	0.00951053	KIF2B/TERT/MEIKIN/RECQL4/SMC1B/HJURP/NEK2/CENPF/KIF2C/BUB1/CDCA5/CDK1/NUF2/SKA3/SPAG5/CENPI/BUB1B/SGO1/NLRP2/AURKA/KNL1/KIF18A/PLK1/SKA1/CENPA/CDCA8/DSCC1/NDC80/CENPE/BRCA2/ERCC6L/AURKB/PKHD1/HELLS/DNA2/BLM/CDT1/ZWINT/RAD51/NCAPG/TTK/MCM4/CENPO/ORC1/SPC25/MTBP/BIRC5/MAD2L1/MAJIN/MCM2/H2BC3/OIP5/CENPW/SGO2/SPC24/ESCO2/POLD1/CENPL/H4C12/RCC2/H4C14/ZWILCH/CHEK1/CCNB1/CCDC155/CENPN/KNTC1/CENPU/SUV39H…
BP	GO:0006261	DNA-dependent DNA replication	0.530954	2.05554	0.00951053	CCNE1/RECQL4/CDC6/MCM10/EME1/E2F7/GINS1/TONSL/DSCC1/GINS4/BRCA2/ORC6/DNA2/BLM/CDT1/CDC45/RAD51/CHTF18/MCM4/ORC1/MCM2/TIMELESS/POLQ/POLD1/POLD3/RFC3/DBF4/HMGA1/ATAD5/MMS22L/DDX11/LIG1/MCM7/PCNA/TWNK/GINS2/CDC7/FEN1/RNASEH2A/CHEK2/TICRR/POLE2/GEN1/WDHD1/RFWD3/MGME1/MCM3/MCMDC2/FBXO5/MCM5/PRIM2/AICDA/DONSON/MCM6/HELB/CCNE2/CENPS/RFC4/POLE/LRWD1/POLN/DACH1/DBF4B/TIPIN/BAZ1A/E2F8/RPA4/POLG2/ORC2/CDK2/…
BP	GO:0030199	collagen fibril organization	0.52845	1.72223	0.0300813	COL11A1/MMP11/ADAMTS14/ACAN/COL1A1/COMP/ADAMTS2/FOXC1/PLOD3/COL3A1/P3H4/COL1A2/SERPINH1/COL5A2/LOXL2/SERPINF2/COL5A1/COLGALT1/PLOD1/LOX
BP	GO:0051304	chromosome separation	0.526657	1.8866	0.00951053	MAPK15/TOP2A/M1AP/TRIP13/CDC6/CENPF/BUB1/EME1/BUB1B/NCAPH/PLK1/NDC80/CENPE/CDC20/AURKB/TACC3/CDT1/DLGAP5/TTK/MAD2L1/CCNB1/GEN1/NCAPD2/MEIOB/NCAPD3/PTTG1/NEK6/FBXO5/SPDL1/MAD1L1/CENPS/XRCC3/BUB3/MAD2L2/SHOC1/RMI1/CSNK2A1
MF	GO:0005549	odorant binding	0.525387	1.87235	0.00951053	OBP2B/OR8A1/OR5M11/OR8K5/OR8B12/OR5P3/OBP2A/OR8D1/OR10Q1/OR14I1/OR8G5/OR8K1/OR5AU1/OR5AN1/OR14A16/OR8G1/OR8D2/OR8D4/OR5F1/OR5I1/OR5M8/OR9Q2
BP	GO:0002455	humoral immune response mediated by circulating immunoglobulin	0.52429	1.68262	0.0379897	C4BPA/CRP/FOXJ1/C8B/APCS/EXO1/C2/C9/C8A/C4BPB/ZP3/C4A/C3/HLA-DQB1/MBL2/C4B/CD55/CR2/FCER2/HPX/C1QB/PTPN6/LTA/C1QC
BP	GO:0006333	chromatin assembly or disassembly	0.523959	2.07675	0.00951053	H2BW1/HMGA2/H2BW2/CDKN2A/H3C12/M1AP/H1-6/HJURP/H4C7/CENPI/H1-8/KNL1/CENPA/H2BC17/SOX9/HELLS/H3C15/CENPO/PRDM9/ASF1B/MCM2/H3C10/H3C8/H3C11/H2BC3/OIP5/CENPW/H2AW/H2BC9/H2BC15/CENPL/H4C12/H4C14/H2BC18/CENPN/H2BC14/CHAF1A/CENPU/HMGA1/H2BC11/CENPK/CHAF1B/H1-5/NFE2/H4C13/PADI2/H2AX/CENPM/H2BC13/H4C1/H1-3/H4C8/H2BU1/H4C15/H4C4/CENPH/H3-4/H2BC5/H2BC8/SUV39H2/H3C4/IPO4/H4C6/NOC2L/H4C9/CENPS/H2AB1/PARP10/M…
BP	GO:0043039	tRNA aminoacylation	0.523514	1.68695	0.0367118	WARS1/DARS2/VARS1/MARS2/YARS1/NARS2/GARS1/FARSA/PPA1/TARS1/AARS1/SARS2/TARS2/EPRS1/EARS2/CARS1/AIMP2/EEF1E1/PARS2/KARS1/YARS2/VARS2/GATC/FARSB/IARS1/QRSL1/LARS2/NARS1/CARS2/IARS2/AARS2/MARS1/AARSD1
CC	GO:0000792	heterochromatin	0.520819	1.82709	0.0124428	HMGA2/SALL4/CDKN2A/EME1/FOXC1/CBX2/UHRF1/CENPA/HELLS/ESCO2/HMGA1/SUV39H1/H1-5/KMT5C/DNMT1/CBX8/NCAPD3/SNAI1/CBX3/INCENP/HDAC1/LRWD1/MORC2/TRIM28/PCGF2/ORC2/BEND3/PML/WDR76/H1-4/RRP1B/HSF1/SUZ12/SIRT6/UBA1/CENPB/RNF2/RNF40
BP	GO:0043038	amino acid activation	0.52056	1.68533	0.045696	WARS1/DARS2/VARS1/MARS2/YARS1/NARS2/GARS1/FARSA/PPA1/TARS1/AARS1/SARS2/TARS2/EPRS1/EARS2/CARS1/AIMP2/EEF1E1/PARS2/KARS1/YARS2/VARS2/GATC/FARSB/IARS1/QRSL1/LARS2/NARS1/CARS2/IARS2/AARS2/MARS1/AARSD1
BP	GO:0006418	tRNA aminoacylation for protein translation	0.519282	1.65049	0.0480048	WARS1/DARS2/VARS1/MARS2/YARS1/NARS2/GARS1/FARSA/PPA1/TARS1/AARS1/SARS2/TARS2/EPRS1/EARS2/CARS1/AIMP2/EEF1E1/PARS2/KARS1/YARS2/VARS2/FARSB/IARS1/LARS2/NARS1/CARS2/IARS2/AARS2/MARS1/AARSD1
BP	GO:0051653	spindle localization	0.514867	1.65909	0.0469539	ACTL8/SAPCD2/PLK1/CENPA/ASPM/NDC80/NUSAP1/MAD2L1/CCDC155/LLGL2/SPIRE2/MISP/SPDL1/KIF25
BP	GO:0032206	positive regulation of telomere maintenance	0.514424	1.67652	0.0480048	MAPK15/NEK2/AURKB/DKC1/SLX1A/CCT5/SLX1B/CCT6A/CCT2/CCT3/SLX4/ATR/PML/FBXO4/RTEL1/HNRNPA2B1/GNL3/SIRT6/NABP2/PNKP/CTNNB1/NBN/MAPKAPK5/TCP1/PPP1R10/MRE11/XRCC5/PARN/HNRNPD/ACD/CCT8/CCT7/CCT4/TNKS
BP	GO:0009994	oocyte differentiation	0.513836	1.6746	0.0480048	SOHLH1/TDRD5/LGR5/TRIP13/PABPC1L/YBX2/CDC25B/AURKA/INHBB/BRCA2/ZP3/NPM2/CCNB1/TUBB8/REC8/FBXO5/DMRT1
MF	GO:0031492	nucleosomal DNA binding	0.513157	1.68017	0.0469539	HMGA2/H3C12/H1-6/H1-8/CENPA/H3C15/RCC1/H3C10/H3C8/H3C11/H1-5/H1-3/H3-4/H3C4/HDAC1/ACTL6A/H3C7/H1-2/H1-4/SMARCA4/H3C14/H3C13/HDAC2/H1-1
BP	GO:0071103	DNA conformation change	0.512756	2.15716	0.00951053	PIWIL1/H2BW1/HMGA2/H2BW2/CDKN2A/H3C12/TOP2A/M1AP/H1-6/RECQL4/HJURP/HMGB3/CDCA5/CDK1/RAD54L/H4C7/CENPI/H1-8/KNL1/GINS1/NCAPH/CENPA/DSCC1/GINS4/H2BC17/SOX9/ERCC6L/HELLS/DNA2/BLM/PRM2/H3C15/CDC45/RAD51/CHTF18/NCAPG/MCM4/CENPO/PRDM9/NUSAP1/ASF1B/MCM2/POLQ/H3C10/H3C8/H3C11/H2BC3/OIP5/RAD54B/RAD54B/CENPW/BRIP1/PRM3/H2BC9/H2BC15/CENPL/H4C12/H4C14/H2BC18/NCAPG2/CCNB1/RFC3/CENPN/H2BC14/CHAF1A/CENPU/HMGA1/…
BP	GO:0060337	type I interferon signaling pathway	0.510997	1.84321	0.00951053	IFNA8/IFNA1/MMP12/IFNB1/IFI6/OAS3/NLRC5/IFNA5/IRAK1/STAT1/OAS2/IFITM1/ISG15/HLA-A/IFIT3/XAF1/HLA-F/SCRIB/MX1/IRF3/HLA-B/HLA-G/IFITM3/ADAR/ABCE1/RSAD2/PSMB8/IRF7/IFIT2/IRF1/IFNA14/HSP90AB1/STAT2/IKBKE/IRF5/TYK2/PTPN6/HLA-C/USP18/BST2/OAS1/MX2/FADD/IRF8/DCST1
BP	GO:0071357	cellular response to type I interferon	0.510997	1.84321	0.00951053	IFNA8/IFNA1/MMP12/IFNB1/IFI6/OAS3/NLRC5/IFNA5/IRAK1/STAT1/OAS2/IFITM1/ISG15/HLA-A/IFIT3/XAF1/HLA-F/SCRIB/MX1/IRF3/HLA-B/HLA-G/IFITM3/ADAR/ABCE1/RSAD2/PSMB8/IRF7/IFIT2/IRF1/IFNA14/HSP90AB1/STAT2/IKBKE/IRF5/TYK2/PTPN6/HLA-C/USP18/BST2/OAS1/MX2/FADD/IRF8/DCST1
BP	GO:0032200	telomere organization	0.509076	1.99866	0.00951053	CCNE1/H3C12/MAPK15/TERT/RECQL4/NEK2/EXO1/BRCA2/AURKB/DNA2/BLM/RAD51/H3C10/H3C8/H3C11/POLD1/POLD3/H4C12/H4C14/RFC3/DKC1/PCNA/PIF1/FEN1/H4C13/POLE2/SRC/PRKDC/SLX1A/H4C1/H4C8/CCT5/H4C15/H4C4/H3-4/PRIM2/H3C4/SLX1B/H4C6/H4C9/CCNE2/CCT6A/SMG5/RFC4/POLE/XRCC3/RAD51D/DCLRE1B/DCLRE1A/DCLRE1C/H4C2/NAT10/WRAP53/HSP90AB1/H4C5/HSP90AA1/GAR1/CCT2/CCT3/SLX4/DOT1L/ATR/H3C7/GNL3L/PML/TELO2/LTO1/FBXO4/PINX1/SMG7/R…
CC	GO:0000793	condensed chromosome	0.508552	2.05709	0.00951053	KIF2B/FAM9A/MEIKIN/TOP2A/SMC1B/HJURP/MKI67/NEK2/CENPF/KIF2C/BUB1/CDCA5/NUF2/FAM9C/SKA3/SPAG5/BUB1B/SGO1/AURKA/KNL1/NCAPH/PLK1/SKA1/CENPA/NDC80/CENPE/BRCA2/ERCC6L/AURKB/BLM/CDT1/ZWINT/RAD51/NCAPG/CENPO/SPC25/P3H4/BIRC5/RCC1/MAD2L1/SYCP2/FANCD2/SYCE3/CENPW/SGO2/SPC24/HORMAD1/ZWILCH/CHEK1/NCAPG2/CCNB1/RAD21L1/CCDC155/CENPN/FAM9B/KNTC1/CDX2/CENPU/SUV39H1/KNSTRN/CENPK/DSN1/REC8/KMT5C/H2AX/NCAPD2/BRCA1…
BP	GO:0000723	telomere maintenance	0.505452	1.97146	0.00951053	CCNE1/MAPK15/TERT/RECQL4/NEK2/EXO1/BRCA2/AURKB/DNA2/BLM/RAD51/POLD1/POLD3/H4C12/H4C14/RFC3/DKC1/PCNA/PIF1/FEN1/H4C13/POLE2/SRC/PRKDC/SLX1A/H4C1/H4C8/CCT5/H4C15/H4C4/H3-4/PRIM2/SLX1B/H4C6/H4C9/CCNE2/CCT6A/SMG5/RFC4/POLE/XRCC3/RAD51D/DCLRE1B/DCLRE1A/DCLRE1C/H4C2/NAT10/WRAP53/HSP90AB1/H4C5/HSP90AA1/GAR1/CCT2/CCT3/SLX4/ATR/GNL3L/PML/TELO2/LTO1/FBXO4/PINX1/SMG7/RTEL1/POLA2/DCP2/HNRNPA2B1/POLA1/PARP1/G…
BP	GO:0045071	negative regulation of viral genome replication	0.504825	1.6797	0.0379897	IFNL3/HMGA2/IFNB1/PROX1/OAS3/IFITM1/ISG15/FAM111A/AICDA/MX1/IFITM3/PARP10/MORC2/RSAD2/TRIM28/APOBEC3H/SRPK1/BST2/OAS1/ILF3/APOBEC3G/PLSCR1/ZC3H12A/APOBEC3F/RESF1/TNF/APOBEC3A/SETDB1/IFITM2/APOBEC3D/BANF1
BP	GO:0022617	extracellular matrix disassembly	0.504675	1.77564	0.0180389	MMP8/MMP13/MMP11/MMP3/MMP7/MELTF/KLK5/MMP12/MMP10/KLK4/FGFR4/FAP/ADAM8/CTRB2/MMP9/FSCN1/CTRB1/TIMP1/MMP20/MMP14/BMP1/PLG/CTSV/DDR1/ADAM10/TLL2
MF	GO:0004222	metalloendopeptidase activity	0.501102	1.83268	0.00951053	MMP8/MMP13/MMP11/MMP3/ADAMTS14/ADAMTS20/MMP7/ADAM12/ADAMTS12/MMP12/MMP10/FAP/ADAMTS2/ADAM8/ECEL1/ADAMTS18/MMP9/TRABD2A/MMP20/ADAM2/ADAM18/ASTL/MMP14/ADAM30/MMP24/ADAM32/BMP1/ADAMTS7
BP	GO:0034340	response to type I interferon	0.501047	1.81854	0.00951053	IFNA8/IFNA1/MMP12/IFNB1/IFI6/OAS3/NLRC5/IFNA5/IRAK1/STAT1/OAS2/IFITM1/ISG15/HLA-A/IFIT3/XAF1/HLA-F/SCRIB/MX1/IRF3/HLA-B/HLA-G/SHMT2/IFITM3/ADAR/ABCE1/RSAD2/PSMB8/IRF7/IFIT2/IRF1/IFNA14/HSP90AB1/STAT2/IKBKE/IRF5/TYK2/PTPN6/HLA-C/USP18/BST2/OAS1/MX2/FADD/IRF8/DCST1
BP	GO:0051303	establishment of chromosome localization	0.50089	1.74801	0.0215166	KIF2B/KIF14/CENPF/KIF2C/CDCA5/NUF2/SPAG5/KIF18A/CDCA8/NDC80/CENPE/KIFC1/CDT1/DLGAP5/MAJIN/CCNB1/RAD21L1/CCDC155/PSRC1/KIF22/RRS1/SPDL1/MAD1L1/NUP62
BP	GO:0034502	protein localization to chromosome	0.500606	1.76951	0.0143266	TERT/CDCA5/CDK1/KNL1/PLK1/CENPA/NDC80/BRCA2/AURKB/HASPIN/CDT1/TTK/MTBP/ESCO2/RCC2/DKC1/MCM8/EZH2/H1-5/CCT5/SPDL1/CCT6A/LRWD1/BUB3/MSH2/WRAP53/CENPQ/CCT2/CCT3/ATR/GNL3L/PINX1/RUVBL2/GNL3/RAD21/NABP2/LEMD2/HDAC8/MACROH2A1/TCP1/ZW10/SLF1/XRCC5/CHAMP1/NIPBL/CARM1/ACD/RB1/CCT8/CCT7
MF	GO:0003678	DNA helicase activity	0.500508	1.76098	0.0180389	RECQL4/GINS1/DSCC1/GINS4/ERCC6L/DNA2/BLM/CDC45/RAD51/CHTF18/MCM4/MCM2/POLQ/RAD54B/RAD54B/BRIP1/RFC3/DDX11/MCM8/MCM7/PIF1/CHD7/TWNK/GINS2/MCM3/RAD18/MCM5/ACTR5/MCM6/HELB/RFC4
BP	GO:0034728	nucleosome organization	0.500044	1.97165	0.00951053	PIWIL1/H2BW1/H2BW2/H3C12/H1-6/HJURP/H4C7/CENPI/H1-8/KNL1/CENPA/H2BC17/SOX9/H3C15/CENPO/PRDM9/ASF1B/MCM2/H3C10/H3C8/H3C11/H2BC3/OIP5/CENPW/H2AW/H2BC9/H2BC15/CENPL/H4C12/H4C14/H2BC18/CENPN/H2BC14/CHAF1A/CENPU/HMGA1/H2BC11/CENPK/CHAF1B/H1-5/NFE2/H4C13/H2AX/ANP32E/CENPM/H2BC13/H4C1/H1-3/H4C8/H2BU1/H4C15/H4C4/CENPH/H3-4/H2BC5/H2BC8/H3C4/IPO4/H4C6/H4C9/CENPS/H2AB1/MIS18A/RUVBL1/H2BC6/H4C2/H2BC12/H2AB2/…
BP	GO:0140014	mitotic nuclear division	0.498781	2.05502	0.00951053	KIF14/UBE2C/TPX2/TRIP13/MYBL2/KIF4A/KIF18B/PKMYT1/CDC6/MKI67/NEK2/CENPF/KIF2C/KIF23/BUB1/CDCA5/NUF2/EGF/SPAG5/ANLN/BUB1B/SGO1/AURKA/KIF18A/NCAPH/PLK1/CDCA8/CDC25C/DSCC1/NDC80/CENPE/PRC1/CDC20/FGF8/AURKB/HASPIN/KIFC1/TACC3/CDT1/DLGAP5/ZWINT/NCAPG/TTK/MTBP/NUSAP1/BIRC5/RCC1/MAD2L1/KIF11/KIF4B/UBE2S/BORA/CHEK1/NPM2/CCNB1/IGF2/KNTC1/KNSTRN/KIF20B/PSRC1/CENPK/DSN1/CHEK2/KIF22/GEN1/NCAPD2/SMC2/PDGFB/MZ…
BP	GO:0032963	collagen metabolic process	0.497148	1.82771	0.00951053	MMP8/MMP13/MMP11/KLK6/MMP3/ADAMTS14/MMP7/COL1A1/MMP12/MMP10/FAP/ADAMTS2/MMP9/MYB/PLOD3/MMP20/F2/UCN/P3H4/AMELX/COL1A2/F2R/MMP14/SERPINH1/MMP24/IHH/CTSB/RCN3/SERPINF2/ITGA2/CBX8/CTSD/COL5A1/BMP4/PDGFRB/P3H1
MF	GO:0004536	deoxyribonuclease activity	0.497026	1.66318	0.0409988	EME1/DNASE2B/EXO1/DNA2/DNASE1L2/POLD1/FEN1/GEN1/NME1/MEIOB/SLX1A/MGME1/SLX1B/RAG1/RAD9A/POLE/XRCC3/DCLRE1B/APEX2/RBBP8/DCLRE1A/DCLRE1C/DFFB/SLX4/DNASE2/RAD1/DNASE1L1/TATDN2/APTX/ZRANB3/APEX1/ERCC5/EME2/MRE11/XRCC1/TATDN1
BP	GO:0050000	chromosome localization	0.495422	1.73112	0.0232237	KIF2B/KIF14/CENPF/KIF2C/CDCA5/NUF2/SPAG5/KIF18A/CDCA8/NDC80/CENPE/KIFC1/CDT1/DLGAP5/MAJIN/CCNB1/RAD21L1/CCDC155/PSRC1/KIF22/RRS1/SPDL1/MAD1L1/NUP62
BP	GO:0070227	lymphocyte apoptotic process	0.494775	1.69383	0.029808	BIRC7/IDO1/PIP/ADAM8/AURKB/CD274/SLC39A10/LGALS14/LGALS13/TNFRSF21/LYN/LGALS16/IL2RA/EFNA1/JAK3/BMP4/NOC2L/RAG1/FASLG/LGALS9/CD74/PDCD1/KDELR1/BAX/TP53/FADD/BCL2L11/IRS2
BP	GO:0032204	regulation of telomere maintenance	0.493395	1.74033	0.019511	MAPK15/NEK2/AURKB/DKC1/PIF1/SRC/SLX1A/CCT5/SLX1B/CCT6A/SMG5/NAT10/CCT2/CCT3/SLX4/ATR/GNL3L/PML/FBXO4/PINX1/SMG7/RTEL1/DCP2/HNRNPA2B1/PARP1/GNL3/SIRT6/NABP2/PNKP/CTNNB1/HDAC8/EXOSC10/NBN/UPF1/HNRNPU/MAPKAPK5/TCP1/PPP1R10/MRE11/XRN1/XRCC5/XRCC1/PARN/HNRNPD/ACD/USP7/CCT8/CCT7/SMG1/CCT4/TNKS
BP	GO:0002920	regulation of humoral immune response	0.49339	1.70143	0.0267715	CPN1/C4BPA/FOXJ1/CFHR4/KLK5/ACOD1/C8B/CFHR2/CD5L/C2/C9/C8A/C4BPB/F2/ZP3/CFB/C4A/C3/C4B/CD55/CR2/FCER2/HPX/C1QB/CFHR5/CPB2/PTPN6/LTA/C1QC
BP	GO:1902850	microtubule cytoskeleton organization involved in mitosis	0.492223	1.86638	0.00951053	ACTL8/TPX2/MYBL2/SAPCD2/KIF4A/STIL/NEK2/KIF23/WDR62/NUF2/AURKA/PLK1/CENPA/NDC80/CENPE/PRC1/CDC20/AURKB/KIFC1/TACC3/TTK/SPC25/NUSAP1/BIRC5/RCC1/MAD2L1/KIF11/KIF4B/BORA/POC1A/CCNB1/PSRC1/CHEK2/MZT1/MISP/STMN1/SPDL1/KIF3B/MSTO1/NUP62
BP	GO:0098813	nuclear chromosome segregation	0.490374	2.01401	0.00951053	CCNE1/KIF2B/MAPK15/MEIKIN/TOP2A/M1AP/KIF14/MAEL/TRIP13/KIF4A/KIF18B/CDC6/SMC1B/NEK2/CENPF/KIF2C/KIF23/BUB1/EME1/CDCA5/NUF2/SPAG5/ECT2/BUB1B/SGO1/KNL1/KIF18A/NCAPH/PLK1/CDCA8/DSCC1/NDC80/CENPE/PRC1/CDC20/AURKB/HASPIN/KIFC1/TACC3/CDT1/DLGAP5/ZWINT/NCAPG/TTK/P3H4/NUSAP1/AXIN2/MAD2L1/SYCP2/MAJIN/FANCD2/KIF4B/SYCE3/SGO2/ESCO2/BRIP1/HORMAD1/RCC2/CCNB1/RAD21L1/CCDC155/DDX11/KNSTRN/RMI2/PSRC1/FEN1/CENPK/…
BP	GO:0032465	regulation of cytokinesis	0.489883	1.75487	0.0194101	DRD2/KIF14/CDC6/KIF23/E2F7/SSTR5/CDC25B/ECT2/AURKA/PLK1/PRC1/BRCA2/KIF20A/AURKB/CIT/RXFP3/KIF20B/TAS1R2/BCL2L1/RAB11FIP4/KIF3B/CSPP1/NUP62/INCENP/GIT1/RACGAP1/ENTR1/MYO19/PKP4/E2F8
BP	GO:0060147	regulation of posttranscriptional gene silencing	0.48832	1.81498	0.00951053	TRIM71/H3C12/TERT/MAEL/H3C15/H3C10/POU5F1/H3C8/H3C11/H4C12/H4C14/MYCN/NDC1/H4C13/NUP210/H4C1/H4C8/BMP4/XPO5/H4C15/H4C4/NUP155/H3C4/H4C6/H4C9/NUP62/NUP188/NUP107/ADAR/H4C2/NUP43/H4C5/AJUBA/AGO2/RAE1/TP53/H3C7/NUP58/EGFR/NUP37/NCOR2/NUP85/H3C14/H3C13/SEH1L/NUP50/NUP205/NUP160/ZC3H12A/NUP93/POLR2H/POM121C/FMR1/POM121/POLR2D/H4C11/LIN28A/PPP3CA/PPARG
BP	GO:0060966	regulation of gene silencing by RNA	0.48832	1.81498	0.00951053	TRIM71/H3C12/TERT/MAEL/H3C15/H3C10/POU5F1/H3C8/H3C11/H4C12/H4C14/MYCN/NDC1/H4C13/NUP210/H4C1/H4C8/BMP4/XPO5/H4C15/H4C4/NUP155/H3C4/H4C6/H4C9/NUP62/NUP188/NUP107/ADAR/H4C2/NUP43/H4C5/AJUBA/AGO2/RAE1/TP53/H3C7/NUP58/EGFR/NUP37/NCOR2/NUP85/H3C14/H3C13/SEH1L/NUP50/NUP205/NUP160/ZC3H12A/NUP93/POLR2H/POM121C/FMR1/POM121/POLR2D/H4C11/LIN28A/PPP3CA/PPARG
BP	GO:0043044	ATP-dependent chromatin remodeling	0.487984	1.74555	0.0194101	PIWIL1/HJURP/CENPI/KNL1/CENPA/CENPO/OIP5/CENPW/CENPL/H4C12/H4C14/CENPN/CENPU/CENPK/H4C13/ANP32E/CENPM/H4C1/H4C8/H4C15/H4C4/CENPH/ACTR5/H4C6/H4C9/CENPS/HDAC1/MIS18A/RUVBL1/H4C2/NASP/H4C5/CENPQ/ACTL6B/ACTL6A/SMARCA4/PSME4/CENPP/HDAC2/MIS18BP1/SRCAP/POLE3/H4C11/PTMA
BP	GO:0060968	regulation of gene silencing	0.487933	1.88386	0.00951053	TRIM71/H3C12/TERT/H1-6/MAEL/H1-8/ATAD2/H3C15/CDC45/H3C10/POU5F1/H3C8/H3C11/H4C12/H4C14/MYCN/HMGA1/NDC1/H1-5/H4C13/NUP210/DNMT1/H4C1/H1-3/H4C8/BMP4/XPO5/H4C15/H4C4/NUP155/AICDA/H3C4/H4C6/H4C9/NUP62/NAA40/NUP188/NUP107/ADAR/MORC2/H4C2/TRIM28/NUP43/H4C5/AJUBA/AGO2/HIRA/RAE1/TP53/CDK2/H3C7/H1-2/NUP58/EGFR/NUP37/H1-4/NCOR2/NUP85/H3C14/H3C13/SEH1L/NUP50/SIRT6/NUP205/NUP160/ZC3H12A/NUP93/RESF1/POLR2H/H1…
BP	GO:1904356	regulation of telomere maintenance via telomere lengthening	0.486924	1.64173	0.046861	MAPK15/NEK2/AURKB/DKC1/PIF1/SRC/SLX1A/CCT5/SLX1B/CCT6A/SMG5/NAT10/CCT2/CCT3/SLX4/ATR/GNL3L/FBXO4/PINX1/SMG7/RTEL1/DCP2/HNRNPA2B1/PARP1/PNKP/CTNNB1/EXOSC10/HNRNPU/MAPKAPK5/TCP1/XRN1/XRCC5/PARN/ACD/CCT8/CCT7/CCT4/TNKS
BP	GO:0006260	DNA replication	0.484583	2.00692	0.00951053	STRA8/CCNE1/RECQL4/CDC6/CLSPN/MCM10/EME1/E2F7/CDK1/GINS1/TONSL/EXO1/DSCC1/GINS4/BRCA2/DTL/ORC6/DNA2/BLM/CDT1/CDC45/RAD51/CHTF18/MCM4/UCN/ORC1/MCM2/TIMELESS/POLQ/PCLAF/RRM2/CCNA2/ESCO2/BRIP1/GDF2/POLD1/POLD3/MCIDAS/CHEK1/NPM2/RFC3/DBF4/CHAF1A/HMGA1/ATAD5/MMS22L/DDX11/LIG1/MCM8/MCM7/PCNA/PIF1/TWNK/RMI2/GINS2/CDC7/FEN1/RNASEH2A/CHAF1B/CHEK2/TICRR/GTPBP4/POLE2/GEN1/BRCA1/WDHD1/TOP1MT/RFWD3/MGME1/MCM3…
BP	GO:0070192	chromosome organization involved in meiotic cell cycle	0.483512	1.64528	0.045696	CCNE1/MEIKIN/MAEL/TRIP13/BUB1/BUB1B/NCAPH/RAD51/P3H4/SYCP2/MAJIN/FANCD2/SYCE3/SGO2/BRIP1/HORMAD1/RAD21L1/CCDC155/NDC1/REC8/NCAPD2/MEIOB/SMC2/NCAPD3/MCMDC2/SYCP1/CCNE2
BP	GO:0051321	meiotic cell cycle	0.48228	1.97475	0.00951053	ZFP42/PIWIL1/STRA8/CCNE1/MAPK15/FAM9A/LIF/MEIKIN/TOP2A/M1AP/DDX4/MAEL/TRIP13/PKMYT1/BOLL/TEX19/SMC1B/NEK2/BUB1/EME1/NUF2/FAM9C/CDC25B/RAD54L/BUB1B/FBXO43/FANCA/SGO1/AURKA/H1-8/KIF18A/NCAPH/PLK1/EXO1/ASPM/CDC25C/BRCA2/CDC20/XRCC2/CDC25A/MSH5/RAD51/MSX2/TTK/PRDM9/PIWIL3/P3H4/SYCP2/MAJIN/FANCD2/MND1/RAD54B/SYCE3/RAD54B/SGO2/BRIP1/SLC26A8/HORMAD1/NPM2/RAD21L1/CKS2/CCDC155/FAM9B/TUBB8/NDC1/REC8/NSUN2/…
BP	GO:0007059	chromosome segregation	0.481953	2.02421	0.00951053	CCNE1/KIF2B/MAPK15/MEIKIN/TOP2A/M1AP/KIF14/MAEL/TRIP13/KIF4A/KIF18B/CDC6/SMC1B/HJURP/MKI67/NEK2/CENPF/KIF2C/KIF23/BUB1/EME1/CDCA5/NUF2/SKA3/SPAG5/ECT2/CDCA2/BUB1B/SGO1/KNL1/KIF18A/NCAPH/PLK1/SKA1/CDCA8/DSCC1/NDC80/CENPE/PRC1/CDC20/AURKB/HASPIN/KIFC1/TACC3/CDT1/DLGAP5/ZWINT/NCAPG/TTK/SPC25/P3H4/NUSAP1/AXIN2/BIRC5/RCC1/MAD2L1/SYCP2/MAJIN/FANCD2/KIF4B/OIP5/SYCE3/CENPW/SGO2/ESCO2/BRIP1/HORMAD1/RCC2/C…
BP	GO:0010833	telomere maintenance via telomere lengthening	0.481199	1.69731	0.0248704	MAPK15/TERT/NEK2/AURKB/RAD51/DKC1/PIF1/SRC/SLX1A/CCT5/SLX1B/CCT6A/SMG5/DCLRE1B/NAT10/WRAP53/HSP90AB1/HSP90AA1/GAR1/CCT2/CCT3/SLX4/ATR/GNL3L/TELO2/FBXO4/PINX1/SMG7/RTEL1/DCP2/HNRNPA2B1/PARP1/PNKP/CTNNB1/EXOSC10/HNRNPU/MAPKAPK5/TCP1/MRE11/XRN1/XRCC5/PARN/ACD/CCT8/CCT7
BP	GO:0000725	recombinational repair	0.480652	1.83133	0.00951053	RECQL4/RAD54L/AUNIP/TONSL/GINS4/BRCA2/RAD51AP1/XRCC2/BLM/CDC45/RAD51/FANCB/MCM4/CGAS/MCM2/TIMELESS/POLQ/RAD54B/RAD54B/CHEK1/RAD21L1/CCDC155/MMS22L/MCM8/MCM7/RMI2/GINS2/CDC7/FEN1/REC8/GEN1/H2AX/BRCA1/MEIOB/SLX1A/AP5Z1/RFWD3/PARPBP/MCM3/MCMDC2/MCM5/SLX1B/MCM6/HELB/POLN/XRCC3/FIGNL1/RAD51D/RBBP8/MAD2L2/PSMD14/RMI1/WRAP53/RPA4/SLX4/SHLD1/RTEL1/PARP1/KDM1A/SIRT6/PALB2/PPP4C/NABP2/AP5S1/FIGNL2/RPA3/SEM…
MF	GO:0003777	microtubule motor activity	0.47979	1.70103	0.023094	KIF2B/DNAH2/KIF14/KIF4A/KIF12/KIF18B/KIF26B/KIF2C/KIF23/DNAH5/KIF18A/CENPE/KIF20A/KIF15/KIFC1/DNAH3/KIF24/KIF11/KIF4B/KIF26A/WDR34/KIF20B/KIF22/KIF21B/DNAH12/DNAH14/KIFC2/DNAH6/KIF25/KIF3B
BP	GO:0000724	double-strand break repair via homologous recombination	0.479736	1.82537	0.00951053	RECQL4/RAD54L/AUNIP/TONSL/GINS4/BRCA2/RAD51AP1/XRCC2/BLM/CDC45/RAD51/FANCB/MCM4/CGAS/MCM2/TIMELESS/POLQ/RAD54B/RAD54B/CHEK1/RAD21L1/CCDC155/MMS22L/MCM8/MCM7/RMI2/GINS2/CDC7/FEN1/REC8/GEN1/H2AX/BRCA1/MEIOB/SLX1A/AP5Z1/RFWD3/PARPBP/MCM3/MCMDC2/MCM5/SLX1B/MCM6/HELB/POLN/XRCC3/FIGNL1/RAD51D/RBBP8/MAD2L2/PSMD14/RMI1/WRAP53/RPA4/SLX4/SHLD1/RTEL1/PARP1/KDM1A/SIRT6/PALB2/PPP4C/NABP2/AP5S1/FIGNL2/RPA3/SEM…
BP	GO:0007292	female gamete generation	0.478185	1.82475	0.00951053	CGB3/SOHLH1/STRA8/NOBOX/BMP15/AMH/TDRD5/MEIKIN/LGR5/TOP2A/M1AP/AFP/INHBA/TRIP13/PABPC1L/YBX2/CDC25B/AURKA/NCAPH/PLK1/ASPM/INHBB/CGB7/BRCA2/TTK/SYCP2/MDK/ZP3/HORMAD1/NPM2/CCNB1/CCDC155/IHH/FOSL1/TUBB8/MCM8/FSHB/REC8/SRC/SPIRE2/MASTL/MEIOB/PIWIL2/MCMDC2/FBXO5/DMRT1
BP	GO:0065004	protein-DNA complex assembly	0.478139	1.95279	0.00951053	H2BW1/H2BW2/H3C12/H1-6/HJURP/CENPF/H4C7/CENPI/H1-8/KNL1/CENPA/H2BC17/SOX9/CENPE/HNF1B/HELLS/CDT1/H3C15/CDC45/RAD51/MCM4/CENPO/ASF1B/MCM2/H3C10/H3C8/H3C11/H2BC3/OIP5/CENPW/H2BC9/H2BC15/CENPL/H4C12/H4C14/H2BC18/CENPN/H2BC14/CHAF1A/CENPU/MCM7/H2BC11/CENPK/CHAF1B/H1-5/H4C13/H2AX/CENPM/H2BC13/H4C1/H1-3/SOX12/H4C8/MCM3/H2BU1/H4C15/H4C4/CENPH/MCMDC2/H3-4/H2BC5/H2BC8/MCM5/H3C4/IPO4/MCM6/H4C6/H4C9/CENPS/H…
BP	GO:0032481	positive regulation of type I interferon production	0.477392	1.67133	0.0326454	MMP12/CGAS/IRAK1/STAT1/RIPK2/TRIM15/TLR2/PRKDC/HSPD1/IFIH1/NFKB2/IRF3/POLR1C/IRF7/IRF1/IRF5/POLR3A/POLR3K/HMGB2/POLR3G/DHX33/POLR2H/CTNNB1/SYK/DDX58/TLR8/ZCCHC3/STING1/MYD88/CRCP/POLR3F/PTPN22/POLR3E/FLOT1/CHUK/DHX58/DHX9/POLR3D/MRE11/XRCC5/MAVS/CD14/NFKB1/PQBP1/TBK1/POLR2K/ZBP1/HMGB1/DDX41/POLR3H
BP	GO:0007492	endoderm development	0.475988	1.66321	0.0375849	HOXC11/COL11A1/HMGA2/MMP8/LHX1/INHBA/APELA/LAMA3/ONECUT1/MMP9/LAMB3/HNF1B/FGF8/POU5F1/MMP14/EOMES/COL5A2/DKK1/COL5A1/ITGB2/BMP4
BP	GO:0006278	RNA-dependent DNA biosynthetic process	0.475703	1.64044	0.0441845	MAPK15/TERT/NEK2/AURKB/DKC1/PIF1/SRC/CCT5/CCT6A/SMG5/NAT10/WRAP53/HSP90AB1/HSP90AA1/GAR1/CCT2/CCT3/ATR/GNL3L/TELO2/FBXO4/PINX1/SMG7/DCP2/PNKP/CTNNB1/EXOSC10/PPIA/HNRNPU/MAPKAPK5/TCP1/MRE11/XRN1/XRCC5/PARN/TEP1/ACD/CCT8/CCT7/CCT4/TNKS
BP	GO:0031047	gene silencing by RNA	0.474887	1.87245	0.00951053	PIWIL1/TRIM71/H3C12/TERT/DDX4/MAEL/LIN28B/HENMT1/H3C15/PIWIL3/H3C10/POU5F1/H3C8/H3C11/H4C12/H4C14/MYCN/NDC1/H4C13/NUP210/TDRD1/PIWIL2/H4C1/H4C8/BMP4/XPO5/H4C15/H4C4/NUP155/H3C4/ERI1/H4C6/H4C9/ZNFX1/TDRKH/NUP62/NUP188/NUP107/CNOT11/ADAR/MOV10/H4C2/PIWIL4/NUP43/H4C5/AJUBA/AGO2/NOTCH4/RAE1/SPOUT1/TP53/SRRT/CNOT9/H3C7/NUP58/EGFR/EIF6/CNOT3/NUP37/HNRNPA2B1/NCOR2/NUP85/H3C14/H3C13/SEH1L/NUP50/DROSHA/NU…
BP	GO:0007052	mitotic spindle organization	0.474843	1.7457	0.0140738	TPX2/MYBL2/KIF4A/STIL/NEK2/KIF23/WDR62/NUF2/AURKA/PLK1/NDC80/CENPE/PRC1/CDC20/AURKB/KIFC1/TACC3/TTK/SPC25/BIRC5/RCC1/KIF11/KIF4B/BORA/POC1A/CCNB1/PSRC1/CHEK2/MZT1/MISP/STMN1
BP	GO:0140013	meiotic nuclear division	0.474807	1.86244	0.00951053	CCNE1/MAPK15/LIF/MEIKIN/TOP2A/M1AP/DDX4/MAEL/TRIP13/TEX19/BUB1/EME1/NUF2/CDC25B/RAD54L/BUB1B/FBXO43/FANCA/SGO1/AURKA/KIF18A/NCAPH/PLK1/ASPM/BRCA2/CDC20/MSH5/RAD51/MSX2/TTK/PRDM9/P3H4/SYCP2/MAJIN/FANCD2/MND1/RAD54B/SYCE3/RAD54B/SGO2/BRIP1/HORMAD1/NPM2/RAD21L1/CKS2/CCDC155/TUBB8/NDC1/REC8/SPIRE2/MASTL/MEIOB/SMC2/PIWIL2/PTTG1/MCMDC2/FBXO5/DMRT1/DMRTC2/SYCP1/GPR3/CCNE2/CENPS/TDRKH/EREG/FIGNL1/MSX1/RA…
BP	GO:0060964	regulation of gene silencing by miRNA	0.47414	1.75439	0.0140738	TRIM71/H3C12/MAEL/H3C15/H3C10/POU5F1/H3C8/H3C11/H4C12/H4C14/MYCN/NDC1/H4C13/NUP210/H4C1/H4C8/BMP4/H4C15/H4C4/NUP155/H3C4/H4C6/H4C9/NUP62/NUP188/NUP107/H4C2/NUP43/H4C5/AJUBA/AGO2/RAE1/TP53/H3C7/NUP58/EGFR/NUP37/NCOR2/NUP85/H3C14/H3C13/SEH1L/NUP50/NUP205/NUP160/ZC3H12A/NUP93/POLR2H/POM121C/FMR1/POM121/POLR2D/H4C11/LIN28A/PPP3CA/PPARG
BP	GO:2001251	negative regulation of chromosome organization	0.474	1.8201	0.00951053	EZHIP/TOP2A/H1-6/TRIP13/DNMT3B/CENPF/BUB1/BUB1B/H1-8/PLK1/NDC80/CDC20/AURKB/ATAD2/CDT1/FOXP3/TTK/UCN/MAD2L1/MCM2/CCNB1/HMGA1/PIF1/H1-5/SRC/GEN1/DNMT1/BRCA1/SLX1A/PTTG1/H1-3/PAX5/FBXO5/AICDA/SPDL1/SLX1B/NOC2L/MAD1L1/XRCC3/BUB3/SPI1/MAD2L2/NAT10/SET/CTBP1/NAA10/SLX4/H1-2/GNL3L/PINX1/USP17L2/RTEL1/DCP2/H1-4/PARP1/KDM1A/MTF2/SPHK2
BP	GO:0000079	regulation of cyclin-dependent protein serine/threonine kinase activity	0.473638	1.71697	0.0179505	CCNE1/CNTD2/CDKN2A/PKMYT1/CDC6/PROX1/PLK1/CDC25C/CDKN3/CDC25A/BLM/CCNF/CCNB2/CEBPA/CCNA2/CCNI2/CCNB1/CKS2/CCND1/PSRC1/GTPBP4/SRC/CKS1B/PDGFB/TFAP4/CCNJ/CCNO/CCNE2/HHEX
BP	GO:0007088	regulation of mitotic nuclear division	0.473579	1.85027	0.00951053	UBE2C/TRIP13/PKMYT1/CDC6/MKI67/NEK2/CENPF/BUB1/CDCA5/EGF/ANLN/BUB1B/AURKA/PLK1/CDC25C/NDC80/CENPE/CDC20/FGF8/AURKB/TACC3/CDT1/DLGAP5/TTK/MTBP/NUSAP1/RCC1/MAD2L1/KIF11/BORA/CHEK1/NPM2/CCNB1/IGF2/KNTC1/KIF20B/GEN1/PDGFB/PTTG1/BMP4/PDGFRB/NEK6/CEP85/FBXO5/DMRT1/LRP5/SPHK1/SPDL1/KIF25/MAD1L1/NUP62/EREG/XRCC3/BUB3/EDN1/PPP1R9B/MAD2L2
CC	GO:0072686	mitotic spindle	0.47357	1.75228	0.0140738	KIF2B/DCDC2/TPX2/KIF18B/KIF23/CDK1/SPAG5/ECT2/AURKA/KIF18A/SKA1/CKAP2L/ASPM/CENPE/AURKB/PKHD1/KIFC1/TACC3/NUSAP1/MAD2L1/KIF11/RCC2/KNSTRN/KIF20B/CDC7/KIF22/MISP/KAT2A/EML4/RANGAP1/ATAT1/MAD1L1/NUP62/RACGAP1/PKP4/CTTN/RAE1/SPOUT1/SMC1A/MAP11/KDF1/CAPG/MAK/EFHC1/HSF1
BP	GO:0060993	kidney morphogenesis	0.473164	1.70674	0.0229282	PAX2/HOXA11/CALB1/FOXJ1/HOXD11/LHX1/LIF/WNT11/SIX1/KIF26B/AGT/SOX4/PAX8/SOX9/HNF1B/FGF8/SIX4/GATA3/FOXD1/STAT1/HOXB7/PGF/SOX8/GCNT3/BMP4/PDGFRB/FMN1/IRX2/WNT7B
BP	GO:0072028	nephron morphogenesis	0.472441	1.654	0.0375849	PAX2/HOXA11/HOXD11/LHX1/LIF/WNT11/SIX1/KIF26B/AGT/PAX8/SOX9/HNF1B/FGF8/SIX4/GATA3/FOXD1/STAT1/HOXB7/PGF/SOX8/BMP4/PDGFRB/FMN1/IRX2
BP	GO:0007093	mitotic cell cycle checkpoint	0.472358	1.84618	0.00951053	HMGA2/TOP2A/TRIP13/CDC6/CLSPN/CENPF/GTSE1/E2F1/BUB1/EME1/E2F7/CDK1/SOX4/BUB1B/AURKA/PLK1/CDC25C/NDC80/CDC20/AURKB/BLM/CDT1/ZWINT/TTK/ORC1/MAD2L1/ZWILCH/CCNB1/KNTC1/PCNA/CCND1/ARID3A/CHEK2/TICRR/GEN1/PRKDC/BRCA1/BCL2L1/RFWD3/SPDL1/DONSON/CASP2/MAD1L1/RAD9A/MUC1/XRCC3/BUB3/DCLRE1B/MSH2/CNOT11/TIPIN/MAD2L2/TOPBP1/MDM2/E2F8/BAX/CDK5RAP3/TP53/CDK2/CNOT9/PML/USP17L2/CNOT3/PIDD1
BP	GO:0000726	non-recombinational repair	0.47219	1.70598	0.0213434	HMGA2/AUNIP/POLQ/H4C12/H4C14/NSD2/H4C13/PRKDC/H2AX/BRCA1/SLX1A/H4C1/H4C8/H4C15/H4C4/DTX3L/H3-4/SLX1B/H4C6/H4C9/PARP9/PAXX/DCLRE1B/RBBP8/DCLRE1A/DCLRE1C/MAD2L2/H4C2/PSMD14/WRAP53/H4C5/REXO4/SLX4/SHLD1/POLA1/HSF1/MDC1/POLB/PRPF19/PAXIP1/H4C11/BARD1/RIF1/NBN/KDM2A/BRCC3/LIG3/MRE11/XRCC4/XRCC5/POLM/XRCC1/H4C3
BP	GO:1903046	meiotic cell cycle process	0.472138	1.87296	0.00951053	CCNE1/MAPK15/LIF/MEIKIN/TOP2A/M1AP/DDX4/MAEL/TRIP13/TEX19/BUB1/EME1/NUF2/CDC25B/RAD54L/BUB1B/FBXO43/FANCA/SGO1/AURKA/KIF18A/NCAPH/PLK1/ASPM/CDC25C/BRCA2/CDC20/CDC25A/MSH5/RAD51/MSX2/TTK/PRDM9/P3H4/SYCP2/MAJIN/FANCD2/MND1/RAD54B/SYCE3/RAD54B/SGO2/BRIP1/HORMAD1/NPM2/RAD21L1/CKS2/CCDC155/TUBB8/NDC1/REC8/NSUN2/SPIRE2/MASTL/NCAPD2/MEIOB/SMC2/NCAPD3/PIWIL2/PTTG1/MCMDC2/FBXO5/DMRT1/DMRTC2/SYCP1/GPR3/CCN…
BP	GO:0044774	mitotic DNA integrity checkpoint	0.471526	1.73351	0.0140738	HMGA2/TOP2A/CDC6/CLSPN/GTSE1/E2F1/EME1/E2F7/CDK1/SOX4/AURKA/CDC25C/BLM/ORC1/CCNB1/PCNA/CCND1/ARID3A/CHEK2/TICRR/PRKDC/RFWD3/DONSON/CASP2/RAD9A/MUC1/MSH2/CNOT11/TIPIN/TOPBP1/MDM2/E2F8/BAX/CDK5RAP3/TP53/CDK2/CNOT9/PML/CNOT3/PIDD1
BP	GO:0000075	cell cycle checkpoint	0.469419	1.89436	0.00951053	HMGA2/TOP2A/TRIP13/CDC6/CLSPN/CENPF/GTSE1/E2F1/BUB1/EME1/E2F7/CDK1/SOX4/PROX1/BUB1B/AURKA/PLK1/CDC25C/NDC80/CDC20/AURKB/DTL/DNA2/BLM/CDT1/ZWINT/CDC45/TTK/ORC1/MAD2L1/TIMELESS/BRIP1/HORMAD1/ZWILCH/CHEK1/CCNB1/KNTC1/PCNA/CCND1/ARID3A/CHEK2/TICRR/NSUN2/GEN1/PRKDC/H2AX/BRCA1/BCL2L1/RFWD3/SPDL1/DONSON/FBXO6/CASP2/MAD1L1/RAD9A/MUC1/XRCC3/BUB3/DCLRE1B/MSH2/CNOT11/TIPIN/MAD2L2/TOPBP1/MDM2/E2F8/BAX/RPA4/C…
BP	GO:0072088	nephron epithelium morphogenesis	0.469338	1.6379	0.0439944	PAX2/HOXA11/HOXD11/LHX1/LIF/WNT11/SIX1/KIF26B/AGT/PAX8/SOX9/HNF1B/FGF8/SIX4/GATA3/FOXD1/STAT1/HOXB7/PGF/SOX8/BMP4/FMN1/IRX2
BP	GO:0000280	nuclear division	0.468486	2.01379	0.00951053	CCNE1/MAPK15/LIF/MEIKIN/TOP2A/M1AP/DDX4/KIF14/UBE2C/MAEL/TPX2/TRIP13/MYBL2/KIF4A/KIF18B/PKMYT1/CDC6/TEX19/MKI67/NEK2/CENPF/KIF2C/KIF23/BUB1/EME1/CDCA5/NUF2/EGF/CDC25B/RAD54L/SPAG5/ANLN/BUB1B/FBXO43/FANCA/SGO1/AURKA/KIF18A/NCAPH/PLK1/CDCA8/ASPM/CDC25C/DSCC1/NDC80/CENPE/PRC1/BRCA2/CDC20/FGF8/AURKB/HASPIN/KIFC1/MSH5/TACC3/CDT1/DLGAP5/ZWINT/RAD51/MSX2/NCAPG/TTK/PRDM9/MTBP/P3H4/NUSAP1/BIRC5/RCC1/MAD2L…
BP	GO:0006342	chromatin silencing	0.468013	1.7395	0.00951053	H3C12/H1-6/H1-8/ATAD2/HELLS/H3C15/CDC45/MBD3L1/H3C10/H3C8/H3C11/H4C12/H4C14/HMGA1/SUV39H1/EZH2/H1-5/H4C13/DNMT1/H4C1/H1-3/H4C8/H4C15/H4C4/AICDA/H3C4/H4C6/H4C9/ZNFX1/NAA40/HDAC1/MORC2/H4C2/TRIM28/H4C5/HIRA/PCGF2/CTBP1/DOT1L/H3C7/H1-2/BEND3/H1-4/H3C14/H3C13/SIRT6/RESF1/HDAC2/H1-1/KMT2D/SETDB1/POLE3/H4C11
BP	GO:0006303	double-strand break repair via nonhomologous end joining	0.467598	1.66641	0.0294235	HMGA2/AUNIP/POLQ/H4C12/H4C14/NSD2/H4C13/PRKDC/H2AX/BRCA1/H4C1/H4C8/H4C15/H4C4/DTX3L/H3-4/H4C6/H4C9/PARP9/PAXX/DCLRE1B/DCLRE1A/DCLRE1C/MAD2L2/H4C2/PSMD14/WRAP53/H4C5/SHLD1/POLA1/HSF1/MDC1/POLB/PRPF19/PAXIP1/H4C11/BARD1/RIF1/NBN/KDM2A/BRCC3/LIG3/MRE11/XRCC4/XRCC5/POLM/XRCC1/H4C3
BP	GO:0051783	regulation of nuclear division	0.466562	1.85084	0.00951053	MAPK15/LIF/UBE2C/TRIP13/PKMYT1/CDC6/MKI67/NEK2/CENPF/BUB1/CDCA5/EGF/ANLN/BUB1B/FBXO43/AURKA/PLK1/CDC25C/NDC80/CENPE/CDC20/FGF8/AURKB/TACC3/CDT1/DLGAP5/MSX2/TTK/PRDM9/MTBP/NUSAP1/RCC1/MAD2L1/KIF11/BORA/HORMAD1/CHEK1/NPM2/CCNB1/IGF2/KNTC1/KIF20B/GEN1/PDGFB/PIWIL2/PTTG1/BMP4/PDGFRB/NEK6/CEP85/FBXO5/DMRT1/LRP5/SPHK1/SPDL1/KIF25/GPR3/MAD1L1/NUP62/EREG/XRCC3/MSX1/BUB3/EDN1/PPP1R9B/MAD2L2
BP	GO:1904029	regulation of cyclin-dependent protein kinase activity	0.466458	1.70324	0.0160342	CCNE1/CNTD2/CDKN2A/PKMYT1/CDC6/PROX1/PLK1/CDC25C/CDKN3/CDC25A/BLM/CCNF/CCNB2/CEBPA/CCNA2/CCNI2/CCNB1/CKS2/CCND1/PSRC1/GTPBP4/SRC/CKS1B/PDGFB/TFAP4/CCNJ/CCNO/CAMK2N1/CCNE2/HHEX
MF	GO:0004527	exonuclease activity	0.465272	1.63975	0.032523	PNLDC1/EXO1/POLD1/FEN1/GEN1/MEIOB/MGME1/ERI1/PNPT1/EXOSC5/EXOSC4/RAD9A/POLE/DCLRE1B/APEX2/AEN/DCLRE1A/DCLRE1C/REXO4/XRN2/REXO5/ISG20L2/DCP2/CPSF3/RAD1/USB1/ZC3H12A/DCPS/REXO1/TDP1/EXOSC9/EXOSC10/EXOSC2/APTX/CNOT2/WRN/DIS3/DXO/APEX1/TOE1/MRE11/XRN1/PARN/TATDN1/EXD3/EXOSC3/POLG/CNOT6/PAN3/ERI3/ERI2/ENPP1/CNOT7/ENDOG/EXO5/NOCT/ANGEL1
BP	GO:0006399	tRNA metabolic process	0.464865	1.85014	0.00951053	WARS1/RPP25/POP1/NSUN2/TRMT6/PUS7/DARS2/PUS1/VARS1/SLFN13/METTL1/SEPHS2/PRORP/LAGE3/ADAT2/PTCD1/TRMU/WDR4/TSEN54/CPSF1/TARBP1/CTU1/ADAT1/MARS2/YARS1/NARS2/GARS1/CSTF2/QTRT2/NAT10/TRMT2B/POP4/TRMT1/CDK5RAP1/FTSJ1/ADAT3/POLR3K/MOCS3/PUSL1/GTF3C5/RPP38/FARSA/RPP40/PPA1/TARS1/DUS1L/CTU2/DUS4L/NSUN6/AARS1/SARS2/SEPHS1/SSB/TARS2/EPRS1/EARS2/GTPBP3/TRMT61A/TP53RK/CARS1/AIMP2/EEF1E1/GTF3C2/PARS2/ELP1/EXO…
BP	GO:0035194	posttranscriptional gene silencing by RNA	0.462106	1.78734	0.00951053	TRIM71/H3C12/TERT/MAEL/LIN28B/HENMT1/H3C15/H3C10/POU5F1/H3C8/H3C11/H4C12/H4C14/MYCN/NDC1/H4C13/NUP210/H4C1/H4C8/BMP4/XPO5/H4C15/H4C4/NUP155/H3C4/H4C6/H4C9/NUP62/NUP188/NUP107/ADAR/MOV10/H4C2/NUP43/H4C5/AJUBA/AGO2/NOTCH4/RAE1/SPOUT1/TP53/SRRT/H3C7/NUP58/EGFR/EIF6/NUP37/HNRNPA2B1/NCOR2/NUP85/H3C14/H3C13/SEH1L/NUP50/DROSHA/NUP205/NUP160/ZC3H12A/NUP93/TSN/POLR2H/POM121C/FMR1/POM121/POLR2D/H4C11/SMAD3…
BP	GO:0061982	meiosis I cell cycle process	0.461964	1.72913	0.0122296	CCNE1/MAPK15/MEIKIN/TOP2A/M1AP/DDX4/MAEL/TRIP13/TEX19/EME1/CDC25B/RAD54L/AURKA/PLK1/CDC25C/BRCA2/CDC25A/MSH5/RAD51/PRDM9/P3H4/SYCP2/MAJIN/FANCD2/MND1/RAD54B/SYCE3/RAD54B/BRIP1/HORMAD1/RAD21L1/CKS2/CCDC155/NDC1/REC8/MEIOB/PIWIL2/PTTG1/MCMDC2/FBXO5/DMRT1/DMRTC2/SYCP1/CCNE2/CENPS
BP	GO:0034470	ncRNA processing	0.461811	1.97211	0.00951053	SAGE1/CT45A1/CT45A10/CT45A5/LIN28B/CT45A3/CT45A10/RPP25/BOP1/NOP2/POP1/BYSL/DKC1/SUV39H1/DCAF13/CHD7/RRP9/GTPBP4/NSUN2/LYAR/RNF113B/TRMT6/NOL6/MRM1/PUS7/DDX27/PUS1/NPM3/DDX21/RRS1/NOP56/METTL1/PDCD11/SEPHS2/MRTO4/PRORP/ESF1/DHX37/UTP14A/ERI1/LAGE3/EXOSC5/ADAT2/NOP58/PTCD1/TRMU/EXOSC4/WDR4/TSEN54/BUD23/CPSF1/HEATR1/TARBP1/NSUN5/CTU1/INTS8/DDX54/ADAT1/NOC4L/WDR12/DDX56/ADAR/NOP14/WDR43/PES1/UTP25/C…
BP	GO:0016441	posttranscriptional gene silencing	0.460087	1.78119	0.00951053	TRIM71/H3C12/TERT/MAEL/LIN28B/HENMT1/H3C15/H3C10/POU5F1/H3C8/H3C11/H4C12/H4C14/MYCN/NDC1/H4C13/NUP210/H4C1/H4C8/BMP4/XPO5/H4C15/H4C4/NUP155/H3C4/H4C6/H4C9/NUP62/NUP188/NUP107/ADAR/MOV10/H4C2/NUP43/H4C5/AJUBA/AGO2/NOTCH4/RAE1/SPOUT1/TP53/SRRT/H3C7/NUP58/EGFR/EIF6/NUP37/HNRNPA2B1/NCOR2/NUP85/H3C14/H3C13/SEH1L/NUP50/DROSHA/NUP205/NUP160/ZC3H12A/NUP93/TSN/POLR2H/POM121C/FMR1/POM121/POLR2D/H4C11/SMAD3…
BP	GO:0035195	gene silencing by miRNA	0.459505	1.76444	0.00951053	TRIM71/H3C12/MAEL/LIN28B/H3C15/H3C10/POU5F1/H3C8/H3C11/H4C12/H4C14/MYCN/NDC1/H4C13/NUP210/H4C1/H4C8/BMP4/XPO5/H4C15/H4C4/NUP155/H3C4/H4C6/H4C9/NUP62/NUP188/NUP107/ADAR/MOV10/H4C2/NUP43/H4C5/AJUBA/AGO2/NOTCH4/RAE1/SPOUT1/TP53/SRRT/H3C7/NUP58/EGFR/EIF6/NUP37/HNRNPA2B1/NCOR2/NUP85/H3C14/H3C13/SEH1L/NUP50/DROSHA/NUP205/NUP160/ZC3H12A/NUP93/POLR2H/POM121C/FMR1/POM121/POLR2D/H4C11/SMAD3/LIN28A/PPP3CA/P…
BP	GO:0031570	DNA integrity checkpoint	0.457245	1.7754	0.00951053	HMGA2/TOP2A/CDC6/CLSPN/GTSE1/E2F1/EME1/E2F7/CDK1/SOX4/AURKA/PLK1/CDC25C/DTL/DNA2/BLM/CDT1/CDC45/ORC1/TIMELESS/BRIP1/CHEK1/CCNB1/PCNA/CCND1/ARID3A/CHEK2/TICRR/PRKDC/H2AX/BRCA1/RFWD3/DONSON/FBXO6/CASP2/RAD9A/MUC1/MSH2/CNOT11/TIPIN/TOPBP1/MDM2/E2F8/BAX/RPA4/CDK5RAP3/TP53/CDK2/DOT1L/CNOT9/ATR/PML/WDR76/FBXO4/INTS7/CNOT3/PIDD1
BP	GO:0031145	anaphase-promoting complex-dependent catabolic process	0.456752	1.61108	0.0498585	UBE2C/CDK1/BUB1B/AURKA/PLK1/CDC20/AURKB/MAD2L1/PSMD3/UBE2S/CCNB1/PTTG1/FBXO5/PSMB9/BUB3/PSMD11/PSMB8/PSMB2/PSMC4/PSMD14/PSMD1/CDK2/PSME3/PSMF1/PSME4/PSMA7/PSMA4/PSMB4/ANAPC1/PSME2/PSMB3/PSMD13/PSMB7/PSMA5/ANAPC2/PSMD2/FZR1/PSMD12/PSMA1/PSMD5/PSMC2/PSMA3/PSMA2/UBE2D1/ANAPC5/PSMB5/PSMB1/PSMD4/PSMD7
BP	GO:0050907	detection of chemical stimulus involved in sensory perception	0.455698	1.968	0.00951053	CST1/OR56A3/CST4/OR8A1/OR5M11/OR8K5/OR8B12/OR2A12/OR13H1/CST2/OR10G2/OR2B6/TAS2R38/PIP/OR2G2/OR5P3/OR1Q1/OR6C70/OR11G2/OR2F2/OR8D1/OR9A4/OR5V1/OR6C2/OR10Q1/OR1G1/OR14I1/OR6A2/OR52E6/PKD2L1/CA6/OR8G5/TAS2R8/OR8K1/OR4F21/OR2A14/OR10K1/OR5AU1/OR1L1/OR4B1/OR9A2/OR4C12/OR4C5/TAS2R60/OR5AN1/OR52K2/OR52W1/OR11H6/OR4F6/OR2T11/OR1J1/LPO/OR52N2/TAS2R16/OR14A16/OR10D3/OR8G1/OR8D2/OR7A17/OR2A2/OR10H1/OR1J4/O…
BP	GO:0019724	B cell mediated immunity	0.454472	1.70109	0.0122296	C4BPA/CRP/FOXJ1/C8B/CD70/APCS/EXO1/C2/C9/FOXP3/C8A/C4BPB/IL13RA2/ZP3/NECTIN2/ATAD5/NSD2/BATF/GCNT3/HSPD1/C4A/C3/TCIRG1/INPP5D/TNFSF4/HLA-DQB1/MBL2/C4B/AICDA/IL27RA/CD55/CR2/FCER1G/FCER2/HLA-G/HPX/MSH2/CLCF1/TBX21/TFRC/MAD2L2/IRF7/CD74/C1QB
BP	GO:0032508	DNA duplex unwinding	0.453296	1.67348	0.0178645	TOP2A/RECQL4/GINS1/DSCC1/GINS4/ERCC6L/DNA2/BLM/CDC45/RAD51/CHTF18/MCM4/MCM2/POLQ/RAD54B/RAD54B/BRIP1/RFC3/HMGA1/DDX11/MCM8/MCM7/PIF1/CHD7/TWNK/GINS2/MCM3/RAD18/MCM5/ACTR5/MCM6/HELB/RFC4
BP	GO:0045132	meiotic chromosome segregation	0.451036	1.61571	0.0458803	CCNE1/MAPK15/MEIKIN/TOP2A/M1AP/MAEL/TRIP13/BUB1/EME1/NUF2/BUB1B/SGO1/NCAPH/PLK1/TTK/P3H4/SYCP2/MAJIN/FANCD2/SYCE3/SGO2/BRIP1/HORMAD1/RAD21L1/CCDC155/NDC1/REC8/MEIOB/SMC2/PTTG1/MCMDC2/SYCP1/CCNE2/CENPS
BP	GO:0001843	neural tube closure	0.450574	1.6167	0.0387094	PAX2/SALL4/TRIM71/CTHRC1/ALX1/STIL/LRP2/MTHFD1L/LHX2/PTK7/KIF20B/ST14/SPINT2/FZD6/CELSR1/KAT2A/BMP4/SDC4/SCRIB/FZD2
BP	GO:0007608	sensory perception of smell	0.448988	1.92966	0.00951053	OBP2B/OR56A3/OR8A1/SLC6A3/OR5M11/OR8K5/OR8B12/OR2A12/OR13H1/OR10G2/UGT2A1/OR2B6/OR2G2/OR5P3/OBP2A/OR1Q1/OR6C70/OR11G2/OR2F2/OR8D1/GJB4/OR9A4/OR5V1/DRD2/OR6C2/OR10Q1/OR1G1/OR14I1/OR6A2/OR52E6/OR8G5/OR8K1/OR4F21/OR2A14/OR10K1/OR5AU1/OR1L1/OR4B1/OR9A2/OR4C12/GFY/OR4C5/OR5AN1/OR52K2/OR52W1/OR11H6/OR4F6/OR2T11/OR1J1/OMP/OR52N2/OR14A16/OR10D3/OR8G1/OR8D2/OR7A17/OR2A2/OR10H1/OR1J4/OR6V1/OR2T8/OR52E4/OR5…
CC	GO:0005875	microtubule associated complex	0.447763	1.72856	0.00951053	ACTL8/KIF2B/DNAH2/KIF14/RP1/KIF4A/KIF12/KIF18B/KIF26B/KIF2C/KIF23/DNAH5/AURKA/KIF18A/LRP8/CCDC114/CDCA8/CENPE/TRIM54/KIF20A/AURKB/KIF15/KIFC1/DNAH3/KIF24/BIRC5/KIF11/KIF4B/KIF26A/WDR34/KIF20B/DRC1/KIF22/KIF21B/DNAH12/DNAH14/KIFC2/DNAH6/HAUS7/MAP7/KIF25/KIF3B
BP	GO:0008033	tRNA processing	0.447742	1.6957	0.0140738	RPP25/POP1/NSUN2/TRMT6/PUS7/PUS1/METTL1/SEPHS2/PRORP/LAGE3/ADAT2/PTCD1/TRMU/WDR4/TSEN54/CPSF1/TARBP1/CTU1/ADAT1/CSTF2/QTRT2/NAT10/TRMT2B/POP4/TRMT1/CDK5RAP1/FTSJ1/ADAT3/POLR3K/MOCS3/PUSL1/RPP38/RPP40/DUS1L/CTU2/DUS4L/NSUN6/AARS1/SEPHS1/SSB/GTPBP3/TRMT61A/TP53RK/ELP1/KARS1/TYW1/URM1/POP7/THADA/CPSF4/TYW5/DUS3L/QTRT1/DUS2/AARS2/RPUSD4/TRUB1/CLP1/USP14/GRSF1/METTL2A/CDKAL1/TRMT12/ANKRD16/TSEN34/PUS3…
BP	GO:0032479	regulation of type I interferon production	0.445861	1.68248	0.0140738	ACOD1/MMP12/NLRC5/DTX4/CGAS/IRAK1/HAVCR2/STAT1/RIPK2/TRAIP/ISG15/TRIM15/TLR2/PRKDC/HSPD1/IFIH1/RELB/NFKB2/IRF3/PYCARD/NMI/POLR1C/IRF7/IRF1/SIRPA/LILRA4/IKBKE/IRF5/POLR3A/POLR3K/UBE2L6/HMGB2/POLR3G/TRAF3/DHX33/TRIM56/POLR2H/CTNNB1/TRIM21/NLRC3/SYK/LILRB1/DDX58/TLR8/ZCCHC3/STING1/MYD88/CRCP/TRAF3IP1/POLR3F/PTPN22/NPLOC4/POLR3E/FLOT1/CHUK/DHX58/DHX9/CACTIN/POLR3D/MRE11/GPATCH3/XRCC5/MAVS/UFD1/CD14/R…
BP	GO:0031123	RNA 3'-end processing	0.445708	1.72084	0.00951053	SAGE1/CT45A1/CT45A10/CT45A5/LIN28B/PABPC1L/CT45A3/CT45A10/CCNB1/DKC1/DDX39A/ZC3H3/THOC2/CPSF4L/ERI1/PNPT1/EXOSC5/PTCD1/EXOSC4/CPSF1/INTS8/UPF3B/ZNF473/CSTF2/INTS1/THOC6/POLR3K/TUT1/INTS7/U2AF2/MTPAP/SLBP/SYMPK/HSF1/PABPN1/SNRPA/LEO1/INTS14/CPSF3/ALYREF/TENT4A/SSB/USB1/CSTF3/CSTF1/MAGOHB/FBL/RNF40/SRSF1/RPRD1B/POLR2D/EXOSC9/EXOSC10/BARD1/CPSF6/LIN28A/CPSF4/EXOSC2/RNPS1/MAGOH/PABPC1/SRSF11/NCBP1/EX…
BP	GO:0032606	type I interferon production	0.445671	1.68514	0.0140738	ACOD1/MMP12/NLRC5/DTX4/CGAS/IRAK1/HAVCR2/STAT1/RIPK2/TRAIP/ISG15/TRIM15/TLR2/PRKDC/HSPD1/IFIH1/RELB/NFKB2/IRF3/PYCARD/NMI/POLR1C/IRF7/IRF1/SIRPA/LILRA4/IKBKE/IRF5/POLR3A/POLR3K/UBE2L6/HMGB2/POLR3G/TRAF3/DHX33/TRIM56/POLR2H/CTNNB1/TRIM21/NLRC3/SYK/LILRB1/DDX58/TLR8/ZCCHC3/STING1/MYD88/CRCP/TRAF3IP1/POLR3F/PTPN22/NPLOC4/POLR3E/FLOT1/CHUK/DHX58/DHX9/CACTIN/POLR3D/G3BP1/MRE11/GPATCH3/XRCC5/MAVS/UFD1/…
BP	GO:0016064	immunoglobulin mediated immune response	0.445591	1.66171	0.0193084	C4BPA/CRP/FOXJ1/C8B/APCS/EXO1/C2/C9/FOXP3/C8A/C4BPB/IL13RA2/ZP3/NECTIN2/ATAD5/NSD2/BATF/GCNT3/HSPD1/C4A/C3/TCIRG1/INPP5D/TNFSF4/HLA-DQB1/MBL2/C4B/AICDA/IL27RA/CD55/CR2/FCER1G/FCER2/HPX/MSH2/CLCF1/TBX21/TFRC/MAD2L2/IRF7/CD74/C1QB
BP	GO:0071824	protein-DNA complex subunit organization	0.445245	1.84675	0.00951053	PIWIL1/H2BW1/H2BW2/H3C12/H1-6/HJURP/CENPF/H4C7/CENPI/H1-8/KNL1/CENPA/H2BC17/SOX9/CENPE/HNF1B/HELLS/CDT1/H3C15/CDC45/RAD51/MCM4/CENPO/PRDM9/ASF1B/MCM2/H3C10/H3C8/H3C11/H2BC3/OIP5/CENPW/H2AW/H2BC9/H2BC15/CENPL/H4C12/H4C14/H2BC18/CENPN/H2BC14/CHAF1A/CENPU/HMGA1/MCM7/H2BC11/CENPK/CHAF1B/H1-5/NFE2/H4C13/H2AX/ANP32E/CENPM/H2BC13/H4C1/H1-3/SOX12/H4C8/MCM3/H2BU1/H4C15/H4C4/CENPH/MCMDC2/H3-4/H2BC5/H2BC8/M…
MF	GO:0004386	helicase activity	0.44518	1.73637	0.00951053	DDX4/RECQL4/RAD54L/GINS1/DSCC1/GINS4/HELZ2/ERCC6L/HELLS/DNA2/BLM/CDC45/RAD51/CHTF18/MCM4/MCM2/POLQ/RAD54B/RAD54B/BRIP1/RFC3/DDX11/MCM8/MCM7/PIF1/CHD7/TWNK/GINS2/DDX27/DHX34/DDX21/DDX39A/MCM3/IFIH1/RAD18/DDX60L/DDX53/MCM5/DDX31/DHX37/ACTR5/MCM6/HELB/RFC4/TTF2/DDX54/RUVBL1/DDX56/MOV10/DDX55/CHD1L/ASCC3/DDX10/WRNIP1/RTEL1/RUVBL2/SMARCA4/DHX15/DDX18/DDX47/DHX33/RFC2/RFC5/DQX1/SLFN11/SRCAP/ERCC2/SNRNP…
BP	GO:0032392	DNA geometric change	0.444732	1.6639	0.0159135	TOP2A/RECQL4/HMGB3/RAD54L/GINS1/DSCC1/GINS4/ERCC6L/DNA2/BLM/CDC45/RAD51/CHTF18/MCM4/MCM2/POLQ/RAD54B/RAD54B/BRIP1/RFC3/HMGA1/DDX11/MCM8/MCM7/PIF1/CHD7/TWNK/GINS2/MCM3/RAD18/MCM5/ACTR5/MCM6/HELB/RFC4
BP	GO:1903317	regulation of protein maturation	0.444365	1.66252	0.0159135	MAGEA3/CPN1/BIRC7/C4BPA/CFHR4/MELTF/NKD2/C8B/SERPINE1/ADAM8/SOX4/CFHR2/CD5L/C2/C9/C8A/C4BPB/F2/ASTL/MMP14/CFB/NLRP7/SERPINF2/SRC/BCL2L12/C4A/C3/C4B/CD55/CR2/RFX4/CTSZ/F12/C1QB/MDM2/CFHR5/XIAP/CPB2
BP	GO:0007606	sensory perception of chemical stimulus	0.443352	1.92898	0.00951053	CST1/OBP2B/OR56A3/CST4/OR8A1/SLC6A3/OR5M11/OR8K5/OR8B12/OR2A12/OR13H1/CST2/OR10G2/UGT2A1/OR2B6/TAS2R38/PIP/OR2G2/OR5P3/OBP2A/OR1Q1/OR6C70/OR11G2/OR2F2/OR8D1/GJB4/OR9A4/OR5V1/DRD2/OR6C2/OR10Q1/OR1G1/OR14I1/OR6A2/OR52E6/PKD2L1/CA6/OR8G5/TAS2R8/OR8K1/OR4F21/OR2A14/LCN1/OR10K1/OR5AU1/OR1L1/OR4B1/OR9A2/OR4C12/GFY/OR4C5/TAS2R60/OR5AN1/OR52K2/OR52W1/OR11H6/OR4F6/OR2T11/OR1J1/OMP/LPO/OR52N2/TAS2R16/OR14A…
BP	GO:0044773	mitotic DNA damage checkpoint	0.443114	1.60632	0.0386968	HMGA2/CLSPN/GTSE1/E2F1/EME1/E2F7/CDK1/SOX4/AURKA/CDC25C/BLM/CCNB1/PCNA/CCND1/ARID3A/CHEK2/PRKDC/RFWD3/DONSON/CASP2/RAD9A/MUC1/MSH2/CNOT11/TIPIN/MDM2/E2F8/BAX/CDK5RAP3/TP53/CDK2/CNOT9/PML/CNOT3/PIDD1
BP	GO:0050906	detection of stimulus involved in sensory perception	0.442925	1.9292	0.00951053	CST1/OR56A3/CST4/OR8A1/OR5M11/COL11A1/OR8K5/OR8B12/OR2A12/OR13H1/CST2/OR10G2/OR2B6/TAS2R38/PIP/OR2G2/OR5P3/OR1Q1/OR6C70/OR11G2/OR2F2/OR8D1/OR9A4/OR5V1/OR6C2/GJA10/NTSR1/OR10Q1/OR1G1/OR14I1/OR6A2/OR52E6/PKD2L1/CA6/OR8G5/TAS2R8/OR8K1/OR4F21/OR2A14/OR10K1/OR5AU1/OR1L1/OR4B1/OR9A2/OR4C12/OR4C5/ADGRV1/SEMA5B/TAS2R60/OR5AN1/OR52K2/OR52W1/TMC2/OR11H6/OR4F6/OR2T11/OR1J1/LPO/OR52N2/TAS2R16/OR14A16/OR10D3/…
BP	GO:0016458	gene silencing	0.442902	1.82811	0.00951053	PIWIL1/TRIM71/H3C12/TERT/H1-6/DDX4/MAEL/LIN28B/H1-8/ATAD2/HELLS/HENMT1/H3C15/CDC45/MBD3L1/PIWIL3/H3C10/POU5F1/H3C8/H3C11/H4C12/H4C14/MYCN/HMGA1/SUV39H1/EZH2/NDC1/H1-5/H4C13/NUP210/DNMT1/TDRD1/PIWIL2/H4C1/H1-3/H4C8/BMP4/XPO5/H4C15/H4C4/NUP155/AICDA/H3C4/ERI1/H4C6/H4C9/ZNFX1/TDRKH/NUP62/NAA40/NUP188/HDAC1/NUP107/CNOT11/ADAR/MORC2/MOV10/H4C2/PIWIL4/TRIM28/NUP43/H4C5/AJUBA/AGO2/HIRA/PCGF2/NOTCH4/RAE1…
BP	GO:0007127	meiosis I	0.442825	1.64723	0.0210938	CCNE1/MEIKIN/TOP2A/M1AP/DDX4/MAEL/TRIP13/TEX19/EME1/CDC25B/RAD54L/AURKA/PLK1/BRCA2/MSH5/RAD51/PRDM9/P3H4/SYCP2/MAJIN/FANCD2/MND1/RAD54B/SYCE3/RAD54B/BRIP1/HORMAD1/RAD21L1/CKS2/CCDC155/NDC1/REC8/MEIOB/PIWIL2/PTTG1/MCMDC2/FBXO5/DMRT1/DMRTC2/SYCP1/CCNE2/CENPS
BP	GO:0048285	organelle fission	0.442152	1.91439	0.00951053	CCNE1/MAPK15/LIF/MEIKIN/TOP2A/M1AP/DDX4/KIF14/UBE2C/MAEL/TPX2/TRIP13/MYBL2/KIF4A/KIF18B/PKMYT1/CDC6/TEX19/MKI67/NEK2/CENPF/KIF2C/KIF23/BUB1/EME1/CDCA5/NUF2/MTFR2/EGF/CDC25B/RAD54L/SPAG5/ANLN/BUB1B/FBXO43/FANCA/SGO1/AURKA/KIF18A/NCAPH/PLK1/CDCA8/ASPM/CDC25C/DSCC1/NDC80/CENPE/PRC1/BRCA2/CDC20/FGF8/AURKB/HASPIN/KIFC1/MSH5/TACC3/CDT1/DLGAP5/ZWINT/RAD51/MSX2/NCAPG/TTK/PRDM9/MTBP/P3H4/NUSAP1/BIRC5/RCC1…
BP	GO:0070613	regulation of protein processing	0.43975	1.63993	0.0193084	MAGEA3/CPN1/BIRC7/C4BPA/CFHR4/MELTF/NKD2/C8B/SERPINE1/ADAM8/CFHR2/CD5L/C2/C9/C8A/C4BPB/F2/ASTL/MMP14/CFB/NLRP7/SERPINF2/SRC/BCL2L12/C4A/C3/C4B/CD55/CR2/RFX4/CTSZ/F12/C1QB/MDM2/CFHR5/XIAP/CPB2
BP	GO:1902750	negative regulation of cell cycle G2/M phase transition	0.439338	1.60679	0.0369481	HMGA2/CDC6/CLSPN/CDK1/AURKA/PLK1/AURKB/DTL/BLM/ORC1/PSMD3/CHEK1/TICRR/BRCA1/MIIP/DONSON/PSMB9/PSMD11/PSMB8/PSMB2/PSMC4/TOPBP1/PSMD14/PSMD1/CDK5RAP3/PINX1/PSME3/PSMF1/GPR132/PSME4/PSMA7/PSMA4/RAD21/PSMB4/PSME2/CHMP4C/PSMB3/PSMD13/TAOK2/PSMB7/PSMA5/PSMD2/FZR1/PSMD12/PSMA1/NBN/PSMD5/PSMC2/PSMA3/MACROH2A1/BRCC3/PSMA2/HUS1B
BP	GO:0006302	double-strand break repair	0.439081	1.79664	0.00951053	HMGA2/TRIP13/RECQL4/FOXM1/EME1/CDCA5/RAD54L/AUNIP/TONSL/GINS4/BRCA2/RAD51AP1/XRCC2/DNA2/BLM/CDC45/RAD51/FANCB/MCM4/CGAS/MCM2/TIMELESS/POLQ/RAD54B/RAD54B/ESCO2/BRIP1/H4C12/H4C14/CHEK1/RAD21L1/CCDC155/MMS22L/DDX11/MCM8/MCM7/NSD2/RMI2/GINS2/CDC7/FEN1/CHEK2/H4C13/REC8/GEN1/SPIRE2/PRKDC/H2AX/BRCA1/MEIOB/SLX1A/H4C1/AP5Z1/H4C8/RFWD3/PARPBP/MCM3/H4C15/H4C4/MCMDC2/DTX3L/H3-4/MCM5/SLX1B/ACTR5/MCM6/HELB/H4C…
MF	GO:0004984	olfactory receptor activity	0.436991	1.86675	0.00951053	OR56A3/OR8A1/OR5M11/OR8K5/OR8B12/OR2A12/OR13H1/OR10G2/OR2B6/OR2G2/OR5P3/OR1Q1/OR6C70/OR11G2/OR2F2/OR8D1/OR9A4/OR5V1/OR6C2/OR10Q1/OR1G1/OR14I1/OR6A2/OR52E6/OR8G5/OR8K1/OR4F21/OR2A14/OR10K1/OR5AU1/OR1L1/OR4B1/OR9A2/OR4C12/OR4C5/OR5AN1/OR52K2/OR52W1/OR11H6/OR4F6/OR2T11/OR1J1/OR52N2/OR14A16/OR10D3/OR8G1/OR8D2/OR7A17/OR2A2/OR10H1/OR1J4/OR6V1/OR2T8/OR52E4/OR52N5/OR52M1/OR4K2/OR2M4/OR1N2/OR1A1/OR5T3/OR5…
BP	GO:0050911	detection of chemical stimulus involved in sensory perception of smell	0.436991	1.86675	0.00951053	OR56A3/OR8A1/OR5M11/OR8K5/OR8B12/OR2A12/OR13H1/OR10G2/OR2B6/OR2G2/OR5P3/OR1Q1/OR6C70/OR11G2/OR2F2/OR8D1/OR9A4/OR5V1/OR6C2/OR10Q1/OR1G1/OR14I1/OR6A2/OR52E6/OR8G5/OR8K1/OR4F21/OR2A14/OR10K1/OR5AU1/OR1L1/OR4B1/OR9A2/OR4C12/OR4C5/OR5AN1/OR52K2/OR52W1/OR11H6/OR4F6/OR2T11/OR1J1/OR52N2/OR14A16/OR10D3/OR8G1/OR8D2/OR7A17/OR2A2/OR10H1/OR1J4/OR6V1/OR2T8/OR52E4/OR52N5/OR52M1/OR4K2/OR2M4/OR1N2/OR1A1/OR5T3/OR5…
BP	GO:0048706	embryonic skeletal system development	0.436848	1.65043	0.017752	HOXC11/HOXA11/COL11A1/HOXC9/HOXA9/LHX1/RBP4/COL1A1/ALX1/WNT11/SHOX2/HOXB9/SIX1/HOXD10/MTHFD1L/MDFI/SIX4/HOXC6/SULF1/TBX15/MMP14/SATB2/IHH/HOXB7/PAX7/PAX5/SLC39A1/BMP4/HOXB6/SULF2/CHST11/TBX1
BP	GO:0072175	epithelial tube formation	0.434624	1.65154	0.015876	PAX2/SALL4/TRIM71/CTHRC1/ALX1/SIX1/STIL/LRP2/MTHFD1L/SOX4/PROX1/PAX8/LHX2/SOX9/HNF1B/FGF8/SIX4/PTK7/GATA3/TCAP/KIF20B/SOX8/ST14/SPINT2/FZD6/CELSR1/KAT2A/BMP4/PODXL/SDC4/IRX2/SCRIB/FZD2
BP	GO:0006405	RNA export from nucleus	0.434517	1.65555	0.0140738	NXF2/NXF3/NDC1/NUP210/NOL6/XPO5/DDX39A/RRS1/THOC2/NUP155/HHEX/SMG5/NUP62/NUP188/CPSF1/NUP107/UPF3B/ABCE1/NUP43/THOC6/XPOT/RAE1/ZNF593/NUP58/GLE1/EIF6/SMG7/U2AF2/NUP37/HNRNPA2B1/NUP85/SLBP/SEH1L/XPO1/SYMPK/NUP50/PABPN1/CPSF3/ALYREF/NUP205/NUP160/SSB/NXT1/IWS1/NUP93/EIF5A/POM121C/MAGOHB/SRSF1/POM121/POLR2D/CPSF6/CPSF4/LTV1/RNPS1/AGFG1/MAGOH/SRSF11/NCBP1/CHTOP/NUP98/UPF1/NCBP2/DHX9/DDX39B/NUP35/SRSF…
BP	GO:0071166	ribonucleoprotein complex localization	0.434174	1.64431	0.017752	NXF2/NXF3/NDC1/NUP210/NOL6/DDX39A/RRS1/THOC2/NUP155/HHEX/SMG5/NUP62/NUP188/CPSF1/NUP107/UPF3B/ABCE1/NUP43/THOC6/XPOT/RAE1/ZNF593/NUP58/GLE1/EIF6/SMG7/U2AF2/NUP37/HNRNPA2B1/NUP85/SLBP/SEH1L/XPO1/SYMPK/NUP50/PABPN1/CPSF3/ALYREF/NUP205/NUP160/SSB/NXT1/IWS1/NUP93/EIF5A/POM121C/MAGOHB/SRSF1/POM121/POLR2D/CPSF4/LTV1/RNPS1/AGFG1/MAGOH/SRSF11/NCBP1/CHTOP/NUP98/UPF1/NCBP2/DDX39B/NUP35/SRSF2/SRSF6/PRPF31/C…
BP	GO:0009593	detection of chemical stimulus	0.432865	1.87851	0.00951053	CST1/OR56A3/CST4/OR8A1/OR5M11/DRGX/OR8K5/OR8B12/OR2A12/OR13H1/CST2/OR10G2/UGT2A1/OR2B6/LBP/TAS2R38/PIP/OR2G2/OR5P3/OR1Q1/OR6C70/OR11G2/OR2F2/OR8D1/OR9A4/TREM2/OR5V1/OR6C2/OR10Q1/OR1G1/OR14I1/OR6A2/OR52E6/PKD2L1/CA6/OR8G5/TAS2R8/OR8K1/OR4F21/OR2A14/OR10K1/OR5AU1/OR1L1/OR4B1/OR9A2/OR4C12/OR4C5/TAS2R60/OR5AN1/OR52K2/OR52W1/OR11H6/OR4F6/OR2T11/OR1J1/LPO/OR52N2/TAS2R16/OR14A16/OR10D3/OR8G1/OR8D2/OR7A1…
BP	GO:0071426	ribonucleoprotein complex export from nucleus	0.432776	1.63638	0.017752	NXF2/NXF3/NDC1/NUP210/NOL6/DDX39A/RRS1/THOC2/NUP155/HHEX/SMG5/NUP62/NUP188/CPSF1/NUP107/UPF3B/ABCE1/NUP43/THOC6/XPOT/RAE1/ZNF593/NUP58/GLE1/EIF6/SMG7/U2AF2/NUP37/HNRNPA2B1/NUP85/SLBP/SEH1L/XPO1/SYMPK/NUP50/PABPN1/CPSF3/ALYREF/NUP205/NUP160/SSB/NXT1/IWS1/NUP93/EIF5A/POM121C/MAGOHB/SRSF1/POM121/POLR2D/CPSF4/LTV1/RNPS1/AGFG1/MAGOH/SRSF11/NCBP1/CHTOP/NUP98/UPF1/NCBP2/DDX39B/NUP35/SRSF2/SRSF6/C12orf50…
MF	GO:0004252	serine-type endopeptidase activity	0.431603	1.66551	0.0140738	PRSS41/PRSS58/MMP8/PRSS33/KLK6/PRSS21/HP/MMP3/MMP7/KLK5/PLAU/HTRA4/KLK4/PROC/TMPRSS5/FAP/ADAM8/CTRB2/PRSS56/MMP9/CTRB1/CORIN/C2/HABP2/GZMB/F2/PCSK9/PRSS55/TMPRSS4/HPR/F7/TMPRSS3/CFB/PRSS22/KLK15/PLG/PROZ
BP	GO:0006364	rRNA processing	0.430443	1.73004	0.00951053	RPP25/BOP1/NOP2/BYSL/DKC1/SUV39H1/DCAF13/CHD7/RRP9/GTPBP4/LYAR/NOL6/MRM1/DDX27/NPM3/DDX21/RRS1/NOP56/PDCD11/MRTO4/ESF1/DHX37/UTP14A/ERI1/EXOSC5/NOP58/EXOSC4/BUD23/HEATR1/NSUN5/DDX54/NOC4L/WDR12/DDX56/NOP14/WDR43/PES1/UTP25/NOLC1/RRP1/NAT10/POP4/FDXACB1/WDR75/NOL10/MRM2/REXO4/BMS1/GAR1/DDX10/UTP18/XRN2/RPL7L1/RPP38/LAS1L/WDR18/PWP2/ISG20L2/RPP40/WDR46/IMP4/RRP1B/DDX18/UTP6/RIOK1/UTP20/WDR74/WDR3/E…
BP	GO:0006310	DNA recombination	0.429055	1.78412	0.00951053	TOP2A/H1-6/TRIP13/RECQL4/TEX19/HMGB3/EME1/RAD54L/AUNIP/H1-8/TONSL/EXO1/GINS4/BRCA2/RAD51AP1/XRCC2/MSH5/BLM/CDC45/RAD51/FOXP3/FANCB/MCM4/PRDM9/CGAS/MCM2/TIMELESS/MND1/POLQ/KPNA2/RAD54B/SYCE3/RAD54B/PGBD5/BRIP1/CHEK1/RAD21L1/CCDC155/ATAD5/MMS22L/MCM8/MCM7/NSD2/PIF1/RMI2/GINS2/CDC7/FEN1/H1-5/REC8/BATF/GEN1/PRKDC/H2AX/BRCA1/MEIOB/TCF7/HSPD1/HDAC10/SLX1A/H1-3/AP5Z1/RFWD3/PARPBP/TCF3/MCM3/TNFSF4/MCMDC2…
BP	GO:0001838	embryonic epithelial tube formation	0.424945	1.60132	0.0242049	PAX2/SALL4/TRIM71/CTHRC1/ALX1/SIX1/STIL/LRP2/MTHFD1L/SOX4/PAX8/LHX2/SOX9/HNF1B/SIX4/PTK7/GATA3/KIF20B/SOX8/ST14/SPINT2/FZD6/CELSR1/KAT2A/BMP4/SDC4/IRX2/SCRIB/FZD2
BP	GO:0006338	chromatin remodeling	0.424576	1.67776	0.00951053	PIWIL1/HMGA2/CDKN2A/PABPC1L/HJURP/HMGB3/CENPI/KNL1/CENPA/MYB/SOX9/HELLS/FOXP3/CENPO/GATA3/OIP5/CENPW/CENPL/H4C12/H4C14/SATB2/CHEK1/NPM2/CENPN/CENPU/HMGA1/CHD7/CENPK/PAX7/H4C13/PADI2/ANP32E/CENPM/H4C1/NPM3/KAT2A/H4C8/H4C15/NUDT5/ZMIZ2/H4C4/CENPH/SUV39H2/ACTR5/H4C6/FOXA1/H4C9/CBX3/CENPS/HDAC1/TOP1/MIS18A/RUVBL1/MORC2/H4C2/BAZ1A/NASP/H4C5/CHD1L/CENPQ/ACTL6B/ACTL6A/HMGB2/RUVBL2/INO80B/SMARCA4/SMARCD1…
BP	GO:0031214	biomineral tissue development	0.422854	1.64929	0.012016	IBSP/MEPE/DSPP/WDR72/MMP13/HTN1/DMP1/SPP1/COL1A1/STATH/WNT11/COMP/KLK4/CYP27B1/ODAPH/SNX10/ADGRV1/SOX9/ALOX15/IFITM5/HTN3/MMP20/MSX2/AXIN2/AMELX/AMELY/COL1A2/CCL3/OTOL1/TSPEAR/FAM83H/SLC20A1/ISG15/SBNO2/CNNM4/AHSG/TCIRG1/PKDCC/TRPM4/BMP4/FBXO5/ASGR2/TBX1/LOX/ANKH
BP	GO:0002526	acute inflammatory response	0.422697	1.6394	0.0140738	CPN1/APOA2/C4BPA/SAA4/CRP/CFHR4/HP/LBP/ORM1/SAA2/C8B/SAA1/ADAM8/C2CD4A/TNFSF11/APCS/CFHR2/CD5L/C2/C9/C8A/C4BPB/F2/GATA3/HAMP/HPR/ZP3/ASS1/CFB/SERPINA1/ICAM1/VNN1/OSM/SERPINF2/AHSG/C4A/C3/TNFSF4/OSMR/TNFRSF11A/MBL2/C4B/PTGES/CD55/EPO/RHBDD3/CR2
BP	GO:0000077	DNA damage checkpoint	0.420607	1.61603	0.0209621	HMGA2/CLSPN/GTSE1/E2F1/EME1/E2F7/CDK1/SOX4/AURKA/PLK1/CDC25C/DTL/BLM/BRIP1/CHEK1/CCNB1/PCNA/CCND1/ARID3A/CHEK2/PRKDC/H2AX/BRCA1/RFWD3/DONSON/FBXO6/CASP2/RAD9A/MUC1/MSH2/CNOT11/TIPIN/MDM2/E2F8/BAX/RPA4/CDK5RAP3/TP53/CDK2/DOT1L/CNOT9/ATR/PML/WDR76/FBXO4/INTS7/CNOT3/PIDD1/TFDP1/RAD1/MDC1/CCAR2/TAOK2/PRPF19/PRMT1/GML/FZR1/NBN/RHNO1/CNOT2/BRCC3/HUS1B/E2F4/PCBP4/DDX39B/CUL4A/EME2/PPP1R10/MRE11
BP	GO:0007051	spindle organization	0.420529	1.64741	0.00951053	MAPK15/TPX2/MYBL2/KIF4A/STIL/NEK2/KIF23/WDR62/NUF2/SPAG5/AUNIP/AURKA/PLK1/ASPM/NDC80/CENPE/PRC1/CDC20/AURKB/KIFC1/TACC3/TTK/CEP72/SPC25/BIRC5/RCC1/KIF11/KIF4B/CENPW/BORA/POC1A/CCNB1/CCDC155/TUBB8/KNSTRN/PSRC1/CHEK2/SAC3D1/MZT1/MISP/STMN1/NEK6/FBXO5/HAUS7/KIF3B/MSTO1/NUP62/RACGAP1/CKAP5/EZR/TUBB/GOLGA6C/HAUS5/TUBG1/RAE1/TRIM36/HAUS6/SMC1A/TUBB1/HAUS2/HAUS8/EFHC1/FSD1/MYH9/WASHC5/SMC3/SPAST/WRAP73/…
BP	GO:0002223	stimulatory C-type lectin receptor signaling pathway	0.420494	1.56288	0.0467427	MUC16/MUCL1/MUC5B/MUC12/MUC4/PRKACG/MUC19/KRAS/CARD11/PSMD3/LYN/CLEC6A/SRC/CARD9/MUC13/MUC3A/MUC17/RELB/PSMB9/FCER1G/MUC20/MUC1/MUC2/PSMD11/PSMB8/PSMB2/PSMC4/PSMD14/PSMD1/KLRK1/KLRC4-KLRK1/PSME3/PSMF1/PSME4/PSMA7/NRAS/PSMA4/PSMB4/PSME2/PSMB3/PSMD13/PSMB7/PSMA5/SYK/PSMD2/PSMD12/PSMA1/PSMD5/PSMC2/PSMA3/PSMA2/CHUK/PAK2/PAK1/IKBKG/PSMB5/PSMB1/PSMD4/PSMD7/NFKB1/PRKCD/BCL10/IKBKB
BP	GO:0007098	centrosome cycle	0.420328	1.58392	0.0242049	STIL/NEK2/WDR62/CDK1/SGO1/AURKA/PLK1/BRCA2/XRCC2/PKHD1/CCNF/CEP72/KIF11/PCLAF/PLK4/POC1A/CHEK1/PARD6B/GEN1/BRCA1/SAC3D1/KAT2A/ODF2/CEP85/CEP131/SASS6/HAUS7/KIF25/KIF3B/NUP62/XRCC3/CKAP5/CEP250/CEP152/HAUS5/HAUS6/CDK2/CHORDC1/RANBP1/HAUS2/SSX2IP/HAUS8
BP	GO:0042254	ribosome biogenesis	0.419786	1.74727	0.00951053	VCX/RPP25/BOP1/NOP2/BYSL/DKC1/SUV39H1/DCAF13/CHD7/RRP9/GTPBP4/LYAR/NOL6/MRM1/DDX27/NPM3/DDX21/URB2/BRIX1/RRS1/NOP56/PDCD11/MTG2/MRTO4/ESF1/DDX31/DHX37/UTP14A/ERI1/NOC2L/EXOSC5/NOP58/EXOSC4/BUD23/HEATR1/NSUN5/MYBBP1A/PPAN/DDX54/GNL2/NOC4L/WDR12/DDX56/NOP14/ABCE1/WDR43/PES1/UTP25/AATF/NOLC1/RRP1/NLE1/NAT10/NIP7/POP4/FDXACB1/PAK1IP1/WDR75/NOL10/SURF6/MRM2/REXO4/BMS1/GAR1/DDX10/GTPBP10/UTP18/XRN2/ZNF…
BP	GO:0001704	formation of primary germ layer	0.41974	1.56801	0.0368518	PAX2/HOXA11/COL11A1/HMGA2/MMP8/ELF5/LHX1/WNT11/INHBA/MESP2/APELA/LAMA3/FOXC1/MMP9/LAMB3/HNF1B/ITGB4/POU5F1/MMP14/EOMES/COL5A2/TRIM15/ITGA2/DKK1/COL5A1/ITGB2/BMP4
BP	GO:0031023	microtubule organizing center organization	0.415269	1.57921	0.0275502	STIL/NEK2/WDR62/CDK1/SGO1/AURKA/PLK1/BRCA2/XRCC2/PKHD1/CCNF/CEP72/KIF11/PCLAF/PLK4/POC1A/MCIDAS/CHEK1/PARD6B/GEN1/BRCA1/SAC3D1/KAT2A/ODF2/CEP85/CEP131/CCDC78/SASS6/HAUS7/KIF25/KIF3B/NUP62/XRCC3/CKAP5/CEP250/CEP152/HAUS5/HAUS6/CDK2/CHORDC1/RANBP1/HAUS2/SSX2IP/HAUS8
BP	GO:0016072	rRNA metabolic process	0.413142	1.69166	0.00951053	RPP25/BOP1/CD3EAP/NOP2/BYSL/DKC1/DDX11/SUV39H1/DCAF13/CHD7/RRP9/GTPBP4/LYAR/NOL6/MRM1/DDX27/NPM3/DDX21/ERN2/RRS1/NOP56/POLR1B/SLFN13/PDCD11/MRTO4/ESF1/DHX37/UTP14A/ERI1/TCOF1/EXOSC5/NOP58/EXOSC4/BUD23/HEATR1/NSUN5/DDX54/NOC4L/WDR12/DDX56/NOP14/WDR43/PES1/UTP25/NOLC1/RRP1/NIFK/NAT10/NCL/POP4/FDXACB1/WDR75/NOL10/MRM2/REXO4/TP53/BMS1/GAR1/DDX10/UTP18/XRN2/GTF3C5/RPL7L1/RPP38/LAS1L/WDR18/PWP2/ISG20L2…
BP	GO:0035148	tube formation	0.41309	1.59059	0.0208692	PAX2/SALL4/TRIM71/CTHRC1/ALX1/SIX1/STIL/LRP2/MTHFD1L/SOX4/PROX1/PAX8/LHX2/SOX9/HNF1B/FGF8/SIX4/PTK7/GATA3/EDAR/TCAP/KIF20B/SOX8/ST14/SPINT2/FZD6/CELSR1/KAT2A/BMP4/PODXL/SDC4/IRX2/SCRIB/FZD2/TGM2/STK3
BP	GO:0042770	signal transduction in response to DNA damage	0.412102	1.56596	0.0319799	ANKRD1/FOXM1/GTSE1/E2F1/E2F7/CDK1/SOX4/AURKA/PLK1/CDC25C/BRCA2/DTL/CHEK1/CCNB1/ATAD5/PCNA/BID/ARID3A/CHEK2/BATF/PRKDC/BRCA1/TFAP4/SNAI1/CASP2/MUC1/MSX1/CNOT11/MAD2L2/CD74/MYO6/MDM2/E2F8/BAX/SPRED3/TP53/CDK2/CNOT9/ATR/PML/CNOT3/PIDD1/TFDP1/KDM1A/BCL3/PMAIP1/EEF1E1/PRPF19/PAXIP1/SPRED1/PRMT1/GML/FZR1/NBN/CNOT2/BRCC3/E2F4/SPRED2/PCBP4
BP	GO:0051607	defense response to virus	0.410471	1.67522	0.00951053	BPIFA1/IFNL3/IFNL2/IFNA8/IFNA1/CXCL9/CXCL10/IFNE/MMP12/IFNB1/RNASE2/AIM2/APOBEC3B/IFI6/IFNG/OAS3/NLRC5/IFNL1/CGAS/UNC93B1/IL27/IFNA5/STAT1/OAS2/MICB/IFNK/SPON2/IFITM1/ISG15/TRIM15/IL2RA/SKP2/CARD9/GBP1/DDX21/IFIH1/NT5C3A/FAM111A/DTX3L/SLFN13/DMBT1/IFIT3/UNC13D/AICDA/MX1/EXOSC5/IRF3/EXOSC4/PYCARD/SERINC5/PARP9/IFITM3/NLRP9/ADAR/IFI44L/ABCE1/IL12RB1/RSAD2/IRF7/IFIT2/TRIM11/IRF1/IFNA14/APOBEC3H/RTP4…
BP	GO:0009952	anterior/posterior pattern specification	0.409245	1.6537	0.00951053	FEZF1/HOXC10/HOXC11/HOXA11/HOXC13/GBX2/SIX3/HOXC9/HOXD13/HOXA10/HOXC8/WNT2/FOXH1/HOXA9/HES3/LHX1/TDRD5/ALX1/RIPPLY1/MESP2/OTX1/HOXB9/EN1/HOXD10/FOXC1/AURKA/MYF6/HNF1B/FGF8/XRCC2/MSX2/HOXC6/AXIN2/DLL3/HES6/TDGF1/CDX1/TCAP/NKX3-1/CDX2/HOXB7/LFNG/PRKDC/CELSR1/DKK1/KAT2A/BMP4/ALDH1A2/NKD1/HOXB6/LRP5/POFUT1
MF	GO:0004518	nuclease activity	0.408184	1.62879	0.00951053	PIWIL1/STK31/RNASE8/RNASE2/EME1/DNASE2B/RNASE9/PNLDC1/EXO1/HELZ2/DNA2/RPP25/DNASE1L2/PGBD5/POP1/POLD1/LACTB2/FEN1/RNASEH2A/GEN1/NME1/MEIOB/PIWIL2/SLX1A/MGME1/ERN2/AZGP1/SLFN13/RNASET2/PRORP/SLX1B/ERI1/PNPT1/EXOSC5/EXOSC4/RAG1/TSEN54/RAD9A/POLE/RNASE3/XRCC3/DCLRE1B/APEX2/RBBP8/AEN/DCLRE1A/DCLRE1C/DFFB/POP4/ZC3H12D/AGO2/REXO4/RIDA/SLX4/XRN2/REXO5/RPP38/LAS1L/ISG20L2/DCP2/RPP40/DNASE2/DROSHA/CPSF3/R…
CC	GO:0030176	integral component of endoplasmic reticulum membrane	0.405732	1.56226	0.0258053	DCSTAMP/ELOVL3/TAP1/RRBP1/TAP2/DHCR7/SLC27A2/ELOVL7/SCD/ARL6IP1/ALG3/PDIA3/PIGU/HLA-A/HLA-DQB1/DPM2/CLN3/HLA-DRB5/HLA-F/BCAP31/TAPBP/HLA-B/HLA-G/TRAM1/HLA-DQA1/HLA-DRB1/RCE1/PIGT/ZFYVE27/HLA-DQB2/HM13/CD74/RNF183/TMEM33/ERGIC3/SGPL1/SPPL2B/TBL2/ACER3/DGAT2/DPAGT1/HLA-DQA1/HLA-DQA2/SLC35B2/ANKLE2/EMC10/EXT1/HLA-C/HSPA5/HLA-DPB1/DOLK/GPAA1/RETREG1/EMC1/CLN3/SLC37A1/ABCB9/CALR/SLC37A3/EMC8/DERL1/SEC…
MF	GO:0005125	cytokine activity	0.402503	1.62645	0.00951053	IFNL3/IFNL2/LEFTY1/CSF2/CCL7/WNT2/IFNA8/BMP15/IL9/IFNA1/CXCL9/IL17C/SPP1/CXCL10/CXCL6/IFNE/LIF/CXCL11/CD70/INHBA/CXCL1/IL3/GDF15/IL37/IL11/IFNB1/CCL15/TNFRSF11B/CXCL5/TNFSF11/BMP8A/SCGB3A1/CCL18/TNFSF9/INHBB/TNFSF15/IFNG/CCL20/CXCL8/TIMP1/IFNL1/IL27/CXCL16/IFNA5/CCL3/TNFSF18/GDF2/IL32/IFNK/BMP1/CMTM1/OSM/CMTM7/TAFA5/BMP4/CKLF/PPBP/TNFSF4
BP	GO:0090501	RNA phosphodiester bond hydrolysis	0.401222	1.5457	0.028857	PIWIL1/RNASE8/RNASE2/RNASE9/PNLDC1/EXO1/HELZ2/RPP25/BOP1/POP1/LACTB2/FEN1/RNASEH2A/PIWIL2/ERN2/RRS1/AZGP1/SLFN13/RNASET2/PRORP/CPSF4L/ERI1/PNPT1/EXOSC5/EXOSC4/TSEN54/CPSF1/RNASE3/RNASE10/NOP14/MOV10/CSTF2/PIWIL4/POP4/AGO2/POLR3K/TUT1/RIDA/XRN2/RPP38/ISG20L2/DCP2/RPP40/ZNRD1/DROSHA/UTP20/CPSF3/USB1/ZC3H12A/NOB1/TSN/CSTF3/DCPS/EXOSC9/KRI1/EXOSC10/POP7/CPSF6/RRP36/CPSF4/EXOSC2/NCBP1/EXOSC8/CNOT2/DIS…
CC	GO:0000922	spindle pole	0.398769	1.55856	0.020676	TPX2/CDC6/NEK2/CENPF/WDR62/CDC25B/SPAG5/SGO1/AUNIP/AURKA/PLK1/CKAP2L/ASPM/PRC1/CDC20/AURKB/TACC3/DLGAP5/MAD2L1/KIF11/CKAP2/POC1A/CCNB1/CCDC155/KNTC1/DDX11/KNSTRN/KIF20B/PSRC1/DSN1/TMEM201/MISP/NEK6/ODF2/CEP85/FAM110A/SPDL1/CSPP1/MAD1L1/NUP62/CKAP5/PKP4/TOPBP1/LRMP/PLEKHG6/TUBG1/RAE1/RASSF10/SPOUT1
BP	GO:0016331	morphogenesis of embryonic epithelium	0.397097	1.53235	0.0331157	PAX2/SALL4/TRIM71/WNT2/CTHRC1/ALX1/SIX1/STIL/LRP2/MTHFD1L/SOX4/PAX8/LHX2/SOX9/HNF1B/FGF8/SIX4/PTK7/SULF1/GATA3/KIF20B/SOX8/ST14/SPINT2/FZD6/CELSR1/KAT2A/BMP4/ALDH1A2/SDC4/PDX1/IRX2/WNT7B/SCRIB/FZD2/JAG2
BP	GO:0051054	positive regulation of DNA metabolic process	0.396431	1.61109	0.00951053	STPG4/MAPK15/FGFR4/FOXM1/NEK2/E2F7/CDK1/PRKCG/DSCC1/AURKB/DNA2/CDT1/RAD51/FANCB/CHTF18/UCN/PRDM9/TIMELESS/NPM2/RFC3/DBF4/DKC1/ATAD5/DDX11/PCNA/NSD2/CDC7/SRC/SPIRE2/PRKDC/DNMT1/H2AX/BRCA1/CBX8/PDGFB/HDAC10/SLX1A/PDGFRB/CCT5/TNFSF4/DTX3L/SLX1B/CCT6A/EREG/RFC4/PARP9/GLI1/KCTD13/DBF4B/MSH2/CLCF1/TBX21/MORC2/TFRC/NOX4/MAD2L2/TRIM28/E2F8/TMEM161A/ST20/PRKD2/WRAP53/BAX/HSP90AB1/HSP90AA1/TIGAR/GRHL2/CCT2…
BP	GO:0140053	mitochondrial gene expression	0.393515	1.53644	0.0255654	TWNK/DARS2/PUS1/MTG2/PRORP/PNPT1/TBRG4/SHMT2/FASTKD3/GARS1/CDK5RAP1/MRPS5/MRPL12/POLRMT/MTG1/PRKAA1/MRPL15/TRUB2/ERAL1/MTIF2/MTERF3/MRPS26/MRPS35/TFAM/MRPL17/MRPS12/TARS2/EARS2/MRPL36/MRPL13/RMND1/MRPS17/LRPPRC/MRRF/MTRF1/MRPS30/TFB2M/PTCD3/FASTKD5/YARS2/MRPL21/MRPS2/DAP3/RCC1L/TUFM/TSFM/GATC/MRPL50/MRPL2/QRSL1/MRPL3/LARS2/MRPL48/MRPL4/SUPV3L1/MRPL37/MRPL47/MRPL19/MRPS34/MRPS18B/UQCC1/SLC25A33/IA…
BP	GO:0000910	cytokinesis	0.392004	1.53764	0.0238712	DRD2/KIF14/KIF4A/CDC6/CEP55/KIF23/E2F7/SSTR5/CDC25B/ECT2/ANLN/AURKA/PLK1/CENPA/PRC1/BRCA2/KIF20A/AURKB/CDT1/CIT/RTKN/RXFP3/NUSAP1/KIF4B/SEPTIN3/CKAP2/KIF20B/TAS1R2/SPIRE2/BCL2L1/STMN1/ROPN1B/RAB11FIP4/KIF3B/CSPP1/NUP62/INCENP/GIT1/RACGAP1/ENTR1/SEPTIN11/MYO19/PKP4
BP	GO:0002819	regulation of adaptive immune response	0.390806	1.52102	0.0387865	C4BPA/FOXJ1/IFNB1/ALOX15/FOXP3/C4BPB/GATA3/CD274/IL27/ZP3/HAVCR2/RIPK2/NECTIN2/ATAD5/NSD2/CEACAM1/TRAF2/PVR/JAK3/CD80/HSPD1/C3/TRPM4/CD1B/HLA-A/TNFSF4/SLC11A1/FAM49B/IL27RA/HLA-F/FCER1G/PYCARD/HLA-B/FCER2/HLA-G/HPX/MSH2/CLCF1/TBX21/IL12RB1/TNFRSF1B/TFRC/RSAD2/MAD2L2/IRF7/IRF1/IL18R1/TNFRSF14/PTPN6/HLA-C/LTA/FADD/SKAP1/TRIM27/SHLD1/CD4/IL12B/PRKCZ
BP	GO:0048736	appendage development	0.389944	1.53928	0.0189672	HOXC10/HOXC11/HOXA11/SP8/HOXC13/SALL4/HOXD13/TBX4/HOXA10/HOXA9/ALX1/HOXD12/COMP/SHOX2/EN1/HOXD10/RSPO4/KREMEN2/SP9/SOX4/DLX6/SOX9/FGF8/MSX2/ITGB4/ITGA6/SLC7A11/FGF4/EVX2/IHH/CHD7/IQCE/FZD6/DKK1/PKDCC/KAT2A/SLC39A1/BMP4/ALDH1A2/CHST11/FMN1/WNT7A
BP	GO:0060173	limb development	0.389944	1.53928	0.0189672	HOXC10/HOXC11/HOXA11/SP8/HOXC13/SALL4/HOXD13/TBX4/HOXA10/HOXA9/ALX1/HOXD12/COMP/SHOX2/EN1/HOXD10/RSPO4/KREMEN2/SP9/SOX4/DLX6/SOX9/FGF8/MSX2/ITGB4/ITGA6/SLC7A11/FGF4/EVX2/IHH/CHD7/IQCE/FZD6/DKK1/PKDCC/KAT2A/SLC39A1/BMP4/ALDH1A2/CHST11/FMN1/WNT7A
BP	GO:0006403	RNA localization	0.389692	1.5837	0.00951053	LUZP4/IGF2BP1/IGF2BP3/IGF2BP2/NXF2/NXF3/DKC1/NDC1/NUP210/EIF5AL1/RANBP17/NOL6/XPO5/DDX39A/CCT5/ZC3H3/RRS1/THOC2/NUP155/MEX3D/PNPT1/NOP58/CCT6A/HHEX/SMG5/NUP62/NUP188/CPSF1/NUP107/NXT2/RUVBL1/CKAP5/UPF3B/ABCE1/RBFOX1/BICD1/WRAP53/NUP43/THOC6/XPOT/RAE1/MVP/CCT2/MX2/CCT3/ATR/ZNF593/NUP58/GLE1/EIF6/SMG7/U2AF2/NUP37/RUVBL2/DCP2/HNRNPA2B1/NUP85/SLBP/SEH1L/XPO1/SYMPK/NUP50/HSF1/PABPN1/CPSF3/ALYREF/NUP20…
CC	GO:0031227	intrinsic component of endoplasmic reticulum membrane	0.389331	1.50799	0.047464	DCSTAMP/ELOVL3/TAP1/GRAMD2A/RRBP1/TAP2/DHCR7/SLC27A2/ELOVL7/SCD/ARL6IP1/ALG3/PDIA3/PIGU/HLA-A/HLA-DQB1/PGAP3/DPM2/CLN3/HLA-DRB5/HLA-F/BCAP31/TAPBP/HLA-B/HLA-G/TRAM1/HLA-DQA1/HLA-DRB1/RCE1/PIGT/ZFYVE27/HLA-DQB2/HM13/CD74/RNF183/GRAMD1A/TMEM33/ERGIC3/SGPL1/SPPL2B/TBL2/ACER3/DGAT2/DPAGT1/HLA-DQA1/HLA-DQA2/SLC35B2/ANKLE2/EMC10/EXT1/HLA-C/HSPA5/HLA-DPB1/DOLK/GPAA1/RETREG1/EMC1/CLN3/SLC37A1/ABCB9/CALR/…
BP	GO:0071897	DNA biosynthetic process	0.388545	1.54639	0.0156092	ANKRD1/MAPK15/TERT/FGFR4/NEK2/CENPF/DSCC1/AURKB/DTL/CHTF18/POLQ/PCLAF/USP43/GDF2/POLD1/POLD3/RFC3/DKC1/TYMS/LIG1/PCNA/PIF1/ISG15/POLE2/SRC/PDGFB/TK1/PDGFRB/CCT5/DNAJC2/SPHK1/SYCP1/LOX/CCT6A/SMG5/RFC4/POLE/POLN/DACH1/PARP10/MEN1/NOX4/MAD2L2/NAT10/PRKD2/WRAP53/HSP90AB1/HSP90AA1/GRHL2/UBE2L6/TP53/POLG2/GAR1/CCT2/CCT3/LIN9/ATR/GNL3L/TELO2/FBXO4/WRNIP1/PINX1/SMG7/POLA2/DCP2/HNRNPA2B1/TFDP1/POLA1/RFC2/…
BP	GO:0002250	adaptive immune response	0.386968	1.66603	0.00951053	C4BPA/FGB/CRP/FOXJ1/IFNA8/ULBP1/IFNA1/IFNE/C8B/FGL1/CD70/ULBP2/IFNB1/APCS/IL18BP/EXO1/ALOX15/CD8B2/IFNG/C2/PRR7/C9/LILRB4/FOXP3/TAP1/C8A/C4BPB/UNC93B1/GATA3/CD274/IL27/IL13RA2/IFNA5/LAMP3/TNFSF18/EOMES/ZP3/HAVCR2/RIPK2/MICB/NECTIN2/FCGR1B/TAP2/IFNK/TNFRSF21/LYN/ATAD5/NSD2/CLEC6A/CEACAM1/TRAF2/ICAM1/PVR/LAG3/BATF/CTSH/ZNF683/JAK3/SH2D1B/GCNT3/CD80/HSPD1/C4A/C3/TCIRG1/TRPM4/CD1B/ULBP3/INPP5D/HLA-A/…
CC	GO:0005819	spindle	0.386705	1.63836	0.00951053	KIF2B/MAPK15/DCDC2/KIF14/TPX2/KIF4A/KIF18B/CDC6/NEK2/CENPF/KIF23/WDR62/CDK1/CDC25B/SKA3/SPAG5/ECT2/BUB1B/SGO1/AUNIP/AURKA/KIF18A/PLK1/SKA1/CDCA8/CKAP2L/ASPM/CENPE/PRC1/CDC20/KIF20A/AURKB/PKHD1/KIF15/HASPIN/KIFC1/TACC3/DLGAP5/TTK/NUSAP1/BIRC5/MAD2L1/KIF11/SHCBP1/CKAP2/BORA/POC1A/RCC2/CCNB1/CCDC155/TUBB8/KNTC1/DDX11/KNSTRN/KIF20B/CDC7/PSRC1/DSN1/KIF22/NSUN2/TMEM201/SAC3D1/MZT1/MISP/NEIL2/KAT2A/EML4…
BP	GO:0043062	extracellular structure organization	0.386573	1.66522	0.00951053	IBSP/COL10A1/APOA2/COL11A1/DSPP/MMP8/ALB/FGB/MMP13/MMP11/NOX1/MMP3/ADAMTS14/ADAMTS20/MMP7/ACAN/LAMC2/MELTF/COL9A3/DMP1/SPP1/KLK5/FGG/COL1A1/ADAM12/PLA2G2E/COMP/MMP12/APOC1/MMP10/KLK4/FERMT1/BGN/FGFR4/NR2E1/FAP/MATN3/SERPINE1/ADAMTS2/ADAM8/APOE/AGRN/LAMA3/TNFRSF11B/CTRB2/AGT/PLA2G7/MFAP2/PRKACG/FOXC1/LIPG/LIPC/MMP9/LAMB3/FSCN1/SOX9/CTRB1/PLOD3/COL22A1/TIMP1/ICAM5/COL3A1/APOC4/MMP20/PLA2G2A/COL9A1/…
BP	GO:0009615	response to virus	0.385484	1.62173	0.00951053	BPIFA1/IFNL3/IFNL2/HMGA2/IFNA8/IFNA1/CXCL9/CXCL10/IFNE/MMP12/IFNB1/RNASE2/AIM2/APOBEC3B/IFI6/IFNG/URI1/OAS3/FOXP3/NLRC5/IFNL1/CGAS/UNC93B1/GATA3/IL27/IFNA5/LCN2/CDK6/STAT1/OAS2/MICB/IFNK/FOSL1/HMGA1/MST1R/SPON2/IFITM1/ISG15/TRIM15/IL2RA/SKP2/SRC/BCL2L1/CARD9/GBP1/STMN1/DDX21/IFIH1/CCT5/TNFSF4/IVNS1ABP/NT5C3A/FAM111A/IFI44/DTX3L/SLFN13/DMBT1/IFIT3/DUOX2/UNC13D/AICDA/MX1/EXOSC5/IRF3/EXOSC4/PYCARD/S…
BP	GO:1901991	negative regulation of mitotic cell cycle phase transition	0.385473	1.56198	0.0117113	HMGA2/CDKN2A/TRIP13/CDC6/CLSPN/CENPF/GTSE1/E2F1/BUB1/E2F7/CDK1/SOX4/BUB1B/AURKA/PLK1/CDC25C/NDC80/CDC20/AURKB/BLM/CDT1/TTK/ORC1/MAD2L1/PSMD3/CDK6/CCNB1/PCNA/CCND1/ARID3A/EZH2/CHEK2/TICRR/GEN1/PRKDC/BRCA1/RBL1/RFWD3/FBXO5/SPDL1/MIIP/DONSON/PSMB9/CASP2/MAD1L1/MUC1/XRCC3/BUB3/CNOT11/PSMD11/PSMB8/MAD2L2/PSMB2/PSMC4/TOPBP1/PSMD14/MDM2/E2F8/PSMD1/BAX/DACT1/CDK2AP2/CDK5RAP3/TP53/CDK2/CNOT9/PML/PINX1/CNO…
BP	GO:0002449	lymphocyte mediated immunity	0.385466	1.57833	0.00951053	C4BPA/CRP/FOXJ1/ULBP1/C8B/CD70/ULBP2/IFNB1/APCS/EXO1/C2/GZMB/C9/FOXP3/C8A/C4BPB/GATA3/IL13RA2/ZP3/HAVCR2/MICB/NECTIN2/ATAD5/NSD2/CEACAM1/TRAF2/ICAM1/PVR/LAG3/BATF/CTSH/SERPINB9/SH2D1B/GCNT3/HSPD1/C4A/C3/TCIRG1/TRPM4/CD1B/ULBP3/INPP5D/HLA-A/TNFSF4/HLA-DQB1/MBL2/C4B/CTSC/SLC11A1/UNC13D/AICDA/FAM49B/IL27RA/CD55/HLA-F/CR2/FCER1G/HLA-B/FCER2/HLA-G/HPX/LGALS9/MSH2/CLCF1/TBX21/IL12RB1/TNFRSF1B/KIR2DL4/T…
BP	GO:0030198	extracellular matrix organization	0.383941	1.6332	0.00951053	IBSP/COL10A1/COL11A1/DSPP/MMP8/FGB/MMP13/MMP11/NOX1/MMP3/ADAMTS14/ADAMTS20/MMP7/ACAN/LAMC2/MELTF/COL9A3/DMP1/SPP1/KLK5/FGG/COL1A1/ADAM12/COMP/MMP12/MMP10/KLK4/FERMT1/BGN/FGFR4/NR2E1/FAP/MATN3/SERPINE1/ADAMTS2/ADAM8/AGRN/LAMA3/TNFRSF11B/CTRB2/AGT/MFAP2/FOXC1/MMP9/LAMB3/FSCN1/SOX9/CTRB1/PLOD3/COL22A1/TIMP1/ICAM5/COL3A1/MMP20/COL9A1/ITGAX/P3H4/SULF1/ITGB4/ITGA6/COL1A2/OTOL1/MMP14/ADAMTSL2/SERPINH1/C…
BP	GO:0034341	response to interferon-gamma	0.38124	1.51935	0.0173467	CCL7/UBD/ACOD1/GBP5/CLDN1/FCGR1A/CCL15/CYP27B1/CCL18/TRIM31/IFNG/CCL20/OAS3/NLRC5/GBP4/GBP7/CXCL16/PARP14/CCL3/KYNU/TDGF1/NOS2/STAT1/OAS2/ASS1/FCGR1B/SLC26A6/IFITM1/ICAM1/IFI30/TLR2/GBP1/FLNB/HLA-A/HLA-DQB1/SLC11A1/HLA-DRB5/HLA-F/IRF3/CIITA/PARP9/HLA-B/HLA-G/IFITM3/PTAFR/NMI/HLA-DQA1/HPX/LGALS9/HLA-DRB1/EDN1/IL12RB1/HLA-DQB2/SOCS1/IRF7/IRF1/SIRPA/IFNGR1/HSP90AB1/MED1/RAB20/IRF5/HLA-DQA1/HLA-DQA2/…
BP	GO:0090068	positive regulation of cell cycle process	0.380805	1.58085	0.00951053	HMGA2/CCNE1/POU4F1/MAPK15/TERT/DRD2/KIF14/UBE2C/CDC6/FAP/GTSE1/KIF23/E2F1/CDCA5/E2F7/CDK1/SSTR5/EGF/CDC25B/SOX4/SPAG5/ECT2/AURKA/CDC25C/NDC80/FGF8/AURKB/CDC25A/DTL/CDT1/DLGAP5/CDC45/MSX2/CIT/PRDM9/MTBP/RXFP3/NUSAP1/MAD2L1/INSM1/PLK4/POC1A/RCC2/NPM2/CCNB1/IGF2/DBF4/ATAD5/DDX11/PCNA/KIF20B/CCND1/ARID3A/CDC7/FEN1/EZH2/TAS1R2/CHEK2/GEN1/BRCA1/PDGFB/PIWIL2/PDGFRB/FBXO5/DMRT1/LRP5/SPHK1/RAB11FIP4/KIF3B…
BP	GO:0050852	T cell receptor signaling pathway	0.379897	1.51295	0.0267853	CARD11/LILRB4/FOXP3/GATA3/THY1/PSMD3/RIPK2/NECTIN2/TNFRSF21/KCNN4/CEACAM1/CD276/CACNA1F/GBP1/FYB1/INPP5D/HLA-DQB1/LCK/CTLA4/HLA-DRB5/BTN1A1/PRAM1/PSMB9/BTN3A1/HLA-DQA1/PTPRJ/HLA-DRB1/PSMD11/LIME1/EZR/HLA-DQB2/PSMB8/PSMB2/PSMC4/BTN3A2/PSMD14/PSMD1/PRKD2/RBCK1/HLA-DQA1/HLA-DQA2/PTPN6/HLA-DPB1/PAWR/SKAP1/UBASH3A/PAG1/CD4/PIK3CB/CD300A/PSME3/PSMF1/PVRIG/PSME4/CSK/LCP2/PSMA7/PSMA4/PSMB4/ZC3H12A/BCAR1/…
BP	GO:0003002	regionalization	0.378911	1.60697	0.00951053	FEZF1/HOXC10/PAX2/HOXC11/HOXA11/EVX1/SP8/HOXC13/GBX2/SIX3/HOXC9/FOXJ1/HOXD13/HOXD11/HOXA10/HOXC8/WNT2/FOXH1/HOXA9/HES3/LHX1/TDRD5/ALX1/RIPPLY1/MESP2/OTX1/HOXB9/SIX1/EN1/WNT8B/LMX1B/HOXD10/EMX1/LRP2/FOXC1/MDFI/AURKA/PAX8/LHX2/MYF6/HNF1B/FGF8/XRCC2/ADGRG1/MSX2/HOXC6/AXIN2/DLL3/HES6/TDGF1/EOMES/FOXD1/CDX1/TCAP/NKX3-1/CDX2/HOXB7/PAX7/LFNG/PRKDC/DLL4/CELSR1/DKK1/C3/KAT2A/BMP4/SMAD6/LHX3/DMRTA2/ALDH1A2…
BP	GO:0006959	humoral immune response	0.37764	1.54775	0.00951053	BPIFA1/CPN1/BPIFA2/C4BPA/FGB/CRP/FOXJ1/DEFB126/CFHR4/HTN1/IFNA8/BPIFB2/IFNA1/CXCL9/KLK5/CXCL10/CXCL6/ACOD1/TREM2/S100A7/IFNE/C8B/CXCL11/CXCL1/IFNB1/CXCL5/APCS/SEMG1/CFHR2/EXO1/CD5L/IFNG/C2/MNX1/CXCL8/C9/HTN3/C8A/C4BPB/SEMG2/F2/PLA2G2A/GATA3/IFNA5/LCN2/ZP3/CFB/IFNK/TNFRSF21/H2BC11/SPON2/COLEC10/GNLY/C4A/C3/PAX5/PPBP/HLA-DQB1/MBL2/C4B/DMBT1/H2BC8/DEFB127/SLC11A1/DEFB1/CD55/PRSS3/CR2
CC	GO:0005788	endoplasmic reticulum lumen	0.375565	1.57486	0.00951053	COL10A1/APOA2/MEPE/COL11A1/CYP2W1/NOTUM/ALB/IGFBP1/MSLN/ITIH2/CP/KNG1/BMP15/BPIFB2/SERPINA10/EVA1A/MELTF/COL9A3/DMP1/SPP1/FGG/COL1A1/F5/COL26A1/AFP/PROC/MATN3/APOE/ARSL/P4HA3/SPP2/LIPC/PLOD3/COL22A1/TMEM132A/TIMP1/COL3A1/F2/FKBP10/PCSK9/COL9A1/AMELX/IL27/COL1A2/SERPINH1/COL5A2/F7/STC2/CLN6/COL27A1/IGFBP3/APOA5/PROZ/TOR4A/ADAMTS7/SERPINA1/SLC27A2/RCN3/VCAN/VGF/APOL1/PLAUR/HYOU1/AHSG/PDGFB/RCN1/COL…
BP	GO:0002460	adaptive immune response based on somatic recombination of immune receptors built from immunoglobulin superfamily domains	0.373841	1.53557	0.015196	C4BPA/CRP/FOXJ1/ULBP1/C8B/CD70/ULBP2/IFNB1/APCS/IL18BP/EXO1/C2/C9/FOXP3/C8A/C4BPB/GATA3/CD274/IL27/IL13RA2/ZP3/HAVCR2/RIPK2/MICB/NECTIN2/ATAD5/NSD2/CEACAM1/TRAF2/ICAM1/PVR/BATF/CTSH/JAK3/GCNT3/CD80/HSPD1/C4A/C3/TCIRG1/TRPM4/CD1B/ULBP3/INPP5D/HLA-A/TNFSF4/HLA-DQB1/MBL2/C4B/CTSC/SLC11A1/UNC13D/AICDA/FAM49B/IL27RA/CD55/RELB/HLA-F/CR2/NFKB2/FCER1G/HLA-B/FCER2/HLA-G/HPX/MSH2/CLCF1/TBX21/IL12RB1/TNFRSF…
BP	GO:0050657	nucleic acid transport	0.373448	1.48727	0.0397742	LUZP4/IGF2BP1/IGF2BP3/IGF2BP2/NXF2/NXF3/NDC1/NUP210/EIF5AL1/RANBP17/NOL6/XPO5/DDX39A/ZC3H3/RRS1/THOC2/NUP155/PNPT1/HHEX/SMG5/NUP62/NUP188/CPSF1/NUP107/NXT2/CKAP5/UPF3B/ABCE1/RBFOX1/NUP43/THOC6/XPOT/RAE1/MVP/MX2/ZNF593/NUP58/GLE1/EIF6/SMG7/U2AF2/NUP37/HNRNPA2B1/NUP85/SLBP/SEH1L/XPO1/SYMPK/NUP50/HSF1/PABPN1/CPSF3/ALYREF/NUP205/NUP160/SSB/NXT1/IWS1/NUP93/KHSRP/EIF5A/NUTF2/POM121C/LRPPRC/MAGOHB/FMR1/…
BP	GO:0050658	RNA transport	0.373448	1.48727	0.0397742	LUZP4/IGF2BP1/IGF2BP3/IGF2BP2/NXF2/NXF3/NDC1/NUP210/EIF5AL1/RANBP17/NOL6/XPO5/DDX39A/ZC3H3/RRS1/THOC2/NUP155/PNPT1/HHEX/SMG5/NUP62/NUP188/CPSF1/NUP107/NXT2/CKAP5/UPF3B/ABCE1/RBFOX1/NUP43/THOC6/XPOT/RAE1/MVP/MX2/ZNF593/NUP58/GLE1/EIF6/SMG7/U2AF2/NUP37/HNRNPA2B1/NUP85/SLBP/SEH1L/XPO1/SYMPK/NUP50/HSF1/PABPN1/CPSF3/ALYREF/NUP205/NUP160/SSB/NXT1/IWS1/NUP93/KHSRP/EIF5A/NUTF2/POM121C/LRPPRC/MAGOHB/FMR1/…
BP	GO:0051236	establishment of RNA localization	0.37291	1.48577	0.0357722	LUZP4/IGF2BP1/IGF2BP3/IGF2BP2/NXF2/NXF3/NDC1/NUP210/EIF5AL1/RANBP17/NOL6/XPO5/DDX39A/ZC3H3/RRS1/THOC2/NUP155/PNPT1/HHEX/SMG5/NUP62/NUP188/CPSF1/NUP107/NXT2/CKAP5/UPF3B/ABCE1/RBFOX1/NUP43/THOC6/XPOT/RAE1/MVP/MX2/ATR/ZNF593/NUP58/GLE1/EIF6/SMG7/U2AF2/NUP37/HNRNPA2B1/NUP85/SLBP/SEH1L/XPO1/SYMPK/NUP50/HSF1/PABPN1/CPSF3/ALYREF/NUP205/NUP160/SSB/NXT1/IWS1/NUP93/KHSRP/EIF5A/NUTF2/POM121C/LRPPRC/MAGOHB/F…
BP	GO:0022613	ribonucleoprotein complex biogenesis	0.372812	1.61662	0.00951053	VCX/GRB7/RPP25/BOP1/NOP2/BYSL/DKC1/SUV39H1/DCAF13/CHD7/RRP9/TICRR/GTPBP4/LYAR/NOL6/MRM1/DDX27/PATL2/NPM3/DDX21/URB2/BRIX1/RRS1/NOP56/SNRPD1/PDCD11/MTG2/MRTO4/SNRPB/ESF1/DDX31/DHX37/UTP14A/ERI1/ATXN2L/NOC2L/TGS1/EXOSC5/NOP58/EXOSC4/EIF3B/BUD23/HEATR1/NSUN5/MYBBP1A/PPAN/DDX54/GNL2/NOC4L/PATL1/WDR12/RUVBL1/DDX56/ADAR/NOP14/ABCE1/WDR43/PES1/UTP25/BICD1/AATF/NOLC1/RRP1/NLE1/NAT10/NIP7/POP4/FDXACB1/HSP…
BP	GO:0016485	protein processing	0.370597	1.52585	0.015196	CGB3/MAGEA3/CPN1/BIRC7/C4BPA/FGB/KLK6/CFHR4/MELTF/FGG/NKD2/PLAU/C8B/APOH/COMP/CPXM1/SERPINE1/ADAMTS2/ADAM8/CFHR2/CD5L/CORIN/C2/C9/C8A/C4BPB/F2/PCSK9/CPZ/ASTL/MMP14/RIPK2/F7/CFB/IHH/ASPRV1/NLRP7/FSHB/SERPINF2/CTSH/SRC/BCL2L12/C4A/C3/ECE2/C4B/ADAM10/CLN3/CD55/PRSS3/CR2/MYRF/CASP2/HJV/CPD/LHB/PYCARD/CASP8/GGT1/RFX4/CUZD1/CPM/RCE1/FURIN/CTSZ/HM13/CTSS/PRSS12/F12/C1QB/MDM2/CFHR5/XIAP/CPB2
BP	GO:1901988	negative regulation of cell cycle phase transition	0.369748	1.50917	0.0216792	HMGA2/CDKN2A/TRIP13/CDC6/CLSPN/CENPF/GTSE1/E2F1/BUB1/E2F7/CDK1/SOX4/BUB1B/AURKA/PLK1/CDC25C/NDC80/CDC20/AURKB/DTL/BLM/CDT1/TTK/ORC1/MAD2L1/PSMD3/CDK6/CHEK1/CCNB1/PCNA/CCND1/ARID3A/EZH2/CHEK2/TICRR/GEN1/PRKDC/BRCA1/RBL1/RFWD3/FBXO5/SPDL1/MIIP/DONSON/PSMB9/CASP2/MAD1L1/MUC1/XRCC3/BUB3/MEN1/CNOT11/PSMD11/PSMB8/MAD2L2/PSMB2/PSMC4/TOPBP1/PSMD14/MDM2/E2F8/PSMD1/BAX/DACT1/CDK2AP2/CDK5RAP3/TP53/CDK2/CNOT…
BP	GO:0050792	regulation of viral process	0.36637	1.4663	0.0397742	IFNL3/HMGA2/TOP2A/IFNB1/APOE/APCS/PROX1/TRIM31/TRIM10/CXCL8/OAS3/LAMP3/CCL3/KPNA2/STAT1/NECTIN2/IFITM1/ISG15/TRIM15/NELFCD/TFAP4/MBL2/FAM111A/AICDA/MX1/TRIM59/HDAC1/IFITM3/PARP10/LGALS9/ADAR/MORC2/RSAD2/CD74/TRIM11/TRIM28/APOBEC3H/SRPK1/BST2/STAU1/OAS1/PML/TRIM27/CD4/IGF2R/PPIH/SMARCA4/RRP1B/ILF3/APOBEC3G/ANXA2/NELFB/NELFA/PLSCR1/LEF1/NR5A2/SMC3/ZC3H12A/FCN3/APOBEC3F/RESF1/CHMP4C/TNF/TRIM14/POLR2…
BP	GO:0051168	nuclear export	0.366176	1.45894	0.045696	GTSE1/NXF2/NXF3/NDC1/NUP210/RANBP17/NOL6/XPO5/DDX39A/RRS1/THOC2/NUP155/RANGAP1/CSE1L/UHMK1/HHEX/SMG5/NUP62/NUP188/CPSF1/NUP107/UPF3B/ABCE1/CCHCR1/MDM2/NUP43/THOC6/XPOT/RAE1/TP53/XPO6/ZNF593/CDK5/NUP58/GLE1/EIF6/SMG7/U2AF2/NUP37/CALR/HNRNPA2B1/NUP85/LSG1/SLBP/SEH1L/XPO1/SYMPK/NUP50/PABPN1/SMURF1/CPSF3/ALYREF/NUP205/NUP160/SSB/NXT1/IWS1/NUP93/EIF5A/NUTF2/POM121C/MAGOHB/SRSF1/POM121/POLR2D/RITA1/BAR…
BP	GO:0033044	regulation of chromosome organization	0.365829	1.54692	0.00951053	EZHIP/MAPK15/LIF/TOP2A/H1-6/TRIP13/CDC6/DNMT3B/MKI67/NEK2/CENPF/BUB1/CDCA5/BUB1B/H1-8/PLK1/MYB/NDC80/CENPE/CDC20/AURKB/ATAD2/TACC3/CDT1/DLGAP5/CDC45/FOXP3/TTK/UCN/AXIN2/MAD2L1/GATA3/MCM2/CHEK1/CCNB1/IGF2/DKC1/PRDM12/HMGA1/DDX11/PIF1/RMI2/FEN1/PAX7/H1-5/PADI2/SRC/GEN1/DNMT1/BRCA1/PIWIL2/SLX1A/PTTG1/H1-3/PAX5/KAT2A/CCT5/NEK6/FBXO5/AICDA/SPDL1/DMRTC2/SLX1B/NOC2L/CCT6A/MAD1L1/SREBF1/SMG5/NAA40/MUC1/X…
BP	GO:0045930	negative regulation of mitotic cell cycle	0.364192	1.52786	0.0129967	HMGA2/CDKN2A/TOP2A/TRIP13/CDC6/CLSPN/FAP/CENPF/GTSE1/E2F1/BUB1/EME1/E2F7/CDK1/SOX4/BUB1B/FOXC1/AURKA/PLK1/CDC25C/NDC80/BTG4/CDC20/AURKB/BLM/CDT1/ZWINT/TTK/ORC1/MTBP/MAD2L1/DDIAS/PSMD3/CDK6/ZWILCH/CHEK1/CCNB1/NKX3-1/KNTC1/PCNA/CCND1/ARID3A/EZH2/CHEK2/TICRR/GEN1/PRKDC/BRCA1/BCL2L1/RBL1/PTTG1/RFWD3/BMP4/FBXO5/SPDL1/KIF25/MIIP/DONSON/SCRIB/PSMB9/CASP2/PNPT1/MAD1L1/RAD9A/MUC1/XRCC3/BUB3/DCLRE1B/MSH2/C…
BP	GO:0000082	G1/S transition of mitotic cell cycle	0.363341	1.48566	0.0232237	CCNE1/TRIM71/CDKN2A/TERT/KIF14/INHBA/IQGAP3/CDC6/MCM10/GTSE1/E2F1/E2F7/CDK1/USP26/SOX4/AURKA/CDC25C/CDKN3/CDC25A/ORC6/CDT1/CDC45/MCM4/ORC1/MTBP/RCC1/MCM2/RRM2/CDK6/CCNB1/DBF4/BCAT1/TYMS/MCM8/MCM7/PCNA/BID/CCND1/ARID3A/CDC7/EZH2/CHEK2/SKP2/POLE2/PRKDC/RBL1/RFWD3/MCM3/FBXO5/PPAT/MCM5/PRIM2/MCM6/CCNE2/CASP2/MUC1/POLE/CDK3/EIF4EBP1/RBBP8/CNOT11/SPDYA/CDK10/MDM2/E2F8/BAX/NASP/DACT1/RPA4/CDK2AP2/PTPN6/…
BP	GO:1902749	regulation of cell cycle G2/M phase transition	0.362474	1.45686	0.0441845	HMGA2/KIF14/TPX2/CDC6/CLSPN/NEK2/CENPF/GTSE1/CDK1/CDC25B/AURKA/PLK1/CDC25C/AURKB/CDC25A/DTL/BLM/CEP72/ORC1/HMMR/PSMD3/PLK4/RCC2/CHEK1/CCNB1/ATAD5/CCND1/CDC7/TICRR/BRCA1/ODF2/CEP131/FBXO5/HAUS7/MIIP/DONSON/PSMB9/DBF4B/CKAP5/SFI1/FGFR1OP/PSMD11/PSMB8/PSMB2/PSMC4/TOPBP1/PSMD14/TUBB/PSMD1/CEP250/CEP152/HAUS5/TUBG1/HSP90AA1/CDK5RAP3/TP53/HAUS6/CDK2/PINX1/HAUS2/HAUS8/PSME3/PSMF1/GPR132/PSME4/CEP78/CEP1…
BP	GO:0072331	signal transduction by p53 class mediator	0.360362	1.48537	0.0199122	POU4F1/MAGEA2/MAGEA2B/ANKRD1/TPX2/FOXM1/GTSE1/E2F1/E2F7/CDK1/SOX4/AURKA/EXO1/CDC25C/BRCA2/AURKB/DNA2/BLM/BOP1/NOP2/BRIP1/CHEK1/CCNB1/RFC3/ATAD5/PCNA/RMI2/ARID3A/CHEK2/BATF/BRCA1/BCL2L12/TFAP4/RRS1/SNAI1/NOC2L/CASP2/TAF4/PYCARD/RFC4/RAD9A/MUC1/HDAC1/MYBBP1A/MSX1/NUAK1/MSH2/EHMT2/E2F2/RBBP8/AEN/CNOT11/CD74/MYO6/TOPBP1/MDM2/E2F8/RMI1/BAX/SSRP1/PAK1IP1/CSNK2A1/TRIM24/ANKRD2/SPRED3/TAF2/CDK5RAP3/TP53/…
BP	GO:0019058	viral life cycle	0.358027	1.50781	0.0129169	CLDN6/IFNL3/HAVCR1/CLDN9/HMGA2/TOP2A/CLDN1/IFNB1/APOE/CDK1/APCS/PROX1/TRIM31/TRIM10/CLEC5A/SLC52A2/CXCL8/OAS3/SCARB1/LAMP3/KPNA2/SLC1A5/ITGB6/NECTIN2/CTSB/IFITM1/ISG15/ICAM1/TRIM15/NDC1/NUP210/PVR/ITGA2/F11R/CD80/LRRC15/FAM111A/NUP155/AICDA/CD55/GRK2/CR2/MX1/TRIM59/TNFRSF4/NUP62/NUP188/CCR5/IFITM3/PARP10/NUP107/LGALS9/GYPA/FURIN/ADAR/MORC2/TFRC/RSAD2/CD74/TRIM11/TRIM28/HSP90AB1/NUP43/APOBEC3H/XPR…
BP	GO:0022412	cellular process involved in reproduction in multicellular organism	0.35253	1.49583	0.0112179	PIWIL1/SOHLH1/IZUMO1R/SPANXB1/STRA8/NOBOX/FABP9/AMH/FAM9A/TDRD5/MEIKIN/LGR5/TOP2A/ZPBP2/M1AP/DDX4/INHBA/MAEL/TRIP13/BOLL/TEX19/PABPC1L/YBX2/PAEP/FAM9C/SEMG1/CDC25B/SPAG6/FOXC1/FANCA/AURKA/KNL1/KIF18A/NCAPH/PLK1/ASPM/INHBB/BRCA2/PRM2/TXNDC8/CFAP157/ZMYND15/TTK/SEMG2/ADAM2/SYCP2/SPATA46/MDK/ZP3/BRIP1/SLC26A8/ANGPT2/HORMAD1/NECTIN2/NPM2/CCNB1/CCDC155/IHH/FOSL1/FAM9B/TUBB8/SLC26A6/FSHB/CFTR/REC8/CFAP…
BP	GO:0000086	G2/M transition of mitotic cell cycle	0.35132	1.43648	0.0446503	HMGA2/KIF14/TPX2/PKMYT1/CDC6/CLSPN/FOXM1/NEK2/CENPF/CDK1/CDC25B/AURKA/MELK/PLK1/CDC25C/AURKB/CDC25A/DTL/BLM/CIT/CEP72/ORC1/CCNB2/HMMR/PSMD3/CCNA2/PLK4/BORA/RCC2/CCNB1/CCND1/CDC7/CHEK2/SKP2/TICRR/MASTL/BRCA1/ODF2/CEP131/FBXO5/HAUS7/USH1C/MIIP/DONSON/PSMB9/DBF4B/CKAP5/SFI1/FGFR1OP/PSMD11/PSMB8/PSMB2/PSMC4/TOPBP1/PSMD14/TUBB/PSMD1/CEP250/AJUBA/FBXL18/CEP152/HAUS5/TUBG1/HSP90AA1/BRSK2/TAF2/CDK5RAP3/H…
BP	GO:0045089	positive regulation of innate immune response	0.349753	1.4925	0.0127655	MUC16/MUCL1/FGB/MUC5B/LBP/ULBP1/MUC12/FGG/ACOD1/GBP5/MUC4/MMP12/TNIP3/ULBP2/IFNB1/HMGB3/ADAM8/AIM2/TREML4/PRKACG/MUC19/KRAS/CARD11/S100A1/NLRC5/CGAS/UNC93B1/CD300LF/PIK3AP1/IRAK1/PSMD3/HAVCR2/SFTPA2/RIPK2/MICB/NECTIN2/IRAK2/IFNK/LYN/CTSB/CLEC6A/INAVA/TRIM15/PVR/LAG3/TLR2/SRC/PRKDC/CARD9/SH2D1B/MFHAS1/HSPD1/MUC13/MUC3A/ITGB2/IFIH1/ULBP3/MUC17/DMBT1/RELB/HLA-F/PSMB9/FCER1G/IRF3/MUC20/PYCARD/CASP8/E…
BP	GO:0051604	protein maturation	0.349535	1.47386	0.0167133	CGB3/MAGEA3/CPN1/BIRC7/C4BPA/NAA11/FGB/KLK6/CFHR4/MELTF/FGG/NKD2/PLAU/C8B/APOH/COMP/CPXM1/SERPINE1/ADAMTS2/ADAM8/SOX4/CFHR2/CD5L/CORIN/C2/C9/C8A/C4BPB/F2/PCSK9/CPZ/ASTL/MMP14/SERPINH1/RIPK2/F7/CFB/IHH/TESC/ASPRV1/NLRP7/FSHB/SERPINF2/CTSH/SRC/BCL2L12/HSPD1/C4A/C3/ECE2/AANAT/C4B/ADAM10/CLN3/CD55/PRSS3/CR2/MYRF/CASP2/BOLA2B/HJV/CPD/LHB/PYCARD/CASP8/NAA40/GGT1/RFX4/CUZD1/CPM/RCE1/FURIN/CTSZ/HM13/CTSS…
BP	GO:0045787	positive regulation of cell cycle	0.348706	1.48618	0.0127655	HMGA2/CCNE1/POU4F1/FOXE3/MAPK15/TERT/DRD2/KIF14/UBE2C/CDC6/NR2E1/FAP/GTSE1/KIF23/E2F1/CDCA5/E2F7/CDK1/SSTR5/EGF/CDC25B/SOX4/PROX1/SPAG5/ECT2/MLXIPL/AURKA/CDC25C/GDPD5/NDC80/BRCA2/FGF8/AURKB/CDC25A/DTL/CDT1/DLGAP5/CDC45/MSX2/CIT/PRDM9/MTBP/RXFP3/NUSAP1/MAD2L1/INSM1/PLK4/POC1A/RCC2/CHEK1/NPM2/CCNB1/IGF2/CKS2/NKX3-1/FOSL1/DBF4/ATAD5/DDX11/PCNA/KIF20B/CCND1/ARID3A/CDC7/PSRC1/FEN1/EZH2/TAS1R2/CHEK2/LF…
BP	GO:0044839	cell cycle G2/M phase transition	0.348608	1.43532	0.0401768	HMGA2/KIF14/TPX2/PKMYT1/CDC6/CLSPN/FOXM1/NEK2/CENPF/GTSE1/CDK1/CDC25B/AURKA/MELK/PLK1/CDC25C/AURKB/CDC25A/DTL/BLM/CIT/CEP72/ORC1/CCNB2/HMMR/PSMD3/CCNA2/PLK4/BORA/RCC2/CHEK1/CCNB1/ATAD5/CCND1/CDC7/CHEK2/SKP2/TICRR/MASTL/BRCA1/ODF2/CEP131/FBXO5/HAUS7/USH1C/MIIP/DONSON/PSMB9/DBF4B/CKAP5/SFI1/FGFR1OP/PSMD11/PSMB8/PSMB2/PSMC4/TOPBP1/PSMD14/TUBB/PSMD1/CEP250/AJUBA/FBXL18/CEP152/HAUS5/TUBG1/HSP90AA1/BRS…
BP	GO:0044843	cell cycle G1/S phase transition	0.34854	1.43293	0.0431775	CCNE1/TRIM71/CDKN2A/TERT/KIF14/INHBA/IQGAP3/CDC6/MCM10/GTSE1/E2F1/E2F7/CDK1/USP26/SOX4/AURKA/CDC25C/CDKN3/CDC25A/ORC6/CDT1/CDC45/MCM4/ORC1/MTBP/RCC1/MCM2/RRM2/CCNA2/CDK6/CCNB1/DBF4/BCAT1/TYMS/MCM8/MCM7/PCNA/BID/CCND1/ARID3A/CDC7/EZH2/CHEK2/SKP2/POLE2/PRKDC/RBL1/RFWD3/MCM3/FBXO5/PPAT/MCM5/PRIM2/MCM6/CCNE2/CASP2/MUC1/POLE/GLI1/CDK3/EIF4EBP1/RBBP8/MEN1/CNOT11/SPDYA/DDRGK1/CDK10/MDM2/E2F8/BAX/NASP/DA…
BP	GO:0022409	positive regulation of cell-cell adhesion	0.348287	1.42744	0.045696	FGB/FGG/CD70/KIF26B/PTPRU/ADAM8/TNFSF11/TNFSF9/MYB/ALOX15/IFNG/CEACAM6/RUNX1/CARD11/LILRB4/FOXP3/GATA3/THY1/CD274/ITGA6/IRAK1/MDK/ZP3/HAVCR2/RIPK2/IGF2/IHH/LYN/RUNX3/ICAM1/VNN1/IL2RA/SERPINF2/SRC/JAK3/CD276/EFNB1/CD80/HSPD1/ITGB2/PODXL/TNFSF4/LCK/CTLA4/FAM49B/CD55/MYO10/EPO/FOXA1/CBFB/SIRPB1/PYCARD/RAG1/HSPH1/CCDC88B/HLA-G/PTAFR/LGALS9/RNASE10/IL12RB1/SOCS1/TFRC/ETS1/CD74/PDCD1/SIRPA/SPTA1/TNFRSF…
BP	GO:0090305	nucleic acid phosphodiester bond hydrolysis	0.348217	1.45113	0.0287051	PIWIL1/STK31/RNASE8/RNASE2/EME1/DNASE2B/RNASE9/PNLDC1/EXO1/HELZ2/DNA2/RPP25/BOP1/DNASE1L2/PGBD5/POP1/POLD1/HORMAD1/POLD3/LACTB2/RFC3/ATAD5/PCNA/FEN1/RNASEH2A/GEN1/MEIOB/PIWIL2/SLX1A/MGME1/ERN2/RRS1/AZGP1/SLFN13/RNASET2/PRORP/CPSF4L/SLX1B/ERI1/PNPT1/EXOSC5/EXOSC4/RAG1/TSEN54/RFC4/RAD9A/CPSF1/POLE/RNASE3/DCLRE1B/APEX2/RNASE10/RBBP8/AEN/DCLRE1A/NOP14/DCLRE1C/MOV10/CSTF2/PIWIL4/DFFB/APAF1/ST20/POP4/B…
BP	GO:0045088	regulation of innate immune response	0.34524	1.49435	0.00951053	MUC16/MUCL1/FGB/MUC5B/LBP/ULBP1/MUC12/FGG/ACOD1/TREM2/GBP5/DRD2/MUC4/MMP12/TNIP3/ULBP2/IFNB1/HMGB3/ADAM8/APOE/AIM2/TREML4/PRKACG/MUC19/LRP8/IFNG/KRAS/CARD11/S100A1/NLRC5/CGAS/UNC93B1/SLAMF8/CD300LF/PARP14/PIK3AP1/IRAK1/PSMD3/HAVCR2/SFTPA2/STAT1/RIPK2/MICB/NECTIN2/IRAK2/IFNK/LYN/CTSB/CLEC6A/CEACAM1/INAVA/TRIM15/PVR/LAG3/TLR2/SERPINB9/SRC/PRKDC/CARD9/SH2D1B/MFHAS1/HSPD1/MUC13/MUC3A/ITGB2/IFIH1/ULBP…
BP	GO:0010948	negative regulation of cell cycle process	0.34487	1.45421	0.0194101	HMGA2/CDKN2A/FOXE3/LIF/TRIP13/CDC6/CLSPN/NEK2/CENPF/GTSE1/E2F1/BUB1/E2F7/CDK1/SOX4/MLXIPL/BUB1B/FBXO43/AURKA/PLK1/CDC25C/NDC80/CDC20/AURKB/DTL/BLM/CDT1/CCNF/RAD51/TTK/ORC1/MTBP/MAD2L1/RRM2/PSMD3/CDK6/HORMAD1/CHEK1/CCNB1/PCNA/CCND1/ARID3A/CDC7/EZH2/CHEK2/TICRR/GEN1/PRKDC/BRCA1/RBL1/PTTG1/TFAP4/KAT2A/RFWD3/BMP4/FBXO5/DMRT1/SPDL1/KIF25/MIIP/DONSON/PSMB9/CASP2/MAD1L1/CBX3/MUC1/HLA-G/XRCC3/BUB3/EHMT2/…
BP	GO:0007389	pattern specification process	0.34148	1.47798	0.00951053	FEZF1/HOXC10/PAX2/HOXC11/HOXA11/EVX1/SP8/HOXC13/LBX1/LEFTY1/GBX2/SIX3/HOXC9/FOXJ1/HOXD13/HOXD11/HOXA10/HOXC8/WNT2/FOXH1/HOXA9/HES3/LHX1/TDRD5/ALX1/RIPPLY1/HOXD12/MESP2/OTX1/HOXB9/SIX1/EN1/WNT8B/LMX1B/HOXD10/EMX1/STIL/LRP2/DNAH5/FOXC1/MDFI/AURKA/PAX8/LHX2/RIPPLY3/MYF6/HNF1B/FGF8/XRCC2/ADGRG1/MSX2/HOXC6/AXIN2/DLL3/HES6/TDGF1/EOMES/FOXD1/RNF207/SATB2/CDX1/ZIC1/TCAP/IHH/NKX3-1/CDX2/HOXB7/DRC1/PAX7/LF…
BP	GO:0051052	regulation of DNA metabolic process	0.341346	1.47214	0.00951053	HMGA2/STPG4/ANKRD1/MAPK15/H1-6/CDC6/FGFR4/FOXM1/NEK2/E2F7/CDK1/PRKCG/AUNIP/H1-8/DSCC1/BRCA2/RAD51AP1/AURKB/DNA2/BLM/CDT1/RAD51/FOXP3/FANCB/CHTF18/UCN/PRDM9/CGAS/AXIN2/GATA3/TIMELESS/POLQ/KPNA2/CCNA2/ESCO2/GDF2/MCIDAS/CHEK1/NPM2/RFC3/DBF4/DKC1/ATAD5/DDX11/PCNA/NSD2/PIF1/RMI2/CDC7/H1-5/CHEK2/TICRR/GTPBP4/SRC/SPIRE2/PRKDC/DNMT1/H2AX/BRCA1/CBX8/PDGFB/HDAC10/SLX1A/H1-3/PARPBP/PDGFRB/CCT5/DNAJC2/TNFSF4…
CC	GO:0000790	nuclear chromatin	0.341134	1.45572	0.0193084	ZFP42/EN2/SCRT2/POU4F1/FOXH1/H3C12/H1-6/EN1/HMGB3/E2F1/EME1/CDCA5/FOXC1/UHRF1/CENPA/RAD51AP1/RAD51/H2AC4/H2AC17/RCC1/GATA3/ASF1B/TIMELESS/H3C10/H3C8/H3C11/EOMES/H2AW/ESCO2/STAT1/H4C12/H4C14/DPF1/NPM2/H2AC16/CHAF1A/KLF1/DDX11/H2AC13/EZH2/RUNX3/CHAF1B/H1-5/H2AC12/H4C13/H2AC11/KMT5C/H2AX/CBX8/ANP32E/NCAPD3/TCF7/H4C1/H2AC8/H1-3/KAT2A/H4C8/TCF3/H4C15/BRMS1/H4C4/H3-4/SINHCAF/CDK12/H3C4/H2AC19/IPO4/CREB…
MF	GO:0005126	cytokine receptor binding	0.340637	1.41563	0.0461051	LEFTY1/CSF2/CCL7/CSH2/BAMBI/IFNA8/BMP15/IL9/IFNA1/CXCL9/CXCL10/AMH/CXCL6/IFNE/LIF/CXCL11/CD70/INHBA/CXCL1/IL3/GDF15/IL37/IL11/IFNB1/CCL15/CXCL5/TNFSF11/BMP8A/CCL18/TNFSF9/INHBB/TNFSF15/IFNG/CCL20/CXCL8/IFNL1/GATA3/IL27/CXCL16/CD300LF/IFNA5/CCL3/TNFSF18/STAT1/GDF2/IFNK/BID/PGF/TRAF2/GH2/OSM
MF	GO:0004175	endopeptidase activity	0.338346	1.4567	0.0110039	PRSS41/PRSS58/PYDC1/MMP8/PRSS33/MMP13/MMP11/KLK6/PRSS21/HP/MMP3/ADAMTS14/ADAMTS20/MMP7/PIP/KLK5/PLAU/ADAM12/HTRA4/ADAMTS12/MMP12/MMP10/KLK4/PROC/TMPRSS5/FAP/ADAMTS2/ADAM8/ECEL1/CTRB2/USP26/PRSS56/ADAMTS18/MMP9/CAPN12/CTRB1/CORIN/C2/HABP2/GZMB/TRABD2A/MMP20/F2/ADAM2/PCSK9/ADAM18/USP17L7/USP17L4/PRSS55/TMPRSS4/ASTL/HPR/MMP14/ADAM30/MMP24/F7/TMPRSS3/ADAM32/CFB/PRSS22/ASPRV1/KLK15/CTSB/BMP1/PLG/PROZ/…
BP	GO:0048568	embryonic organ development	0.337975	1.45972	0.00951053	PAX2/HOXC11/HOXA11/STRA6/COL11A1/LBX1/EN2/GBX2/CSF2/SIX3/HOXC9/WNT2/FOXH1/CTHRC1/ASCL2/GCM1/LHX1/RBP4/ALX1/LIF/EPHB2/WNT11/SHOX2/IL3/APELA/OTX1/SIX1/EN1/HOXD10/STIL/NKX2-6/FOXI1/E2F7/MTHFD1L/MFAP2/PROX1/FOXC1/MDFI/DLX6/PAX8/SOX9/HNF1B/FGF8/SIX4/CXCL8/PTK7/GATA3/TBX15/CEBPA/MYO7A/PHLDA2/ATP6V1B1/MMP14/EOMES/TTPA/PLK4/HMX3/COL5A2/RNF207/SATB2/IGF2/ZIC1/TCAP/IHH/CDX2/HOXB7/CHD7/EFNA1/ST14/SPINT2/PDG…
BP	GO:0002218	activation of innate immune response	0.333993	1.40375	0.0405219	MUC16/MUCL1/FGB/MUC5B/LBP/MUC12/FGG/ACOD1/MUC4/TNIP3/AIM2/TREML4/PRKACG/MUC19/KRAS/CARD11/S100A1/CGAS/UNC93B1/CD300LF/PIK3AP1/IRAK1/PSMD3/HAVCR2/SFTPA2/RIPK2/IRAK2/LYN/CTSB/CLEC6A/INAVA/TRIM15/TLR2/SRC/PRKDC/CARD9/MFHAS1/HSPD1/MUC13/MUC3A/ITGB2/IFIH1/MUC17/DMBT1/RELB/PSMB9/FCER1G/IRF3/MUC20/PYCARD/CASP8/MUC1/MUC2/PSMD11/RSAD2/PSMB8/PSMB2/IRF7/PSMC4/CTSS/IRF1/CNPY3/PSMD14/SMPDL3B/PSMD1/LILRA4/XIAP…
BP	GO:0002429	immune response-activating cell surface receptor signaling pathway	0.333057	1.41424	0.0223511	MUC16/MUCL1/MUC5B/MUC12/MUC4/FCGR1A/FCGR3A/PRKACG/MUC19/VAV2/RUNX1/KRAS/CARD11/LILRB4/FOXP3/LIMK1/GATA3/THY1/SLC39A10/PSMD3/RIPK2/MICB/NECTIN2/TNFRSF21/LYN/ARPC1B/KCNN4/CLEC6A/CEACAM1/SRC/CD276/CARD9/CACNA1F/GBP1/MUC13/MUC3A/PAX5/FYB1/INPP5D/HLA-DQB1/LCK/MUC17/CTLA4/HLA-DRB5/MYO10/RELB/NFAM1/CR2/BTN1A1/PRAM1/CBFB/PSMB9/FCER1G/MUC20/MUC1/FCGR2A/MUC2/BTN3A1/HLA-DQA1/PTPRJ/HLA-DRB1/PSMD11/LIME1/EZR/…
BP	GO:1901990	regulation of mitotic cell cycle phase transition	0.329318	1.41585	0.0193084	HMGA2/CCNE1/CDKN2A/UBD/TERT/KIF14/UBE2C/TPX2/TRIP13/CDC6/CLSPN/NEK2/CENPF/GTSE1/E2F1/BUB1/CDCA5/E2F7/CDK1/CDC25B/SOX4/ANLN/BUB1B/AURKA/PLK1/CDC25C/NDC80/CENPE/CDC20/AURKB/CDC25A/DTL/BLM/CDT1/DLGAP5/CDC45/TTK/CEP72/ORC1/MTBP/MAD2L1/HMMR/PSMD3/CDK6/PLK4/RCC2/NPM2/CCNB1/KNTC1/ATAD5/PCNA/BID/CCND1/ARID3A/CDC7/EZH2/CHEK2/TICRR/GEN1/PRKDC/BRCA1/RBL1/TFAP4/RFWD3/NEK6/ODF2/CEP131/FBXO5/HAUS7/SPDL1/MIIP/D…
BP	GO:0002697	regulation of immune effector process	0.324324	1.39066	0.0291922	CPN1/APOA2/C4BPA/FOXJ1/CFHR4/LBP/ULBP1/KLK5/CXCL6/RBP4/C8B/MMP12/ULBP2/IFNB1/AIM2/CFHR2/MYB/CD5L/IFNG/C2/C9/FOXP3/C8A/C4BPB/IFNL1/F2/CGAS/GATA3/SLAMF8/IL27/IL13RA2/ZP3/HAVCR2/STAT1/RIPK2/SEMA7A/MICB/NECTIN2/CFB/LYN/ATAD5/ADGRE2/NSD2/CEACAM1/SPON2/TRAF2/TRIM15/IL2RA/PVR/LAG3/SERPINB9/PRKDC/ZNF683/JAK3/SH2D1B/CD80/HSPD1/C4A/C3/ITGB2/TRPM4/DDX21/CD1B/ULBP3/HLA-A/TNFSF4/C4B/DTX3L/UNC13D/FAM49B/IL27RA…
BP	GO:0048608	reproductive structure development	0.320969	1.38615	0.0277123	ZFP42/HOXA11/STRA6/CSF2/MC2R/HOXD13/HOXA10/WNT2/BMP15/ASCL2/GCM1/HOXA9/LHX1/COL9A3/SPP1/AMH/RBP4/LIF/AFP/INHBA/APELA/TCF23/CYP19A1/TEX19/HSD17B3/LRP2/E2F7/CYP27B1/HOXB13/PRKACG/FOXC1/MDFI/FANCA/KIF18A/ASPM/INHBB/SOX9/BRCA2/FGF8/SIX4/ADGRG1/CCNF/SULF1/SYCP2/GATA3/CEBPA/PLAC1/PHLDA2/MMP14/EOMES/TTPA/ZP3/BRIP1/PLK4/STC2/BIK/IGF2/RAD21L1/GJB1/NKX3-1/FOSL1/CDX2/CTSB/CCND1/CHD7/FSHB/LHX9/ICAM1/REC8/VGF…
BP	GO:0061458	reproductive system development	0.318709	1.377	0.0277123	ZFP42/HOXA11/STRA6/CSF2/MC2R/HOXD13/HOXA10/WNT2/BMP15/ASCL2/GCM1/HOXA9/LHX1/COL9A3/SPP1/AMH/RBP4/LIF/AFP/INHBA/APELA/TCF23/CYP19A1/TEX19/HSD17B3/LRP2/E2F7/CYP27B1/HOXB13/PRKACG/FOXC1/MDFI/FANCA/KIF18A/ASPM/INHBB/SOX9/BRCA2/FGF8/SIX4/ADGRG1/CCNF/SULF1/SYCP2/GATA3/CEBPA/PLAC1/PHLDA2/MMP14/EOMES/TTPA/ZP3/BRIP1/PLK4/STC2/BIK/IGF2/RAD21L1/GJB1/NKX3-1/FOSL1/CDX2/CTSB/CCND1/CHD7/FSHB/LHX9/ICAM1/REC8/VGF…
BP	GO:1901987	regulation of cell cycle phase transition	0.317618	1.37417	0.0327419	HMGA2/SIX3/CCNE1/CDKN2A/UBD/MAPK15/TERT/KIF14/UBE2C/TPX2/TRIP13/CDC6/CLSPN/NEK2/CENPF/GTSE1/E2F1/BUB1/CDCA5/E2F7/CDK1/CDC25B/SOX4/ANLN/BUB1B/AURKA/PLK1/CDC25C/NDC80/CENPE/CDC20/AURKB/CDC25A/DTL/BLM/CDT1/DLGAP5/CDC45/TTK/CEP72/ORC1/MTBP/MAD2L1/HMMR/PSMD3/CDK6/PLK4/RCC2/CHEK1/NPM2/CCNB1/DBF4/KNTC1/ATAD5/PCNA/BID/CCND1/ARID3A/CDC7/EZH2/CHEK2/TICRR/GEN1/PRKDC/BRCA1/RBL1/TFAP4/RFWD3/NEK6/ODF2/CEP131/F…
MF	GO:0048018	receptor ligand activity	0.316468	1.37692	0.0235072	CGB3/INSL5/FGF3/FGF19/IFNL3/IFNL2/LEFTY1/SAA4/CSF2/CCL7/CSH2/WNT2/NTS/IFNA8/BMP15/SAA2/IL9/IFNA1/CXCL9/IL17C/SPP1/CXCL10/AMH/CXCL6/IFNE/INSL6/LIF/FGF21/SAA1/CXCL11/CD70/INHBA/CXCL1/IL3/APELA/UTS2/GDF15/IL37/WNT8B/IL11/APLN/IFNB1/ERFE/CCL15/TNFRSF11B/CXCL5/FGF20/TNFSF11/AGT/EGF/TYMP/BMP8A/SCGB3A1/CCL18/TNFSF9/SEMA5B/ADM2/INHBB/TNFSF15/CGB7/FGF8/IFNG/CCN6/CCL20/PROK1/CXCL8/TIMP1/CGB2/UCN2/PRLH/IFNL…
BP	GO:0070838	divalent metal ion transport	-0.286488	-1.32745	0.0364294	RAMP1/BCL2/PDE4D/CDH23/CATSPER4/GJC2/PKD1/HTR2B/PRNP/CAMK2G/RGS9/IL13/TRPV6/ITPR1/AHNAK/BHLHA15/CACNG2/CCL21/TUSC3/SLC24A4/NMUR1/CCL2/P2RY12/JPH3/TMC1/HAP1/CRHR1/PRKCB/CYSLTR1/GRIN2A/CACNA2D1/CAMK2B/BDKRB1/CALHM1/TRPM3/RRAD/PKD2/SNCA/JPH4/GJA1/GPER1/CXCL12/GCK/LPAR3/DHRS7C/GEM/SLC30A8/WNK3/CRHR1/EHD3/SLC8A3/CHRNA4/FFAR1/PDE2A/CAV1/SLN/SLC8A1/STAC/NCS1/SLC39A2/ADRA1A/RYR2/GSTM2/TRPC1/CACNA1B/CASR/…
BP	GO:0090066	regulation of anatomical structure size	-0.287049	-1.33447	0.029808	EDN3/CHRM3/ULK2/HTR2B/ACE2/NGF/OLFM1/LRRK2/SEMA3E/PTPRS/KANK1/FGF13/SCIN/GUCY1A1/DCC/HTR1A/CCL21/HTR1B/SCT/TMOD2/ADCYAP1/UTS2B/FHOD3/NTRK3/SEMA3D/ILK/HTR7/CSF3/P2RY1/HRH2/RND2/CRABP2/SEMA6D/ITGA1/GJA1/GPER1/CXCL12/LPAR3/GSN/AKT3/RET/SPART/DSTN/NPR1/POU4F2/WASF1/INS/ADRB2/PRKG1/AVPR1A/AVP/CAV1/SLC8A1/RGS2/CHGA/ADRA1A/CASR/EDN2/LMOD3/SCTR/WNT3A/MAPT/MAP1B/NTN1/MTNR1B/ACTA2/NOS1/TENM1/CNTN2/SLIT2/HB…
BP	GO:0072511	divalent inorganic cation transport	-0.290821	-1.34954	0.0294235	GJC2/PKD1/HTR2B/PRNP/CAMK2G/RGS9/IL13/TRPV6/ITPR1/AHNAK/BHLHA15/CACNG2/CCL21/TUSC3/SLC24A4/NMUR1/CCL2/P2RY12/JPH3/TMC1/HAP1/CRHR1/PRKCB/CYSLTR1/GRIN2A/CACNA2D1/CAMK2B/BDKRB1/CALHM1/TRPM3/RRAD/PKD2/SNCA/JPH4/GJA1/GPER1/CXCL12/GCK/LPAR3/DHRS7C/GEM/SLC30A8/WNK3/CRHR1/EHD3/SLC8A3/CHRNA4/FFAR1/PDE2A/CAV1/SLN/SLC8A1/STAC/NCS1/SLC39A2/ADRA1A/RYR2/GSTM2/TRPC1/CACNA1B/CASR/ATP2B4/CACNA1C/RGS4/CACNA2D3/WNT…
BP	GO:0043434	response to peptide hormone	-0.295381	-1.35898	0.0291295	CA2/CSHL1/GAB1/SOCS2/GNRHR/SOCS3/LPL/SLC34A1/PKLR/GNAI1/TIMP4/MZB1/NR4A1/KANK1/REG1A/KHK/GPLD1/PCK1/MSTN/CRHR1/KAT2B/PRKCB/MGARP/CYP11B2/GH1/GJA1/GPER1/APOBEC1/CXCL12/KL/GCK/PID1/GJB2/POU4F2/CRHR1/INS/TGFBR3/CRHBP/CAV1/EGR1/OTOP1/CDO1/TFF1/GLP2R/IRS4/ANXA1/PRKAR2B/MAP1B/CYP11A1/ATP6V1G2/IRS4/LHCGR/NR4A3/TRARG1/GHR/BTG2/ADCY5/MC4R/ADCY2/PTPRN/CPEB1/ARG1/KLF15/ADCY8/NKX6-1/GHSR/SORBS1/AGTR1/ADIPOQ/…
BP	GO:0006816	calcium ion transport	-0.30099	-1.38318	0.0289514	RAMP1/BCL2/PDE4D/CDH23/CATSPER4/GJC2/PKD1/HTR2B/PRNP/CAMK2G/RGS9/IL13/TRPV6/ITPR1/AHNAK/BHLHA15/CACNG2/CCL21/SLC24A4/NMUR1/CCL2/P2RY12/JPH3/TMC1/HAP1/CRHR1/PRKCB/CYSLTR1/GRIN2A/CACNA2D1/CAMK2B/BDKRB1/CALHM1/TRPM3/RRAD/PKD2/SNCA/JPH4/GJA1/GPER1/CXCL12/GCK/LPAR3/DHRS7C/GEM/WNK3/CRHR1/EHD3/SLC8A3/CHRNA4/FFAR1/PDE2A/CAV1/SLN/SLC8A1/STAC/NCS1/ADRA1A/RYR2/GSTM2/TRPC1/CACNA1B/CASR/ATP2B4/CACNA1C/RGS4/CA…
BP	GO:0010975	regulation of neuron projection development	-0.303917	-1.41342	0.0150011	NTRK1/SEMA6A/MEF2C/LGALS1/FSTL4/ABL1/BRSK1/OBSL1/ZEB2/BAIAP2/DLG4/MCF2/KEL/MYO9A/PAK3/MAG/NFE2L2/RIMS2/CAMK1/SDC2/DENND5A/PTPRD/IL1RAPL1/SEMA3A/NTRK2/SRF/SLC39A12/SEMA6C/PRKD1/MAP2/MARK1/TENM3/EPHA4/EFNB3/RAP1A/KLF4/NR2F1/OSTN/NFATC4/ULK2/NDNF/NGF/OLFM1/GRIP1/LPAR1/LRRK2/PMP22/TIAM1/SEMA3E/PTPRS/KANK1/VLDLR/REG1A/FGF13/FEZ1/DCC/FGFR1/ATP8A2/ADCYAP1/NTRK3/SEMA3D/ILK/CAMK2B/RIMS1/IL2/EPHA3/DPYSL3/A…
BP	GO:0051961	negative regulation of nervous system development	-0.306525	-1.36828	0.0473857	SEMA6A/ISL2/LGALS1/FSTL4/GPR37L1/BRINP1/MCF2/GPR173/MAG/ERBB4/ID3/DENND5A/SEMA3A/NKX2-2/CCL11/SEMA6C/BMPR1A/MAP2/CNTN4/EPHA4/EFNB3/NR2F1/OSTN/NFATC4/ULK2/SOX2/LPAR1/LRRK2/PMP22/SEMA3E/PTPRS/KANK1/DLX1/FGF13/DCC/ID4/ADCYAP1/THRB/PBX1/NTRK3/SEMA3D/DPYSL3/BMERB1/CEND1/SEMA6D/HOXA2/LMX1A/SPART/POU4F2/NRG3/GLI3/ISL1/ASCL1/TLX3/PRTG/MEIS1/ZNF536/DAAM2/WNT3A/NTN1/RGMA/DIXDC1/CNTN2/SLIT2/PTN/SOX3/NLGN1/I…
CC	GO:0043235	receptor complex	-0.307969	-1.40603	0.0216794	IL11RA/ABCG8/AMHR2/VLDLR/GRIA3/CACNG2/FGFR1/LEPR/NT5DC3/HTR3B/NTRK3/GRIN2A/GABBR1/BMPR1B/EPHA3/GH1/ITGA1/NRP2/SHISA6/CD36/RET/ITGA9/GRIK1/NPR1/CHRNA2/GPR62/ADRB2/TGFBR3/CHRNA4/CHRNB4/DDR2/ITGA8/ROR2/TRPC1/ITGA7/PTH1R/KIT/GRIA1/GFRA1/SLITRK5/ALK/GRIA4/MTTP/GHR/DLG2/CACNG7/NLGN1/GRIK5/CHRNA3/IL6/GFRA2/P2RX2/SORBS1/FSHR/LRP1B/GABRG1/IMPG2/GFRA3/EPHA5/GPR119/GRIK2/ADRB3/GRIK3/SHISA9/ADCYAP1R1/GRID2/K…
BP	GO:0031346	positive regulation of cell projection organization	-0.311683	-1.41636	0.0182732	PPP1R9A/SYT1/NTRK1/DOCK11/OBSL1/ZEB2/BAIAP2/DLG4/PAK3/NFE2L2/RIMS2/NAV3/CAMK1/C15orf62/PTPRD/PALM/IL1RAPL1/NTRK2/TENM2/SRF/HDAC4/PRKD1/TENM3/EPHA4/RAP1A/SAXO1/NDNF/NGF/GRIP1/LPAR1/TIAM1/VLDLR/REG1A/FEZ1/CCL21/FGFR1/ATP8A2/MSTN/P2RY12/HAP1/ADCYAP1/NTRK3/ILK/CAMK2B/RIMS1/IL2/EPHA3/DPYSL3/ARMCX5-GPRASP2/RND2/CRABP2/APBB1/CPNE6/CXCL12/BMP5/LPAR3/RET/SLITRK1/POU4F2/INS/ALKAL2/NDRG4/RGS2/PRKN/CNR1/DZIP…
BP	GO:0006874	cellular calcium ion homeostasis	-0.312115	-1.44226	0.0147783	TSPOAP1/LPAR4/ACKR4/ACKR3/ESR1/P2RX1/CALM1/GPR20/ATP13A4/CCL11/GALR2/PDE6A/GNA15/GNG3/PTGER2/BCL2/HCRTR1/PDE4D/CDH23/BNIP3/S1PR3/EDN3/PKD1/HTR2B/PRNP/GPR32/IL13/SLC25A27/LPAR1/CXCR1/TRPV6/ITPR1/CCR10/CCL21/SLC24A4/HTR1B/ELANE/JPH3/HAP1/CRHR1/ADCYAP1/GPR33/PRKCB/CYSLTR1/GRIN2A/CACNA2D1/BDKRB1/IL2/P2RY1/PKD2/SNCA/TACR1/JPH4/GJA1/GPER1/CXCL12/CD36/LPAR3/DHRS7C/CALCB/CRHR1/SLC8A3/GPR17/CCL14/SCGN/AVP…
BP	GO:0007409	axonogenesis	-0.312147	-1.44698	0.0147783	NTRK1/SEMA6A/MYPN/ISL2/NR4A2/FSTL4/RANBP9/ABL1/BRSK1/ROBO3/ZEB2/BAIAP2/PTPRZ1/LAMB2/MCF2/KEL/RAB3A/PAK3/MAG/PTPRM/ENAH/SEMA3A/NTRK2/ADGRB1/PIK3R1/MATN2/GDNF/SRF/SEMA6C/MAP2/CNTN4/BCL2/EPHA4/EFNB3/GAB1/VCL/ATL1/ULK2/NEFH/LAMA2/NGF/OLFM1/LRTM2/DLX5/TIAM1/SEMA3E/PTPRS/VLDLR/FGF13/FEZ1/SLIT3/DCC/RPS6KA5/CHL1/ATP8A2/UCHL1/DPYSL5/BOC/NTRK3/SEMA3D/NKX2-8/ILK/PDLIM7/DOK6/ADARB1/BMPR1B/EPHA3/LRRC4C/RND2/N…
BP	GO:0055074	calcium ion homeostasis	-0.314989	-1.4592	0.0147783	TSPOAP1/LPAR4/ACKR4/ACKR3/ESR1/P2RX1/CALM1/GPR20/ATP13A4/CCL11/GALR2/PDE6A/GNA15/GNG3/PTGER2/BCL2/HCRTR1/PDE4D/CDH23/BNIP3/S1PR3/EDN3/PKD1/HTR2B/PRNP/GPR32/IL13/SLC25A27/LPAR1/CXCR1/TRPV6/S100A14/ITPR1/REG1A/CCR10/CCL21/SLC24A4/HTR1B/ELANE/JPH3/HAP1/CRHR1/ADCYAP1/GPR33/PRKCB/CYSLTR1/GRIN2A/CACNA2D1/BDKRB1/IL2/P2RY1/PKD2/SNCA/TACR1/JPH4/GJA1/GPER1/CXCL12/KL/CD36/LPAR3/DHRS7C/CALCB/CRHR1/SLC8A3/GPR…
BP	GO:0051051	negative regulation of transport	-0.315078	-1.46072	0.00952381	KCNAB1/LRRK2/ABCG8/SIAH3/TRIM9/PKIG/HTR1B/SCT/P2RY12/CRHR1/ADCYAP1/PIP4P2/DERL3/IL33/PRKCB/MAOB/RAB23/EPHA3/RRAD/P2RY1/PKD2/SNCA/CARD18/FABP5/CD36/GEM/PID1/YOD1/WNK3/CRHR1/INS/CRHBP/CAV1/SLN/PTGER3/RGS2/STXBP5L/CHGA/ANGPT1/PRKN/KCNH2/CNR1/GSTM2/ANXA1/NPY5R/SSC5D/RGS4/TFF2/FOXF1/MAP1B/CYP4F2/MTNR1B/NOS1/GNAO1/LRRTM1/CRYAB/SFRP1/GHSR/SH3GL3/ADIPOQ/APOA1/NEUROG1/AGTR2/TACR2/LEP/GPM6B/CIDEA/IL36RN/AC…
BP	GO:0001505	regulation of neurotransmitter levels	-0.315553	-1.42356	0.030764	SYN1/PPP1R9A/PIP5K1C/SYT1/PTGS2/MEF2C/BRSK1/MOXD1/TH/PRRT2/KLF2/GLUL/RAB3A/RGN/SV2A/STX2/SLC18A2/ERC2/RIMS2/GAD2/TSPOAP1/IL10/SLC29A1/P2RX1/ENPP6/NRXN2/GDNF/MAOA/RIMS3/RAP1A/KLF4/AMT/RPH3A/SYT11/CYP1B1/LRRK2/TRIM9/HTR1A/HTR1B/SLC1A7/SLC7A2/NAALAD2/PRKCB/GRIN2A/SYT9/SLC6A2/MAOB/RIMS1/RORA/P2RY1/PKD2/SNCA/GPER1/SLC1A6/CD36/PDE1B/SEPTIN5/PTGIS/SYN2/CHRNA4/RIMS4/CHRNB4/SLC17A7/PPFIA4/HDC/CHAT/CAV1/RG…
BP	GO:0006836	neurotransmitter transport	-0.317292	-1.39845	0.0404825	SYN1/PPP1R9A/PIP5K1C/SYT1/MEF2C/BRSK1/TH/PRRT2/GLUL/RAB3A/SV2A/STX2/SLC18A2/ERC2/RIMS2/GAD2/SV2B/TSPOAP1/SLC29A1/P2RX1/NRXN2/GDNF/RIMS3/SLC25A12/RAP1A/SLC6A16/RPH3A/SYT11/LRRK2/TRIM9/HTR1A/HTR1B/SLC1A7/ADCYAP1/PRKCB/SYT9/SLC6A2/MAOB/RIMS1/P2RY1/SNCA/GPER1/SLC1A6/SLC6A19/SEPTIN5/SLC6A17/SLC17A8/SYN2/CHRNA4/RIMS4/CHRNB4/SLC17A7/PPFIA4/CHAT/RGS2/STXBP5L/NCS1/PRKN/ADRA1A/CNR1/CACNA1B/SLC6A1/SV2C/RGS4…
CC	GO:0150034	distal axon	-0.317777	-1.40688	0.0236943	BRSK1/NDRG2/MAPK8IP1/TH/PRRT2/GLUL/MYO9A/RAB3A/SLC18A2/ERC2/CBX6/TSPOAP1/ROR1/KCNIP3/KCNA3/NTRK2/TENM2/MAP2/EPHA4/CHRM3/PNOC/SYT11/NPTXR/OLFM1/SLC4A10/LRRK2/TIAM1/KCNC1/REG1A/FGF13/FEZ1/PTBP2/HTR1B/TMOD2/ADCYAP1/BOC/PRKCB/ILK/DPYSL3/SNCA/TSHZ3/APBB1/GPER1/SLC17A8/GAP43/CRHBP/NPTX2/KIF5C/NCS1/CDH8/CNR1/CASR/PALLD/MAPT/MAP1B/KCNA2/NOS1/PTPRN/LRRTM1/GRIK5/KCNC2/PDYN/CPLX3/CRTAC1/SLC18A3/GRIK2/STMN2/…
BP	GO:0050769	positive regulation of neurogenesis	-0.318	-1.47315	0.00951053	PPP1R9A/SYT1/VWC2L/NTRK1/SEMA6A/MEF2C/IL6ST/CRX/OBSL1/ZEB2/BAIAP2/PTPRZ1/BRINP1/DLG4/PAK3/MAG/NFE2L2/RIMS2/BCL6/CAMK1/PTPRD/IL1RAPL1/SEMA3A/NTRK2/NKX2-2/NKX2-5/SRF/MME/PRKD1/TENM3/BCL2/EPHA4/RAP1A/SOCS2/GJC2/GDF6/NDNF/NGF/GRIP1/LPAR1/TIAM1/VLDLR/DLX1/REG1A/FEZ1/BRINP3/PCP4/FGFR1/ATP8A2/SMARCD3/P2RY12/HAP1/ADCYAP1/BMP6/NTRK3/ILK/CAMK2B/RIMS1/IL2/EPHA3/DUOXA1/DPYSL3/ARMCX5-GPRASP2/RND2/CRABP2/APBB1…
BP	GO:0072503	cellular divalent inorganic cation homeostasis	-0.319121	-1.48245	0.00952918	ACKR4/ACKR3/ESR1/P2RX1/CALM1/GPR20/ATP13A4/CCL11/GALR2/SLC39A12/PDE6A/GNA15/GNG3/PTGER2/BCL2/HCRTR1/PDE4D/CDH23/BNIP3/S1PR3/EDN3/PKD1/HTR2B/PRNP/GPR32/IL13/SLC25A27/LPAR1/CXCR1/TRPV6/ITPR1/CCR10/CCL21/MT1X/SLC24A4/HTR1B/ELANE/JPH3/HAP1/CRHR1/ADCYAP1/GPR33/PRKCB/CYSLTR1/GRIN2A/CACNA2D1/BDKRB1/IL2/P2RY1/PKD2/SNCA/TACR1/MT1A/JPH4/GJA1/GPER1/MT1M/CXCL12/CD36/LPAR3/DHRS7C/SLC30A8/CALCB/CRHR1/SLC8A3/GP…
CC	GO:0033267	axon part	-0.319903	-1.45659	0.00951053	GJC2/CHRM3/PNOC/SYT11/NPTXR/DST/OLFM1/SLC4A10/KCNAB1/LRRK2/TIAM1/KCNC1/REG1A/FGF13/FEZ1/PTBP2/HTR1B/UCHL1/TMOD2/HAP1/ADCYAP1/BOC/PRKCB/ILK/DPYSL3/SNCA/EPB41L3/MGARP/TSHZ3/APBB1/GPER1/TMEM108/MAP1A/SLC17A8/GAP43/CRHBP/NPTX2/KIF5C/NCS1/CDH8/CNR1/CASR/PALLD/GRIA1/MAPT/MAP1B/KCNA2/NFASC/NOS1/CNTN2/DLG2/KIF1A/PTPRN/LRRTM1/GRIK5/KCNC2/PDYN/TUBB4A/CPLX3/CRTAC1/KIF5A/ANK2/SLC18A3/CNGA3/GRIK2/STMN2/TRPC5/…
BP	GO:0010721	negative regulation of cell development	-0.320098	-1.43954	0.030764	SEMA6A/ISL2/LGALS1/FSTL4/GPR37L1/BRINP1/MCF2/CLDN18/GPR173/MAG/ERBB4/LTF/ID3/DENND5A/NPR2/SEMA3A/NKX2-2/CCL11/SEMA6C/BMPR1A/MAP2/CNTN4/BCL2/EPHA4/EFNB3/NR2F1/S1PR3/OSTN/NFATC4/ULK2/FBLN1/SOX2/LPAR1/LRRK2/PMP22/SEMA3E/PTPRS/PTHLH/KANK1/DLX1/FGF13/DCC/ID4/ADCYAP1/THRB/PBX1/NTRK3/SEMA3D/DPYSL3/BMERB1/SEMA6D/HOXA2/LMX1A/SPART/POU4F2/NRG3/GLI3/ISL1/ASCL1/TLX3/PRTG/MEIS1/RGS2/ZNF536/FRZB/DAAM2/RGS4/WNT…
BP	GO:0050768	negative regulation of neurogenesis	-0.322466	-1.43011	0.0204617	SEMA6A/ISL2/LGALS1/FSTL4/GPR37L1/BRINP1/MCF2/GPR173/MAG/ERBB4/ID3/DENND5A/SEMA3A/NKX2-2/CCL11/SEMA6C/BMPR1A/MAP2/CNTN4/EPHA4/EFNB3/NR2F1/OSTN/NFATC4/ULK2/SOX2/LPAR1/LRRK2/PMP22/SEMA3E/PTPRS/KANK1/DLX1/FGF13/DCC/ID4/ADCYAP1/THRB/PBX1/NTRK3/SEMA3D/DPYSL3/BMERB1/SEMA6D/HOXA2/LMX1A/SPART/POU4F2/NRG3/GLI3/ISL1/ASCL1/TLX3/PRTG/MEIS1/ZNF536/DAAM2/WNT3A/NTN1/RGMA/DIXDC1/CNTN2/SLIT2/PTN/SOX3/NLGN1/IL6/NKX…
MF	GO:0003779	actin binding	-0.32312	-1.48701	0.00951053	WASF3/FHOD3/CAMK2B/ZNF185/SLC6A2/PDLIM7/NCALD/SYNE1/SNCA/PDLIM4/EPB41L3/MYRIP/SNTG2/PPP1R42/MYOZ1/CORO2B/GSN/MAP1A/DSTN/WASF1/TNNT3/MYOM2/PRKN/XIRP2/DAAM2/PALLD/LMOD3/PKNOX2/FAM107A/AIF1L/MAPT/MAP1B/MYL3/KLHL4/FLNA/TNS1/DIXDC1/LRRC10/SVIL/FERMT2/TAGLN/SMTN/CORO6/DMD/CACNB2/TPM1/TMOD1/CALD1/ADCY8/PDLIM3/CAP2/SLC6A4/SORBS1/TPM2/CFL2/KCNMA1/NEXN/FMN2/SYNPO2L/MYLK/KLHL1/MYOM1/LMOD1/MYOT/FLNC/MYOZ2/TR…
BP	GO:0060537	muscle tissue development	-0.324781	-1.47788	0.00951053	FGFR1/MEGF10/MSTN/WNT10B/PITX1/ATF3/FHOD3/MYL6/GATA5/SOX17/PKD2/KLHL40/MYOZ1/GJA1/S100B/BMP5/ACTA1/VGLL2/ISL1/SORBS2/TGFBR3/SGCZ/MYOM2/CAV1/SLC8A1/MEIS1/EGR1/NDRG4/RGS2/DCN/ITGA8/SGCD/ADRA1A/XIRP2/RYR2/SOX15/RBM24/LMOD3/RGS4/WNT3A/CDON/ZFPM2/COL19A1/MYL3/GJC1/TBX5/LRRC10/SVIL/DNER/CSRP1/CASQ1/BTG2/ASB2/TBX20/TPM1/FGF2/P2RX2/JPH2/MYOCD/BVES/CFL2/PI16/FOXP2/AKAP6/KLHL41/AGTR2/MYLK/MYOM1/MYOZ2/POPDC…
BP	GO:0007517	muscle organ development	-0.325391	-1.48285	0.00951053	FGFR1/POU6F1/MEGF10/MSTN/WNT10B/EVC/PITX1/ATF3/MYL6/EGR3/USP2/ADARB1/CTF1/SOX17/KLHL40/MYOZ1/MYMX/GJA1/MKX/S100B/ACTA1/VGLL2/SGCE/ISL1/TGFBR3/MYOM2/CAV1/MEIS1/EGR1/RGS2/DCN/SGCD/XIRP2/RYR2/SOX15/ITGA7/RBM24/LMOD3/RGS4/WNT3A/CDON/ZFPM2/COL19A1/MYL3/TBX5/SVIL/DNER/CASQ1/BTG2/ASB2/TBX20/TAGLN/SMTN/ITGB1BP2/CACNA1H/DMD/CRYAB/TPM1/FGF2/P2RX2/JPH2/MYOCD/SGCA/BVES/CFL2/PI16/SPEG/FOXP2/AKAP6/NEUROG1/KLHL…
BP	GO:0045665	negative regulation of neuron differentiation	-0.326212	-1.40743	0.0421981	SEMA6A/ISL2/LGALS1/FSTL4/GPR37L1/MCF2/MAG/ID3/DENND5A/SEMA3A/NKX2-2/SEMA6C/MAP2/CNTN4/EPHA4/EFNB3/NR2F1/OSTN/NFATC4/ULK2/SOX2/LPAR1/LRRK2/PMP22/SEMA3E/PTPRS/KANK1/DLX1/FGF13/DCC/ID4/THRB/PBX1/SEMA3D/DPYSL3/SEMA6D/HOXA2/LMX1A/SPART/POU4F2/GLI3/ISL1/ASCL1/TLX3/MEIS1/ZNF536/WNT3A/NTN1/RGMA/DIXDC1/CNTN2/SLIT2/SOX3/NLGN1/SLC6A4/DAB1/RIT2/STMN2/TRPC5/MT3/ZNF365/EPHA7/PHOX2B
BP	GO:0010038	response to metal ion	-0.326473	-1.47986	0.0143352	OTC/CYP1A1/JUNB/RASGRP2/SLC25A12/BCL2/CA2/BNIP3/NFATC4/SOD3/SYT6/SCN5A/SYT11/PRNP/SLC34A1/PKLR/LRRK2/JUN/FOS/TRPV6/KCNC1/CACNG2/CLIC4/KHK/GPLD1/MT1X/GLRA2/FIBIN/TXNIP/BMP6/CYBRD1/SYT9/MAOB/KCNIP2/DUSP1/PKD2/SNCA/MT1A/APBB1/CYP11B2/CPNE6/MT1M/APOBEC1/GSN/SNCB/ACTA1/SLC30A8/ASCL1/ITPKB/CRHBP/CAV1/PRKAA2/TFF1/CYP1A2/PRKN/RYR2/TRPC1/CASR/KIT/SLC6A1/KCNK3/MAPT/S100A8/TSHB/FOSB/DLG2/IL1A/FABP4/MT4/CACN…
BP	GO:0014706	striated muscle tissue development	-0.327918	-1.48642	0.0143352	FGFR1/MEGF10/MSTN/WNT10B/PITX1/ATF3/FHOD3/MYL6/GATA5/SOX17/KLHL40/MYOZ1/GJA1/S100B/BMP5/ACTA1/VGLL2/ISL1/SORBS2/TGFBR3/SGCZ/MYOM2/CAV1/SLC8A1/MEIS1/EGR1/NDRG4/RGS2/DCN/SGCD/ADRA1A/XIRP2/RYR2/SOX15/RBM24/LMOD3/RGS4/WNT3A/CDON/ZFPM2/COL19A1/MYL3/GJC1/TBX5/LRRC10/SVIL/DNER/CASQ1/BTG2/ASB2/TBX20/TPM1/FGF2/P2RX2/JPH2/MYOCD/BVES/CFL2/PI16/FOXP2/AKAP6/KLHL41/AGTR2/MYOM1/MYOZ2/POPDC2/HLF/ACTN2/PGM5/PLN/M…
BP	GO:0009410	response to xenobiotic stimulus	-0.328452	-1.45611	0.0204617	PCK2/UGT2B28/SLC18A2/RYR1/ND6/CYP2C18/HOMER2/ERRFI1/GSTM1/CYP1A1/CYP2U1/ADGRL3/CYP2F1/HTR3A/CES1/CYP46A1/CYP2C9/AKR7A3/RGS9/NR3C1/CYP1B1/UGT2B15/CBR3/CYP2A13/TIAM1/PCK1/MSTN/HTR1B/FIBIN/CRHR1/AKR1C1/GRIN2A/ACY3/S100A12/RORA/SNCA/PTGS1/PDE1B/GJB2/CRHR1/PDE2A/GSTA1/CYP3A4/CRHBP/SLC8A1/AADAC/EGR1/RGS2/CDO1/CYP1A2/RYR2/CNR1/GSTM2/SLC6A1/AOC3/FBXO32/RGS4/UGT1A1/PRKAR2B/UGT1A5/SLITRK5/AS3MT/FOSB/GSTM5/…
BP	GO:0007204	positive regulation of cytosolic calcium ion concentration	-0.331504	-1.47945	0.017752	ACKR4/ACKR3/ESR1/CALM1/GPR20/GALR2/GNA15/GNG3/PTGER2/BCL2/PDE4D/S1PR3/PKD1/HTR2B/PRNP/GPR32/IL13/LPAR1/CXCR1/TRPV6/ITPR1/CCR10/CCL21/JPH3/HAP1/CRHR1/ADCYAP1/GPR33/CYSLTR1/GRIN2A/CACNA2D1/BDKRB1/IL2/P2RY1/PKD2/SNCA/TACR1/JPH4/GJA1/GPER1/CD36/LPAR3/DHRS7C/CRHR1/SLC8A3/GPR17/AVPR1A/AVP/CAV1/PTGER3/SLC8A1/ADRA1A/RIC3/RYR2/CNR1/GSTM2/TRPC1/PTH1R/ATP2B4/EDN2/CACNA1C/CXCR2/CALCA/PTGFR/NOS1/CASQ1/ADCY5/D…
BP	GO:0097305	response to alcohol	-0.333269	-1.4418	0.0342429	IL13/GNAI1/FOS/HPGD/SLIT3/CCL21/GPLD1/GLRA2/MSTN/HTR1B/CRHR1/ADCYAP1/UNC79/NTRK3/CYP7A1/GRIN2A/MAOB/IL2/CSF3/APOBEC1/GSN/CRHR1/TGFBR3/AVPR1A/CRHBP/AVP/RGS2/PRKAA2/CDO1/KLF9/CNR1/RGS4/UGT1A1/S100A8/PTGFR/FOSB/SLIT2/ADCY5/NPPC/ADCY2/KCNC2/DEFB104B/ADCY8/SFRP1/KCNMB1/ADIPOQ/DYNAP/SLC2A4/LEP/ADCYAP1R1/ADH7/DEFB104A/PENK/NPAS4/NEFL
BP	GO:0010001	glial cell differentiation	-0.334541	-1.4364	0.030764	NTRK2/OLIG1/NKX2-2/TAL1/EPHA4/BNIP3/SOX2/LAMA2/LPAR1/DLX1/ID4/WASF3/NTRK3/ILK/FGF5/S100B/GSN/CDH2/POU3F1/GLI3/SLC8A3/GPR17/ASCL1/GAP43/PRDM8/RNF112/ROR2/DAAM2/LGI4/MAPT/FGF10/S100A8/TSPAN2/DNER/CNTN2/PTN/TRPC4/ASPA/KLF15/IL6/NKX6-2/RELN/NKX6-1/DAB1/MT3/PLP1/ZNF365/MYOC/PHOX2B
BP	GO:0090276	regulation of peptide hormone secretion	-0.336687	-1.44265	0.030764	TIAM1/ITPR1/GPLD1/SCT/ADCYAP1/G6PC2/SYT9/CLTRN/MYRIP/GPR27/GJA1/GPER1/GCK/SLC30A8/INS/ISL1/FFAR1/CRHBP/SLC25A4/STXBP5L/CHGA/ABCC8/PRKN/CNR1/CASR/GRP/CACNA1C/MTNR1B/ADCY5/KCNC2/ADCY8/SFRP1/SLC2A2/NEUROD1/NKX6-1/GHSR/KCNA5/EPHA5/LEP/NNAT/KCNB1/GCG/GHRL/CARTPT/TFAP2B/GIP
BP	GO:0048588	developmental cell growth	-0.337585	-1.45544	0.0311252	VCL/OSTN/ULK2/NGF/OLFM1/TIAM1/SEMA3E/PTPRS/REG1A/FGF13/SLIT3/DCC/NTRK3/SEMA3D/ILK/RIMS1/RND2/NDN/CRABP2/SEMA6D/NRP2/CPNE6/CXCL12/LPAR3/TMEM108/SPART/POU4F2/WASF1/SORBS2/RGS2/PRKN/ADRA1A/RGS4/WNT3A/MAPT/MAP1B/NTN1/SLIT2/CACNG7/NKX6-1/FLRT1/PI16/AKAP6/AGTR2/TRPC5/MT3/SYT4/SH3GL2/EPHA7
BP	GO:0051048	negative regulation of secretion	-0.339311	-1.46439	0.0311989	TRIM9/HTR1B/SCT/P2RY12/CRHR1/IL33/MAOB/P2RY1/SNCA/CARD18/WNK3/CRHR1/INS/CRHBP/PTGER3/STXBP5L/CHGA/ANGPT1/PRKN/CNR1/ANXA1/NPY5R/SSC5D/TFF2/FOXF1/CYP4F2/MTNR1B/SFRP1/GHSR/ADIPOQ/APOA1/NEUROG1/AGTR2/TACR2/LEP/CIDEA/IL36RN/KCNB1/GHRL/SPX/SYT4/CARTPT/NPY2R
BP	GO:0099504	synaptic vesicle cycle	-0.339379	-1.43532	0.040788	PLD1/SYN1/PIP5K1C/SYT1/NLGN2/BRSK1/TH/PRRT2/NLGN4X/RAB3A/SV2A/STX2/SLC18A2/ERC2/RIMS2/P2RX1/RIMS3/RAP1A/SYT11/LRRK2/TRIM9/HTR1B/AMPH/PRKCB/NLGN4Y/SYT9/RIMS1/P2RY1/SNCA/SNCB/CDH2/SEPTIN5/SLC17A8/SYN2/CHRNA4/RIMS4/SLC17A7/STXBP5L/NCS1/ADRA1A/CNR1/WNT3A/MAGI2/SNAP91/FGF14/CACNB2/NLGN1/GRIK5/CPLX3/SLC2A4/CAMK2A/UNC13C/SYT4/CHRM2/NRXN1/SH3GL2
BP	GO:0009914	hormone transport	-0.339602	-1.52259	0.00951053	TIAM1/POMC/ITPR1/HTR1A/GPLD1/FGFR1/SCT/SELENOM/CRHR1/ADCYAP1/BMP6/G6PC2/LTBP4/SYT9/CPE/CLTRN/SCG5/P2RY1/MYRIP/GPR27/GJA1/HCAR2/GPER1/GCK/SLC30A8/CRHR1/INS/ISL1/FFAR1/CRHBP/SLC25A4/STXBP5L/CHGA/ABCC8/PRKN/CNR1/ANXA1/CASR/GRP/CACNA1C/IL1RN/MTNR1B/ADCY5/MC4R/PTPRN/CHRNA3/KCNC2/IL6/ADCY8/SFRP1/SLC2A2/NEUROD1/CPLX3/NKX6-1/GHSR/AGTR1/ADIPOQ/KCNA5/EPHA5/GPR119/AGTR2/TACR2/LEP/NNAT/GALR1/KCNB1/GCG/GHRL/C…
BP	GO:0006814	sodium ion transport	-0.342037	-1.47248	0.0255654	SCN4B/SLC5A1/NKX2-5/STOM/ASIC2/SLC13A2/CATSPER4/SCN5A/SLC34A1/SLC4A10/SLC5A11/ATP1A3/HCN2/FGF13/SLC24A4/SCN9A/SLMAP/SLC9A9/PKD2/SCN11A/SLC10A6/SLC23A1/PER1/WNK3/SLC17A8/SLC8A3/ADRB2/FXYD4/SLC17A7/SLC5A4/SLC8A1/HCN1/SCNN1B/SCN2B/ATP2B4/SCNN1G/SLC5A5/ASIC5/NOS1/ATP1B2/SLC9A4/FXYD1/SLC10A4/DMD/FXYD6/CNTN1/SLC8A2/SLC24A5/SLC6A15/SLC12A1/ATP1A2/SCN7A/SLC5A7/ATP4A/ATP4B
BP	GO:0099003	vesicle-mediated transport in synapse	-0.342105	-1.46391	0.0278771	PINK1/SYN1/PIP5K1C/SYT1/NLGN2/PRRT2/NLGN4X/RAB3A/SV2A/STX2/ERC2/RIMS2/P2RX1/RIMS3/MAP2/RAP1A/SYT6/SYT11/GRIP1/LRRK2/TRIM9/HTR1B/AMPH/PRKCB/NLGN4Y/NSG1/SYT9/RIMS1/P2RY1/SNCA/SNCB/SEPTIN5/CHRNA4/RIMS4/SLC17A7/KIF5C/STXBP5L/NCS1/PRKN/ADRA1A/CNR1/SNAP91/GSG1L/CACNB2/NLGN1/GRIK5/CPLX3/KIF5A/SLC2A4/CALY/CAMK2A/UNC13C/SYT4/CHRM2/SH3GL2/ARC
BP	GO:0023061	signal release	-0.343407	-1.58911	0.00952381	EDN3/SYT6/RPH3A/SYT11/CAMK2G/RFX6/LRRK2/TIAM1/POMC/ITPR1/TRIM9/HTR1A/GPLD1/FGFR1/HTR1B/SCT/SELENOM/CRHR1/ADCYAP1/BMP6/PRKCB/G6PC2/LTBP4/SYT9/RIMS1/CPE/CLTRN/SCG5/P2RY1/SNCA/MYRIP/GPR27/GJA1/HCAR2/GPER1/GCK/SLC30A8/CRHR1/SEPTIN5/INS/ISL1/SYN2/CHRNA4/RIMS4/FFAR1/CHRNB4/PPFIA4/CRHBP/CHAT/SLC25A4/STXBP5L/NCS1/CHGA/ABCC8/PRKN/ADRA1A/CNR1/CACNA1B/ANXA1/CASR/GRP/CACNA1C/IL1RN/MTNR1B/ADCY5/MC4R/PTPRN/CAC…
BP	GO:0007626	locomotory behavior	-0.347933	-1.47726	0.0277123	GDNF/HOXB8/CIART/TAL1/ADGRL3/EPHA4/EFNB3/CDH23/GPR88/SLC4A10/LRRK2/QRFP/CHL1/HPGDS/UCHL1/CRHR1/USP2/PBX3/SNCA/CEND1/LMX1A/CXCL12/PDE1B/CRHR1/CHRNA4/CHRNB4/GPR52/SOBP/RASD2/AVP/MEIS1/EGR1/PRKN/CACNA1B/GLRB/ASTN1/LGI4/NOVA1/ALK/SEZ6L/C1QL1/CSTB/CNTN2/ADCY5/GNAO1/LRRTM1/CHRNA3/TMOD1/ADCY8/GHSR/DAB1/PAK5/NEGR1/KLHL1/ATP1A2/PENK/SLURP1/NPY2R/GIP
BP	GO:0050807	regulation of synapse organization	-0.349065	-1.50274	0.0225369	PPP1R9A/NLGN2/NTRK1/MEF2C/ABL1/BAIAP2/PAK3/MDGA1/CAMK1/PTPRD/IL10/IL1RAPL1/NTRK2/ADGRB1/ASIC2/ADGRL3/EPHA4/NFATC4/CLSTN2/LINGO2/PRNP/LRRN3/LRTM2/LRRK2/TIAM1/PTPRS/NTRK3/CAMK2B/CTTNBP2/ARMCX5-GPRASP2/SNCA/NRP2/SHISA6/SLITRK1/CDH2/INS/TUBA1A/LRFN5/GAP43/CDH8/WNT3A/SLITRK4/SLITRK5/CUX2/NTN1/PTN/LRFN2/LRRTM1/NLGN1/SLITRK2/RELN/GHSR/FLRT1/LRRTM3/ADGRB3/GRID2/FRMPD4/GPM6A/DGKB/GHRL/SLITRK3/NRXN1/EPHA7/…
BP	GO:0050803	regulation of synapse structure or activity	-0.34924	-1.50988	0.0195287	CAMK1/PTPRD/IL10/IL1RAPL1/NTRK2/ADGRB1/ASIC2/ADGRL3/EPHA4/NFATC4/CLSTN2/LINGO2/PRNP/LRRN3/LRTM2/LRRK2/TIAM1/PTPRS/NTRK3/CAMK2B/CTTNBP2/ARMCX5-GPRASP2/SNCA/NRP2/SHISA6/SLITRK1/CDH2/INS/SLC17A8/TUBA1A/LRFN5/SLC17A7/GAP43/CDH8/WNT3A/SLITRK4/SLITRK5/CUX2/NTN1/PTN/LRFN2/LRRTM1/NLGN1/SLITRK2/RELN/GHSR/FLRT1/LRRTM3/ADGRB3/GRID2/FRMPD4/GPM6A/DGKB/GHRL/SLITRK3/NRXN1/EPHA7/ARC
BP	GO:0010959	regulation of metal ion transport	-0.349326	-1.58729	0.00951053	EDN3/GJC2/LRRC55/KCNE4/SCN5A/PRNP/CAMK2G/RGS9/IL13/KCNAB1/KCNC1/AHNAK/CCL2/P2RY12/JPH3/TMC1/HAP1/CRHR1/ADCYAP1/CACNA2D1/SLMAP/CAMK2B/KCNIP2/BDKRB1/RRAD/PKD2/SNCA/JPH4/GJA1/GPER1/CXCL12/GCK/LPAR3/DHRS7C/GEM/PER1/WNK3/CRHR1/EHD3/ADRB2/KCNIP4/FXYD4/FFAR1/CAV1/SLN/SLC8A1/STAC/RYR2/KCNH2/GSTM2/TRPC1/CACNA1B/SCN2B/CASR/ATP2B4/CACNA1C/RGS4/KCNN2/LRRC38/FGF14/FLNA/MTNR1B/NOS1/ATP1B2/CASQ1/FXYD1/HSPA2/GNA…
BP	GO:0051480	regulation of cytosolic calcium ion concentration	-0.350032	-1.58272	0.00951053	TSPOAP1/LPAR4/ACKR4/ACKR3/ESR1/P2RX1/CALM1/GPR20/GALR2/PDE6A/GNA15/GNG3/PTGER2/BCL2/HCRTR1/PDE4D/CDH23/S1PR3/PKD1/HTR2B/PRNP/GPR32/IL13/LPAR1/CXCR1/TRPV6/ITPR1/CCR10/CCL21/HTR1B/JPH3/HAP1/CRHR1/ADCYAP1/GPR33/CYSLTR1/GRIN2A/CACNA2D1/BDKRB1/IL2/P2RY1/PKD2/SNCA/TACR1/JPH4/GJA1/GPER1/CD36/LPAR3/DHRS7C/CALCB/CRHR1/SLC8A3/GPR17/SCGN/AVPR1A/AVP/CAV1/PTGER3/SLC8A1/NCS1/ADRA1A/RIC3/RYR2/CNR1/GSTM2/TRPC1/P…
BP	GO:0031032	actomyosin structure organization	-0.354232	-1.49814	0.0251087	WNT4/PPP1R9A/PDGFRA/ARRB1/MYPN/MEF2C/MEF2A/ABL1/OBSL1/EPB41L4A/MYL2/ARHGAP28/ASAP3/PIK3R1/NKX2-5/SRF/ACTC1/ARHGAP6/FRMD6/MYLK3/LPAR1/CSRP2/PHLDB2/TMOD2/CAPN9/FHOD3/DLC1/EPB41L3/MYOZ1/LURAP1/CORO2B/ACTA1/TNNT3/MYOM2/LMOD3/CSRP1/CASQ1/TMEFF2/TPM1/TMOD1/SFRP1/SORBS1/CFL2/APOA1/KLHL41/SYNPO2L/MYOM1/LMOD1/MYOZ2/CNN1/ACTN2/PGM5/CASQ2/MYH11/TAC1/LDB3/MYOC
BP	GO:0030509	BMP signaling pathway	-0.355856	-1.46518	0.0443068	ZCCHC12/GDF6/USP9Y/DSG4/DLX5/TMPRSS6/AMHR2/ZNF423/DLX1/BMP6/GREM2/ILK/SFRP5/BMPR1B/BMP5/SPART/TGFBR3/RGMB/SMAD9/EGR1/GDF7/ROR2/RYR2/SOSTDC1/RNF165/RGMA/DAND5/CHRDL1/SFRP1/BMPER/TMEM100/CFC1/RBPMS2/VWC2/TFAP2B
BP	GO:0046879	hormone secretion	-0.356698	-1.59189	0.00951053	TIAM1/POMC/ITPR1/HTR1A/GPLD1/FGFR1/SCT/SELENOM/CRHR1/ADCYAP1/BMP6/G6PC2/LTBP4/SYT9/CPE/CLTRN/SCG5/P2RY1/MYRIP/GPR27/GJA1/HCAR2/GPER1/GCK/SLC30A8/CRHR1/INS/ISL1/FFAR1/CRHBP/SLC25A4/STXBP5L/CHGA/ABCC8/PRKN/CNR1/ANXA1/CASR/GRP/CACNA1C/IL1RN/MTNR1B/ADCY5/MC4R/PTPRN/CHRNA3/KCNC2/IL6/ADCY8/SFRP1/SLC2A2/NEUROD1/CPLX3/NKX6-1/GHSR/AGTR1/ADIPOQ/KCNA5/EPHA5/GPR119/AGTR2/TACR2/LEP/NNAT/GALR1/KCNB1/GCG/GHRL/C…
BP	GO:0010976	positive regulation of neuron projection development	-0.358633	-1.58185	0.00951053	PPP1R9A/SYT1/NTRK1/OBSL1/ZEB2/BAIAP2/DLG4/PAK3/NFE2L2/RIMS2/CAMK1/PTPRD/IL1RAPL1/NTRK2/SRF/PRKD1/TENM3/EPHA4/RAP1A/NDNF/NGF/GRIP1/LPAR1/TIAM1/VLDLR/REG1A/FEZ1/FGFR1/ATP8A2/ADCYAP1/NTRK3/ILK/CAMK2B/RIMS1/IL2/EPHA3/DPYSL3/ARMCX5-GPRASP2/RND2/CRABP2/APBB1/CPNE6/CXCL12/BMP5/LPAR3/RET/SLITRK1/POU4F2/ALKAL2/NDRG4/RGS2/PRKN/CNR1/S100A9/WNT3A/MAGI2/MAPT/MAP1B/CUX2/NTN1/ALK/SLIT2/PTN/MAP6/CACNG7/NLGN1/REL…
BP	GO:0071772	response to BMP	-0.359816	-1.49485	0.0216792	USP9Y/DSG4/DLX5/TMPRSS6/AMHR2/ZNF423/DLX1/BMP6/GREM2/ILK/SFRP5/BMPR1B/GATA5/BMP5/SPART/TGFBR3/RGMB/SMAD9/EGR1/TNMD/GDF7/ROR2/RYR2/SOSTDC1/RNF165/RGMA/DAND5/CHRDL1/SFRP1/BMPER/TMEM100/CFC1/VSTM2A/RBPMS2/VWC2/PHOX2B/TFAP2B
BP	GO:0071773	cellular response to BMP stimulus	-0.359816	-1.49485	0.0216792	USP9Y/DSG4/DLX5/TMPRSS6/AMHR2/ZNF423/DLX1/BMP6/GREM2/ILK/SFRP5/BMPR1B/GATA5/BMP5/SPART/TGFBR3/RGMB/SMAD9/EGR1/TNMD/GDF7/ROR2/RYR2/SOSTDC1/RNF165/RGMA/DAND5/CHRDL1/SFRP1/BMPER/TMEM100/CFC1/VSTM2A/RBPMS2/VWC2/PHOX2B/TFAP2B
BP	GO:0030072	peptide hormone secretion	-0.359954	-1.57633	0.00951053	TIAM1/ITPR1/GPLD1/SCT/CRHR1/ADCYAP1/G6PC2/LTBP4/SYT9/CPE/CLTRN/MYRIP/GPR27/GJA1/GPER1/GCK/SLC30A8/CRHR1/INS/ISL1/FFAR1/CRHBP/SLC25A4/STXBP5L/CHGA/ABCC8/PRKN/CNR1/ANXA1/CASR/GRP/CACNA1C/IL1RN/MTNR1B/ADCY5/MC4R/PTPRN/KCNC2/IL6/ADCY8/SFRP1/SLC2A2/NEUROD1/CPLX3/NKX6-1/GHSR/KCNA5/EPHA5/GPR119/TACR2/LEP/NNAT/KCNB1/GCG/GHRL/VIP/CARTPT/TFAP2B/GIP
BP	GO:0045666	positive regulation of neuron differentiation	-0.360038	-1.631	0.00951053	PPP1R9A/SYT1/VWC2L/NTRK1/MEF2C/CRX/OBSL1/ZEB2/BAIAP2/BRINP1/DLG4/PAK3/NFE2L2/RIMS2/BCL6/CAMK1/PTPRD/IL1RAPL1/NTRK2/NKX2-2/NKX2-5/SRF/PRKD1/TENM3/BCL2/EPHA4/RAP1A/SOCS2/GDF6/NDNF/NGF/GRIP1/LPAR1/TIAM1/VLDLR/DLX1/REG1A/FEZ1/BRINP3/PCP4/FGFR1/ATP8A2/ADCYAP1/BMP6/NTRK3/ILK/CAMK2B/RIMS1/IL2/EPHA3/DUOXA1/DPYSL3/ARMCX5-GPRASP2/RND2/CRABP2/APBB1/CPNE6/CXCL12/BMP5/LPAR3/RET/SLITRK1/POU4F2/ALKAL2/ASCL1/NDR…
BP	GO:0062013	positive regulation of small molecule metabolic process	-0.360898	-1.47428	0.0480048	GPLD1/KAT2B/BMP6/FABP1/CYP7A1/PLIN5/P2RY1/SNCA/GPER1/GCK/PID1/INS/PPP1R3G/AVPR1A/AVP/PRKAA2/ANXA1/PTH1R/C1QTNF2/NOS1/LHCGR/NR4A3/GUCA2B/GHSR/SORBS1/ADIPOQ/ESRRB/APOA4/ADCYAP1R1/GCG/GUCA1C
BP	GO:0019932	second-messenger-mediated signaling	-0.361298	-1.66558	0.00951053	GNG2/HOMER2/ACKR4/ACKR3/CALM1/NPR2/NDUFS4/ADGRB1/GALR2/HDAC4/PTGER2/RAMP1/ADGRL3/ADGRG2/INPP5A/PDE4D/NFATC4/EDN3/HTR2B/PRNP/PDE9A/NDNF/ADRA1D/LPAR1/LRRK2/GNAI1/CXCR1/OR51E2/PTHLH/ITPR1/C10orf71/BHLHA15/CCR10/GUCY1A1/SELE/ADGRD1/NMUR1/SCT/P2RY12/JPH3/MRAP/HAP1/CRHR1/ADCYAP1/GNAL/GRIN2A/GUCY1B1/NCALD/PKD2/PTGDR2/MYOZ1/GPHB5/JPH4/GPER1/MC5R/CD36/NPR1/CALCB/CRHR1/INS/GPR62/ADRB2/PRKG1/PDE2A/RASD2/AVP…
BP	GO:0034765	regulation of ion transmembrane transport	-0.362506	-1.68042	0.00951053	STOM/ASIC2/CLIC6/PDE4D/HTR3A/KCNJ12/CATSPER4/EDN3/GJC2/LRRC55/KCNE4/SCN5A/KCND3/PRNP/RGS9/IL13/SLC34A1/KCNAB1/KCNC1/HCN2/AHNAK/GRIA3/CACNG2/CLIC4/CCL2/JPH3/TMC1/HAP1/CRHR1/SCN9A/KCNJ1/GRIN2A/CACNA2D1/SLMAP/KCNIP2/BDKRB1/CALHM1/RRAD/KCNQ4/PKD2/SNCA/CLCNKB/SCN11A/JPH4/GJA1/SHISA6/KCNK16/GPER1/DHRS7C/GEM/KCNB2/KCNH5/WNK3/CRHR1/EHD3/ADRB2/KCNIP4/FXYD4/KCNA4/PM20D1/KCNK7/CRHBP/CAV1/SLN/SLC8A1/CLIC3/RG…
BP	GO:0046883	regulation of hormone secretion	-0.362989	-1.59875	0.00951053	TIAM1/POMC/ITPR1/HTR1A/GPLD1/FGFR1/SCT/CRHR1/ADCYAP1/BMP6/G6PC2/SYT9/CLTRN/SCG5/P2RY1/MYRIP/GPR27/GJA1/HCAR2/GPER1/GCK/SLC30A8/CRHR1/INS/ISL1/FFAR1/CRHBP/SLC25A4/STXBP5L/CHGA/ABCC8/PRKN/CNR1/ANXA1/CASR/GRP/CACNA1C/MTNR1B/ADCY5/CHRNA3/KCNC2/ADCY8/SFRP1/SLC2A2/NEUROD1/NKX6-1/GHSR/AGTR1/ADIPOQ/KCNA5/EPHA5/AGTR2/TACR2/LEP/NNAT/GALR1/KCNB1/GCG/GHRL/CCKAR/TAC1/VIP/CARTPT/TFAP2B/GIP
BP	GO:0007269	neurotransmitter secretion	-0.364943	-1.5209	0.0216792	SYN1/PPP1R9A/PIP5K1C/SYT1/MEF2C/BRSK1/PRRT2/RAB3A/SV2A/STX2/SLC18A2/ERC2/RIMS2/GAD2/TSPOAP1/P2RX1/NRXN2/RIMS3/RAP1A/RPH3A/SYT11/LRRK2/TRIM9/HTR1B/PRKCB/SYT9/RIMS1/P2RY1/SNCA/GPER1/SEPTIN5/SYN2/CHRNA4/RIMS4/CHRNB4/PPFIA4/CHAT/STXBP5L/NCS1/PRKN/ADRA1A/CNR1/CACNA1B/CACNB2/NLGN1/GRIK5/CHRNA3/CPLX3/SLC18A3/SLC22A2/TACR2/CAMK2A/UNC13C/SYT4/CHRM2/NRXN1/SLC5A7
MF	GO:0005516	calmodulin binding	-0.365352	-1.55766	0.0193084	SCN5A/CAMK2G/MYH2/TRPV6/PCP4/PDE1A/CAMK2B/RRAD/KCNQ4/GEM/PDE1B/KCNH5/SLC8A3/ITPKB/GAP43/SLC8A1/KCNN3/RGS2/PDE1C/KCNQ5/RYR2/ATP2B4/CACNA1C/RGS4/KCNN2/NOS1/CFAP221/SRY/MAP6/CALD1/ADCY8/SLC8A2/RIT2/MYLK/RYR3/CAMK2A/ATP2B3/CNN1/UNC13C/ATP2B2/MYH11/ARPP21/PNCK
BP	GO:0007416	synapse assembly	-0.365525	-1.53425	0.0275502	ERBB4/MDGA1/PTPRD/GABRG2/NRXN2/IL1RAPL1/NTRK2/ADGRB1/ASIC2/ADGRL3/ADD2/GABRB2/CLSTN2/LINGO2/LRRN3/LRTM2/PCDHB4/PCDHB5/PTPRS/NTRK3/NLGN4Y/ARMCX5-GPRASP2/SNCA/SLITRK1/KIRREL3/CDH2/LRFN5/GAP43/LRRC4/WNT3A/MAGI2/SLITRK4/MAP1B/SLITRK5/CUX2/NTN1/DNER/LRRTM1/NLGN1/SLITRK2/GHSR/FLRT1/LRRTM3/ADGRB3/GRID2/GPM6A/GHRL/SLITRK3/NPAS4/NRXN1/GABRA1/EPHA7
BP	GO:0050808	synapse organization	-0.365676	-1.67352	0.00951053	BAIAP2/CAST/LAMB2/NLGN4X/DLG4/RAB3A/PAK3/CACNB4/ERBB4/RAB39B/MDGA1/ERC2/CAMK1/PTPRD/IL10/PALM/TNC/GABRG2/NRXN2/IL1RAPL1/NTRK2/ADGRB1/GDNF/ASIC2/ADGRL3/EPHA4/ACTN1/ADD2/GABRB2/PCDHGC3/NFATC4/CLSTN2/LINGO2/PRNP/LRRN3/NEFH/LRTM2/NFIA/PCDHB4/LRRK2/PCDHB5/TIAM1/SEMA3E/PTPRS/IGSF9B/CACNG2/WASF3/NTRK3/NLGN4Y/DRP2/CAMK2B/CTTNBP2/ARMCX5-GPRASP2/LRRC4C/SNCA/LMX1A/NRP2/SHISA6/SNCB/SLITRK1/TMEM108/KIRREL3/CD…
BP	GO:0051592	response to calcium ion	-0.366542	-1.50268	0.0268905	SYT1/CPNE4/MEF2C/MEF2A/SYT15/SLC25A23/RYR1/AQP3/CALM1/KCNH1/JUNB/RASGRP2/SLC25A12/SYT6/SCN5A/SYT11/JUN/FOS/TRPV6/CACNG2/CLIC4/GPLD1/TXNIP/SYT9/KCNIP2/DUSP1/PKD2/CPNE6/APOBEC1/ITPKB/CRHBP/CAV1/PRKAA2/RYR2/TRPC1/CASR/SLC6A1/TSHB/FOSB/NLGN1/ADCY8/KCNMB2/KCNMB1/KCNMA1/RYR3/SYT10/CASQ2/PENK/SYT4/ACER1
BP	GO:0099643	signal release from synapse	-0.3676	-1.53426	0.0189672	SYN1/PPP1R9A/PIP5K1C/SYT1/MEF2C/BRSK1/PRRT2/RAB3A/SV2A/STX2/SLC18A2/ERC2/RIMS2/GAD2/TSPOAP1/P2RX1/NRXN2/RIMS3/RAP1A/SYT6/RPH3A/SYT11/LRRK2/TRIM9/HTR1B/PRKCB/SYT9/RIMS1/P2RY1/SNCA/GPER1/SEPTIN5/SYN2/CHRNA4/RIMS4/CHRNB4/PPFIA4/CHAT/STXBP5L/NCS1/PRKN/ADRA1A/CNR1/CACNA1B/CACNB2/NLGN1/GRIK5/CHRNA3/CPLX3/SLC18A3/SLC22A2/TACR2/CAMK2A/UNC13C/SYT4/CHRM2/NRXN1/SLC5A7
MF	GO:0022803	passive transmembrane transporter activity	-0.367743	-1.70015	0.00951053	ASIC2/BCL2/CLIC6/HTR3A/KCNJ12/GABRB2/CATSPER4/GJC2/LRRC55/KCNE4/PKD1/SCN5A/KCND3/CLCA4/KCNAB1/TRPV6/KCNC1/ITPR1/HCN2/AQP12A/GRIA3/CLCA2/CACNG2/CLIC4/SLC24A4/GLRA2/HTR1B/JPH3/TMC1/SCN9A/GRID1/GLRA4/HTR3B/KCNJ1/GRIN2A/CACNA2D1/KCNIP2/CALHM1/TRPM3/KCNQ4/PKD2/CLCNKB/SCN11A/JPH4/GJA1/KCNK16/TMC3/GRIK1/KCNB2/KCNH5/GJB2/TMEM63C/KCNT2/CHRNA2/KCNIP4/FXYD4/CHRNA4/KCNA4/CHRNB4/PDE2A/SLC17A7/P2RX6/KCNK7/ABCC…
MF	GO:0015267	channel activity	-0.367904	-1.70063	0.00951053	ASIC2/BCL2/CLIC6/HTR3A/KCNJ12/GABRB2/CATSPER4/GJC2/LRRC55/KCNE4/PKD1/SCN5A/KCND3/CLCA4/KCNAB1/TRPV6/KCNC1/ITPR1/HCN2/AQP12A/GRIA3/CLCA2/CACNG2/CLIC4/SLC24A4/GLRA2/HTR1B/JPH3/TMC1/SCN9A/GRID1/GLRA4/HTR3B/KCNJ1/GRIN2A/CACNA2D1/KCNIP2/CALHM1/TRPM3/KCNQ4/PKD2/CLCNKB/SCN11A/JPH4/GJA1/KCNK16/TMC3/GRIK1/KCNB2/KCNH5/GJB2/TMEM63C/KCNT2/CHRNA2/KCNIP4/FXYD4/CHRNA4/KCNA4/CHRNB4/PDE2A/SLC17A7/P2RX6/KCNK7/ABCC…
BP	GO:0071248	cellular response to metal ion	-0.368373	-1.5546	0.0165388	MT1E/SYT1/CPNE4/MT1G/PTGS2/MEF2C/MEF2A/TH/DLG4/SYT15/SLC25A23/NFE2L2/RYR1/KCNH1/CYP1A1/JUNB/RASGRP2/BNIP3/NFATC4/SYT6/SCN5A/SYT11/PRNP/SLC34A1/LRRK2/JUN/FOS/CLIC4/GPLD1/MT1X/GLRA2/BMP6/SYT9/PKD2/SNCA/MT1A/CYP11B2/CPNE6/MT1M/GSN/ITPKB/CRHBP/PRKAA2/CYP1A2/PRKN/KCNK3/FOSB/DLG2/FABP4/MT4/CACNA1H/NLGN1/ADCY8/RYR3/MT1B/SYT10/MT3/SYT4/ACER1/KCNA1
CC	GO:0098793	presynapse	-0.369006	-1.71613	0.00952918	BRSK1/GRM6/TH/PRRT2/BAIAP2/NLGN4X/ROGDI/GLUL/DLG4/SYNGR1/RAB3A/SV2A/STX2/ERBB4/SLC18A2/ERC2/RIMS2/GAD2/SV2B/TSPOAP1/ROR1/SLC29A1/P2RX1/RGS7BP/NRXN2/KCNIP3/KCNA3/ADAM23/NTRK2/KCNH1/MME/RIMS3/CNTNAP4/EPHA4/EFNB3/HTR3A/CYP46A1/CHRM3/SYT6/RPH3A/PNOC/SYT11/NGF/SLC4A10/LRRK2/PTPRS/KCNC1/TRIM9/HTR1B/SLC1A7/HAP1/ADCYAP1/AMPH/PRKCB/NLGN4Y/GRIN2A/GUCY1B1/GABBR1/ILK/SYT9/SLC6A2/CTTNBP2/RIMS1/P2RY1/SNCA/APBB…
MF	GO:0015085	calcium ion transmembrane transporter activity	-0.371012	-1.50034	0.0368518	TRPV6/ITPR1/CACNG2/SLC24A4/HTR1B/JPH3/TMC1/GRIN2A/CACNA2D1/CALHM1/TRPM3/PKD2/JPH4/SLC8A3/PDE2A/SLC8A1/NCS1/RYR2/CNR1/TRPC1/CACNA1B/ATP2B4/CACNA1C/CACNA2D3/TRPC4/CACNG7/CACNA1H/CACNB2/JPH2/SLC8A2/SLC24A5/TRPC5/RYR3/ATP2B3/GPM6A/ATP2B2
BP	GO:0098742	cell-cell adhesion via plasma-membrane adhesion molecules	-0.372556	-1.64258	0.00951053	FAT2/MYPN/PCDHGA4/PCDHB12/ROBO3/CDHR4/PCDHGA6/CLDN18/MAG/MDGA1/PTPRM/PTPRD/IL10/PCDHA10/CADM1/PCDHB15/IL1RAPL1/TENM2/CRB1/DCHS1/MYADM/CLDN5/PCDH11X/CNTN4/PCDHB1/TENM3/CDH22/ADGRL3/KLF4/CDH23/PCDHGB6/PCDHGC3/PCDHA13/CLSTN2/PKD1/DSC2/PCDHGA3/FAT4/PCDHB4/PCDHB5/DSG4/PCDH7/TRO/PTPRS/IGSF9B/PCDHGA2/SELE/PCDHGB4/PCDHGB7/CDHR3/DCHS2/GATA5/LRRC4C/PCDHGB5/RET/DSG3/SLITRK1/KIRREL3/CDH2/LRFN5/LRRC4/PCDHA3/C…
BP	GO:0051146	striated muscle cell differentiation	-0.372585	-1.64243	0.00951053	ADGRB1/KCNH1/NKX2-5/SRF/SGCB/HDAC4/ACTC1/BCL2/IGFBP5/BARX2/MYLK3/ALPK3/CSRP2/BHLHA15/UCHL1/TMOD2/WNT10B/CAPN9/FHOD3/PLEKHO1/KLHL40/MYOZ1/MYMX/ACTA1/CDH2/PLPP7/TNNT3/SORBS2/MYOM2/AVPR1A/SLC8A1/RGS2/SGCD/ADRA1A/RBM24/LMOD3/RGS4/DMPK/WNT3A/CDON/MYEF2/TBX5/LRRC10/NOS1/DNER/CSRP1/CASQ1/WFIKKN2/CACNA1H/DMD/TPM1/TMOD1/P2RX2/MYOCD/BVES/CFL2/PI16/AKAP6/KLHL41/SYNPO2L/AGTR2/MYOM1/LMOD1/FLNC/MYOZ2/POPDC2/AD…
BP	GO:0008217	regulation of blood pressure	-0.373051	-1.56663	0.0191315	ATP5PF/P2RX1/NAV2/NPR2/MME/ASIC2/PDE4D/CES1/ADAMTS16/EDN3/ACE2/CPA3/CYP4A11/OR51E2/QRFP/POMC/GUCY1A1/UTS2B/RNLS/BDKRB1/NCALD/CYP11B2/CORO2B/GJA1/PTGS1/NPR1/ADRB2/CTSG/AVPR1A/AVP/CHGA/SLC2A5/ADRA1A/CNR1/CACNA1B/EDN2/AR/CYP4F2/ACTA2/NOS1/CMA1/HBB/GUCA2B/TPM1/P2RX2/AGTR1/ADIPOQ/NPR3/AGTR2/ADRB3/LEP/ATP1A2/SPX/NPY/TAC1/CARTPT
BP	GO:0042692	muscle cell differentiation	-0.373842	-1.68905	0.00951053	MEGF10/UCHL1/SMARCD3/TMOD2/WNT10B/BOC/CAPN9/FHOD3/PLEKHO1/RORA/SYNE1/KLHL40/MYOZ1/MYMX/GPER1/ACTA1/CDH2/FBXO40/PLPP7/TNNT3/SORBS2/SGCZ/MYOM2/AVPR1A/SLC8A1/RGS2/ITGA8/SYPL2/SGCD/ADRA1A/ZEB1/KIT/RBM24/LMOD3/RGS4/DMPK/WNT3A/CDON/FOXF1/FGF10/MYEF2/TBX5/LRRC10/NOS1/DNER/CSRP1/CASQ1/WFIKKN2/CACNA1H/DMD/TPM1/TMOD1/P2RX2/ANK2/MYOCD/BVES/CFL2/PI16/SPEG/AKAP6/KLHL41/SYNPO2L/AGTR2/MYOM1/LMOD1/FLNC/MYOZ2/POP…
BP	GO:0043588	skin development	-0.375396	-1.72331	0.00951053	KRTAP22-1/KRTAP13-1/KRTAP9-3/KRTAP4-9/KRTAP12-2/KRTAP25-1/KRTAP9-2/KRTAP13-3/KRTAP10-7/KRT27/LIPN/BCL2/IGFBP5/KRTAP19-4/KRTAP9-8/KRT79/KRT38/GRHL1/PKD1/KRTAP1-4/KRTAP4-11/DSC2/DSP/ALOX12B/KRT16/KRT20/DSG4/FGF7/KRT73/KRTAP1-1/EVPL/CLIC4/LCE1C/ATP8A2/WNT10B/TXNIP/KRTAP10-10/FLG2/TMEM79/LCE6A/LCE1B/GRHL3/HRNR/KRTAP4-4/KRTAP10-6/KRTAP19-8/KRTAP10-5/ZFP36/TP63/DSG3/POU3F1/KRT6A/ALOX15B/SPRR4/SPRR1B/SO…
MF	GO:0001653	peptide receptor activity	-0.375645	-1.53999	0.015876	RXFP1/NPY1R/GPR37L1/OGFRL1/LTB4R2/GPR83/ACKR4/ACKR3/NPR2/NLRP6/GALR2/RAMP1/HCRTR1/LTB4R/GPR32/CXCR1/CCR10/NMUR1/CRHR1/CYSLTR1/BDKRB1/TACR1/NPBWR2/MC5R/QRFPR/NPR1/CRHR1/GPR17/AVPR1A/GLP2R/PTH1R/NPY5R/SCTR/CXCR2/VIPR2/PRLHR/NTSR2/LHCGR/MC4R/FSHR/AGTR1/NPR3/SORCS1/AGTR2/TACR2/NMBR/ADCYAP1R1/CCKBR/GALR1/GRPR/CCKAR/SORCS3/MLNR/NPY2R
MF	GO:0015077	monovalent inorganic cation transmembrane transporter activity	-0.376545	-1.71255	0.00951053	KCNJ12/SLC13A2/SLC6A16/LRRC55/KCNE4/SCN5A/KCND3/SLC34A1/SLC4A10/KCNAB1/SLC5A11/ATP1A3/KCNC1/HCN2/SLC24A4/SCN9A/KCNJ1/NDUFA4L2/SLC9A9/SLC6A2/KCNIP2/KCNQ4/PKD2/SCN11A/SLC10A6/SLC15A1/SLC15A5/SLC23A1/KCNK16/SLC1A6/GRIK1/KCNB2/KCNH5/SLC6A19/COX6A2/KCNT2/SLC6A17/SLC8A3/KCNIP4/FXYD4/KCNA4/SLC17A7/KCNK7/ABCC9/SLC5A4/SLC8A1/KCNN3/OTOP1/KCNQ5/ABCC8/HCN1/SCNN1B/KCNH2/COX7A1/SCN2B/KCNJ13/SLC6A1/KCNJ15/KCNK3…
MF	GO:0008528	G protein-coupled peptide receptor activity	-0.377412	-1.53839	0.0213865	RXFP1/NPY1R/GPR37L1/OGFRL1/LTB4R2/GPR83/ACKR4/ACKR3/NLRP6/GALR2/RAMP1/HCRTR1/LTB4R/GPR32/CXCR1/CCR10/NMUR1/CYSLTR1/BDKRB1/TACR1/NPBWR2/MC5R/QRFPR/NPR1/GPR17/AVPR1A/GLP2R/PTH1R/NPY5R/SCTR/CXCR2/VIPR2/PRLHR/NTSR2/LHCGR/MC4R/FSHR/AGTR1/NPR3/SORCS1/AGTR2/TACR2/NMBR/ADCYAP1R1/CCKBR/GALR1/GRPR/CCKAR/SORCS3/MLNR/NPY2R
BP	GO:0008544	epidermis development	-0.37909	-1.75627	0.00951053	KRTAP22-1/KRTAP13-1/KRTAP9-3/KRTAP4-9/KRTAP12-2/KRTAP25-1/KRTAP9-2/KRTAP13-3/KRTAP10-7/KRT27/LIPN/BCL2/IGFBP5/KLF4/KRTAP19-4/KRTAP9-8/KRT79/KRT38/GRHL1/KRTAP1-4/KRTAP4-11/DSC2/DSP/SATB1/KRT16/KRT20/DSG4/PTHLH/FGF7/KRT73/KRTAP1-1/EVPL/CLIC4/LCE1C/SULT2B1/FGFR1/TMC1/WNT10B/TXNIP/KRTAP10-10/FLG2/TMEM79/LCE6A/LCE1B/GRHL3/HRNR/CRABP2/FABP5/KRTAP4-4/KRTAP10-6/KRTAP19-8/KRTAP10-5/ZFP36/TP63/DSG3/BNC1/PO…
BP	GO:0035725	sodium ion transmembrane transport	-0.379394	-1.54111	0.0213546	SCN5A/SLC34A1/ATP1A3/HCN2/SLC24A4/SCN9A/SLMAP/SLC9A9/PKD2/SCN11A/SLC23A1/WNK3/SLC8A3/FXYD4/SLC17A7/SLC8A1/HCN1/SCNN1B/SCN2B/ATP2B4/SCNN1G/ASIC5/NOS1/ATP1B2/SLC9A4/FXYD1/DMD/FXYD6/SLC8A2/SLC24A5/SLC12A1/ATP1A2/SCN7A/ATP4A/ATP4B
BP	GO:0007611	learning or memory	-0.379456	-1.66209	0.00951053	NRXN2/NTRK2/CCL11/SRF/MME/GALR2/CLDN5/GPR88/MEIS2/NFATC4/PJA2/PRNP/NGF/KCNAB1/JUN/FOS/VLDLR/FGF13/JPH3/TMOD2/CRHR1/NLGN4Y/GRIN2A/ARMCX5-GPRASP2/HRH2/LMX1A/JPH4/S100B/PDE1B/MAP1A/CRHR1/SLC8A3/SLC17A7/CRHBP/DNAH11/NPTX2/NDRG4/ITGA8/PRKN/CNR1/KIT/SLC6A1/GRIA1/PRKAR2B/MAPT/CUX2/C1QL1/CNTN2/BTG2/PTN/ADCY8/RELN/SLC6A4/GHSR/NRXN3/FOXP2/NEUROG1/PAK5/SLC8A2/TACR2/ADGRB3/ATP1A2/GRPR/NPAS4/SYT4/TAC1/GABRA5/…
BP	GO:0030048	actin filament-based movement	-0.379697	-1.5332	0.026753	PDE4D/FRMD6/KCNE4/SCN5A/KCND3/DSC2/DSP/MYH2/PARVA/MYL6/CACNA2D1/GJA1/ACTA1/TNNT3/CAV1/SGCD/RYR2/KCNH2/SCN2B/CACNA1C/KCNN2/MYL3/GJC1/FLNA/DMD/CACNB2/TPM1/TMOD1/ANK2/TPM2/KCNA5/DES/ACTN2/ATP1A2/PLN/KCNE2/CTNNA3
BP	GO:0060538	skeletal muscle organ development	-0.379778	-1.57945	0.0189672	MEGF10/MSTN/WNT10B/PITX1/ATF3/MYL6/SOX17/KLHL40/MYOZ1/MYMX/S100B/ACTA1/VGLL2/MYOM2/CAV1/EGR1/DCN/RBM24/LMOD3/WNT3A/CDON/COL19A1/SVIL/DNER/CASQ1/BTG2/ASB2/P2RX2/MYOCD/BVES/CFL2/FOXP2/KLHL41/MYOM1/MYOZ2/POPDC2/HLF/SMYD1/PHOX2B
BP	GO:0010469	regulation of signaling receptor activity	-0.379868	-1.5831	0.0189672	GRIA3/CACNG2/CCL2/CNRIP1/GREM2/GRIN2A/PSCA/LDOC1/P2RY1/SHISA6/ADRB2/CRHBP/NPTX2/DKK4/GRIA1/LYNX1/GRIA4/WFIKKN2/DLG2/GSG1L/CACNG7/NLGN1/LY6H/RELN/LY6G6D/AGTR2/SHISA9/ADH7/EPGN/CGA/ACTN2/SLURP1/GRIA2/NEFL/NPTX1/ARC/TAFA4
MF	GO:0005244	voltage-gated ion channel activity	-0.379945	-1.61266	0.0126849	KCNIP1/CACNB4/SCN3A/RYR1/KCNJ8/TSPOAP1/SLC17A3/KCNIP3/IL1RAPL1/SCN4B/KCNA3/KCNH1/CLIC6/KCNJ12/CATSPER4/LRRC55/KCNE4/SCN5A/KCND3/KCNAB1/KCNC1/HCN2/CACNG2/CLIC4/HTR1B/TMC1/SCN9A/KCNJ1/GRIN2A/CACNA2D1/KCNIP2/CALHM1/KCNQ4/PKD2/CLCNKB/SCN11A/KCNK16/KCNB2/KCNH5/KCNT2/KCNIP4/KCNA4/KCNK7/CLIC3/NCS1/KCNQ5/HCN1/KCNH2/CNR1/CACNA1B/SCN2B/KCNJ13/KCNJ15/CACNA1C/CACNA2D3/KCNK3/LRRC38/KCNA2/CLCNKA/CACNG7/CACNA1H…
MF	GO:0022832	voltage-gated channel activity	-0.379945	-1.61266	0.0126849	KCNIP1/CACNB4/SCN3A/RYR1/KCNJ8/TSPOAP1/SLC17A3/KCNIP3/IL1RAPL1/SCN4B/KCNA3/KCNH1/CLIC6/KCNJ12/CATSPER4/LRRC55/KCNE4/SCN5A/KCND3/KCNAB1/KCNC1/HCN2/CACNG2/CLIC4/HTR1B/TMC1/SCN9A/KCNJ1/GRIN2A/CACNA2D1/KCNIP2/CALHM1/KCNQ4/PKD2/CLCNKB/SCN11A/KCNK16/KCNB2/KCNH5/KCNT2/KCNIP4/KCNA4/KCNK7/CLIC3/NCS1/KCNQ5/HCN1/KCNH2/CNR1/CACNA1B/SCN2B/KCNJ13/KCNJ15/CACNA1C/CACNA2D3/KCNK3/LRRC38/KCNA2/CLCNKA/CACNG7/CACNA1H…
BP	GO:0071466	cellular response to xenobiotic stimulus	-0.381272	-1.60035	0.0190342	PCK2/UGT2B28/RYR1/CYP2C18/ERRFI1/GSTM1/CYP1A1/CYP2U1/CYP2F1/CES1/CYP46A1/CYP2C9/AKR7A3/NR3C1/CYP1B1/UGT2B15/CBR3/CYP2A13/PCK1/MSTN/AKR1C1/ACY3/S100A12/RORA/PTGS1/GJB2/PDE2A/GSTA1/CYP3A4/CRHBP/SLC8A1/AADAC/EGR1/CDO1/CYP1A2/RYR2/GSTM2/AOC3/FBXO32/UGT1A1/UGT1A5/AS3MT/GSTM5/GHR/ALDH3A1/ARG1/GSTA5/ADCY8/GLYAT/GSTA2/AGTR2/UGT1A4/UGT1A7/RYR3/CASQ2/BCHE/GSTA3
MF	GO:0022836	gated channel activity	-0.381695	-1.721	0.00951053	KCNIP1/CACNB4/SCN3A/RYR1/KCNJ8/TSPOAP1/SLC17A3/P2RX1/GABRG2/KCNIP3/IL1RAPL1/SCN4B/KCNA3/KCNH1/ASIC2/CLIC6/HTR3A/KCNJ12/GABRB2/CATSPER4/LRRC55/KCNE4/SCN5A/KCND3/CLCA4/KCNAB1/KCNC1/ITPR1/HCN2/GRIA3/CLCA2/CACNG2/CLIC4/GLRA2/HTR1B/JPH3/TMC1/SCN9A/GRID1/GLRA4/HTR3B/KCNJ1/GRIN2A/CACNA2D1/KCNIP2/CALHM1/TRPM3/KCNQ4/PKD2/CLCNKB/SCN11A/JPH4/KCNK16/TMC3/GRIK1/KCNB2/KCNH5/TMEM63C/KCNT2/CHRNA2/KCNIP4/CHRNA4/K…
BP	GO:0035150	regulation of tube size	-0.383123	-1.55365	0.018706	EDN3/CHRM3/HTR2B/ACE2/GUCY1A1/HTR1A/HTR1B/ADCYAP1/UTS2B/HTR7/P2RY1/HRH2/ITGA1/GJA1/GPER1/NPR1/INS/ADRB2/PRKG1/AVPR1A/AVP/CAV1/SLC8A1/RGS2/CHGA/ADRA1A/CASR/EDN2/MTNR1B/ACTA2/NOS1/HBB/NPPC/SLC6A4/KCNMB2/KCNMB1/AGTR1/KCNMA1/KCNA5/AGTR2/ADRB3/LEP/ALOX12/ATP1A2/VIP
BP	GO:0035296	regulation of tube diameter	-0.38461	-1.55827	0.0157844	EDN3/CHRM3/HTR2B/ACE2/GUCY1A1/HTR1A/HTR1B/ADCYAP1/UTS2B/HTR7/P2RY1/HRH2/ITGA1/GJA1/GPER1/NPR1/INS/ADRB2/PRKG1/AVPR1A/AVP/CAV1/SLC8A1/RGS2/CHGA/ADRA1A/CASR/EDN2/MTNR1B/ACTA2/NOS1/HBB/NPPC/SLC6A4/KCNMB2/KCNMB1/AGTR1/KCNMA1/KCNA5/AGTR2/ADRB3/LEP/ALOX12/ATP1A2/VIP
BP	GO:0050880	regulation of blood vessel size	-0.38461	-1.55827	0.0157844	EDN3/CHRM3/HTR2B/ACE2/GUCY1A1/HTR1A/HTR1B/ADCYAP1/UTS2B/HTR7/P2RY1/HRH2/ITGA1/GJA1/GPER1/NPR1/INS/ADRB2/PRKG1/AVPR1A/AVP/CAV1/SLC8A1/RGS2/CHGA/ADRA1A/CASR/EDN2/MTNR1B/ACTA2/NOS1/HBB/NPPC/SLC6A4/KCNMB2/KCNMB1/AGTR1/KCNMA1/KCNA5/AGTR2/ADRB3/LEP/ALOX12/ATP1A2/VIP
BP	GO:0097746	regulation of blood vessel diameter	-0.38461	-1.55827	0.0157844	EDN3/CHRM3/HTR2B/ACE2/GUCY1A1/HTR1A/HTR1B/ADCYAP1/UTS2B/HTR7/P2RY1/HRH2/ITGA1/GJA1/GPER1/NPR1/INS/ADRB2/PRKG1/AVPR1A/AVP/CAV1/SLC8A1/RGS2/CHGA/ADRA1A/CASR/EDN2/MTNR1B/ACTA2/NOS1/HBB/NPPC/SLC6A4/KCNMB2/KCNMB1/AGTR1/KCNMA1/KCNA5/AGTR2/ADRB3/LEP/ALOX12/ATP1A2/VIP
BP	GO:0051668	localization within membrane	-0.386069	-1.58044	0.0124613	SHISA6/GSN/CDH2/KIF5C/GLRB/MAGI2/FLNA/REEP2/PTN/ANKS1B/DLG2/GSG1L/CACNG7/NLGN1/GRIK5/RELN/KIF5A/GHSR/MAL/LGI1/GRIK2/CALY/NRXN1/ARC
BP	GO:1904062	regulation of cation transmembrane transport	-0.386359	-1.73572	0.00951053	EDN3/GJC2/LRRC55/KCNE4/SCN5A/PRNP/RGS9/IL13/KCNAB1/KCNC1/AHNAK/GRIA3/CACNG2/CCL2/JPH3/TMC1/HAP1/CRHR1/GRIN2A/CACNA2D1/SLMAP/KCNIP2/BDKRB1/RRAD/PKD2/SNCA/JPH4/SHISA6/GPER1/DHRS7C/GEM/WNK3/CRHR1/EHD3/ADRB2/KCNIP4/FXYD4/PM20D1/CRHBP/CAV1/SLN/SLC8A1/RGS2/STAC/RYR2/KCNH2/GSTM2/TRPC1/SCN2B/ATP2B4/CACNA1C/RGS4/GRIA1/KCNN2/LRRC38/FGF14/FLNA/MTNR1B/GRIA4/NOS1/ATP1B2/CASQ1/FXYD1/DLG2/HSPA2/GSG1L/CACNG7/DMD…
BP	GO:0043271	negative regulation of ion transport	-0.386438	-1.57668	0.0157844	HTR1B/CRHR1/ADCYAP1/MAOB/RRAD/PKD2/SNCA/GEM/WNK3/CRHR1/CAV1/SLN/RGS2/KCNH2/CNR1/GSTM2/NPY5R/RGS4/CYP4F2/MTNR1B/NOS1/GNAO1/AGTR2/LEP/GPM6B/ACTN2/ATP1A2/CASQ2/PLN/VIP/KCNE2
BP	GO:0030534	adult behavior	-0.387679	-1.58174	0.0157844	CHL1/UCHL1/CRHR1/UNC79/PBX3/SNCA/CEND1/CXCL12/SLITRK1/CRHR1/SEPTIN5/CHRNA4/CHRNB4/CRHBP/RNF180/PRKN/GLRB/LGI4/SLITRK5/ALK/SEZ6L/CSTB/CNTN2/NR4A3/CHRNA3/TMOD1/GHSR/DAB1/NRXN3/KLHL1/LEP/ATP1A2/GHRL/NPY/NRXN1/CARTPT/GIP
BP	GO:0006633	fatty acid biosynthetic process	-0.387901	-1.5963	0.0124613	CYP2C9/LPL/ALOX12B/ACSM2A/ABCD2/HPGD/HPGDS/CBR1/HACD4/ACSM5/CYP7A1/FADS6/TECRL/FABP5/ACSM6/PTGS1/PTGIS/ACOT12/AVPR1A/ACACB/CYP3A4/AVP/ALOX15B/PRKAA2/CYP1A2/ANXA1/ASAH2/EDN2/ACADL/HACD1/ELOVL4/ADIPOQ/PDK4/APOA4/ALOX12/PLP1/APOC3/GIP
MF	GO:0046873	metal ion transmembrane transporter activity	-0.388283	-1.79097	0.00951053	KCNJ12/SLC13A2/CATSPER4/SLC6A16/LRRC55/KCNE4/PKD1/SCN5A/KCND3/SLC34A1/SLC4A10/KCNAB1/SLC5A11/TRPV6/ATP1A3/KCNC1/ITPR1/HCN2/CACNG2/TUSC3/SLC24A4/HTR1B/JPH3/TMC1/SCN9A/KCNJ1/GRIN2A/CACNA2D1/SLC9A9/SLC6A2/KCNIP2/CALHM1/TRPM3/KCNQ4/PKD2/SCN11A/SLC10A6/JPH4/SLC23A1/KCNK16/SLC1A6/GRIK1/KCNB2/KCNH5/SLC6A19/SLC30A8/KCNT2/SLC6A17/SLC8A3/KCNIP4/FXYD4/KCNA4/PDE2A/SLC17A7/KCNK7/ABCC9/SLC5A4/SLC8A1/KCNN3/NCS1…
BP	GO:0006805	xenobiotic metabolic process	-0.388625	-1.54691	0.0213199	GSTM1/CYP1A1/CYP2U1/CYP2F1/CES1/CYP46A1/CYP2C9/AKR7A3/CYP1B1/UGT2B15/CBR3/CYP2A13/AKR1C1/ACY3/S100A12/RORA/PTGS1/GSTA1/CYP3A4/AADAC/CDO1/CYP1A2/GSTM2/AOC3/UGT1A1/UGT1A5/AS3MT/GSTM5/GHR/ALDH3A1/GSTA5/GLYAT/GSTA2/UGT1A4/UGT1A7/BCHE/GSTA3
BP	GO:0048167	regulation of synaptic plasticity	-0.388735	-1.64125	0.0125731	PTGS2/MEF2C/ABL1/BRSK1/PRRT2/BAIAP2/DLG4/SYNGR1/RAB3A/RIMS2/NTRK2/ADGRB1/SRF/MME/RIMS3/CNTN4/EPHA4/CYP46A1/NFATC4/PRNP/SLC4A10/SCT/JPH3/CRHR1/GRIN2A/NSG1/CAMK2B/RIMS1/HRH2/SNCA/TSHZ3/JPH4/SHISA6/S100B/MAP1A/CRHR1/INS/SLC8A3/SCGN/RIMS4/KIT/FAM107A/SCTR/GRIA1/MPP2/MAPT/MAP1B/FGF14/CNTN2/PTN/LRRTM1/NLGN1/ADCY8/RELN/SLC8A2/GRIK2/CAMK2A/SHISA9/GRID2/UNC13C/KCNB1/NPAS4/SYT4/IGSF11/SORCS3/ARC/GIP
MF	GO:0022838	substrate-specific channel activity	-0.38929	-1.7891	0.00951053	KCNJ12/GABRB2/CATSPER4/LRRC55/KCNE4/PKD1/SCN5A/KCND3/CLCA4/KCNAB1/TRPV6/KCNC1/ITPR1/HCN2/GRIA3/CLCA2/CACNG2/CLIC4/SLC24A4/GLRA2/HTR1B/JPH3/TMC1/SCN9A/GRID1/GLRA4/HTR3B/KCNJ1/GRIN2A/CACNA2D1/KCNIP2/CALHM1/TRPM3/KCNQ4/PKD2/CLCNKB/SCN11A/JPH4/KCNK16/TMC3/GRIK1/KCNB2/KCNH5/TMEM63C/KCNT2/CHRNA2/KCNIP4/FXYD4/CHRNA4/KCNA4/CHRNB4/PDE2A/SLC17A7/P2RX6/KCNK7/ABCC9/CLIC3/KCNN3/NCS1/OTOP1/KCNQ5/ANO5/ABCC8/HCN…
BP	GO:0007189	adenylate cyclase-activating G protein-coupled receptor signaling pathway	-0.389984	-1.57615	0.0124613	GNG2/ADGRB1/GALR2/PTGER2/RAMP1/ADGRL3/ADGRG2/PDE4D/ADRA1D/PTHLH/ADGRD1/MRAP/CRHR1/ADCYAP1/GNAL/GPHB5/GPER1/MC5R/CALCB/CRHR1/ADRB2/PTGER3/CHGA/ADRA1A/ADGRG4/PTH1R/ATP2B4/CALCA/PTGFR/NOS1/LHCGR/ADCY5/MC4R/ADCY2/ADCY8/FSHR/RIT2/ADRB3/GPR26/ADGRB3/GALR1/GCG/PLN/VIP
BP	GO:0034764	positive regulation of transmembrane transport	-0.390281	-1.66059	0.0126849	RAP1A/CA2/HTR3A/EDN3/GJC2/LRRC55/RGS9/IL13/SLC34A1/KCNC1/CACNG2/CCL2/HAP1/CACNA2D1/KCNIP2/BDKRB1/PKD2/SNCA/GH1/GPER1/POU4F2/WNK3/INS/EHD3/ADRB2/STAC/RYR2/KCNH2/GSTM2/TRPC1/LRRC38/C1QTNF2/FGF14/FLNA/CLIP3/NOS1/NR4A3/ATP1B2/CASQ1/FXYD1/HSPA2/DMD/CACNB2/KLF15/KCNC2/RELN/JPH2/ANK2/SORBS1/KCNMB1/ADIPOQ/AKAP6/PIRT/ACTN2/LRRC52/KCNE2/ARC/GIP/KCNA1
BP	GO:0043270	positive regulation of ion transport	-0.390365	-1.72081	0.00951053	EDN3/GJC2/LRRC55/SCN5A/ACE2/RGS9/IL13/SLC34A1/CYP4A11/KCNC1/CACNG2/ATP8A2/CCL2/P2RY12/HAP1/CACNA2D1/KCNIP2/BDKRB1/P2RY1/PKD2/SNCA/GPER1/CXCL12/LPAR3/WNK3/EHD3/ADRB2/FFAR1/AVPR1A/AVP/CAV1/STAC/RYR2/KCNH2/GSTM2/TRPC1/CASR/SLC6A1/LRRC38/CYP4F2/FGF14/FLNA/NOS1/ATP1B2/CASQ1/FXYD1/HSPA2/DMD/CACNB2/KCNC2/P2RX2/RELN/SLC6A4/JPH2/ANK2/KCNMB1/APOA1/CNTN1/AKAP6/MYLK/TACR2/LEP/CAMK2A/ADCYAP1R1/FHL1/PIRT/ACTN2…
CC	GO:0098984	neuron to neuron synapse	-0.390673	-1.76613	0.00951053	CAMK1/HOMER2/PALM/RGS7BP/GRASP/NTRK2/ADGRB1/KCNH1/MAP2/GNG3/EPHA4/EFNB3/BNIP3/ADD2/PJA2/CHRM3/CLSTN2/SYT11/PRNP/RGS9/NEFH/TIAM1/PTPRS/IGSF9B/ITPR1/DCC/CACNG2/GRID1/NLGN4Y/GRIN2A/DRP2/SYT9/LRRC4C/P2RY1/EPB41L3/FABP5/SHISA6/GPER1/SLITRK1/TMEM108/BAALC/CDH2/SYN2/LRFN5/P2RX6/GAP43/LRRC4/NCS1/ITGA8/RNF112/CACNA1C/MPDZ/GRIA1/MPP2/MAGI2/DLGAP2/MAP1B/INSYN1/NOS1/ANKS1B/DLG2/LRFN2/GSG1L/CPEB1/CACNG7/CRYAB…
BP	GO:0098739	import across plasma membrane	-0.391098	-1.53092	0.0474672	PRNP/SLC34A1/TRPV6/ATP1A3/FOLR2/HCN2/SLC7A2/KCNJ1/CACNA2D1/SLC9A9/SLC1A6/SLC8A3/ABCC9/SLC8A1/RGS2/SLC2A5/KCNH2/KCNJ13/ATP2B4/KCNJ15/RGS4/ATP1B2/SLC9A4/SLC6A5/CNGA3/SLC7A3/SLC12A1/ATP1A2/KCNJ16/KCNE2/ATP4A/ATP4B
MF	GO:0022839	ion gated channel activity	-0.39125	-1.76137	0.00951053	KCNIP1/CACNB4/SCN3A/RYR1/KCNJ8/TSPOAP1/SLC17A3/P2RX1/GABRG2/KCNIP3/IL1RAPL1/SCN4B/KCNA3/KCNH1/ASIC2/CLIC6/HTR3A/KCNJ12/GABRB2/CATSPER4/LRRC55/KCNE4/SCN5A/KCND3/CLCA4/KCNAB1/KCNC1/ITPR1/HCN2/GRIA3/CLCA2/CACNG2/CLIC4/GLRA2/HTR1B/JPH3/TMC1/SCN9A/GRID1/GLRA4/HTR3B/KCNJ1/GRIN2A/CACNA2D1/KCNIP2/CALHM1/TRPM3/KCNQ4/PKD2/CLCNKB/SCN11A/JPH4/KCNK16/GRIK1/KCNB2/KCNH5/TMEM63C/KCNT2/CHRNA2/KCNIP4/CHRNA4/KCNA4/…
BP	GO:0034767	positive regulation of ion transmembrane transport	-0.393632	-1.62072	0.0124613	EDN3/GJC2/LRRC55/RGS9/IL13/SLC34A1/KCNC1/CACNG2/CCL2/HAP1/CACNA2D1/KCNIP2/BDKRB1/PKD2/SNCA/GPER1/WNK3/EHD3/ADRB2/STAC/RYR2/KCNH2/GSTM2/TRPC1/LRRC38/FGF14/FLNA/NOS1/ATP1B2/CASQ1/FXYD1/HSPA2/DMD/CACNB2/KCNC2/RELN/JPH2/ANK2/KCNMB1/AKAP6/PIRT/ACTN2/LRRC52/KCNE2/ARC/KCNA1
BP	GO:0001676	long-chain fatty acid metabolic process	-0.394001	-1.53419	0.045696	CYP2J2/PAM/MGLL/ADTRP/PTGS2/ACOT1/QKI/CYP2C18/ACSL6/CYP1A1/CYP2U1/LTC4S/CYP2F1/CYP2C9/ALOX12B/CYP4A11/CYP1B1/CYP2A13/HPGD/HPGDS/CBR1/ACSBG1/PTGS1/PTGIS/ACOT12/GSTA1/CYP3A4/ALOX15B/CYP1A2/GSTM2/ASAH2/ACADL/CYP4F2/SLC27A6/ALOX12/PLP1
MF	GO:0005216	ion channel activity	-0.394096	-1.80534	0.00951053	KCNJ12/GABRB2/CATSPER4/LRRC55/KCNE4/PKD1/SCN5A/KCND3/CLCA4/KCNAB1/TRPV6/KCNC1/ITPR1/HCN2/GRIA3/CLCA2/CACNG2/CLIC4/SLC24A4/GLRA2/HTR1B/JPH3/TMC1/SCN9A/GRID1/GLRA4/HTR3B/KCNJ1/GRIN2A/CACNA2D1/KCNIP2/CALHM1/TRPM3/KCNQ4/PKD2/CLCNKB/SCN11A/JPH4/KCNK16/TMC3/GRIK1/KCNB2/KCNH5/TMEM63C/KCNT2/CHRNA2/KCNIP4/FXYD4/CHRNA4/KCNA4/CHRNB4/PDE2A/SLC17A7/P2RX6/KCNK7/ABCC9/CLIC3/KCNN3/NCS1/OTOP1/KCNQ5/ANO5/ABCC8/HCN…
BP	GO:0003018	vascular process in circulatory system	-0.394386	-1.63922	0.0124765	EDN3/CHRM3/HTR2B/ACE2/MYLK3/GUCY1A1/HTR1A/HTR1B/ADCYAP1/BMP6/UTS2B/HTR7/AKAP12/P2RY1/HRH2/ITGA1/GJA1/GPER1/NPR1/INS/ADRB2/PRKG1/PDE2A/AVPR1A/AVP/CAV1/SLC8A1/PDE3A/RGS2/CHGA/ANGPT1/ADRA1A/CASR/EDN2/CXCR2/MTNR1B/ACTA2/NOS1/SLIT2/HBB/NPPC/SLC6A4/KCNMB2/KCNMB1/AGTR1/KCNMA1/KCNA5/AGTR2/TACR2/ADRB3/LEP/ALOX12/ATP1A2/VIP
MF	GO:0005179	hormone activity	-0.394702	-1.56888	0.0185523	CSHL1/OSTN/EDN3/CCL25/PNOC/GUCA2A/QRFP/PTHLH/POMC/INSL4/SCT/ADCYAP1/UTS2B/C1QTNF9/GPHB5/GH1/KL/CALCB/INS/AVP/MLN/GRP/EDN2/FNDC5/CALCA/TSHB/INS-IGF2/PYY/NPPC/ADIPOQ/LEP/CGA/GCG/GHRL/PENK/SPX/NPY/VIP/CARTPT/SST/PPY/GIP/GAST
BP	GO:0098754	detoxification	-0.396589	-1.58748	0.0186588	MT1E/GSTM3/MT1G/PTGS2/SELENOW/NXN/ABCG2/RGN/NFE2L2/GSTM1/LTC4S/DUOX1/AKR7A3/SOD3/HBA1/AKR1B10/HBQ1/HBD/MT1X/TXNDC2/FABP1/HBZ/MT1A/TPO/PTGS1/MT1M/HBA2/CD36/GSTA1/GSTM2/GPX6/S100A9/GPX3/HBG1/HBB/MT4/RDH12/HBM/APOA4/MT1B/MT3
BP	GO:0007612	learning	-0.396766	-1.61882	0.0124613	JUN/FOS/FGF13/JPH3/CRHR1/NLGN4Y/GRIN2A/HRH2/JPH4/PDE1B/MAP1A/CRHR1/SLC8A3/NPTX2/NDRG4/PRKN/KIT/SLC6A1/PRKAR2B/C1QL1/CNTN2/BTG2/PTN/RELN/NRXN3/FOXP2/PAK5/SLC8A2/TACR2/ADGRB3/ATP1A2/NPAS4/TAC1/GABRA5/NRXN1/BCHE/SORCS3/ARC
BP	GO:0007156	homophilic cell adhesion via plasma membrane adhesion molecules	-0.397781	-1.6551	0.0124765	PCDHGC4/PCDHGA5/PCDHGA11/PCDH19/PLXNB3/PCDHA1/FAT2/MYPN/PCDHGA4/PCDHB12/ROBO3/CDHR4/PCDHGA6/PTPRM/PCDHA10/CADM1/PCDHB15/DCHS1/PCDH11X/CNTN4/PCDHB1/TENM3/CDH22/CDH23/PCDHGB6/PCDHGC3/PCDHA13/CLSTN2/PKD1/DSC2/PCDHGA3/FAT4/PCDHB4/PCDHB5/DSG4/PCDH7/TRO/IGSF9B/PCDHGA2/PCDHGB4/PCDHGB7/CDHR3/DCHS2/PCDHGB5/RET/DSG3/KIRREL3/CDH2/PCDHA3/CDH20/CDH8/PCDH20/PALLD/CNTN6/CDH10/DSC3/CNTN2/DSC1/CDH19/PCDH11Y/NEXN/…
BP	GO:0050890	cognition	-0.400922	-1.78	0.00951053	MEIS2/NFATC4/PJA2/PRNP/NGF/KCNAB1/JUN/FOS/CBR3/VLDLR/FGF13/CHL1/TUSC3/JPH3/TMOD2/CRHR1/NLGN4Y/GRIN2A/ARMCX5-GPRASP2/HRH2/LMX1A/JPH4/S100B/PDE1B/MAP1A/CRHR1/INS/SLC8A3/CHRNA4/SOBP/SLC17A7/CRHBP/DNAH11/NPTX2/NDRG4/ITGA8/PRKN/CNR1/KIT/SLC6A1/FAM107A/GRIA1/PRKAR2B/MAPT/CUX2/GTF2A1L/TMPRSS11E/C1QL1/GPR155/CNTN2/LHCGR/BTG2/PTN/ADCY8/RELN/SLC6A4/GHSR/NRXN3/FOXP2/NEUROG1/PAK5/SLC8A2/TACR2/ADGRB3/ATP1A2/G…
BP	GO:0050806	positive regulation of synaptic transmission	-0.400928	-1.66819	0.0124765	CRH/PINK1/PPP1R9A/SYT1/NLGN2/NTRK1/PTGS2/ABL1/BAIAP2/GLUL/DLG4/RIMS2/NTRK2/MME/RIMS3/EPHA4/CA2/CYP46A1/NFATC4/CLSTN2/PRNP/LAMA2/IGSF9B/CACNG2/CCL2/HAP1/CRHR1/ADCYAP1/GRIN2A/NSG1/SYT9/RIMS1/SNCA/TSHZ3/GPER1/S100B/CRHR1/INS/SLC8A3/ADRB2/SCGN/RIMS4/ROR2/ADRA1A/CNR1/RGS4/FAM107A/MPP2/CUX2/PTN/LRRTM1/CACNG7/CACNB2/NLGN1/ADCY8/RELN/SLC8A2/LGI1/GRIK2/TACR2/IGSF11/TAC1/NRXN1/CA7/ARC/GIP
BP	GO:0098693	regulation of synaptic vesicle cycle	-0.401507	-1.57634	0.0289341	PPFIA2/PLD1/SYN1/SYT1/NLGN2/BRSK1/RAB3A/RIMS2/P2RX1/RIMS3/RAP1A/SYT11/LRRK2/HTR1B/PRKCB/SYT9/RIMS1/P2RY1/SNCA/CDH2/SEPTIN5/CHRNA4/RIMS4/SLC17A7/STXBP5L/NCS1/ADRA1A/CNR1/MAGI2/FGF14/CACNB2/NLGN1/GRIK5/CPLX3/SLC2A4/CAMK2A/SYT4/CHRM2/NRXN1
BP	GO:0030073	insulin secretion	-0.402732	-1.72444	0.00951053	CAMK2G/RFX6/TIAM1/ITPR1/GPLD1/ADCYAP1/G6PC2/SYT9/CLTRN/MYRIP/GPR27/GJA1/GPER1/GCK/SLC30A8/ISL1/FFAR1/SLC25A4/STXBP5L/CHGA/ABCC8/PRKN/CNR1/ANXA1/CASR/CACNA1C/IL1RN/MTNR1B/ADCY5/MC4R/PTPRN/KCNC2/ADCY8/SFRP1/SLC2A2/NEUROD1/CPLX3/NKX6-1/GHSR/KCNA5/EPHA5/GPR119/LEP/NNAT/KCNB1/GCG/GHRL/CARTPT/TFAP2B/GIP
CC	GO:0098978	glutamatergic synapse	-0.402855	-1.82157	0.00951053	ABLIM3/BAIAP2/NLGN4X/DLG4/PAK3/SV2A/ERBB4/ERC2/TSPOAP1/CAMK1/HOMER2/PTPRD/P2RX1/RGS7BP/GPC6/IL1RAPL1/GRASP/KCNA3/ADAM23/ACTC1/ADGRL3/EPHA4/EFNB3/RAP1A/ACTN1/HTR3A/CHRM3/CLSTN2/SYT6/NPTXR/RGS9/GRIP1/LRRK2/TIAM1/PTPRS/GUCY1A1/CACNG2/PRRT1/GRID1/WASF3/NTRK3/NLGN4Y/GRIN2A/DRP2/NSG1/CTTNBP2/LRRC4C/P2RY1/NRP2/SHISA6/SLC1A6/SLITRK1/NRG3/SLC6A17/SYN2/LRFN5/P2RX6/LRRC4/NPTX2/NCS1/CDH8/ADRA1A/CNR1/ATP2B4/G…
BP	GO:0007613	memory	-0.403074	-1.59575	0.0157744	NFATC4/PJA2/PRNP/NGF/VLDLR/FGF13/JPH3/CRHR1/GRIN2A/HRH2/LMX1A/S100B/MAP1A/CRHR1/SLC8A3/SLC17A7/ITGA8/CNR1/GRIA1/MAPT/CUX2/PTN/ADCY8/RELN/SLC6A4/PAK5/SLC8A2/NPAS4/SYT4/TAC1/SORCS3/ARC/GIP
MF	GO:0022843	voltage-gated cation channel activity	-0.403743	-1.6436	0.0124613	CACNB4/RYR1/KCNJ8/TSPOAP1/IL1RAPL1/KCNA3/KCNH1/KCNJ12/CATSPER4/LRRC55/KCNE4/KCND3/KCNAB1/KCNC1/HCN2/CACNG2/HTR1B/TMC1/KCNJ1/GRIN2A/CACNA2D1/KCNIP2/CALHM1/KCNQ4/PKD2/KCNB2/KCNH5/KCNT2/KCNA4/NCS1/KCNQ5/HCN1/KCNH2/CNR1/CACNA1B/KCNJ13/KCNJ15/CACNA1C/CACNA2D3/KCNK3/LRRC38/KCNA2/CACNG7/CACNA1H/CACNB2/KCNC2/KCNMA1/KCNA5/KCNB1/LRRC52/KCNJ16/KCNE2/KCNA1
BP	GO:0007519	skeletal muscle tissue development	-0.40384	-1.66856	0.0124613	KCNAB1/FOS/MEGF10/MSTN/WNT10B/PITX1/ATF3/MYL6/SOX17/KLHL40/MYOZ1/S100B/ACTA1/VGLL2/MYOM2/CAV1/EGR1/DCN/RBM24/LMOD3/WNT3A/CDON/COL19A1/SVIL/DNER/CASQ1/BTG2/ASB2/P2RX2/MYOCD/BVES/CFL2/FOXP2/KLHL41/MYOM1/MYOZ2/POPDC2/HLF/SMYD1/PHOX2B
BP	GO:0055067	monovalent inorganic cation homeostasis	-0.403892	-1.66584	0.0124613	RAB38/SLC4A1/SLC4A10/CYP4A11/SLC4A3/LRRK2/ATP1A3/SLC9A9/CYP11B2/NPR1/AVPR1A/AVP/SLC8A1/SCNN1B/KCNH2/RHCG/SCNN1G/CYP4F2/ATP6V1G2/C7/ATP1B2/SLC9A4/AGTR1/KCNMA1/KCNA5/AGTR2/PDK4/CCKBR/SLC12A1/ATP1A2/SCN7A/SPX/ATP6V1G3/TAC1/CA7/ATP4A/TFAP2B/ATP4B
CC	GO:0044306	neuron projection terminus	-0.404479	-1.63877	0.0124613	TH/PRRT2/BAIAP2/GLUL/DLG4/RAB3A/SLC18A2/TSPOAP1/ROR1/KCNIP3/KCNA3/NTRK2/MME/EPHA4/CHRM3/PNOC/SYT11/SLC4A10/LRRK2/KCNC1/SCRG1/HTR1B/UCHL1/ADCYAP1/PRKCB/ILK/SNCA/GPER1/SLC17A8/CRHBP/NCS1/CDH8/CASR/KCNA2/NOS1/PTPRN/DMD/GRIK5/KCNC2/PDYN/CPLX3/FLRT1/SLC18A3/ATCAY/GRIK2/GRIK3/UNC13C/PENK/SYT4/CHRM2/KCNA1
BP	GO:0050796	regulation of insulin secretion	-0.404936	-1.69968	0.00951053	G6PC2/SYT9/CLTRN/MYRIP/GPR27/GJA1/GPER1/GCK/SLC30A8/ISL1/FFAR1/SLC25A4/STXBP5L/CHGA/ABCC8/PRKN/CNR1/CASR/CACNA1C/MTNR1B/ADCY5/KCNC2/ADCY8/SFRP1/SLC2A2/NEUROD1/NKX6-1/GHSR/KCNA5/EPHA5/LEP/NNAT/KCNB1/GCG/GHRL/CARTPT/TFAP2B/GIP
BP	GO:0031644	regulation of neurological system process	-0.405846	-1.64026	0.0124613	WASF3/RIMS1/FABP5/SCN11A/SHISA6/ACPP/S100B/TMEM108/ADRB2/CHRNB4/AVPR1A/AVP/NPTX2/RGS4/CUX2/MTNR1B/NLGN1/RELN/GHSR/TMEM100/SHISA9/GHRL/SPX/IGSF11/NRXN1/VIP/CARTPT/NPTX1/NPY2R/TAFA4
BP	GO:1904064	positive regulation of cation transmembrane transport	-0.407773	-1.65639	0.0124613	EDN3/GJC2/LRRC55/RGS9/IL13/KCNC1/CACNG2/CCL2/HAP1/CACNA2D1/KCNIP2/BDKRB1/PKD2/SNCA/GPER1/WNK3/EHD3/ADRB2/STAC/RYR2/KCNH2/GSTM2/TRPC1/LRRC38/FGF14/FLNA/NOS1/ATP1B2/CASQ1/FXYD1/HSPA2/DMD/CACNB2/KCNC2/RELN/JPH2/ANK2/KCNMB1/AKAP6/PIRT/ACTN2/LRRC52/KCNE2/ARC/KCNA1
CC	GO:0044309	neuron spine	-0.407968	-1.70583	0.00951053	PALM/NTRK2/TENM2/ADGRB1/ASIC2/EPHA4/RPH3A/SYT11/LAMA2/LPAR1/TIAM1/GRIN2A/CTTNBP2/PDLIM4/APBB1/SHISA6/GPER1/SLC8A3/KCNA4/P2RX6/SLC8A1/LRRC4/ITGA8/GRIA1/MPP2/KCNN2/PRKAR2B/MAPT/MAP1B/GRIA4/NOS1/ANKS1B/CRYAB/NLGN1/MYL7/SLC8A2/CAMK2A/SHISA9/GRID2/FRMPD4/GPM6A/ACTN2/MT3/ATP1A2/PSD/GRIA2/ARC
CC	GO:0043197	dendritic spine	-0.409373	-1.70861	0.0124765	PALM/NTRK2/TENM2/ADGRB1/ASIC2/EPHA4/RPH3A/SYT11/LAMA2/LPAR1/TIAM1/GRIN2A/CTTNBP2/PDLIM4/APBB1/SHISA6/GPER1/SLC8A3/KCNA4/P2RX6/SLC8A1/LRRC4/ITGA8/GRIA1/MPP2/KCNN2/PRKAR2B/MAPT/MAP1B/GRIA4/NOS1/ANKS1B/CRYAB/NLGN1/MYL7/SLC8A2/CAMK2A/SHISA9/GRID2/FRMPD4/GPM6A/ACTN2/MT3/ATP1A2/PSD/GRIA2/ARC
BP	GO:0005976	polysaccharide metabolic process	-0.409796	-1.61047	0.0124613	IL6ST/PRKAG3/B3GNT6/EXTL1/PPP1R3F/PPP1CB/B3GNT8/NDST3/CALM1/GYG1/POMC/KHK/LEPR/NDST4/GAL3ST3/GNMT/GCK/INS/HAS1/PPP1R3G/PPP1R3A/MGAM/C1QTNF2/PPP1R3C/SORBS1/ESRRB/GYS2/PYGM/PPP1R1A/G6PC/CHIA
CC	GO:0099572	postsynaptic specialization	-0.410402	-1.85569	0.00951053	CAMK1/HOMER2/PALM/RGS7BP/GRASP/NTRK2/ADGRB1/KCNH1/MAP2/GNG3/EPHA4/EFNB3/BNIP3/ADD2/GABRB2/PJA2/CHRM3/CLSTN2/KCND3/SYT11/PRNP/RGS9/NEFH/TIAM1/PTPRS/IGSF9B/ITPR1/DCC/CACNG2/GRID1/GLRA4/NLGN4Y/GRIN2A/DRP2/LRRC4C/P2RY1/EPB41L3/FABP5/SHISA6/GPER1/SLITRK1/TMEM108/BAALC/CDH2/SYN2/LRFN5/P2RX6/GAP43/LRRC4/NCS1/ITGA8/RNF112/CACNA1C/MPDZ/GRIA1/MPP2/MAGI2/DLGAP2/MAP1B/CDH10/INSYN1/NOS1/ANKS1B/DLG2/LRFN2/GSG1…
CC	GO:0014069	postsynaptic density	-0.410708	-1.84326	0.00951053	CAMK1/HOMER2/PALM/RGS7BP/GRASP/NTRK2/ADGRB1/KCNH1/MAP2/GNG3/EPHA4/EFNB3/BNIP3/ADD2/PJA2/CHRM3/CLSTN2/SYT11/PRNP/RGS9/NEFH/TIAM1/PTPRS/IGSF9B/ITPR1/DCC/CACNG2/GRID1/NLGN4Y/GRIN2A/DRP2/LRRC4C/P2RY1/EPB41L3/FABP5/SHISA6/GPER1/SLITRK1/TMEM108/BAALC/CDH2/SYN2/LRFN5/P2RX6/GAP43/LRRC4/NCS1/ITGA8/RNF112/CACNA1C/MPDZ/GRIA1/MPP2/MAGI2/DLGAP2/MAP1B/INSYN1/NOS1/ANKS1B/DLG2/LRFN2/GSG1L/CPEB1/CACNG7/CRYAB/NLGN…
BP	GO:0032409	regulation of transporter activity	-0.412715	-1.81933	0.00951053	STOM/BCL2/PDE4D/HTR3A/LRRC55/KCNE4/PRNP/RGS9/KCNAB1/KCNC1/AHNAK/GRIA3/CACNG2/CCL2/JPH3/HAP1/CRHR1/GRIN2A/CACNA2D1/SLMAP/KCNIP2/RRAD/PKD2/SNCA/JPH4/GJA1/SHISA6/GEM/WNK3/CRHR1/INS/EHD3/ADRB2/FXYD4/PM20D1/CRHBP/CAV1/SLN/STAC/RYR2/GSTM2/SCN2B/GRIA1/LRRC38/FGF14/MTNR1B/GRIA4/NOS1/ATP1B2/CASQ1/FXYD1/DLG2/HSPA2/GSG1L/CACNG7/DMD/CACNB2/NLGN1/KCNC2/RELN/JPH2/ANK2/FXYD6/AKAP6/SHISA9/FHL1/PIRT/ACTN2/LRRC52/…
CC	GO:0032279	asymmetric synapse	-0.413469	-1.85852	0.00951053	CAMK1/HOMER2/PALM/RGS7BP/GRASP/NTRK2/ADGRB1/KCNH1/MAP2/GNG3/EPHA4/EFNB3/BNIP3/ADD2/PJA2/CHRM3/CLSTN2/SYT11/PRNP/RGS9/NEFH/TIAM1/PTPRS/IGSF9B/ITPR1/DCC/CACNG2/GRID1/NLGN4Y/GRIN2A/DRP2/LRRC4C/P2RY1/EPB41L3/FABP5/SHISA6/GPER1/SLITRK1/TMEM108/BAALC/CDH2/SYN2/LRFN5/P2RX6/GAP43/LRRC4/NCS1/ITGA8/RNF112/CACNA1C/MPDZ/GRIA1/MPP2/MAGI2/DLGAP2/MAP1B/INSYN1/NOS1/ANKS1B/DLG2/LRFN2/GSG1L/CPEB1/CACNG7/CRYAB/NLGN…
BP	GO:0051963	regulation of synapse assembly	-0.416384	-1.61937	0.0185016	SEMA4A/AMIGO1/COLQ/NLGN3/LRRC4B/LRRC24/LHFPL4/SLIT1/PPP1R9A/NLGN2/NTRK1/MEF2C/MDGA1/PTPRD/IL1RAPL1/NTRK2/ADGRB1/ASIC2/ADGRL3/CLSTN2/LINGO2/LRRN3/LRTM2/PTPRS/NTRK3/ARMCX5-GPRASP2/SNCA/SLITRK1/LRFN5/GAP43/WNT3A/SLITRK4/SLITRK5/CUX2/NTN1/LRRTM1/NLGN1/SLITRK2/GHSR/FLRT1/LRRTM3/ADGRB3/GRID2/GHRL/SLITRK3/NRXN1/EPHA7
BP	GO:0003014	renal system process	-0.416711	-1.64468	0.0124613	CYP11B2/CORO2B/GJA1/GSN/NPR1/CHRNB4/BTC/AVPR1A/AVP/ADRA1A/PRKAR2B/CYP4F2/ADCY5/HBB/ADCY2/CHRNA3/ADCY8/JCHAIN/AGTR1/KCNMA1/ADIPOQ/NPR3/AGTR2/SPX/TAC1/TFAP2B
BP	GO:0043500	muscle adaptation	-0.417144	-1.60955	0.0236507	MEF2C/MEF2A/IL6ST/MYMK/ERRFI1/HDAC4/IGFBP5/KLF4/CAMK2G/PDE9A/MSTN/MLIP/CAMK2B/GATA5/MYOZ1/GSN/ACTA1/TRIM63/RGS2/ADRA1A/ATP2B4/RGS4/PDE5A/NR4A3/KLF15/PI16/AKAP6/MYOZ2/HAND2/MYOC
CC	GO:0043025	neuronal cell body	-0.418315	-1.94466	0.00958585	PNOC/KCND3/NPTXR/PDE9A/SLC25A27/OLFM1/SLC4A10/LPAR1/KCNAB1/LRRK2/GNAT1/TIAM1/ATP1A3/PTPRS/KCNC1/IGSF9B/REG1A/FEZ1/BRINP3/MPL/PTBP2/UCHL1/PDE1A/EEF1A2/CRHR1/ADCYAP1/DPYSL5/GLRA4/DRP2/ILK/SLC6A2/AKAP12/CPE/BMPR1B/SNCA/NDN/APBB1/ITGA1/CPNE6/S100B/PDE1B/RET/KCNB2/MAP1A/CRHR1/SLC17A8/SLC8A3/ASCL1/APOB/CHRNA4/P2RX6/TTLL7/CRHBP/NPTX2/KIF5C/KCNN3/PRKAA2/PDE1C/ITGA8/ROR2/RIC3/CACNA1B/CASR/ASTN1/CACNA1C/GR…
BP	GO:0009913	epidermal cell differentiation	-0.41983	-1.89982	0.00951053	KRTAP22-1/KRTAP13-1/KRTAP9-3/KRTAP4-9/KRTAP12-2/KRTAP25-1/KRTAP9-2/KRTAP13-3/KRTAP10-7/KRT27/LIPN/KLF4/KRTAP19-4/KRTAP9-8/KRT79/KRT38/GRHL1/KRTAP1-4/KRTAP4-11/DSC2/DSP/KRT16/KRT20/DSG4/KRT73/KRTAP1-1/EVPL/CLIC4/LCE1C/SULT2B1/FGFR1/TMC1/TXNIP/KRTAP10-10/TMEM79/LCE6A/LCE1B/HRNR/KRTAP4-4/KRTAP10-6/KRTAP19-8/KRTAP10-5/ZFP36/TP63/DSG3/POU3F1/KRT6A/ALOX15B/SPRR4/SPRR1B/KRT28/ANXA1/TGM5/PALLD/SERPINB13/…
CC	GO:0045111	intermediate filament cytoskeleton	-0.420599	-1.83181	0.00951053	KRTAP22-1/KRTAP13-1/KRTAP9-3/KRTAP4-9/KRTAP12-2/KRTAP25-1/KRTAP9-2/KRTAP13-3/KRTAP10-7/KRT27/KRTAP19-4/KRTAP9-8/KRT79/PJA2/KRT38/KRTAP1-4/KRTAP4-11/DSP/NEFH/DST/PADI6/KRT16/KRT20/PHLDB2/BFSP2/KRT73/KRTAP1-1/EVPL/KRTAP10-10/KRTAP4-4/KRTAP10-6/KRTAP19-8/KRTAP10-5/GJA1/GPER1/SLC1A6/KRTAP20-4/KRT222/KRT6A/KRT28/SYNC/PPL/KRT6B/KRT33A/DLGAP2/S100A8/KRTAP4-3/KRT76/KRT74/KRTAP11-1/KRT15/LMNTD1/KRT5/PKP1/…
BP	GO:0019935	cyclic-nucleotide-mediated signaling	-0.421078	-1.80767	0.00951053	RUNDC3A/GNG2/CALM1/NPR2/NDUFS4/ADGRB1/GALR2/PTGER2/RAMP1/ADGRL3/ADGRG2/PDE4D/HTR2B/PDE9A/ADRA1D/LPAR1/GNAI1/OR51E2/PTHLH/ADGRD1/SCT/MRAP/CRHR1/ADCYAP1/GNAL/GUCY1B1/GPHB5/GPER1/MC5R/CD36/NPR1/CALCB/CRHR1/GPR62/ADRB2/PRKG1/PDE2A/RASD2/PTGER3/PDE3A/RGS2/CHGA/ADRA1A/ADGRG4/PTH1R/ATP2B4/SCTR/PRKAR2B/CALCA/MTNR1B/PTGFR/NOS1/LHCGR/ADCY5/NPPC/MC4R/ADCY2/GUCA2B/HTR5A/KCNC2/ADCY8/FSHR/EPHA5/AKAP6/RIT2/ADRB…
MF	GO:0005261	cation channel activity	-0.421097	-1.88324	0.00951053	HTR3A/KCNJ12/CATSPER4/LRRC55/KCNE4/PKD1/SCN5A/KCND3/KCNAB1/TRPV6/KCNC1/ITPR1/HCN2/GRIA3/CACNG2/SLC24A4/HTR1B/JPH3/TMC1/SCN9A/HTR3B/KCNJ1/GRIN2A/CACNA2D1/KCNIP2/CALHM1/TRPM3/KCNQ4/PKD2/SCN11A/JPH4/KCNK16/GRIK1/KCNB2/KCNH5/TMEM63C/KCNT2/CHRNA2/KCNIP4/FXYD4/CHRNA4/KCNA4/CHRNB4/PDE2A/P2RX6/KCNK7/ABCC9/KCNN3/NCS1/OTOP1/KCNQ5/ABCC8/HCN1/SCNN1B/RYR2/KCNH2/CNR1/TRPC1/CACNA1B/SCN2B/KCNJ13/KCNJ15/CACNA1C/G…
BP	GO:0050848	regulation of calcium-mediated signaling	-0.421885	-1.61723	0.030764	PDE4D/PRNP/LRRK2/ITPR1/C10orf71/JPH3/HAP1/PKD2/MYOZ1/JPH4/GSTM2/ATP2B4/MAPT/RCAN2/NOS1/DMD/P2RX2/JPH2/TMEM100/AKAP6/RIT2/MYOZ2/CASQ2/PLN
BP	GO:0050804	modulation of chemical synaptic transmission	-0.42248	-1.94763	0.00951053	NTRK2/ADGRB1/GDNF/SRF/MME/RIMS3/CNTNAP4/CNTN4/EPHA4/EFNB3/RAP1A/CA2/CYP46A1/NFATC4/CLSTN2/SYT11/PRNP/NPTXR/LAMA2/NGF/SLC4A10/LRRK2/GNAI1/PTPRS/IGSF9B/GUCY1A1/DCC/CACNG2/CCL2/HTR1B/SCT/JPH3/HAP1/CRHR1/ADCYAP1/GRID1/PRKCB/NLGN4Y/GRIN2A/GUCY1B1/NSG1/CAMK2B/SYT9/RIMS1/AKAP12/LRRC4C/P2RY1/HRH2/SNCA/TSHZ3/JPH4/SHISA6/GPER1/S100B/GRIK1/TMEM108/MAP1A/PHF24/CDH2/NRG3/CRHR1/SEPTIN5/INS/SLC8A3/ADRB2/SCGN/CH…
BP	GO:0099173	postsynapse organization	-0.422708	-1.75071	0.00951053	BAIAP2/NLGN4X/DLG4/PAK3/PTPRD/NRXN2/IL1RAPL1/GDNF/EPHA4/ACTN1/PRNP/NEFH/LRRK2/TIAM1/PTPRS/NTRK3/NLGN4Y/CAMK2B/ARMCX5-GPRASP2/NRP2/SHISA6/TMEM108/CDH2/INS/GAP43/LRRC4/GLRB/MAGI2/CUX2/PTN/DLG2/LRFN2/LRRTM1/NLGN1/RELN/GHSR/INA/GRID2/FRMPD4/CNKSR2/DGKB/GHRL/NRXN1/ZNF365/NEFL/EPHA7/ARC
BP	GO:0099177	regulation of trans-synaptic signaling	-0.423857	-1.95448	0.00951053	NTRK2/ADGRB1/GDNF/SRF/MME/RIMS3/CNTNAP4/CNTN4/EPHA4/EFNB3/RAP1A/CA2/CYP46A1/NFATC4/CLSTN2/SYT11/PRNP/NPTXR/LAMA2/NGF/SLC4A10/LRRK2/GNAI1/PTPRS/IGSF9B/GUCY1A1/DCC/CACNG2/CCL2/HTR1B/SCT/JPH3/HAP1/CRHR1/ADCYAP1/GRID1/PRKCB/NLGN4Y/GRIN2A/GUCY1B1/NSG1/CAMK2B/SYT9/RIMS1/AKAP12/LRRC4C/P2RY1/HRH2/SNCA/FABP5/TSHZ3/JPH4/SHISA6/GPER1/S100B/GRIK1/TMEM108/MAP1A/PHF24/CDH2/NRG3/CRHR1/SEPTIN5/INS/SLC8A3/ADRB2/S…
BP	GO:0019933	cAMP-mediated signaling	-0.424653	-1.78804	0.00951053	GNG2/CALM1/NDUFS4/ADGRB1/GALR2/PTGER2/RAMP1/ADGRL3/ADGRG2/PDE4D/ADRA1D/LPAR1/GNAI1/OR51E2/PTHLH/ADGRD1/SCT/MRAP/CRHR1/ADCYAP1/GNAL/GPHB5/GPER1/MC5R/CALCB/CRHR1/GPR62/ADRB2/PDE2A/RASD2/PTGER3/PDE3A/RGS2/CHGA/ADRA1A/ADGRG4/PTH1R/ATP2B4/SCTR/CALCA/PTGFR/NOS1/LHCGR/ADCY5/MC4R/ADCY2/HTR5A/ADCY8/FSHR/EPHA5/AKAP6/RIT2/ADRB3/GPR26/ADGRB3/ADCYAP1R1/GALR1/GCG/PLN/VIP/NPY2R/GIP
MF	GO:0015276	ligand-gated ion channel activity	-0.427863	-1.73509	0.00951053	ITPR1/HCN2/GRIA3/CLCA2/GLRA2/JPH3/GRID1/GLRA4/HTR3B/KCNJ1/GRIN2A/PKD2/JPH4/GRIK1/CHRNA2/CHRNA4/CHRNB4/SLC17A7/P2RX6/HCN1/SCNN1B/RYR2/KCNH2/GLRB/KCNJ13/KCNJ15/GRIA1/SCNN1G/GRIA4/ASIC5/GRIK5/CHRNA3/P2RX2/JPH2/GABRG1/CNGA3/GRIK2/GRIK3/RYR3/GRID2/KCNJ16/GABRA5/GRIA2/GABRA1/KCNE2
MF	GO:0022834	ligand-gated channel activity	-0.427863	-1.73509	0.00951053	ITPR1/HCN2/GRIA3/CLCA2/GLRA2/JPH3/GRID1/GLRA4/HTR3B/KCNJ1/GRIN2A/PKD2/JPH4/GRIK1/CHRNA2/CHRNA4/CHRNB4/SLC17A7/P2RX6/HCN1/SCNN1B/RYR2/KCNH2/GLRB/KCNJ13/KCNJ15/GRIA1/SCNN1G/GRIA4/ASIC5/GRIK5/CHRNA3/P2RX2/JPH2/GABRG1/CNGA3/GRIK2/GRIK3/RYR3/GRID2/KCNJ16/GABRA5/GRIA2/GABRA1/KCNE2
BP	GO:0055002	striated muscle cell development	-0.429144	-1.7718	0.00951053	PDGFRA/MYPN/MEF2C/MEF2A/OBSL1/MYL2/KEL/RYR1/NKX2-5/SRF/SGCB/HDAC4/ACTC1/BCL2/MYLK3/ALPK3/CSRP2/UCHL1/TMOD2/WNT10B/CAPN9/FHOD3/KLHL40/MYOZ1/ACTA1/TNNT3/SORBS2/MYOM2/SLC8A1/RGS2/SGCD/ADRA1A/LMOD3/RGS4/LRRC10/DNER/CSRP1/CASQ1/WFIKKN2/DMD/TPM1/TMOD1/P2RX2/BVES/CFL2/PI16/AKAP6/KLHL41/SYNPO2L/AGTR2/MYOM1/LMOD1/FLNC/MYOZ2/ACTN2/PGM5/CASQ2/MYH11/LDB3
BP	GO:0032412	regulation of ion transmembrane transporter activity	-0.431188	-1.88673	0.00951053	LRRC55/KCNE4/PRNP/RGS9/KCNAB1/KCNC1/AHNAK/GRIA3/CACNG2/CCL2/JPH3/HAP1/CRHR1/GRIN2A/CACNA2D1/SLMAP/KCNIP2/RRAD/PKD2/JPH4/SHISA6/GEM/WNK3/CRHR1/EHD3/ADRB2/FXYD4/CRHBP/CAV1/SLN/STAC/RYR2/GSTM2/SCN2B/GRIA1/LRRC38/FGF14/MTNR1B/GRIA4/NOS1/ATP1B2/CASQ1/FXYD1/DLG2/HSPA2/GSG1L/CACNG7/DMD/CACNB2/NLGN1/KCNC2/RELN/JPH2/ANK2/FXYD6/AKAP6/SHISA9/FHL1/PIRT/ACTN2/LRRC52/ATP1A2/CASQ2/PLN/GRIA2/KCNE2/NEFL/ARC/KCNA1
BP	GO:0007586	digestion	-0.432251	-1.74917	0.00951053	CHRM3/GUCA2A/MOGAT2/ABCG8/SI/SCT/ALPI/AKR1C1/CAPN9/FABP1/VSIG1/HRH2/SOAT2/CD36/WNK3/PRSS2/PTGER3/SLC2A5/TFF1/ASAH2/TFF2/MGAM/FABP2/FGF10/PGC/SLC26A7/PGA3/SLC9A4/GUCA2B/SLC2A2/NEUROD1/GHSR/NPR3/APOA1/NEUROG1/LEP/APOA4/CCKBR/LCT/GHRL/TAC1/GKN1/PGA5/SST/PGA4/CHIA
CC	GO:0034702	ion channel complex	-0.432683	-1.92472	0.00951053	PDE4D/HTR3A/GABRB2/CATSPER4/LRRC55/KCNE4/PKD1/SCN5A/KCND3/KCNAB1/KCNC1/HCN2/GRIA3/CACNG2/CLIC4/GLRA2/SCN9A/GLRA4/HTR3B/KCNJ1/GRIN2A/CACNA2D1/KCNIP2/KCNQ4/PKD2/CLCNKB/SCN11A/SHISA6/GRIK1/KCNB2/CHRNA2/KCNIP4/CHRNA4/KCNA4/CHRNB4/ABCC9/CLIC3/KCNQ5/ABCC8/HCN1/SCNN1B/RYR2/KCNH2/TRPC1/CACNA1B/SCN2B/GLRB/CACNA1C/GRIA1/CACNA2D3/SCNN1G/LRRC38/KCNA2/BEST4/GRIA4/UNC80/CLCNKA/NOS1/TRPC4/DLG2/HSPA2/CACNG7/CACN…
MF	GO:0005249	voltage-gated potassium channel activity	-0.434081	-1.63844	0.0379054	KCNJ12/LRRC55/KCNE4/KCND3/KCNAB1/KCNC1/HCN2/KCNJ1/KCNIP2/KCNQ4/PKD2/KCNB2/KCNH5/KCNT2/KCNA4/KCNQ5/HCN1/KCNH2/KCNJ13/KCNJ15/KCNK3/LRRC38/KCNA2/KCNC2/KCNMA1/KCNA5/KCNB1/LRRC52/KCNJ16/KCNE2/KCNA1
BP	GO:0055001	muscle cell development	-0.434092	-1.81506	0.00951053	NKX2-5/SRF/SGCB/HDAC4/ACTC1/BCL2/NFATC4/MYLK3/ALPK3/CSRP2/MEGF10/UCHL1/TMOD2/WNT10B/CAPN9/FHOD3/KLHL40/MYOZ1/ACTA1/TNNT3/SORBS2/SGCZ/MYOM2/SLC8A1/RGS2/SYPL2/SGCD/ADRA1A/LMOD3/RGS4/LRRC10/DNER/CSRP1/CASQ1/WFIKKN2/DMD/TPM1/TMOD1/P2RX2/ANK2/BVES/CFL2/PI16/AKAP6/KLHL41/SYNPO2L/AGTR2/MYOM1/LMOD1/FLNC/MYOZ2/ACTN2/PGM5/CASQ2/MYH11/LDB3
BP	GO:0070252	actin-mediated cell contraction	-0.434315	-1.70515	0.00951053	PDE4D/FRMD6/KCNE4/SCN5A/KCND3/DSC2/DSP/MYH2/PARVA/MYL6/CACNA2D1/GJA1/ACTA1/TNNT3/CAV1/SGCD/RYR2/KCNH2/SCN2B/CACNA1C/KCNN2/MYL3/GJC1/FLNA/DMD/CACNB2/TPM1/TMOD1/ANK2/TPM2/KCNA5/DES/ACTN2/ATP1A2/PLN/KCNE2/CTNNA3
BP	GO:0010927	cellular component assembly involved in morphogenesis	-0.434562	-1.71002	0.00951053	PDGFRA/MYPN/MEF2C/MEF2A/OBSL1/MYL2/NKX2-5/SRF/ACTC1/RFX2/SPACA1/MYLK3/CSRP2/PMP22/PHLDB2/TMOD2/CAPN9/FHOD3/ILK/EPB41L3/MYOZ1/ACTA1/PLA2G3/TNNT3/CCDC136/MYOM2/LMOD3/NFASC/CSRP1/CASQ1/TPM1/TMOD1/ANK2/CFL2/SPINK2/KLHL41/SYNPO2L/MYOM1/LMOD1/MYOZ2/ACTN2/PGM5/CASQ2/MYH11/LDB3
BP	GO:0007188	adenylate cyclase-modulating G protein-coupled receptor signaling pathway	-0.435276	-1.87364	0.00951053	GNG2/PALM/ADGRB1/GALR2/GNA15/PTGER2/RAMP1/ADGRL3/ADGRG2/PDE4D/S1PR3/CHRM3/ADRA1D/LPAR1/GNAI1/GNAT1/PTHLH/HTR1A/ADGRD1/HTR1B/P2RY12/MRAP/CRHR1/ADCYAP1/GNAL/GABBR1/AKAP12/P2RY1/GNAZ/PTGDR2/GPHB5/GPER1/MC5R/CALCB/CRHR1/ADRB2/PDE2A/PTGER3/RGS2/CHGA/GLP2R/ADRA1A/CNR1/ADGRG4/CASR/PTH1R/ATP2B4/CHRM4/CALCA/FLNA/PTGFR/NOS1/LHCGR/ADCY5/MC4R/GNAO1/ADCY2/HTR5A/ADCY8/FSHR/NPR3/RIT2/PSAPL1/HTR1E/ADRB3/GPR26/AD…
BP	GO:0003300	cardiac muscle hypertrophy	-0.435645	-1.62915	0.0480048	MEF2C/MEF2A/IL6ST/ERRFI1/HDAC4/HTR2B/PDE9A/TIAM1/MLIP/GATA5/SORBS2/TRIM63/RGS2/ADRA1A/RYR2/ATP2B4/RGS4/PDE5A/NR4A3/KLF15/PI16/AKAP6/AGTR2/LEP/HAND2
CC	GO:0005882	intermediate filament	-0.436422	-1.86622	0.00951053	KRTAP22-1/KRTAP13-1/KRTAP9-3/KRTAP4-9/KRTAP12-2/KRTAP25-1/KRTAP9-2/KRTAP13-3/KRTAP10-7/KRT27/KRTAP19-4/KRTAP9-8/KRT79/KRT38/KRTAP1-4/KRTAP4-11/DSP/NEFH/DST/KRT16/KRT20/BFSP2/KRT73/KRTAP1-1/EVPL/KRTAP10-10/KRTAP4-4/KRTAP10-6/KRTAP19-8/KRTAP10-5/GJA1/GPER1/KRTAP20-4/KRT222/KRT6A/KRT28/SYNC/PPL/KRT6B/KRT33A/DLGAP2/KRTAP4-3/KRT76/KRT74/KRTAP11-1/KRT15/LMNTD1/KRT5/PKP1/KRT77/KRT2/KRT34/KRT6C/KRT33B/KR…
MF	GO:0099094	ligand-gated cation channel activity	-0.437726	-1.70238	0.00951053	ITPR1/HCN2/GRIA3/JPH3/HTR3B/KCNJ1/GRIN2A/PKD2/JPH4/GRIK1/CHRNA2/CHRNA4/CHRNB4/P2RX6/HCN1/SCNN1B/RYR2/KCNH2/KCNJ13/KCNJ15/GRIA1/SCNN1G/GRIA4/ASIC5/GRIK5/CHRNA3/P2RX2/JPH2/CNGA3/GRIK2/GRIK3/RYR3/KCNJ16/GRIA2/KCNE2
BP	GO:0022898	regulation of transmembrane transporter activity	-0.439423	-1.92594	0.00951053	STOM/BCL2/PDE4D/HTR3A/LRRC55/KCNE4/PRNP/RGS9/KCNAB1/KCNC1/AHNAK/GRIA3/CACNG2/CCL2/JPH3/HAP1/CRHR1/GRIN2A/CACNA2D1/SLMAP/KCNIP2/RRAD/PKD2/SNCA/JPH4/GJA1/SHISA6/GEM/WNK3/CRHR1/INS/EHD3/ADRB2/FXYD4/PM20D1/CRHBP/CAV1/SLN/STAC/RYR2/GSTM2/SCN2B/GRIA1/LRRC38/FGF14/MTNR1B/GRIA4/NOS1/ATP1B2/CASQ1/FXYD1/DLG2/HSPA2/GSG1L/CACNG7/DMD/CACNB2/NLGN1/KCNC2/RELN/JPH2/ANK2/FXYD6/AKAP6/SHISA9/FHL1/PIRT/ACTN2/LRRC52/…
BP	GO:0099175	regulation of postsynapse organization	-0.439743	-1.68953	0.0124613	PRNP/LRRK2/TIAM1/PTPRS/NTRK3/CAMK2B/ARMCX5-GPRASP2/NRP2/SHISA6/CDH2/INS/GAP43/CUX2/PTN/LRFN2/LRRTM1/NLGN1/RELN/GHSR/GRID2/DGKB/GHRL/NRXN1/EPHA7/ARC
CC	GO:1990351	transporter complex	-0.44005	-1.97898	0.00951053	PDE4D/HTR3A/GABRB2/CATSPER4/LRRC55/KCNE4/PKD1/SCN5A/KCND3/KCNAB1/ABCG8/ATP1A3/KCNC1/HCN2/GRIA3/CACNG2/CLIC4/GLRA2/SCN9A/GLRA4/HTR3B/KCNJ1/GRIN2A/CACNA2D1/KCNIP2/KCNQ4/PKD2/CLCNKB/SCN11A/SHISA6/GRIK1/KCNB2/CHRNA2/KCNIP4/FXYD4/CHRNA4/KCNA4/CHRNB4/ABCC9/CLIC3/KCNQ5/ABCC8/HCN1/SCNN1B/RYR2/KCNH2/TRPC1/CACNA1B/SCN2B/GLRB/CACNA1C/GRIA1/CACNA2D3/SCNN1G/LRRC38/KCNA2/BEST4/GRIA4/UNC80/CLCNKA/NOS1/ATP1B2/FX…
BP	GO:0007215	glutamate receptor signaling pathway	-0.442563	-1.70762	0.00951053	PRNP/RGS9/TIAM1/GRIA3/CACNG2/CCL2/GRID1/GRIN2A/SHISA6/GRIK1/ADRB2/CRHBP/GRIA1/GRIA4/DLG2/GSG1L/CACNG7/NLGN1/GRIK5/RELN/GRIK2/GRIK3/SHISA9/GRID2/ACTN2/KCNB1/FRRS1L/GRIA2/NEFL/ARC
CC	GO:1902495	transmembrane transporter complex	-0.443272	-1.98666	0.00951053	PDE4D/HTR3A/GABRB2/CATSPER4/LRRC55/KCNE4/PKD1/SCN5A/KCND3/KCNAB1/ABCG8/ATP1A3/KCNC1/HCN2/GRIA3/CACNG2/CLIC4/GLRA2/SCN9A/GLRA4/HTR3B/KCNJ1/GRIN2A/CACNA2D1/KCNIP2/KCNQ4/PKD2/CLCNKB/SCN11A/SHISA6/GRIK1/KCNB2/CHRNA2/KCNIP4/FXYD4/CHRNA4/KCNA4/CHRNB4/ABCC9/CLIC3/KCNQ5/ABCC8/HCN1/SCNN1B/RYR2/KCNH2/TRPC1/CACNA1B/SCN2B/GLRB/CACNA1C/GRIA1/CACNA2D3/SCNN1G/LRRC38/KCNA2/BEST4/GRIA4/UNC80/CLCNKA/NOS1/ATP1B2/FX…
BP	GO:0015837	amine transport	-0.444516	-1.71896	0.00951053	SYT6/SYT11/ACE2/HTR1B/P2RY12/CRHR1/SYT9/P2RY1/SNCA/CXCL12/CRHR1/CHRNA4/AVPR1A/AVP/RGS2/CHGA/PRKN/CNR1/NPY5R/SLC6A1/RGS4/RHCG/KCNA2/ARG1/CHRNA3/GHSR/AGTR2/TACR2/LEP/SYT10/KCNB1/ATP1A2/SYT4/VIP/CARTPT/NPY2R
MF	GO:0015081	sodium ion transmembrane transporter activity	-0.444915	-1.8245	0.00951053	SLC13A2/SLC6A16/SCN5A/SLC34A1/SLC4A10/SLC5A11/ATP1A3/HCN2/SLC24A4/SCN9A/SLC9A9/SLC6A2/PKD2/SCN11A/SLC10A6/SLC23A1/SLC1A6/GRIK1/SLC6A19/SLC6A17/SLC8A3/SLC17A7/SLC5A4/SLC8A1/HCN1/SCNN1B/SCN2B/SLC6A1/SCNN1G/SLC28A1/SLC6A11/SLC5A5/ASIC5/ATP1B2/SLC9A4/SLC6A5/SLC10A4/GRIK5/SLC6A4/SLC8A2/GRIK2/SLC24A5/SLC6A15/GRIK3/SLC12A1/ATP1A2/SCN7A/SLC5A7/ATP4A/ATP4B
BP	GO:0006941	striated muscle contraction	-0.445239	-1.85554	0.00951053	CALM1/SCN4B/NKX2-5/HDAC4/ACTC1/PDE4D/KCNE4/SCN5A/KCND3/DSC2/ACE2/DSP/ATP8A2/CACNA2D1/GJA1/EHD3/SLC8A3/TNNT3/CAV1/SLC8A1/RGS2/STAC/CHGA/SGCD/ADRA1A/RYR2/KCNH2/GSTM2/SCN2B/LMOD3/CACNA1C/DMPK/DTNA/KCNN2/PDE5A/MYL3/GJC1/FLNA/TNNI3K/NOS1/CASQ1/DMD/CACNB2/TPM1/ANK2/KCNA5/KLHL41/ATP1A2/CASQ2/PLN/SMPX/SYNM/KCNE2/CTNNA3
BP	GO:0030216	keratinocyte differentiation	-0.446825	-1.99097	0.00951053	KRTAP22-1/KRTAP13-1/KRTAP9-3/KRTAP4-9/KRTAP12-2/KRTAP25-1/KRTAP9-2/KRTAP13-3/KRTAP10-7/KRT27/LIPN/KRTAP19-4/KRTAP9-8/KRT79/KRT38/GRHL1/KRTAP1-4/KRTAP4-11/DSC2/DSP/KRT16/KRT20/DSG4/KRT73/KRTAP1-1/EVPL/CLIC4/LCE1C/TXNIP/KRTAP10-10/TMEM79/LCE6A/LCE1B/HRNR/KRTAP4-4/KRTAP10-6/KRTAP19-8/KRTAP10-5/ZFP36/TP63/DSG3/POU3F1/KRT6A/ALOX15B/SPRR4/SPRR1B/KRT28/ANXA1/TGM5/PALLD/SERPINB13/PPL/KRT6B/KRT33A/CERS3/S…
MF	GO:0042562	hormone binding	-0.447301	-1.72973	0.00951053	NPR2/PIK3R1/GALR2/RAMP1/HCRTR1/CHRM3/NR3C1/ATP1A3/AMHR2/SULT2B1/LEPR/CRHR1/THRB/GPER1/MC5R/NPR1/CRHR1/CHRNA2/SHBG/CHRNA4/CHRNB4/AVPR1A/CRHBP/GLP2R/PTH1R/SCTR/AR/VIPR2/LHCGR/GHR/MC4R/CHRNA3/GHSR/NPR3/ADCYAP1R1/CCKBR/GALR1/ATP1A2/CCKAR/MLNR
CC	GO:0097060	synaptic membrane	-0.447552	-2.06059	0.00951053	HOMER2/PALM/P2RX1/RGS7BP/GABRG2/IL1RAPL1/GRASP/KCNA3/ADAM23/TENM2/ADGRB1/KCNH1/RIMS3/CNTNAP4/SSPN/EPHA4/EFNB3/HTR3A/GABRB2/PJA2/CHRM3/CLSTN2/SYT6/RPH3A/KCND3/SYT11/RGS9/GRIP1/TIAM1/PTPRS/KCNC1/IGSF9B/GRIA3/DCC/CACNG2/GLRA2/HTR1B/PRRT1/FAIM2/GRID1/GLRA4/HTR3B/NTRK3/NLGN4Y/GRIN2A/DRP2/NSG1/GABBR1/SLC6A2/RIMS1/CPE/SYNE1/LRRC4C/P2RY1/PDLIM4/FABP5/MAGEE1/APBB1/NRP2/SHISA6/GPER1/SLC1A6/GRIK1/SLITRK1/TM…
BP	GO:0007218	neuropeptide signaling pathway	-0.448986	-1.73241	0.00951053	LTB4R/PNOC/QRFP/POMC/NMUR1/GLRA2/CRHR1/ADCYAP1/GLRA4/CYSLTR1/CPE/SCG5/PTGDR2/NPBWR2/NXPH2/QRFPR/CRHR1/GPR1/NPY5R/GRP/GLRB/NXPH3/PRLHR/NTSR2/PYY/TENM1/GPR149/PDYN/SORCS1/TAC3/GALR1/PENK/GRPR/NPY/TAC1/SORCS3/CARTPT/PPY/NPY2R
BP	GO:0060048	cardiac muscle contraction	-0.450265	-1.81419	0.00951053	KCNJ8/CALM1/SCN4B/NKX2-5/HDAC4/ACTC1/PDE4D/KCNE4/SCN5A/KCND3/DSC2/ACE2/DSP/CACNA2D1/GJA1/EHD3/TNNT3/CAV1/SLC8A1/RGS2/CHGA/SGCD/ADRA1A/RYR2/KCNH2/GSTM2/SCN2B/CACNA1C/KCNN2/PDE5A/MYL3/GJC1/FLNA/TNNI3K/NOS1/DMD/CACNB2/TPM1/ANK2/KCNA5/ATP1A2/CASQ2/PLN/KCNE2/CTNNA3
BP	GO:0032411	positive regulation of transporter activity	-0.450586	-1.76559	0.00951053	HTR3A/LRRC55/RGS9/KCNC1/CACNG2/CCL2/HAP1/CACNA2D1/KCNIP2/PKD2/WNK3/EHD3/ADRB2/STAC/RYR2/GSTM2/LRRC38/FGF14/ATP1B2/CASQ1/HSPA2/DMD/CACNB2/KCNC2/RELN/JPH2/ANK2/AKAP6/PIRT/ACTN2/LRRC52/KCNE2/ARC/KCNA1
BP	GO:0006813	potassium ion transport	-0.451883	-1.95495	0.00951053	EDN3/LRRC55/KCNE4/KCND3/PRNP/KCNAB1/ATP1A3/KCNC1/HCN2/SLC24A4/P2RY12/ADCYAP1/KCNJ1/SLC9A9/KCNIP2/KCNQ4/PKD2/KCNK16/GCK/KCNB2/KCNH5/KCNT2/WNK3/KCNIP4/FXYD4/KCNA4/KCNK7/CAV1/ABCC9/KCNN3/KCNQ5/ABCC8/HCN1/KCNH2/KCNJ13/KCNJ15/RGS4/KCNK3/KCNN2/LRRC38/KCNA2/FLNA/MTNR1B/NOS1/ATP1B2/SLC9A4/FXYD1/KCNC2/ANK2/KCNMB2/KCNMB1/KCNMA1/KCNA5/AKAP6/SLC24A5/FHL1/ACTN2/KCNB1/SLC12A1/LRRC52/ATP1A2/CASQ2/KCNJ16/VIP/DPP…
BP	GO:0051952	regulation of amine transport	-0.453736	-1.7337	0.00951053	SYT6/SYT11/ACE2/HTR1B/P2RY12/CRHR1/SYT9/P2RY1/SNCA/CXCL12/CRHR1/CHRNA4/AVPR1A/AVP/RGS2/CHGA/PRKN/CNR1/NPY5R/SLC6A1/RGS4/KCNA2/ARG1/CHRNA3/GHSR/AGTR2/TACR2/LEP/SYT10/KCNB1/ATP1A2/SYT4/VIP/CARTPT/NPY2R
BP	GO:0044264	cellular polysaccharide metabolic process	-0.456239	-1.76429	0.00951053	IL6ST/PRKAG3/B3GNT6/EXTL1/PPP1R3F/PPP1CB/B3GNT8/NDST3/CALM1/GYG1/POMC/KHK/LEPR/NDST4/GAL3ST3/GNMT/GCK/INS/HAS1/PPP1R3G/PPP1R3A/MGAM/C1QTNF2/PPP1R3C/SORBS1/ESRRB/GYS2/PYGM/PPP1R1A/G6PC
CC	GO:0045211	postsynaptic membrane	-0.457501	-2.05043	0.00951053	HOMER2/P2RX1/RGS7BP/GABRG2/IL1RAPL1/GRASP/KCNA3/TENM2/ADGRB1/KCNH1/SSPN/EPHA4/EFNB3/HTR3A/GABRB2/PJA2/CHRM3/CLSTN2/RPH3A/KCND3/RGS9/GRIP1/TIAM1/PTPRS/KCNC1/IGSF9B/GRIA3/DCC/CACNG2/GLRA2/PRRT1/FAIM2/GRID1/GLRA4/HTR3B/NTRK3/NLGN4Y/GRIN2A/DRP2/NSG1/GABBR1/SYNE1/LRRC4C/P2RY1/PDLIM4/FABP5/MAGEE1/APBB1/NRP2/SHISA6/GRIK1/SLITRK1/TMEM108/BAALC/CDH2/CHRNA2/SLC8A3/CHRNA4/CHRNB4/LRFN5/P2RX6/SLC8A1/LRRC4/NCS…
MF	GO:0016247	channel regulator activity	-0.457835	-1.86798	0.00951053	CALM1/NRXN2/KCNIP3/SCN4B/BCL2/LRRC55/KCNE4/KCNAB1/ITPR1/FGF13/CACNG2/GPLD1/PRKCB/KCNIP2/RRAD/GEM/WNK3/ADRB2/KCNIP4/FXYD4/PRKG1/CAV1/ABCC9/SCN2B/ATP2B4/LYNX1/LRRC38/FLNA/NOS1/FXYD1/CACNG7/INAFM2/KCNMB2/KCNMB1/FXYD6/HPCAL4/LRRC52/PLN/NPY/NRXN1/DPP10/KCNE2/DPP6/NPY2R
BP	GO:0019217	regulation of fatty acid metabolic process	-0.45909	-1.72995	0.0182485	FABP1/CYP7A1/PLIN5/SNCA/FABP5/INS/AVPR1A/ACACB/AVP/CAV1/PRKAA2/CNR1/ANXA1/ACADL/C1QTNF2/NR4A3/GHSR/ADIPOQ/PDK4/APOA4/APOC3/GIP
MF	GO:0005267	potassium channel activity	-0.459223	-1.83133	0.00951053	KCNJ12/LRRC55/KCNE4/KCND3/KCNAB1/KCNC1/HCN2/KCNJ1/KCNIP2/KCNQ4/PKD2/KCNK16/GRIK1/KCNB2/KCNH5/KCNT2/KCNIP4/FXYD4/KCNA4/KCNK7/ABCC9/KCNN3/KCNQ5/ABCC8/HCN1/KCNH2/KCNJ13/KCNJ15/KCNK3/KCNN2/LRRC38/KCNA2/GRIK5/KCNC2/KCNMB2/KCNMB1/KCNMA1/KCNA5/GRIK2/GRIK3/KCNB1/LRRC52/KCNJ16/KCNE2/KCNA1
CC	GO:0044291	cell-cell contact zone	-0.460487	-1.68079	0.0457147	ACTN1/VCL/SCN5A/DSC2/DSP/TIAM1/AHNAK/FGF13/AJAP1/GJA1/CDH2/JAM3/SLC8A1/GJC1/FXYD1/ANK2/KCNA5/DES/AKAP6/PCDH9/ATP1A2/PGM5/CTNNA3
BP	GO:0060079	excitatory postsynaptic potential	-0.460723	-1.77511	0.00951053	GLRA2/GLRA4/GRIN2A/RIMS1/SNCA/TMEM108/CHRNA2/ADRB2/CHRNA4/CHRNB4/SLC17A7/P2RX6/GLRB/RGS4/MPP2/CUX2/NLGN1/GRIK5/CHRNA3/P2RX2/RELN/GRIK2/GRID2/GHRL/NPAS4/IGSF11/NRXN1/NPY2R
CC	GO:0042734	presynaptic membrane	-0.461444	-1.90902	0.00951053	SYT1/NLGN2/GRM6/PRRT2/ROGDI/STX2/ERBB4/ERC2/RIMS2/GAD2/P2RX1/RGS7BP/KCNA3/ADAM23/KCNH1/RIMS3/CNTNAP4/EPHA4/EFNB3/HTR3A/CHRM3/SYT11/PTPRS/KCNC1/HTR1B/GRIN2A/GABBR1/SLC6A2/RIMS1/P2RY1/APBB1/GPER1/SLC1A6/GRIK1/CDH2/CHRNA4/RIMS4/PDE2A/ADRA1A/CNR1/ATP2B4/SLC6A1/CNTN6/SNAP91/KCNA2/NTNG1/SLC6A11/CDH10/SLC6A5/GRIK5/KCNC2/ADCY8/CPLX3/SLC6A4/FXYD6/CNTN1/CADM3/GRIK2/GRIK3/GPM6A/UNC13C/KCTD8/CHRM2/GABRA5/NRX…
MF	GO:0022853	active ion transmembrane transporter activity	-0.46211	-1.66093	0.0489585	ATP2B4/ATP6V1G2/ATP1B2/ATP2B3/ATP1A2/ATP2B2/ATP6V1G3/ATP4A/ATP4B
MF	GO:0042625	ATPase coupled ion transmembrane transporter activity	-0.46211	-1.66093	0.0489585	ATP2B4/ATP6V1G2/ATP1B2/ATP2B3/ATP1A2/ATP2B2/ATP6V1G3/ATP4A/ATP4B
CC	GO:0044304	main axon	-0.462303	-1.66879	0.045696	GJC2/KCNAB1/TIAM1/KCNC1/EPB41L3/APBB1/MAP1A/CRHBP/MAPT/MAP1B/KCNA2/NFASC/CNTN2/DLG2/KCNC2/TUBB4A/ANK2/CNGA3/MYOC/KCNA1
BP	GO:0019233	sensory perception of pain	-0.462633	-1.79234	0.00951053	CCL2/UCHL1/ADCYAP1/SCN9A/GRIN2A/BDKRB1/P2RY1/NDN/FABP5/SCN11A/CXCL12/ACPP/PHF24/CHRNA4/CNR1/MRGPRX2/KCNA2/DLG2/TMEM100/PENK/SPX/TAC1/VIP/NPY2R/TAFA4/GIP/KCNA1
BP	GO:0042391	regulation of membrane potential	-0.463166	-2.12818	0.00951053	P2RX1/RNF122/RGS7BP/GABRG2/SCN4B/NTRK2/KCNH1/RIMS3/GJD2/ASIC2/BCL2/BCO2/GPR88/HTR3A/BNIP3/GABRB2/KCNE4/SCN5A/KCND3/DSC2/DSP/SLC25A27/SLC34A1/LRRK2/JUN/ATP1A3/KCNC1/IGSF9B/HCN2/FGF13/GRIA3/CACNG2/GLRA2/ADCYAP1/SCN9A/GRID1/GLRA4/HTR3B/NTRK3/GRIN2A/CACNA2D1/SLMAP/GABBR1/RIMS1/KCNIP2/MLLT11/SNCA/SCN11A/GJA1/KCNK16/GPER1/SLC1A6/CD36/PID1/GRIK1/TMEM108/SPART/KCNH5/KCNT2/CHRNA2/EHD3/ADRB2/CHRNA4/RIMS4/C…
BP	GO:0071804	cellular potassium ion transport	-0.463898	-1.98561	0.00951053	KCNJ12/EDN3/LRRC55/KCNE4/KCND3/PRNP/KCNAB1/ATP1A3/KCNC1/HCN2/SLC24A4/P2RY12/KCNJ1/SLC9A9/KCNIP2/KCNQ4/PKD2/KCNK16/KCNB2/KCNH5/KCNT2/WNK3/KCNIP4/FXYD4/KCNA4/KCNK7/CAV1/ABCC9/KCNN3/KCNQ5/ABCC8/HCN1/KCNH2/KCNJ13/KCNJ15/RGS4/KCNK3/KCNN2/LRRC38/KCNA2/FLNA/MTNR1B/ATP1B2/SLC9A4/KCNC2/ANK2/KCNMB2/KCNMB1/KCNMA1/KCNA5/AKAP6/SLC24A5/FHL1/ACTN2/KCNB1/SLC12A1/LRRC52/ATP1A2/CASQ2/KCNJ16/DPP10/KCNE2/ATP4A/DPP6/…
BP	GO:0071805	potassium ion transmembrane transport	-0.463898	-1.98561	0.00951053	KCNJ12/EDN3/LRRC55/KCNE4/KCND3/PRNP/KCNAB1/ATP1A3/KCNC1/HCN2/SLC24A4/P2RY12/KCNJ1/SLC9A9/KCNIP2/KCNQ4/PKD2/KCNK16/KCNB2/KCNH5/KCNT2/WNK3/KCNIP4/FXYD4/KCNA4/KCNK7/CAV1/ABCC9/KCNN3/KCNQ5/ABCC8/HCN1/KCNH2/KCNJ13/KCNJ15/RGS4/KCNK3/KCNN2/LRRC38/KCNA2/FLNA/MTNR1B/ATP1B2/SLC9A4/KCNC2/ANK2/KCNMB2/KCNMB1/KCNMA1/KCNA5/AKAP6/SLC24A5/FHL1/ACTN2/KCNB1/SLC12A1/LRRC52/ATP1A2/CASQ2/KCNJ16/DPP10/KCNE2/ATP4A/DPP6/…
BP	GO:0051899	membrane depolarization	-0.464379	-1.74988	0.0153141	CACNA1G/ABL1/GPD1L/CACNB4/SCN3A/SCN4B/BCL2/SCN5A/LRRK2/JUN/HCN2/CACNG2/SCN9A/CACNA2D1/SLMAP/MLLT11/SCN11A/GJA1/CHRNA4/CAV1/SLC8A1/DCN/KCNH2/CACNA1B/SCN2B/CACNA1C/CACNA1H/CACNB2/ANK2/FHL1/ALOX12/ATP1A2/SCN7A/MYOC
BP	GO:0060078	regulation of postsynaptic membrane potential	-0.4649	-1.88844	0.00951053	LRRK2/IGSF9B/GRIA3/GLRA2/ADCYAP1/GRID1/GLRA4/GRIN2A/GABBR1/RIMS1/SNCA/GRIK1/TMEM108/CHRNA2/ADRB2/CHRNA4/CHRNB4/SLC17A7/P2RX6/GLRB/RGS4/GRIA1/MPP2/CUX2/FGF14/INSYN1/NLGN1/GRIK5/CHRNA3/P2RX2/RELN/GABRG1/GRIK2/GRIK3/GRID2/GHRL/NPAS4/IGSF11/GABRA5/NRXN1/GABRA1/NPY2R/KCNA1
BP	GO:0014896	muscle hypertrophy	-0.465461	-1.75688	0.0124613	MEF2C/MEF2A/IL6ST/MYMK/ERRFI1/HDAC4/IGFBP5/HTR2B/PDE9A/TIAM1/MSTN/MLIP/GATA5/SORBS2/TRIM63/RGS2/ADRA1A/RYR2/ATP2B4/RGS4/PDE5A/NR4A3/KLF15/PI16/AKAP6/AGTR2/LEP/HAND2/MYOC
BP	GO:0014897	striated muscle hypertrophy	-0.466271	-1.75264	0.0153141	MEF2C/MEF2A/IL6ST/MYMK/ERRFI1/HDAC4/IGFBP5/HTR2B/PDE9A/TIAM1/MLIP/GATA5/SORBS2/TRIM63/RGS2/ADRA1A/RYR2/ATP2B4/RGS4/PDE5A/NR4A3/KLF15/PI16/AKAP6/AGTR2/LEP/HAND2/MYOC
MF	GO:0015079	potassium ion transmembrane transporter activity	-0.467307	-1.93221	0.00951053	KCNJ12/LRRC55/KCNE4/KCND3/KCNAB1/ATP1A3/KCNC1/HCN2/SLC24A4/KCNJ1/SLC9A9/KCNIP2/KCNQ4/PKD2/KCNK16/GRIK1/KCNB2/KCNH5/KCNT2/KCNIP4/FXYD4/KCNA4/KCNK7/ABCC9/KCNN3/KCNQ5/ABCC8/HCN1/KCNH2/KCNJ13/KCNJ15/KCNK3/KCNN2/LRRC38/KCNA2/ATP1B2/SLC9A4/GRIK5/KCNC2/KCNMB2/KCNMB1/KCNMA1/KCNA5/GRIK2/SLC24A5/GRIK3/KCNB1/SLC12A1/LRRC52/ATP1A2/KCNJ16/KCNE2/ATP4A/ATP4B/KCNA1
MF	GO:0019829	cation-transporting ATPase activity	-0.467429	-1.67372	0.0475321	ATP2B4/ATP6V1G2/ATP1B2/ATP2B3/ATP1A2/ATP2B2/ATP6V1G3/ATP4A/ATP4B
BP	GO:1903522	regulation of blood circulation	-0.467431	-2.06969	0.00951053	ATP5PF/P2RX1/CALM1/NPR2/KCNIP3/SEMA3A/SCN4B/NKX2-5/HDAC4/ASIC2/PTGER2/PDE4D/KCNJ12/EDN3/CHRM3/KCNE4/SCN5A/KCND3/DSC2/ACE2/DSP/OR51E2/ATP1A3/ITPR1/FGF13/CACNG2/THRB/RNLS/CACNA2D1/KCNIP2/IL2/HRH2/CELF2/GJA1/NPR1/EHD3/SLC8A3/KCNIP4/FXYD4/AVPR1A/AVP/CAV1/ABCC9/SLC8A1/RGS2/CHGA/ADRA1A/RYR2/KCNH2/GSTM2/TRPC1/CACNA1B/SCN2B/CASR/ATP2B4/EDN2/CACNA1C/RGS4/DMPK/CACNA2D3/KCNK3/KCNN2/PDE5A/MYL3/GJC1/FLNA/TNNI…
BP	GO:0003015	heart process	-0.470275	-2.07902	0.00951053	TH/ACE/MYL2/GPD1L/KCNIP1/CACNB4/RYR1/KCNJ8/ATP5PF/CALM1/NPR2/KCNIP3/SEMA3A/SCN4B/NKX2-5/HDAC4/ACTC1/PDE4D/KCNJ12/EDN3/KCNE4/SCN5A/KCND3/DSC2/ACE2/DSP/WWTR1/ATP1A3/ITPR1/CACNG2/THRB/RNLS/CACNA2D1/KCNIP2/IL2/CELF2/GJA1/NPR1/EHD3/SLC8A3/TNNT3/KCNIP4/SGCZ/FXYD4/AVPR1A/CAV1/ABCC9/SLC8A1/RGS2/CHGA/SGCD/ADRA1A/RYR2/KCNH2/GSTM2/TRPC1/CACNA1B/SCN2B/ATP2B4/EDN2/CACNA1C/RGS4/DMPK/CACNA2D3/KCNK3/KCNN2/PDE5A/…
MF	GO:0005200	structural constituent of cytoskeleton	-0.472924	-1.82882	0.00951053	CYLC1/TLN1/TUBG2/ADD2/DSP/NEFH/KRT16/KRT20/BFSP2/EPB41L3/TUBB6/ACTA1/TUBA1A/SORBS2/TUBAL3/KRT6A/PPL/KRT6B/LOR/KRT15/KRT5/KRT2/DMD/TPM1/TUBB4A/ANK2/TUBA3C/DES/INA/NEFM/SYNM/NEFL/KRT31
MF	GO:0099106	ion channel regulator activity	-0.473069	-1.87286	0.00951053	LRRC55/KCNE4/KCNAB1/ITPR1/PRKCB/KCNIP2/RRAD/GEM/WNK3/ADRB2/KCNIP4/FXYD4/PRKG1/CAV1/ABCC9/LYNX1/LRRC38/FLNA/FXYD1/CACNG7/INAFM2/KCNMB2/KCNMB1/FXYD6/HPCAL4/LRRC52/PLN/NPY/NRXN1/DPP10/KCNE2/DPP6/NPY2R
BP	GO:0007193	adenylate cyclase-inhibiting G protein-coupled receptor signaling pathway	-0.474926	-1.78185	0.00951053	S1PR3/CHRM3/LPAR1/GNAI1/HTR1A/HTR1B/P2RY12/GNAL/GABBR1/AKAP12/P2RY1/GNAZ/PTGDR2/PDE2A/RGS2/CASR/CHRM4/FLNA/ADCY5/ADCY2/HTR5A/ADCY8/NPR3/PSAPL1/HTR1E/GRIK3/CHRM2/NPY2R
BP	GO:0060047	heart contraction	-0.475736	-2.09651	0.00951053	TH/ACE/MYL2/GPD1L/KCNIP1/CACNB4/RYR1/KCNJ8/ATP5PF/CALM1/NPR2/KCNIP3/SEMA3A/SCN4B/NKX2-5/HDAC4/ACTC1/PDE4D/KCNJ12/EDN3/KCNE4/SCN5A/KCND3/DSC2/ACE2/DSP/ATP1A3/ITPR1/CACNG2/THRB/RNLS/CACNA2D1/KCNIP2/IL2/CELF2/GJA1/NPR1/EHD3/SLC8A3/TNNT3/KCNIP4/SGCZ/FXYD4/AVPR1A/CAV1/ABCC9/SLC8A1/RGS2/CHGA/SGCD/ADRA1A/RYR2/KCNH2/GSTM2/TRPC1/CACNA1B/SCN2B/ATP2B4/EDN2/CACNA1C/RGS4/DMPK/CACNA2D3/KCNK3/KCNN2/PDE5A/MYL3/G…
BP	GO:2001257	regulation of cation channel activity	-0.476203	-1.98458	0.00951053	LRRC55/KCNE4/RGS9/KCNAB1/KCNC1/AHNAK/GRIA3/CACNG2/CCL2/JPH3/HAP1/CRHR1/GRIN2A/CACNA2D1/SLMAP/KCNIP2/RRAD/PKD2/JPH4/SHISA6/GEM/CRHR1/EHD3/ADRB2/CRHBP/CAV1/STAC/GSTM2/GRIA1/LRRC38/FGF14/MTNR1B/GRIA4/NOS1/CASQ1/DLG2/GSG1L/CACNG7/DMD/CACNB2/NLGN1/KCNC2/RELN/JPH2/ANK2/AKAP6/SHISA9/PIRT/ACTN2/LRRC52/CASQ2/PLN/GRIA2/KCNE2/NEFL/ARC/KCNA1
BP	GO:0051965	positive regulation of synapse assembly	-0.477103	-1.72221	0.0369481	PTPRD/IL1RAPL1/NTRK2/ADGRB1/ASIC2/ADGRL3/CLSTN2/LINGO2/LRRN3/LRTM2/NTRK3/ARMCX5-GPRASP2/SLITRK1/SLITRK4/SLITRK5/CUX2/LRRTM1/NLGN1/SLITRK2/FLRT1/LRRTM3/ADGRB3/GRID2/GHRL/SLITRK3/NRXN1
BP	GO:0051187	cofactor catabolic process	-0.477707	-1.69887	0.0323733	DUOX1/HBA1/HBQ1/CBR3/HBD/HBZ/SNCA/TPO/ASPDH/HBA2/UGT1A1/CYP4F2/GPX3/HBG1/HBB/UGT1A4/HBM/APOA4/MT3
BP	GO:0006942	regulation of striated muscle contraction	-0.480607	-1.82906	0.00951053	CALM1/NKX2-5/HDAC4/PDE4D/SCN5A/DSC2/ACE2/DSP/FGF13/EHD3/SLC8A3/TNNT3/CAV1/SLC8A1/RGS2/CHGA/ADRA1A/RYR2/GSTM2/CACNA1C/DMPK/PDE5A/MYL3/FLNA/TNNI3K/NOS1/CASQ1/DMD/ANK2/ATP1A2/CASQ2/PLN/CTNNA3
BP	GO:0032414	positive regulation of ion transmembrane transporter activity	-0.481726	-1.86631	0.00951053	HTR3A/LRRC55/RGS9/KCNC1/CACNG2/CCL2/HAP1/CACNA2D1/KCNIP2/PKD2/WNK3/EHD3/ADRB2/STAC/RYR2/GSTM2/LRRC38/FGF14/ATP1B2/CASQ1/HSPA2/DMD/CACNB2/KCNC2/RELN/JPH2/ANK2/AKAP6/PIRT/ACTN2/LRRC52/KCNE2/ARC/KCNA1
BP	GO:0005977	glycogen metabolic process	-0.482227	-1.76278	0.0204617	IL6ST/PRKAG3/PPP1R3F/PPP1CB/CALM1/GYG1/POMC/KHK/LEPR/GNMT/GCK/INS/PPP1R3G/PPP1R3A/C1QTNF2/PPP1R3C/SORBS1/ESRRB/GYS2/PYGM/PPP1R1A/G6PC
CC	GO:0099055	integral component of postsynaptic membrane	-0.482417	-1.90625	0.00951053	EPHA4/EFNB3/HTR3A/GABRB2/CHRM3/CLSTN2/KCND3/PTPRS/KCNC1/DCC/CACNG2/PRRT1/GRID1/GLRA4/NTRK3/GRIN2A/LRRC4C/NRP2/SHISA6/SLITRK1/CDH2/SLC8A3/LRFN5/P2RX6/SLC8A1/LRRC4/ADRA1A/SLC6A1/GRIA1/SLC6A11/CDH10/LRFN2/GSG1L/LRRTM1/CACNG7/NLGN1/HTR5A/GRIK5/SLC6A4/FXYD6/LRRTM3/SHISA9/GRID2/SLITRK3/CHRM2/GABRA5/GABRA1/SORCS3/EPHA7/KCNA1
BP	GO:0031424	keratinization	-0.482871	-2.08396	0.00951053	KRTAP22-1/KRTAP13-1/KRTAP9-3/KRTAP4-9/KRTAP12-2/KRTAP25-1/KRTAP9-2/KRTAP13-3/KRTAP10-7/KRT27/LIPN/KRTAP19-4/KRTAP9-8/KRT79/KRT38/KRTAP1-4/KRTAP4-11/DSC2/DSP/KRT16/KRT20/DSG4/KRT73/KRTAP1-1/EVPL/LCE1C/KRTAP10-10/TMEM79/LCE6A/LCE1B/HRNR/KRTAP4-4/KRTAP10-6/KRTAP19-8/KRTAP10-5/DSG3/KRT6A/SPRR4/SPRR1B/KRT28/TGM5/PPL/KRT6B/KRT33A/SPRR2D/SPINK6/KRTAP4-3/KRT76/DSC3/LOR/KRT74/RPTN/KRTAP11-1/KRT15/KRT5/PKP…
BP	GO:0055117	regulation of cardiac muscle contraction	-0.483246	-1.77941	0.0123962	CALM1/NKX2-5/HDAC4/PDE4D/SCN5A/DSC2/ACE2/DSP/FGF13/EHD3/CAV1/SLC8A1/RGS2/CHGA/ADRA1A/RYR2/GSTM2/CACNA1C/PDE5A/FLNA/TNNI3K/NOS1/DMD/ANK2/ATP1A2/CASQ2/PLN/CTNNA3
CC	GO:0034703	cation channel complex	-0.483551	-2.0835	0.00951053	PDE4D/HTR3A/CATSPER4/LRRC55/KCNE4/PKD1/SCN5A/KCND3/KCNAB1/KCNC1/HCN2/GRIA3/CACNG2/SCN9A/HTR3B/KCNJ1/GRIN2A/CACNA2D1/KCNIP2/KCNQ4/PKD2/SCN11A/SHISA6/GRIK1/KCNB2/KCNIP4/KCNA4/ABCC9/KCNQ5/ABCC8/HCN1/SCNN1B/RYR2/KCNH2/TRPC1/CACNA1B/SCN2B/CACNA1C/GRIA1/CACNA2D3/SCNN1G/LRRC38/KCNA2/GRIA4/UNC80/NOS1/TRPC4/DLG2/HSPA2/CACNG7/CACNA1H/CACNB2/NLGN1/GRIK5/KCNC2/KCNMB2/KCNMB1/KCNMA1/KCNA5/AKAP6/GRIK2/TRPC5/GRI…
CC	GO:0099056	integral component of presynaptic membrane	-0.487879	-1.78348	0.0179505	P2RX1/KCNA3/ADAM23/EPHA4/EFNB3/HTR3A/CHRM3/SYT11/PTPRS/KCNC1/HTR1B/P2RY1/SLC1A6/CDH2/CHRNA4/ADRA1A/CNR1/ATP2B4/SLC6A1/KCNA2/SLC6A11/CDH10/SLC6A5/GRIK5/ADCY8/SLC6A4/FXYD6/CADM3/GPM6A/CHRM2/GABRA5/NRXN1/KCNA1
BP	GO:0007588	excretion	-0.489854	-1.74207	0.0254119	ABCG8/POU3F3/KCNJ1/CLCNKB/NPR1/CHRNB4/AVPR1A/AVP/SCNN1B/ADRA1A/SCNN1G/CLCNKA/GUCA2B/CHRNA3/AGTR1/KCNMA1/AGTR2/TACR2/UGT1A7/SPX/TAC1
CC	GO:0098936	intrinsic component of postsynaptic membrane	-0.490199	-1.95122	0.00951053	EPHA4/EFNB3/HTR3A/GABRB2/CHRM3/CLSTN2/KCND3/PTPRS/KCNC1/DCC/CACNG2/PRRT1/GRID1/GLRA4/NTRK3/GRIN2A/LRRC4C/NRP2/SHISA6/SLITRK1/CDH2/SLC8A3/LRFN5/P2RX6/SLC8A1/LRRC4/ADRA1A/SLC6A1/GRIA1/SLC6A11/CDH10/CNTN2/LRFN2/GSG1L/LRRTM1/CACNG7/NLGN1/HTR5A/GRIK5/SLC6A4/FXYD6/CNTN1/LRRTM3/SHISA9/GRID2/SLITRK3/CHRM2/GABRA5/GABRA1/SORCS3/EPHA7/KCNA1
BP	GO:1900449	regulation of glutamate receptor signaling pathway	-0.491343	-1.75662	0.0277101	PRNP/RGS9/GRIA3/CACNG2/CCL2/GRIN2A/SHISA6/ADRB2/CRHBP/GRIA1/GRIA4/DLG2/GSG1L/CACNG7/NLGN1/RELN/SHISA9/ACTN2/FRRS1L/GRIA2/NEFL/ARC
CC	GO:0008076	voltage-gated potassium channel complex	-0.491726	-1.85602	0.00951053	DLG4/KCNIP1/KCNJ8/KCNIP3/KCNA3/KCNH1/LRRC55/KCNE4/KCND3/KCNAB1/KCNC1/HCN2/KCNJ1/KCNIP2/KCNQ4/KCNB2/KCNIP4/KCNA4/KCNQ5/HCN1/KCNH2/LRRC38/KCNA2/DLG2/KCNC2/KCNMB2/KCNMB1/KCNMA1/KCNA5/KCNB1/LRRC52/KCNJ16/DPP10/KCNE2/DPP6/KCNA1
BP	GO:1901019	regulation of calcium ion transmembrane transporter activity	-0.492519	-1.85592	0.00951053	AHNAK/JPH3/HAP1/CRHR1/CACNA2D1/RRAD/PKD2/JPH4/GEM/CRHR1/EHD3/SLN/STAC/RYR2/GSTM2/FGF14/NOS1/CASQ1/HSPA2/DMD/CACNB2/JPH2/ANK2/AKAP6/ATP1A2/CASQ2/PLN/KCNE2
BP	GO:0008016	regulation of heart contraction	-0.492905	-2.14406	0.00951053	ATP5PF/CALM1/NPR2/KCNIP3/SEMA3A/SCN4B/NKX2-5/HDAC4/PDE4D/KCNJ12/EDN3/KCNE4/SCN5A/KCND3/DSC2/ACE2/DSP/ATP1A3/ITPR1/FGF13/CACNG2/THRB/RNLS/CACNA2D1/KCNIP2/IL2/CELF2/GJA1/NPR1/EHD3/SLC8A3/KCNIP4/FXYD4/AVPR1A/CAV1/ABCC9/SLC8A1/RGS2/CHGA/ADRA1A/RYR2/KCNH2/GSTM2/TRPC1/CACNA1B/SCN2B/ATP2B4/EDN2/CACNA1C/RGS4/DMPK/CACNA2D3/KCNK3/KCNN2/PDE5A/MYL3/GJC1/FLNA/TNNI3K/NOS1/ATP1B2/CASQ1/FXYD1/NPPC/GNAO1/CACNG7/C…
BP	GO:0006073	cellular glucan metabolic process	-0.492908	-1.80629	0.015196	IL6ST/PRKAG3/PPP1R3F/PPP1CB/CALM1/GYG1/POMC/KHK/LEPR/GNMT/GCK/INS/PPP1R3G/PPP1R3A/MGAM/C1QTNF2/PPP1R3C/SORBS1/ESRRB/GYS2/PYGM/PPP1R1A/G6PC
BP	GO:0044042	glucan metabolic process	-0.492908	-1.80629	0.015196	IL6ST/PRKAG3/PPP1R3F/PPP1CB/CALM1/GYG1/POMC/KHK/LEPR/GNMT/GCK/INS/PPP1R3G/PPP1R3A/MGAM/C1QTNF2/PPP1R3C/SORBS1/ESRRB/GYS2/PYGM/PPP1R1A/G6PC
MF	GO:0017046	peptide hormone binding	-0.495453	-1.67659	0.0473857	NPR2/PIK3R1/GALR2/RAMP1/HCRTR1/LEPR/CRHR1/NPR1/CRHR1/AVPR1A/CRHBP/GLP2R/PTH1R/SCTR/VIPR2/GHR/MC4R/GHSR/NPR3/ADCYAP1R1/CCKBR/GALR1/CCKAR
CC	GO:0099699	integral component of synaptic membrane	-0.495694	-2.04095	0.00951053	EPHA4/EFNB3/HTR3A/GABRB2/CHRM3/CLSTN2/SYT6/KCND3/SYT11/PTPRS/KCNC1/DCC/CACNG2/HTR1B/PRRT1/GRID1/GLRA4/NTRK3/GRIN2A/LRRC4C/P2RY1/NRP2/SHISA6/SLC1A6/SLITRK1/CDH2/SLC8A3/CHRNA4/LRFN5/P2RX6/SLC8A1/LRRC4/ADRA1A/CNR1/ATP2B4/SLC6A1/GRIA1/KCNA2/SLC6A11/CDH10/LRFN2/SLC6A5/GSG1L/LRRTM1/CACNG7/NLGN1/HTR5A/GRIK5/ADCY8/SLC6A4/GHSR/FXYD6/CADM3/LRRTM3/SHISA9/GRID2/GPM6A/SLITRK3/CHRM2/GABRA5/NRXN1/GABRA1/SORCS3/…
BP	GO:0048857	neural nucleus development	-0.497336	-1.76597	0.0228026	ATP5PF/CALM1/BCL2/GNB4/KCNC1/MAOB/KIRREL3/ASCL1/SYPL2/KCNC2/INA/FOXP2/CKB/PHOX2A/PLP1/PHOX2B
BP	GO:0006936	muscle contraction	-0.497813	-2.25026	0.00951053	P2RX1/CALM1/SCN4B/GDNF/NKX2-5/SRF/GALR2/HDAC4/ACTC1/SSPN/TLN1/PDE4D/KCNJ12/VCL/EDN3/LTB4R/CHRM3/KCNE4/SCN5A/HTR2B/KCND3/DSC2/ACE2/DSP/MYH2/GUCY1A1/NMUR1/ATP8A2/TMOD2/GAMT/MYL6/CACNA2D1/SLMAP/HTR7/KCNIP2/TACR1/ITGA1/GJA1/GPER1/ACTA1/KCNB2/EHD3/SLC8A3/TNNT3/ADRB2/PRKG1/CHRNB4/P2RX6/MYOM2/CAV1/PTGER3/SLC8A1/MLN/TRIM63/RGS2/STAC/CHGA/SGCD/ADRA1A/RYR2/KCNH2/GSTM2/SCN2B/KIT/ATP2B4/EDN2/LMOD3/CACNA1C/DM…
BP	GO:0099601	regulation of neurotransmitter receptor activity	-0.500186	-1.82844	0.015196	NPTXR/RGS9/GRIA3/CACNG2/CCL2/GRIN2A/PSCA/SHISA6/ADRB2/CRHBP/NPTX2/GRIA1/LYNX1/GRIA4/DLG2/GSG1L/CACNG7/NLGN1/RELN/SHISA9/ACTN2/SLURP1/GRIA2/NEFL/NPTX1/ARC
BP	GO:0003012	muscle system process	-0.500585	-2.30769	0.00951053	P2RX1/CALM1/SCN4B/ERRFI1/GDNF/NKX2-5/SRF/GALR2/HDAC4/ACTC1/SSPN/TLN1/IGFBP5/KLF4/PDE4D/KCNJ12/VCL/EDN3/LTB4R/CHRM3/KCNE4/SCN5A/HTR2B/KCND3/DSC2/ACE2/CAMK2G/DSP/PDE9A/MYH2/TIAM1/GUCY1A1/NMUR1/ATP8A2/MSTN/TMOD2/MLIP/GAMT/MYL6/CACNA2D1/SLMAP/CAMK2B/HTR7/KCNIP2/GATA5/P2RY1/TACR1/MYOZ1/ITGA1/GJA1/GPER1/GSN/ACTA1/KCNB2/EHD3/SLC8A3/TNNT3/ADRB2/SORBS2/PRKG1/CHRNB4/P2RX6/MYOM2/CAV1/SLN/PTGER3/SLC8A1/MLN/T…
MF	GO:0004601	peroxidase activity	-0.502152	-1.70687	0.0387865	LTC4S/DUOX1/HBA1/HBQ1/HBD/HBZ/TPO/PTGS1/HBA2/GSTA1/GSTM2/GPX6/GPX3/HBG1/HBB/HBM
BP	GO:0017001	antibiotic catabolic process	-0.502805	-1.75155	0.0276565	DUOX1/HBA1/AKR1B10/HBQ1/ALDH3B2/HBD/PCK1/HBZ/SNCA/TPO/HBA2/SULT1C4/UGT1A1/GPX3/SULT2A1/HBG1/HBB/HBM/APOA4/ADH7/MT3
BP	GO:0090257	regulation of muscle system process	-0.503223	-2.18241	0.00951053	P2RX1/CALM1/ERRFI1/NKX2-5/SRF/HDAC4/IGFBP5/KLF4/PDE4D/CHRM3/SCN5A/DSC2/ACE2/CAMK2G/DSP/PDE9A/FGF13/GUCY1A1/MSTN/MLIP/CAMK2B/GATA5/TACR1/GPER1/KCNB2/EHD3/SLC8A3/TNNT3/ADRB2/PRKG1/CHRNB4/CAV1/SLN/SLC8A1/TRIM63/RGS2/CHGA/ADRA1A/RYR2/GSTM2/KIT/ATP2B4/EDN2/FBXO32/CACNA1C/RGS4/DMPK/PDE5A/MYL3/FLNA/TNNI3K/NOS1/NR4A3/CASQ1/DMD/TPM1/CHRNA3/PPP1R12B/GHSR/ANK2/MYOCD/SGCA/KCNMA1/PI16/AKAP6/NEUROG1/MYL9/TACR2…
MF	GO:0044325	ion channel binding	-0.504412	-2.01507	0.00951053	CALM1/KCNIP3/SCN4B/RIMS3/ACTN1/PDE4D/LRRC55/KCNE4/PKD1/SCN5A/KCND3/PRNP/KCNAB1/LRRK2/KCNC1/FGF13/HAP1/RIMS1/KCNIP2/PKD2/BAG2/KCNH5/RIMS4/CAV1/ABCC9/SLC8A1/STAC/ABCC8/RYR2/CASR/LRRC38/FLNA/NOS1/FXYD1/KCNC2/ANK2/AKAP6/FHL1/PIRT/ACTN2/KCNB1/LRRC52/DPP10/KCNE2
CC	GO:0060076	excitatory synapse	-0.504684	-1.71548	0.0387865	SYT11/GRIA3/NLGN4Y/SHISA6/SLC17A8/SLC17A7/P2RX6/LRRC4/CNTN6/LRRTM1/NLGN1/ADCY8/CADM3/GRID2/UNC13C/IGSF11/GRIA2
BP	GO:0030239	myofibril assembly	-0.506072	-1.84718	0.0151536	PDGFRA/MYPN/MEF2C/MEF2A/OBSL1/MYL2/NKX2-5/SRF/ACTC1/MYLK3/CSRP2/TMOD2/CAPN9/FHOD3/MYOZ1/ACTA1/TNNT3/MYOM2/LMOD3/CSRP1/CASQ1/TPM1/TMOD1/CFL2/KLHL41/SYNPO2L/MYOM1/LMOD1/MYOZ2/ACTN2/PGM5/CASQ2/MYH11/LDB3
BP	GO:0006939	smooth muscle contraction	-0.506441	-1.96961	0.00951053	P2RX1/GDNF/SRF/PDE4D/EDN3/CHRM3/HTR2B/GUCY1A1/NMUR1/HTR7/TACR1/GPER1/KCNB2/ADRB2/PRKG1/CHRNB4/CAV1/PTGER3/SLC8A1/MLN/RGS2/ADRA1A/KIT/ATP2B4/EDN2/ACTA2/SMTN/CHRNA3/P2RX2/GHSR/MYOCD/KCNMA1/NEUROG1/MYLK/TACR2/CNN1/ATP1A2/GHRL/MYH11/SPX/CHRM2/NPY2R
CC	GO:0043204	perikaryon	-0.508211	-2.04931	0.00951053	GJC2/PDE9A/OLFM1/SLC4A10/KCNAB1/LRRK2/PTPRS/ADCYAP1/GLRA4/DRP2/NDN/ITGA1/CPNE6/KCNB2/SLC17A8/SLC8A3/TTLL7/CRHBP/ITGA8/ASTN1/CACNA1C/MAP1B/KCNA2/RBFOX3/PTPRN/CRYAB/HTR5A/GRIK5/KCNC2/CNGA3/TMEM100/NEUROG1/SLC8A2/GRIK2/GRIK3/KCNB1/PENK/PCSK2/VIP/NGB/SLC5A7/KCNA1
CC	GO:0099240	intrinsic component of synaptic membrane	-0.508414	-2.10867	0.00951053	EPHA4/EFNB3/HTR3A/GABRB2/CHRM3/CLSTN2/SYT6/KCND3/SYT11/PTPRS/KCNC1/DCC/CACNG2/HTR1B/PRRT1/GRID1/GLRA4/NTRK3/GRIN2A/LRRC4C/P2RY1/NRP2/SHISA6/SLC1A6/SLITRK1/CDH2/SLC8A3/CHRNA4/LRFN5/P2RX6/SLC8A1/LRRC4/ADRA1A/CNR1/ATP2B4/SLC6A1/CNTN6/GRIA1/KCNA2/NTNG1/SLC6A11/CDH10/CNTN2/LRFN2/SLC6A5/GSG1L/LRRTM1/CACNG7/NLGN1/HTR5A/GRIK5/ADCY8/CPLX3/SLC6A4/GHSR/FXYD6/CNTN1/CADM3/LRRTM3/SHISA9/GRID2/GPM6A/SLITRK3/CHR…
BP	GO:1990089	response to nerve growth factor	-0.50868	-1.74093	0.032152	NTRK2/RAP1A/NGF/KCNC1/NTRK3/TMEM108/WASF1/MAGI2/MAPT/PTN/KCNC2/STMN2/TAC1/SH3GL2
BP	GO:0098900	regulation of action potential	-0.509352	-1.72363	0.0387865	SCN5A/DSC2/DSP/FGF13/CACNA2D1/SLMAP/CD36/CAV1/ADRA1A/RYR2/CNR1/CACNA1C/FLNA/MTNR1B/ANK2/KCNB1/TAC1/CTNNA3
CC	GO:0005771	multivesicular body	-0.510001	-1.74179	0.0342237	ZP2/LRRK2/SFTPD/CRHR1/NSG1/GJA1/CD300LG/CRHR1/SLC17A8/CRHBP/PGA3/SLC2A4/LRAT/NSG2/PGA5/PGA4
BP	GO:0035637	multicellular organismal signaling	-0.51161	-2.1802	0.00951053	KCNIP1/MAG/CACNB4/SCN3A/RYR1/P2RX1/CALM1/NPR2/KCNIP3/SCN4B/NTRK2/NKX2-5/PDE4D/GPR88/KCNJ12/KCNE4/SCN5A/KCND3/DSC2/ACE2/DSP/ATP1A3/ITPR1/CACNG2/SCN9A/NTRK3/CACNA2D1/KCNIP2/SCN11A/GJA1/GPER1/NPR1/EHD3/SLC8A3/KCNIP4/FXYD4/CHRNB4/JAM3/AVPR1A/AVP/CAV1/ABCC9/SLC8A1/RYR2/KCNH2/TRPC1/SCN2B/ATP2B4/CACNA1C/DMPK/CACNA2D3/KCNK3/KCNN2/KCNA2/GJC1/FLNA/NFASC/MTNR1B/TNNI3K/NOS1/ATP1B2/CASQ1/FXYD1/NPPC/CACNG7/CAC…
CC	GO:0016529	sarcoplasmic reticulum	-0.51179	-1.86805	0.0123237	CAMK2G/ITPR1/JPH3/P3H2/CMYA5/CACNA2D1/CAMK2B/JPH4/DHRS7C/SLN/MRVI1/SGCD/RYR2/GSTM2/DMPK/NOS1/CASQ1/JPH2/AKAP6/SLC2A4/KLHL41/RYR3/CASQ2/PLN
CC	GO:0098889	intrinsic component of presynaptic membrane	-0.512413	-1.91124	0.00951053	P2RX1/RGS7BP/KCNA3/ADAM23/EPHA4/EFNB3/HTR3A/CHRM3/SYT11/PTPRS/KCNC1/HTR1B/P2RY1/SLC1A6/CDH2/CHRNA4/ADRA1A/CNR1/ATP2B4/SLC6A1/CNTN6/KCNA2/NTNG1/SLC6A11/CDH10/SLC6A5/GRIK5/ADCY8/CPLX3/SLC6A4/FXYD6/CNTN1/CADM3/GPM6A/CHRM2/GABRA5/NRXN1/KCNA1
CC	GO:0043292	contractile fiber	-0.514031	-2.23153	0.00951053	ACTN1/FHL5/BAG3/VCL/SCN5A/SLC4A1/DST/PPP1R12A/MYH2/TIMP4/CSRP2/PARVA/C10orf71/AHNAK/TMOD2/CMYA5/KAT2B/FHOD3/AHNAK2/ILK/PDLIM7/SYNE1/KLHL40/PDLIM4/MYOZ1/GJA1/MYZAP/ACTA1/TNNT3/SORBS2/MYOM2/ABCC9/SLC8A1/TRIM63/FBP2/ADRA1A/XIRP2/RYR2/ATP2B4/PALLD/FBXO32/LMOD3/CACNA1C/SYNC/KCNN2/MYL3/FLNA/ACTA2/LRRC10/SVIL/NOS1/CSRP1/CASQ1/FERMT2/ARHGEF25/ITGB1BP2/DMD/CRYAB/TPM1/TMOD1/CALD1/PDLIM3/FBXL22/PPP1R12B/JPH…
CC	GO:0030315	T-tubule	-0.514292	-1.76014	0.0297893	SCN5A/AHNAK/AHNAK2/CACNA2D1/SLC8A1/STAC/ADRA1A/ATP2B4/CACNA1C/NOS1/CASQ1/FXYD1/CACNG7/CACNB2/ANK2/AKAP6/SLC2A4/ATP1A2
BP	GO:0001508	action potential	-0.514712	-2.06504	0.00951053	SCN3A/KCNJ8/P2RX1/SCN4B/NTRK2/GJD2/GPR88/KCNE4/SCN5A/KCND3/DSC2/DSP/HCN2/FGF13/SCN9A/NTRK3/CACNA2D1/SLMAP/KCNIP2/SCN11A/GJA1/GPER1/CD36/CHRNA4/CHRNB4/CAV1/SLC8A1/ADRA1A/RYR2/KCNH2/CNR1/SCN2B/CACNA1C/KCNN2/KCNA2/GJC1/FLNA/MTNR1B/CACNA1H/DMD/CACNB2/ANK2/KCNMB2/KCNA5/AKAP6/GRIK2/KCNB1/ATP1A2/SCN7A/TAC1/KCNE2/CTNNA3/KCNA1
BP	GO:1901016	regulation of potassium ion transmembrane transporter activity	-0.516183	-1.79315	0.0150011	LRRC55/KCNE4/KCNAB1/KCNC1/KCNIP2/CAV1/LRRC38/MTNR1B/ATP1B2/KCNC2/ANK2/AKAP6/FHL1/ACTN2/LRRC52/CASQ2/KCNE2/KCNA1
CC	GO:0016528	sarcoplasm	-0.516673	-1.92155	0.00951053	CAMK2G/ITPR1/JPH3/P3H2/CMYA5/CACNA2D1/CAMK2B/JPH4/GSN/DHRS7C/SLC8A3/SLN/MRVI1/SGCD/RYR2/GSTM2/DMPK/NOS1/CASQ1/JPH2/AKAP6/SLC2A4/KLHL41/FLNC/RYR3/CASQ2/PLN
BP	GO:0006112	energy reserve metabolic process	-0.516994	-1.94814	0.00951053	IL6ST/PRKAG3/PPP1R3F/PPP1CB/CALM1/GYG1/GFPT2/POMC/KHK/LEPR/GNMT/KL/GCK/PID1/INS/PPP1R3G/PPP1R3A/C1QTNF2/MC4R/PPP1R3C/SORBS1/ESRRB/ADRB3/LEP/MT3/GYS2/PYGM/PPP1R1A/G6PC
CC	GO:0034705	potassium channel complex	-0.518311	-1.98686	0.00951053	LRRC55/KCNE4/KCND3/KCNAB1/KCNC1/HCN2/KCNJ1/KCNIP2/KCNQ4/GRIK1/KCNB2/KCNIP4/KCNA4/ABCC9/KCNQ5/ABCC8/HCN1/KCNH2/LRRC38/KCNA2/DLG2/GRIK5/KCNC2/KCNMB2/KCNMB1/KCNMA1/KCNA5/GRIK2/GRIK3/KCNB1/LRRC52/KCNJ16/DPP10/KCNE2/DPP6/KCNA1
CC	GO:0044449	contractile fiber part	-0.518918	-2.23723	0.00951053	ACTN1/FHL5/BAG3/VCL/SCN5A/SLC4A1/DST/PPP1R12A/MYH2/TIMP4/CSRP2/PARVA/C10orf71/AHNAK/TMOD2/CMYA5/KAT2B/FHOD3/AHNAK2/ILK/PDLIM7/SYNE1/KLHL40/PDLIM4/MYOZ1/MYZAP/ACTA1/TNNT3/SORBS2/MYOM2/ABCC9/SLC8A1/TRIM63/FBP2/ADRA1A/XIRP2/RYR2/ATP2B4/PALLD/FBXO32/LMOD3/CACNA1C/SYNC/KCNN2/MYL3/FLNA/ACTA2/LRRC10/SVIL/NOS1/CSRP1/CASQ1/FERMT2/ARHGEF25/ITGB1BP2/DMD/CRYAB/TPM1/TMOD1/PDLIM3/FBXL22/PPP1R12B/JPH2/ANK2/TPM2…
CC	GO:0030016	myofibril	-0.520175	-2.24496	0.00951053	ACTN1/FHL5/BAG3/VCL/SCN5A/SLC4A1/DST/PPP1R12A/MYH2/TIMP4/CSRP2/PARVA/C10orf71/AHNAK/TMOD2/CMYA5/KAT2B/FHOD3/AHNAK2/ILK/PDLIM7/SYNE1/KLHL40/PDLIM4/MYOZ1/MYZAP/ACTA1/TNNT3/SORBS2/MYOM2/ABCC9/SLC8A1/TRIM63/FBP2/ADRA1A/XIRP2/RYR2/ATP2B4/PALLD/FBXO32/LMOD3/CACNA1C/SYNC/KCNN2/MYL3/FLNA/LRRC10/SVIL/NOS1/CSRP1/CASQ1/FERMT2/ARHGEF25/ITGB1BP2/DMD/CRYAB/TPM1/TMOD1/CALD1/PDLIM3/FBXL22/PPP1R12B/JPH2/ANK2/TPM2…
CC	GO:0099634	postsynaptic specialization membrane	-0.520463	-2.01265	0.00951053	EFNB3/GABRB2/CHRM3/CLSTN2/KCND3/RGS9/TIAM1/PTPRS/DCC/CACNG2/GRID1/GLRA4/GRIN2A/LRRC4C/SHISA6/SLITRK1/CDH2/LRFN5/P2RX6/LRRC4/GRIA1/CDH10/DLG2/LRFN2/GSG1L/LRRTM1/CACNG7/NLGN1/HTR5A/GRIK5/LRRTM3/SHISA9/GRID2/CNKSR2/ACTN2/SLITRK3/ATP2B2/GABRA5/GABRA1/SORCS3/EPHA7/ARC
BP	GO:2001259	positive regulation of cation channel activity	-0.520896	-1.88542	0.00951053	LRRC55/RGS9/KCNC1/CACNG2/CCL2/HAP1/CACNA2D1/KCNIP2/PKD2/EHD3/ADRB2/STAC/GSTM2/LRRC38/FGF14/CASQ1/CACNB2/KCNC2/RELN/JPH2/ANK2/AKAP6/PIRT/ACTN2/LRRC52/KCNE2/ARC/KCNA1
CC	GO:0098685	Schaffer collateral - CA1 synapse	-0.521667	-1.95085	0.00951053	SYT11/NEFH/PTPRS/ITPR1/DCC/CACNG2/GABBR1/AKAP12/LRRC4C/SYN2/LRRC4/NTNG1/LRFN2/GSG1L/ADCY8/GHSR/INA/CAMK2A/DGKB/GHRL/NRXN1/NEFL/SH3GL2/EPHA7
BP	GO:0006937	regulation of muscle contraction	-0.522558	-2.16185	0.00951053	TACR1/GPER1/KCNB2/EHD3/SLC8A3/TNNT3/ADRB2/PRKG1/CHRNB4/CAV1/SLC8A1/RGS2/CHGA/ADRA1A/RYR2/GSTM2/KIT/EDN2/CACNA1C/DMPK/PDE5A/MYL3/FLNA/TNNI3K/NOS1/CASQ1/DMD/TPM1/CHRNA3/PPP1R12B/GHSR/ANK2/MYOCD/KCNMA1/MYL9/TACR2/CNN1/ATP1A2/GHRL/CASQ2/PLN/HSPB6/SPX/CHRM2/CTNNA3/NPY2R/KCNA1
CC	GO:0030017	sarcomere	-0.523685	-2.24091	0.00951053	ACTN1/FHL5/BAG3/SCN5A/SLC4A1/DST/PPP1R12A/MYH2/TIMP4/CSRP2/PARVA/C10orf71/TMOD2/CMYA5/KAT2B/FHOD3/AHNAK2/ILK/PDLIM7/SYNE1/KLHL40/PDLIM4/MYOZ1/MYZAP/ACTA1/TNNT3/SORBS2/MYOM2/ABCC9/SLC8A1/TRIM63/FBP2/ADRA1A/XIRP2/RYR2/ATP2B4/PALLD/FBXO32/LMOD3/CACNA1C/SYNC/KCNN2/MYL3/FLNA/LRRC10/NOS1/CSRP1/CASQ1/FERMT2/ARHGEF25/ITGB1BP2/DMD/CRYAB/TPM1/TMOD1/PDLIM3/FBXL22/PPP1R12B/JPH2/ANK2/TPM2/CFL2/NEXN/KCNA5/KY/D…
BP	GO:0086003	cardiac muscle cell contraction	-0.525203	-1.87767	0.00951053	PDE4D/KCNE4/SCN5A/KCND3/DSC2/DSP/CACNA2D1/GJA1/CAV1/SGCD/RYR2/KCNH2/SCN2B/CACNA1C/KCNN2/GJC1/FLNA/CACNB2/ANK2/KCNA5/ATP1A2/PLN/KCNE2/CTNNA3
CC	GO:0098878	neurotransmitter receptor complex	-0.527473	-1.80525	0.0150175	GRIA3/CACNG2/HTR3B/GRIN2A/SHISA6/GRIK1/GRIA1/GRIA4/DLG2/CACNG7/NLGN1/GRIK5/GRIK2/GRIK3/SHISA9/GRID2/GRIA2/OLFM3/VWC2
BP	GO:0061337	cardiac conduction	-0.528948	-2.1533	0.00951053	KCNIP1/CACNB4/RYR1/CALM1/NPR2/KCNIP3/SCN4B/NKX2-5/PDE4D/KCNJ12/KCNE4/SCN5A/KCND3/DSC2/ACE2/DSP/ATP1A3/ITPR1/CACNG2/CACNA2D1/KCNIP2/GJA1/NPR1/EHD3/SLC8A3/KCNIP4/FXYD4/CAV1/ABCC9/SLC8A1/RYR2/KCNH2/TRPC1/SCN2B/ATP2B4/CACNA1C/DMPK/CACNA2D3/KCNK3/KCNN2/GJC1/FLNA/TNNI3K/NOS1/ATP1B2/CASQ1/FXYD1/NPPC/CACNG7/CACNB2/ANK2/FXYD6/KCNA5/SLC8A2/RYR3/ATP2B3/ATP1A2/CASQ2/PLN/ATP2B2/KCNE2/CTNNA3
CC	GO:0008328	ionotropic glutamate receptor complex	-0.529136	-1.7986	0.0297586	GRIA3/CACNG2/GRIN2A/SHISA6/GRIK1/GRIA1/GRIA4/DLG2/CACNG7/NLGN1/GRIK5/GRIK2/GRIK3/SHISA9/GRID2/GRIA2/OLFM3/VWC2
CC	GO:0014704	intercalated disc	-0.529326	-1.79924	0.0297586	SCN4B/ACTN1/VCL/SCN5A/DSC2/DSP/FGF13/GJA1/CDH2/SLC8A1/GJC1/FXYD1/ANK2/KCNA5/DES/AKAP6/ATP1A2/PGM5/CTNNA3
MF	GO:0042805	actinin binding	-0.530341	-1.77119	0.032152	PDLIM7/PKD2/PDLIM4/MYOM2/XIRP2/PALLD/CACNA1C/KCNN2/LRRC10/CSRP1/PDLIM3/KCNA5/MYOM1/MYOT/TRPC5/SYNPO2/LDB3
CC	GO:0098839	postsynaptic density membrane	-0.531864	-1.94905	0.0123962	CHRM3/CLSTN2/RGS9/TIAM1/PTPRS/DCC/CACNG2/GRID1/GRIN2A/LRRC4C/SHISA6/SLITRK1/LRFN5/LRRC4/GRIA1/DLG2/LRFN2/GSG1L/CACNG7/GRIK5/LRRTM3/SHISA9/GRID2/CNKSR2/ACTN2/SLITRK3/ATP2B2/SORCS3/EPHA7/ARC
BP	GO:0086002	cardiac muscle cell action potential involved in contraction	-0.532784	-1.8196	0.0150011	KCNE4/SCN5A/KCND3/DSC2/DSP/CACNA2D1/GJA1/CAV1/RYR2/KCNH2/SCN2B/CACNA1C/KCNN2/GJC1/FLNA/CACNB2/ANK2/KCNA5/KCNE2/CTNNA3
BP	GO:0043266	regulation of potassium ion transport	-0.533689	-2.0392	0.00951053	EDN3/LRRC55/KCNE4/PRNP/KCNAB1/KCNC1/ADCYAP1/KCNIP2/GCK/WNK3/KCNIP4/CAV1/KCNH2/RGS4/KCNN2/LRRC38/FLNA/MTNR1B/NOS1/ATP1B2/KCNC2/ANK2/KCNMB1/KCNA5/AKAP6/FHL1/ACTN2/LRRC52/CASQ2/VIP/DPP10/KCNE2/DPP6/KCNA1
CC	GO:0098948	intrinsic component of postsynaptic specialization membrane	-0.537642	-1.98611	0.00951053	EFNB3/GABRB2/CHRM3/CLSTN2/KCND3/PTPRS/DCC/CACNG2/GRID1/GLRA4/GRIN2A/LRRC4C/SHISA6/SLITRK1/CDH2/LRFN5/P2RX6/LRRC4/GRIA1/CDH10/LRFN2/GSG1L/LRRTM1/CACNG7/NLGN1/HTR5A/GRIK5/LRRTM3/SHISA9/GRID2/SLITRK3/GABRA5/GABRA1/SORCS3/EPHA7
BP	GO:0002027	regulation of heart rate	-0.538679	-2.06494	0.00951053	ATP5PF/CALM1/SEMA3A/SCN4B/PDE4D/EDN3/KCNE4/SCN5A/KCND3/DSC2/DSP/RNLS/CACNA2D1/AVPR1A/CAV1/SLC8A1/ADRA1A/RYR2/KCNH2/SCN2B/EDN2/CACNA1C/RGS4/TNNI3K/DMD/CACNB2/TPM1/ANK2/BVES/KCNA5/AGTR2/POPDC2/CASQ2/PLN/SPX/TAC1/KCNE2/CTNNA3
MF	GO:0015459	potassium channel regulator activity	-0.539745	-1.84725	0.00951053	LRRC55/KCNE4/KCNAB1/KCNIP2/WNK3/ADRB2/KCNIP4/CAV1/ABCC9/LRRC38/FLNA/KCNMB2/KCNMB1/LRRC52/DPP10/KCNE2/DPP6
CC	GO:0031672	A band	-0.539978	-1.75784	0.0446503	DST/PPP1R12A/CMYA5/KAT2B/KLHL40/MYOM2/TRIM63/LMOD3/MYL3/CRYAB/PPP1R12B/ANK2/MYL7/KLHL41/MYOM1/SMPX
CC	GO:0099146	intrinsic component of postsynaptic density membrane	-0.540118	-1.8556	0.00951053	EFNB3/CHRM3/CLSTN2/PTPRS/DCC/CACNG2/GRID1/GRIN2A/LRRC4C/SHISA6/SLITRK1/LRFN5/LRRC4/GRIA1/LRFN2/GSG1L/CACNG7/GRIK5/LRRTM3/SHISA9/GRID2/SLITRK3/SORCS3/EPHA7
CC	GO:0099060	integral component of postsynaptic specialization membrane	-0.543616	-1.99212	0.00951053	EFNB3/GABRB2/CHRM3/CLSTN2/KCND3/PTPRS/DCC/CACNG2/GRID1/GLRA4/GRIN2A/LRRC4C/SHISA6/SLITRK1/CDH2/LRFN5/P2RX6/LRRC4/GRIA1/CDH10/LRFN2/GSG1L/LRRTM1/CACNG7/NLGN1/HTR5A/GRIK5/LRRTM3/SHISA9/GRID2/SLITRK3/GABRA5/GABRA1/SORCS3/EPHA7
BP	GO:0086091	regulation of heart rate by cardiac conduction	-0.546664	-1.77137	0.0401768	KCNE4/SCN5A/KCND3/DSC2/DSP/CACNA2D1/CAV1/KCNH2/SCN2B/CACNA1C/CACNB2/ANK2/KCNA5/KCNE2/CTNNA3
BP	GO:0043949	regulation of cAMP-mediated signaling	-0.547185	-1.84433	0.0177531	PDE4D/LPAR1/GNAI1/OR51E2/SCT/MRAP/CRHR1/ADCYAP1/CRHR1/GPR62/PDE2A/RASD2/PDE3A/RGS2/ATP2B4/SCTR/NOS1/ADCYAP1R1/NPY2R/GIP
BP	GO:0048662	negative regulation of smooth muscle cell proliferation	-0.547711	-1.82448	0.0225369	APOD/ANG/CDKN1A/PDCD4/MEF2C/NDRG2/IL12A/IL10/IGFBP5/KLF4/ILK/GPER1/NPR1/PRKG1/NDRG4/VIPR2/OGN/TPM1/MYOCD/ADIPOQ/NPR3/CNN1/VIP
CC	GO:0099061	integral component of postsynaptic density membrane	-0.549045	-1.86627	0.0122296	EFNB3/CHRM3/CLSTN2/PTPRS/DCC/CACNG2/GRID1/GRIN2A/LRRC4C/SHISA6/SLITRK1/LRFN5/LRRC4/GRIA1/LRFN2/GSG1L/CACNG7/GRIK5/LRRTM3/SHISA9/GRID2/SLITRK3/SORCS3/EPHA7
CC	GO:0042383	sarcolemma	-0.549878	-2.22516	0.00951053	VCL/SCN5A/KCND3/PDE9A/LAMA2/AHNAK/MLIP/AHNAK2/CACNA2D1/SLMAP/SNTG2/CDH2/SLC8A3/SGCE/SGCZ/CAV1/ABCC9/SLC8A1/STAC/ABCC8/SLC2A5/SGCD/ADRA1A/RYR2/ANXA1/ATP2B4/CACNA1C/SYNC/DTNA/NOS1/CASQ1/FXYD1/CACNG7/DMD/CACNB2/ANK2/SGCA/BVES/DES/AKAP6/SLC2A4/SLC27A6/MYOT/FLNC/POPDC2/RYR3/KCNB1/ALOX12/ATP1A2/PGM5/SYNM/SGCG
BP	GO:0043268	positive regulation of potassium ion transport	-0.5506	-1.82992	0.0198975	EDN3/LRRC55/KCNC1/KCNIP2/WNK3/KCNH2/LRRC38/FLNA/ATP1B2/KCNC2/ANK2/KCNMB1/AKAP6/FHL1/ACTN2/LRRC52/KCNA1
BP	GO:0050805	negative regulation of synaptic transmission	-0.554638	-2.01615	0.00951053	RAP1A/SYT11/LRRK2/GNAI1/HTR1B/SNCA/PRKN/NPY5R/SLC6A1/GRIA1/MAPT/ADCY8/SLC6A4/ADIPOQ/GRIK2/GRIK3/GRID2/KCNB1/SYT4/BCHE/SORCS3/ARC/NPY2R
CC	GO:0031674	I band	-0.556601	-2.27095	0.00951053	ACTN1/FHL5/BAG3/SCN5A/SLC4A1/DST/PPP1R12A/CSRP2/PARVA/C10orf71/KAT2B/FHOD3/AHNAK2/PDLIM7/KLHL40/PDLIM4/MYOZ1/MYZAP/SORBS2/MYOM2/SLC8A1/TRIM63/FBP2/ADRA1A/XIRP2/RYR2/ATP2B4/PALLD/FBXO32/CACNA1C/SYNC/KCNN2/MYL3/FLNA/NOS1/CSRP1/CASQ1/FERMT2/ITGB1BP2/DMD/CRYAB/PDLIM3/FBXL22/PPP1R12B/JPH2/ANK2/CFL2/NEXN/KCNA5/KY/DES/SYNPO2L/MYL9/MYOM1/MYOT/FLNC/MYOZ2/SYNPO2/RYR3/ACTN2/PGM5/CASQ2/LDB3
BP	GO:0086009	membrane repolarization	-0.558726	-1.86117	0.0199779	KCNJ8/SCN4B/KCNE4/SCN5A/KCND3/CACNA2D1/KCNIP2/GJA1/CAV1/KCNH2/KCNN2/FLNA/ATP1B2/ANK2/KCNA5/AKAP6/ATP1A2/CASQ2/KCNE2
BP	GO:0086001	cardiac muscle cell action potential	-0.559581	-2.02544	0.00951053	KCNE4/SCN5A/KCND3/DSC2/DSP/HCN2/FGF13/CACNA2D1/SLMAP/KCNIP2/GJA1/CAV1/SLC8A1/RYR2/KCNH2/SCN2B/CACNA1C/KCNN2/GJC1/FLNA/DMD/CACNB2/ANK2/KCNA5/ATP1A2/KCNE2/CTNNA3
BP	GO:0098815	modulation of excitatory postsynaptic potential	-0.560572	-1.83334	0.0292183	NLGN2/BAIAP2/NLGN4X/DLG4/RIMS2/LRRK2/RIMS1/TMEM108/ADRB2/RGS4/CUX2/NLGN1/RELN/IGSF11/NRXN1/NPY2R
BP	GO:1901379	regulation of potassium ion transmembrane transport	-0.560929	-2.07965	0.00951053	EDN3/LRRC55/KCNE4/PRNP/KCNAB1/KCNC1/KCNIP2/WNK3/KCNIP4/CAV1/KCNH2/RGS4/KCNN2/LRRC38/FLNA/MTNR1B/ATP1B2/KCNC2/ANK2/KCNMB1/AKAP6/FHL1/ACTN2/LRRC52/CASQ2/DPP10/KCNE2/DPP6/KCNA1
MF	GO:0051393	alpha-actinin binding	-0.564059	-1.81682	0.0291295	PDLIM7/PKD2/PDLIM4/MYOM2/XIRP2/PALLD/CACNA1C/KCNN2/LRRC10/PDLIM3/KCNA5/MYOM1/MYOT/SYNPO2/LDB3
MF	GO:0008307	structural constituent of muscle	-0.569911	-1.90335	0.0150175	SORBS2/MYOM2/MYL3/CSRP1/SMTN/DMD/TPM1/PDLIM3/TPM2/NEXN/MYL9/MYOM1/MYOT/ACTN2/MYH11/SYNM
BP	GO:0086010	membrane depolarization during action potential	-0.569995	-1.82441	0.0268905	SCN3A/SCN4B/SCN5A/HCN2/SCN9A/CACNA2D1/SLMAP/SCN11A/SLC8A1/KCNH2/SCN2B/CACNA1C/CACNA1H/CACNB2/ANK2/ATP1A2/SCN7A
CC	GO:0030018	Z disc	-0.572464	-2.3084	0.00951053	ACTN1/FHL5/BAG3/SCN5A/SLC4A1/DST/PPP1R12A/CSRP2/PARVA/C10orf71/FHOD3/AHNAK2/PDLIM7/PDLIM4/MYOZ1/MYZAP/SORBS2/MYOM2/SLC8A1/TRIM63/FBP2/ADRA1A/XIRP2/RYR2/ATP2B4/PALLD/FBXO32/CACNA1C/SYNC/KCNN2/FLNA/NOS1/CSRP1/CASQ1/ITGB1BP2/DMD/CRYAB/PDLIM3/FBXL22/PPP1R12B/JPH2/ANK2/CFL2/NEXN/KCNA5/KY/DES/SYNPO2L/MYL9/MYOM1/MYOT/FLNC/MYOZ2/SYNPO2/RYR3/ACTN2/PGM5/CASQ2/LDB3
BP	GO:0086065	cell communication involved in cardiac conduction	-0.576855	-1.9884	0.00951053	CALM1/SCN4B/PDE4D/SCN5A/DSC2/DSP/ATP1A3/CACNA2D1/GJA1/CAV1/SLC8A1/RYR2/CACNA1C/KCNN2/GJC1/FLNA/TNNI3K/ATP1B2/CACNB2/ANK2/KCNA5/ATP1A2/CASQ2/CTNNA3
BP	GO:0140115	export across plasma membrane	-0.57813	-1.82101	0.0441845	KCNE4/KCND3/ATP1A3/KCNIP2/KCNT2/SLC8A1/KCNH2/ATP1B2/FXYD1/KCNA5/ATP1A2/KCNE2/ATP4A/ATP4B
BP	GO:1901021	positive regulation of calcium ion transmembrane transporter activity	-0.579608	-1.87813	0.0174136	HAP1/CACNA2D1/PKD2/EHD3/STAC/RYR2/GSTM2/FGF14/CASQ1/HSPA2/CACNB2/JPH2/ANK2/AKAP6/KCNE2
BP	GO:0070296	sarcoplasmic reticulum calcium ion transport	-0.580392	-1.8894	0.0174136	DHRS7C/SLN/SLC8A1/RYR2/GSTM2/CACNA1C/CASQ1/DMD/ANK2/AKAP6/ATP1A2/CASQ2/PLN
BP	GO:0055078	sodium ion homeostasis	-0.580584	-1.98702	0.00951053	CYP11B2/NPR1/AVPR1A/AVP/SLC8A1/SCNN1B/SCNN1G/CYP4F2/C7/ATP1B2/AGTR1/AGTR2/SLC12A1/ATP1A2/SCN7A/SPX/TAC1/ATP4A/TFAP2B/ATP4B
CC	GO:0033017	sarcoplasmic reticulum membrane	-0.581802	-1.89399	0.0174136	CAMK2G/JPH3/CAMK2B/JPH4/DHRS7C/SLN/RYR2/DMPK/NOS1/CASQ1/JPH2/AKAP6/KLHL41/RYR3/CASQ2/PLN
BP	GO:0006940	regulation of smooth muscle contraction	-0.582423	-2.0501	0.00951053	TACR1/GPER1/KCNB2/ADRB2/PRKG1/CHRNB4/CAV1/RGS2/ADRA1A/KIT/EDN2/CHRNA3/GHSR/MYOCD/KCNMA1/TACR2/CNN1/ATP1A2/GHRL/SPX/CHRM2/NPY2R
BP	GO:1903779	regulation of cardiac conduction	-0.588424	-2.12984	0.00951053	RYR1/CALM1/NPR2/NKX2-5/PDE4D/ACE2/ATP1A3/ITPR1/NPR1/EHD3/SLC8A3/FXYD4/CAV1/ABCC9/SLC8A1/RYR2/TRPC1/ATP2B4/DMPK/FLNA/TNNI3K/NOS1/ATP1B2/CASQ1/FXYD1/NPPC/ANK2/FXYD6/SLC8A2/RYR3/ATP2B3/ATP1A2/CASQ2/ATP2B2
BP	GO:0045987	positive regulation of smooth muscle contraction	-0.591917	-1.83155	0.0357722	GPER1/ADRA1A/KIT/EDN2/GHSR/MYOCD/TACR2/GHRL/SPX/NPY2R
BP	GO:1901018	positive regulation of potassium ion transmembrane transporter activity	-0.595965	-1.73956	0.0487359	GALR2/LRRC55/KCNC1/KCNIP2/LRRC38/ATP1B2/KCNC2/ANK2/AKAP6/ACTN2/LRRC52/KCNA1
BP	GO:1901381	positive regulation of potassium ion transmembrane transport	-0.601991	-1.93899	0.0119369	EDN3/LRRC55/KCNC1/KCNIP2/WNK3/KCNH2/LRRC38/FLNA/ATP1B2/KCNC2/ANK2/KCNMB1/AKAP6/ACTN2/LRRC52/KCNA1
MF	GO:0005184	neuropeptide hormone activity	-0.605514	-1.81339	0.0328164	PNOC/QRFP/ADCYAP1/CALCB/AVP/GRP/PYY/PENK/SPX/NPY/VIP/CARTPT/PPY
BP	GO:0032094	response to food	-0.607352	-1.96803	0.00951053	GHSR/LEP/MT3/GHRL/SPX/NPY/CARTPT/G6PC/GAST
BP	GO:0099560	synaptic membrane adhesion	-0.608463	-1.80339	0.0330315	MDGA1/PTPRD/PTPRS/IGSF9B/LRRC4C/SLITRK1/LRFN5/LRRC4/NTNG1/SPARCL1/NLGN1/SLITRK2/SLITRK3/NRXN1
BP	GO:0043950	positive regulation of cAMP-mediated signaling	-0.610176	-1.76087	0.045696	CALM1/OR51E2/SCT/MRAP/CRHR1/ADCYAP1/CRHR1/GPR62/SCTR/NOS1/ADCYAP1R1/GIP
CC	GO:0034706	sodium channel complex	-0.610852	-1.76282	0.045696	SCN3A/SCN4B/SCN5A/SCN9A/SCN11A/GRIK1/SCNN1B/SCN2B/SCNN1G/GRIK5/GRIK2/GRIK3/SCN7A
BP	GO:0045822	negative regulation of heart contraction	-0.613234	-1.78996	0.0328164	PDE4D/RNLS/IL2/ADRA1A/PDE5A/AGTR2/ATP1A2/PLN/SPX/TAC1
BP	GO:0086064	cell communication by electrical coupling involved in cardiac conduction	-0.617988	-1.80384	0.030764	CALM1/PDE4D/ATP1A3/GJA1/CAV1/SLC8A1/RYR2/CACNA1C/GJC1/ATP1B2/ATP1A2
BP	GO:0002026	regulation of the force of heart contraction	-0.619092	-1.85406	0.0217538	CAV1/SLC8A1/CHGA/ADRA1A/RYR2/ATP2B4/EDN2/MYL3/NOS1/ATP1A2/PLN
BP	GO:0042759	long-chain fatty acid biosynthetic process	-0.622867	-1.89821	0.0242049	PTGS2/QKI/CYP1A1/LTC4S/CYP2C9/ALOX12B/HPGD/ACOT12/CYP3A4/ALOX15B/CYP1A2/ASAH2/ALOX12/PLP1
CC	GO:0097386	glial cell projection	-0.622882	-1.79754	0.0355363	GJB2/SLC17A8/MAPT/NFASC/CNGA3/MT3/SCN7A/SYT4
BP	GO:0048485	sympathetic nervous system development	-0.623176	-1.75795	0.045696	NRP2/TP63/ASCL1/GFRA3/HAND2/PHOX2A/PHOX2B/TFAP2B
BP	GO:0071294	cellular response to zinc ion	-0.624742	-1.7805	0.0375849	ZNF658/MT1E/MT1G/MT1X/GLRA2/MT1A/MT1M/KCNK3/MT4/MT1B/MT3
BP	GO:0051589	negative regulation of neurotransmitter transport	-0.626748	-1.78621	0.0375849	RAP1A/SYT11/HTR1B/MAOB/SNCA/RGS2/PRKN/RGS4/NOS1/GPM6B/SYT4
BP	GO:0010882	regulation of cardiac muscle contraction by calcium ion signaling	-0.631342	-1.85857	0.0217538	SLC8A1/RYR2/GSTM2/CACNA1C/DMD/ANK2/ATP1A2/CASQ2/PLN
BP	GO:0032104	regulation of response to extracellular stimulus	-0.632193	-1.86107	0.0217538	KANK2/GHSR/LEP/MT3/GHRL/SPX/NPY/CARTPT
BP	GO:0032107	regulation of response to nutrient levels	-0.632193	-1.86107	0.0217538	KANK2/GHSR/LEP/MT3/GHRL/SPX/NPY/CARTPT
BP	GO:1901380	negative regulation of potassium ion transmembrane transport	-0.634015	-1.85062	0.0242049	KCNE4/KCNAB1/CAV1/KCNH2/RGS4/MTNR1B/ACTN2/CASQ2/KCNE2
BP	GO:0043267	negative regulation of potassium ion transport	-0.634897	-1.98222	0.00951053	KCNE4/KCNAB1/ADCYAP1/CAV1/KCNH2/RGS4/MTNR1B/NOS1/ACTN2/CASQ2/VIP/KCNE2
BP	GO:1903514	release of sequestered calcium ion into cytosol by endoplasmic reticulum	-0.635431	-2.0015	0.00951053	DHRS7C/SLC8A1/RYR2/GSTM2/CACNA1C/CASQ1/DMD/ANK2/AKAP6/ATP1A2/CASQ2/PLN
BP	GO:0070268	cornification	-0.635841	-2.49882	0.00951053	KRT79/KRT38/DSC2/DSP/KRT16/KRT20/DSG4/KRT73/EVPL/TMEM79/DSG3/KRT6A/SPRR1B/KRT28/TGM5/PPL/KRT6B/KRT33A/SPRR2D/SPINK6/KRT76/DSC3/LOR/KRT74/RPTN/KRT15/KRT5/PKP1/SPRR2E/KRT77/DSC1/SPRR2A/LCE1A/KRT2/KRT34/TGM1/KRT6C/KRT33B/SPINK5/KLK13/KRT13/IVL/LCE3D/KLK12/SPRR3/KRT78/SPRR2B/CSTA/KRT4/FLG/SPRR1A/KRT3/DSG1/KRT31/KRT37/KRT32/KRT1/KRT35
BP	GO:0007620	copulation	-0.636729	-1.77673	0.045696	P2RX1/EDDM3A/DDO/P2RY1/AVPR1A/AVP/CNR1/SLC6A4/TAC1/VIP
CC	GO:0098945	intrinsic component of presynaptic active zone membrane	-0.640605	-1.76217	0.0474652	P2RX1/SYT11/P2RY1/CDH2/ATP2B4/NTNG1/CDH10/CPLX3/GPM6A/NRXN1
MF	GO:0004364	glutathione transferase activity	-0.643572	-1.89457	0.017225	GSTA4/GSTM3/GSTM1/LTC4S/GSTT2B/HPGDS/GSTA1/GSTM2/GSTM5/GSTA5/GSTA2/GSTA3
BP	GO:0045104	intermediate filament cytoskeleton organization	-0.644916	-2.19215	0.00951053	DSP/NEFH/DST/KRT16/KRT20/BFSP2/EVPL/ATP8A2/PPL/KRT74/PKP1/KRT2/KRT6C/EVPLL/DES/INA/PRPH/KRT3/NEFM/SYNM/NEFL
BP	GO:1901017	negative regulation of potassium ion transmembrane transporter activity	-0.645805	-1.80206	0.0327982	KCNE4/KCNAB1/CAV1/MTNR1B/ACTN2/CASQ2/KCNE2
BP	GO:0018149	peptide cross-linking	-0.648662	-2.28326	0.00951053	DSP/NDNF/EVPL/LCE1C/LCE1B/DCN/SPRR4/SPRR1B/ANXA1/TGM5/F13A1/SPRR2D/LOR/SPRR2E/SPRR2A/LCE1A/TGM7/KRT2/TGM1/LCE3A/IVL/LCE3D/SPRR3/SPRR2B/CSTA/LCE3E/FLG/SPRR1A/SPOCK3/TGM3/LCE3C/KRT1
BP	GO:0047497	mitochondrion transport along microtubule	-0.648706	-1.84879	0.0194101	FEZ1/UCHL1/HAP1/MGARP/WASF1/MAPT/MAP1B/NEFL
BP	GO:0045103	intermediate filament-based process	-0.652228	-2.22753	0.00951053	DSP/NEFH/DST/KRT16/KRT20/BFSP2/EVPL/ATP8A2/SYNC/PPL/KRT74/PKP1/KRT2/KRT6C/EVPLL/DES/INA/PRPH/KRT3/NEFM/SYNM/NEFL
BP	GO:0014808	release of sequestered calcium ion into cytosol by sarcoplasmic reticulum	-0.652805	-2.03813	0.00951053	DHRS7C/SLC8A1/RYR2/GSTM2/CACNA1C/CASQ1/DMD/ANK2/AKAP6/ATP1A2/CASQ2/PLN
BP	GO:0090075	relaxation of muscle	-0.666661	-2.03168	0.00951053	PDE4D/GUCY1A1/P2RY1/PRKG1/SLN/SLC8A1/RGS2/CHGA/GSTM2/PDE5A/KCNMA1/NEUROG1/ATP1A2/PLN
BP	GO:0060314	regulation of ryanodine-sensitive calcium-release channel activity	-0.670529	-1.98734	0.0118457	CALM1/PDE4D/JPH3/PKD2/JPH4/GSTM2/NOS1/DMD/JPH2/AKAP6/CASQ2/PLN
BP	GO:1901685	glutathione derivative metabolic process	-0.674854	-1.90373	0.0171254	GSTA4/GSTM3/GSTM1/GSTT2B/HPGDS/GSTA1/GSTM2/GSTM5/GSTA2/GSTA3
BP	GO:1901687	glutathione derivative biosynthetic process	-0.674854	-1.90373	0.0171254	GSTA4/GSTM3/GSTM1/GSTT2B/HPGDS/GSTA1/GSTM2/GSTM5/GSTA2/GSTA3
BP	GO:2000846	regulation of corticosteroid hormone secretion	-0.674856	-1.78034	0.046861	POMC/CRHR1/BMP6/CRHR1/AGTR1/AGTR2/GALR1/GHRL/TAC1
BP	GO:0006883	cellular sodium ion homeostasis	-0.674932	-1.80459	0.030764	ATP1A3/SLC8A1/C7/ATP1B2/AGTR2/ATP1A2/ATP4A/ATP4B
CC	GO:0001533	cornified envelope	-0.675349	-2.41822	0.00951053	DSC2/DSP/DSG4/EVPL/LCE1C/FLG2/LCE1B/HRNR/DSG3/SPRR4/SPRR1B/ANXA1/PPL/SPRR2D/DSC3/SCEL/LOR/RPTN/PKP1/SPRR2E/DSC1/SPRR2A/LCE1A/KRT2/TGM1/EVPLL/LCE3A/IVL/LCE3D/CNFN/SPRR3/SPRR2B/CSTA/LCE3E/FLG/SPRR1A/DSG1/LCE3C/KRT1
BP	GO:0010644	cell communication by electrical coupling	-0.675686	-2.05918	0.00951053	CALM1/PDE4D/GJC2/ATP1A3/GJA1/CAV1/SLC8A1/RYR2/CACNA1C/GJC1/ATP1B2/ATP1A2/CASQ2/KCNA1
BP	GO:0035930	corticosteroid hormone secretion	-0.685043	-1.83163	0.0264383	POMC/SELENOM/CRHR1/BMP6/CRHR1/AGTR1/AGTR2/GALR1/GHRL/TAC1
CC	GO:0016010	dystrophin-associated glycoprotein complex	-0.687879	-1.89221	0.014617	SGCB/SSPN/SNTG2/SGCE/SGCZ/SGCD/DMD/SGCA/PGM5/SGCG
CC	GO:0090665	glycoprotein complex	-0.687879	-1.89221	0.014617	SGCB/SSPN/SNTG2/SGCE/SGCZ/SGCD/DMD/SGCA/PGM5/SGCG
MF	GO:0005149	interleukin-1 receptor binding	-0.698662	-1.84315	0.0324244	IL1RN/IL1F10/IL1A/IL36B/IL36A/IL36RN
BP	GO:0032105	negative regulation of response to extracellular stimulus	-0.704002	-1.8253	0.0323733	KANK2/GHSR/LEP/SPX/CARTPT
BP	GO:0032108	negative regulation of response to nutrient levels	-0.704002	-1.8253	0.0323733	KANK2/GHSR/LEP/SPX/CARTPT
CC	GO:0043034	costamere	-0.70624	-1.94271	0.0118136	VCL/AHNAK/AHNAK2/ILK/SVIL/DMD/ANK2/FLNC/PGM5/SMPX/SYNM
BP	GO:0036376	sodium ion export across plasma membrane	-0.713866	-1.82043	0.0369469	ATP1A3/SLC8A1/ATP1B2/FXYD1/ATP1A2/ATP4A/ATP4B
BP	GO:0055119	relaxation of cardiac muscle	-0.721217	-1.90265	0.0262198	PDE4D/SLC8A1/RGS2/CHGA/GSTM2/PDE5A/ATP1A2/PLN
BP	GO:0010880	regulation of release of sequestered calcium ion into cytosol by sarcoplasmic reticulum	-0.72169	-2.18062	0.00951053	DHRS7C/SLC8A1/RYR2/GSTM2/CACNA1C/CASQ1/DMD/ANK2/AKAP6/ATP1A2/CASQ2/PLN
BP	GO:0019896	axonal transport of mitochondrion	-0.721691	-1.79845	0.0484214	FEZ1/UCHL1/HAP1/MGARP/MAPT/NEFL
MF	GO:0004953	icosanoid receptor activity	-0.722244	-1.8726	0.0262198	PTGDR/LTB4R2/PTGER2/LTB4R/HPGD/CYSLTR1/PTGDR2/PTGER3/PTGFR
BP	GO:0032096	negative regulation of response to food	-0.722985	-1.80168	0.0484214	NUCB2/BBS2/GHSR/LEP/SPX/CARTPT
BP	GO:0032099	negative regulation of appetite	-0.722985	-1.80168	0.0484214	NUCB2/BBS2/GHSR/LEP/SPX/CARTPT
BP	GO:0042753	positive regulation of circadian rhythm	-0.725691	-1.94031	0.0145174	RORA/MTNR1B/NLGN1/GHRL/NPY2R
CC	GO:0098845	postsynaptic endosome	-0.730824	-1.82121	0.0351126	NSG1/SH3GL3/PSD/ARC
BP	GO:0010273	detoxification of copper ion	-0.732423	-1.86775	0.0283346	MT1E/MT1G/MT1X/MT1A/MT1M/MT4/MT1B/MT3
BP	GO:1990169	stress response to copper ion	-0.732423	-1.86775	0.0283346	MT1E/MT1G/MT1X/MT1A/MT1M/MT4/MT1B/MT3
BP	GO:0071871	response to epinephrine	-0.732621	-1.93274	0.0193084	PDE4D/PKLR/RNLS/SNCA/RYR2/ATP2B4/ADIPOQ/PENK
BP	GO:0032095	regulation of response to food	-0.742023	-2.04115	0.00951053	GHSR/LEP/MT3/GHRL/SPX/NPY/CARTPT
CC	GO:0005614	interstitial matrix	-0.742393	-1.81422	0.0409988	ECM2/ADAMTSL4/TNC/NAV2/CCDC80/SMOC2/VIT/ABI3BP/VWC2
BP	GO:0030007	cellular potassium ion homeostasis	-0.753799	-1.87846	0.0264383	ATP1A3/ATP1B2/KCNMA1/ATP1A2/ATP4A/ATP4B
BP	GO:0086103	G protein-coupled receptor signaling pathway involved in heart process	-0.757976	-1.81656	0.0432446	PDE4D/CAV1/RGS2/CHGA/ATP2B4/NOS1/PLN
BP	GO:0003214	cardiac left ventricle morphogenesis	-0.760266	-1.93875	0.0193084	CPE/RYR2/NPY5R/FOXF1/TBX5/NPY2R
BP	GO:0015669	gas transport	-0.76065	-2.09238	0.00951053	MB/CA2/HBA1/HBQ1/HBD/HBZ/HBA2/RHAG/HBG1/HBB/HBM/NGB
BP	GO:0002087	regulation of respiratory gaseous exchange by neurological system process	-0.761766	-1.89832	0.0193084	PBX3/TSHZ3/TLX3/NLGN1/ATP1A2/PHOX2B
BP	GO:0070586	cell-cell adhesion involved in gastrulation	-0.763673	-1.83021	0.0369481	WNK1/IL10/MYADM/KLF4/IL1RN/ADIPOQ/APOA1
BP	GO:0008090	retrograde axonal transport	-0.764923	-2.078	0.00951053	DST/HAP1/MGARP/TMEM108/MAP1A/DLG2/KIF1A/KIF5A/NEFL
BP	GO:0043084	penile erection	-0.769684	-1.79312	0.0498585	P2RY1/AVPR1A/AVP/CNR1/VIP
BP	GO:0071313	cellular response to caffeine	-0.772671	-1.80008	0.0480048	CACNA1S/TMEM38A/RYR1/SLC8A1/RYR2/GSTM2/RYR3/CASQ2
MF	GO:0008179	adenylate cyclase binding	-0.773237	-1.9269	0.0193084	CALM1/AKAP12/ADRB2/ADCY5/ADCY2/CAP2/AKAP6/ADCYAP1R1
BP	GO:0051901	positive regulation of mitochondrial depolarization	-0.77491	-1.8053	0.0480048	MLLT11/DCN/ALOX12/MYOC
BP	GO:0015671	oxygen transport	-0.779682	-2.02152	0.0115925	MB/HBA1/HBQ1/HBD/HBZ/HBA2/HBG1/HBB/HBM/NGB
CC	GO:0099144	anchored component of synaptic membrane	-0.782774	-1.91291	0.0170195	RGS7BP/CNTN6/NTNG1/CNTN2/CPLX3/CNTN1
MF	GO:0033130	acetylcholine receptor binding	-0.783972	-1.87886	0.0262198	DLG4/PSCA/RIC3/LYNX1/LY6H/NRXN1
BP	GO:0010459	negative regulation of heart rate	-0.789403	-1.89188	0.0216792	RNLS/ADRA1A/AGTR2/PLN/SPX/TAC1
BP	GO:1900452	regulation of long-term synaptic depression	-0.790592	-2.01609	0.0115925	MAPT/ADCY8/GRID2/KCNB1/SORCS3/ARC
MF	GO:0005344	oxygen carrier activity	-0.791471	-2.01833	0.0115925	MB/HBA1/HBQ1/HBD/HBZ/HBA2/HBG1/HBB/HBM/NGB
CC	GO:0005833	hemoglobin complex	-0.794198	-1.94082	0.0144622	AHSP/HBA1/HBQ1/HBD/HBZ/HBA2/HBG1/HBB/HBM
MF	GO:0030280	structural constituent of epidermis	-0.796468	-2.10117	0.00951053	FLG2/HRNR/LOR/PKP1/SPRR2E/KRT2/FLG/SPRR1A/KRT1
BP	GO:1901077	regulation of relaxation of muscle	-0.79739	-1.91102	0.0216792	PDE4D/SLN/CHGA/NEUROG1/PLN
BP	GO:0010881	regulation of cardiac muscle contraction by regulation of the release of sequestered calcium ion	-0.799199	-2.23009	0.00951053	SLC8A1/RYR2/GSTM2/CACNA1C/DMD/ANK2/ATP1A2/CASQ2/PLN
BP	GO:0034115	negative regulation of heterotypic cell-cell adhesion	-0.799995	-1.86373	0.0238712	WNK1/IL10/MYADM/KLF4/IL1RN/ADIPOQ/APOA1
BP	GO:0070587	regulation of cell-cell adhesion involved in gastrulation	-0.799995	-1.86373	0.0238712	WNK1/IL10/MYADM/KLF4/IL1RN/ADIPOQ/APOA1
BP	GO:0051673	membrane disruption in other organism	-0.825683	-1.97883	0.0144079	DEFA4/LTF/RNASE7/DEFA6/DEFA5
MF	GO:0031720	haptoglobin binding	-0.833107	-1.94087	0.0115925	HBA1/HBQ1/HBD/HBZ/HBA2/HBG1/HBB/HBM
