# Supplementary material for: The landscape of alternative splicing reveals novel events associated with tumorigenesis and the immune microenvironment in gastric cancer
Source: Aging (Albany NY). 2021 Jan 10;13(3):4317–34. doi: 10.18632/aging.202393 (PMC7906195; doi:10.18632/aging.202393)
Supplement: Supplementary Table 7 [file aging-13-202393-s008.xlsx]

## Sheet: Sheet1
Table S7. KEGG GSEA between tumor and normal samples
KEGG ID	Description	enrichmentScore	NES	Adjusted P-value	gene ID
hsa03030	DNA replication	0.639054	1.94958	0.00640695	DNA2/MCM4/MCM2/POLD1/POLD3/RFC3/LIG1/MCM7/PCNA/FEN1/RNASEH2A/POLE2/MCM3/MCM5/PRIM2/MCM6/RFC4/POLE/RPA4/POLA2/POLA1/RFC2/PRIM1/RFC5/POLE3/RPA3
hsa05219	Bladder cancer	0.596399	1.86487	0.00640695	UPK3A/CDKN2A/E2F1/EGF/TYMP/ERBB2/MMP9/CXCL8/KRAS/E2F3/CCND1/SRC/E2F2/CDH1/MDM2/DAPK2/TP53/EGFR
hsa05322	Systemic lupus erythematosus	0.587359	2.23663	0.0048232	H2BW1/H2BW2/H3C12/C8B/FCGR1A/FCGR3A/H4C7/H2BC17/IFNG/LOC102724334/C2/C9/GRIN2B/H3C15/C8A/H2AC4/H2AC17/H3C10/H3C8/H3C11/H2BC3/H2AW/H2BC9/H2BC15/H4C12/H4C14/H2BC18/H2AC16/H2BC14/H2AC14/H2AC13/H2BC11/H2AC12/H4C13/H2AC11/H2AX/H2BC13/CD80/C4A/C3/H4C1/H2AC8/H4C8/H2BU1/H4C15/HLA-DQB1/H4C4/SNRPD1/C4B/H3-4/H2BC5/H2BC8/HLA-DRB5/H3C4/SNRPB/H2AC19/HLA-DOA/H4C6/H4C9/FCGR2A/H2AB1/HLA-DQA1/HLA-DRB1/H2BC6/H4C2/H…
hsa03460	Fanconi anemia pathway	0.578847	1.91257	0.0048232	EME1/FANCA/BRCA2/FANCI/BLM/RAD51/FANCB/UBE2T/FANCD2/BRIP1/RMI2/BRCA1/SLX1A/FAAP24/SLX1B/CENPS/FANCF/POLN/FANCG/FANCC/RMI1/RPA4/FANCL/SLX4/ATR/TELO2/FAAP100/HES1/PALB2/TOP3A/USP1
hsa03440	Homologous recombination	0.559939	1.75779	0.0184172	EME1/RAD54L/BRCA2/XRCC2/BLM/RAD51/RAD54B/RAD54B/BRIP1/POLD1/POLD3/BRCA1/XRCC3/RAD51D/RBBP8/TOPBP1/RPA4/PALB2/TOP3A/RPA3/SEM1/BARD1/NBN/BRCC3/SYCP3/MRE11/POLD2
hsa03008	Ribosome biogenesis in eukaryotes	0.541649	1.90473	0.0048232	NXF2/RPP25/NXF3/POP1/DKC1/GTPBP4/NOL6/NOP56/UTP14A/TCOF1/NOP58/HEATR1/GNL2/NXT2/WDR43/NAT10/POP4/WDR75/CSNK2A1/BMS1/GAR1/UTP18/XRN2/GNL3L/EIF6/REXO5/RPP38/PWP2/RPP40/IMP4/LSG1/XPO1/GNL3/DROSHA/UTP6/RIOK1/WDR3/NXT1/EMG1/NOB1/RRP7A/CSNK2B/RBM28/REXO1/FBL/MDN1/POP7/TBL3/UTP4
hsa04612	Antigen processing and presentation	0.524862	1.81117	0.0048232	CD8B2/IFNG/TAP1/TAP2/CTSB/KIR2DL3/KIR3DL2/IFI30/PDIA3/HLA-A/HLA-DQB1/KIR2DL1/HLA-DRB5/KLRC4/HLA-DOA/HLA-F/TAPBP/CIITA/HLA-B/HLA-G/HLA-DQA1/HLA-DRB1/KIR2DL4/CTSS/CD74/HLA-DMA/KLRC2/HSP90AB1/HLA-DQA1/HLA-DQA2/HSP90AA1/HLA-C/HSPA5/HLA-DPB1/CD4/CALR/PSME3/NFYA/PSME2/TNF/HLA-DPA1/CANX/HLA-E/KLRD1/RFX5/HLA-DMB/KIR3DL1/HSPA1B
hsa03050	Proteasome	0.521471	1.6719	0.0305665	IFNG/PSMD3/ADRM1/PSMB9/PSMD11/PSMB8/PSMB2/PSMC4/PSMD14/PSMD1/PSME3/PSMF1/PSME4/PSMA7/PSMA4/PSMB4/PSME2/PSMB3/PSMD13/PSMB7/PSMA5/SEM1/PSMD2/PSMD12/PSMA1/PSMC2/PSMA3/PSMA2/POMP/PSMB5/PSMB1/PSMD4/PSMD7
hsa00970	Aminoacyl-tRNA biosynthesis	0.521453	1.65926	0.035508	WARS1/DARS2/VARS1/MARS2/YARS1/NARS2/GARS1/FARSA/TARS1/AARS1/SARS2/TARS2/EPRS1/EARS2/CARS1/PARS2/KARS1/YARS2/VARS2/GATC/FARSB/IARS1/QRSL1/LARS2/NARS1/CARS2/IARS2/AARS2
hsa04110	Cell cycle	0.516458	1.9506	0.0048232	CCNE1/CDKN2A/PKMYT1/CDC6/SMC1B/E2F1/BUB1/CDK1/CDC25B/BUB1B/PLK1/CDC25C/CDC20/CDC25A/ORC6/CDC45/TTK/MCM4/ORC1/MAD2L1/MCM2/CCNB2/CCNA2/CDK6/CHEK1/CCNB1/E2F3/DBF4/MCM7/PCNA/CCND1/CDC7/CHEK2/SKP2/PRKDC/RBL1/PTTG1/MCM3/E2F5/MCM5/MCM6/CCNE2/MAD1L1/HDAC1/BUB3/E2F2/MAD2L2/MDM2/TP53/ORC2/CDK2/SMC1A/ATR
hsa04610	Complement and coagulation cascades	0.514448	1.83739	0.0048232	C4BPA/FGB/CFHR4/KNG1/FGG/PLAU/F5/C8B/PROC/SERPINE1/CFHR2/C2/C9/F2RL2/C8A/C4BPB/F2/ITGAX/F2R/F7/CFB/PLG/SERPINA1/SERPINF2/PLAUR/C4A/C3/ITGB2/MBL2/C4B/CD55/CFHR3/CR2
hsa04657	IL-17 signaling pathway	0.448911	1.62599	0.0241959	S100A7A/CSF2/CCL7/MMP13/MMP3/MUC5B/IL17C/CXCL10/MAPK15/CXCL6/S100A7/CXCL1/CXCL5/IL17RB/MMP9/IFNG/CCL20/CXCL8
hsa05160	Hepatitis C	0.436594	1.7037	0.0048232	CLDN6/CLDN9/IFNA8/IFNA1/CLDN2/CXCL10/CLDN16/CLDN1/IFNB1/E2F1/EGF/CLDN14/CLDN3/IFNG/OAS3/KRAS/CLDN4/SCARB1/IFNA5/CDK6/STAT1/CLDN25/OAS2/E2F3/BID/CCND1/TRAF2/CLDN7/CLDN23/MX1/IRF3/CASP8/FASLG/EIF2AK1/E2F2/RSAD2/IRF7/APAF1/IFNA14/BAX/CLDN10/STAT2/IKBKE/TYK2/TP53/OAS1/FADD/CDK2/EGFR/PIK3CB/PSME3/BAK1/YWHAB/NRAS/TRAF3/OCLN/TNF/IRF9/CTNNB1/YWHAZ/PIK3R2/DDX58/CDK4/IFNAR2/YWHAG/EIF2AK2
hsa05034	Alcoholism	0.43648	1.74045	0.0048232	H2BW1/SLC6A3/GNGT1/H2BW2/GRIN2D/H3C12/DRD2/DRD1/H4C7/PRKACG/H2BC17/PPP1R1B/LOC102724334/GRIN2B/H3C15/KRAS/H2AC4/SLC29A2/H2AC17/H3C10/H3C8/H3C11/H2BC3/H2AW/CALML5/H2BC9/H2BC15/GRIN3B/H4C12/H4C14/H2BC18/H2AC16/H2BC14/H2AC14/H2AC13/H2BC11/H2AC12/H4C13/BDNF/H2AC11/H2AX/H2BC13/HDAC10/H4C1/H2AC8/H4C8/H2BU1/H4C15/H4C4/H3-4/H2BC5/H2BC8/CALML6/H3C4/H2AC19/CALML4/CREB3L1/H4C6/H4C9
hsa05169	Epstein-Barr virus infection	0.425908	1.71109	0.0048232	CCNE1/IFNA8/IFNA1/CXCL10/IFNB1/E2F1/OAS3/TAP1/IFNA5/IRAK1/PSMD3/CCNA2/CDK6/STAT1/OAS2/E2F3/TAP2/NFKBIE/LYN/BID/CCND1/ISG15/TRAF2/RUNX3/ICAM1/SKP2/TLR2/JAK3/PDIA3/HLA-A/HLA-DQB1/HLA-DRB5/HLA-DOA/RELB/ADRM1/HLA-F/CR2/NFKB2/CCNE2/IRF3/CASP8/TAPBP/HDAC1/HLA-B/FCER2/HLA-G/HLA-DQA1/MAPK12/HLA-DRB1/E2F2/PSMD11/IRF7/PSMC4/APAF1/NFKBIB/PSMD14/MDM2/HLA-DMA/IFNA14/PSMD1/BAX/STAT2/IKBKE/TYK2/HLA-DQA1/HLA-DQA…
hsa05203	Viral carcinogenesis	0.421112	1.69702	0.0048232	H2BW1/H2BW2/CCNE1/CDKN2A/CCR8/CDK1/H4C7/PRKACG/H2BC17/CDC20/LOC102724334/KRAS/H2BC3/CCNA2/CDK6/ATP6V0D2/H2BC9/H2BC15/H4C12/H4C14/H2BC18/CHEK1/LYN/H2BC14/CCND1/H2BC11/TRAF2/H4C13/SKP2/SRC/JAK3/H2BC13/HDAC10/RBL1/C3/H4C1/KAT2A/H4C8/H2BU1/H4C15/PKM/HLA-A/H4C4/H2BC5/H2BC8/HLA-F/CREB3L1/SCRIB/NFKB2/H4C6/H4C9/CCNE2/MAD1L1/IRF3/CASP8/CCR5/HDAC1/HLA-B/HLA-G/LTBR/H2BC6/PXN/IRF7/H4C2/H2BC12/VAC14/MDM2/BAX/…
hsa04650	Natural killer cell mediated cytotoxicity	0.41556	1.56705	0.0265416	CSF2/IFNA8/ULBP1/IFNA1/ULBP2/IFNB1/FCGR3A/PRKCG/RAC3/IFNG/VAV2/GZMB/KRAS/TNFRSF10B/IFNA5/MICB/TNFRSF10A/BID/KIR2DL3/KIR3DL2/ICAM1/SH2D1B/ITGB2/ULBP3/HLA-A/LCK/KIR2DL1/SH3BP2/FCER1G/FASLG/HLA-B/HLA-G/KIR2DL4/IFNA14/KLRC2/IFNGR1/PRF1/PTPN6/NCR1/HLA-C/TYROBP/PIK3CB/KLRK1/KLRC4-KLRK1/ITGAL/LCP2/NRAS/TNF/SH2D1A/SYK/PIK3R2/HLA-E/KLRD1/PPP3CA/IFNAR2/VAV1/SHC1/KIR3DL1/IFNAR2/PLCG1/RAC1/IFNGR2/PPP3R2
hsa05202	Transcriptional misregulation in cancer	0.39927	1.59204	0.00932448	SSX1/HOXA11/HMGA2/CSF2/HOXA10/MMP3/HOXA9/H3C12/PLAU/TLX1/ETV4/IL3/SIX1/FCGR1A/SSX2/MET/MMP9/PAX8/SIX4/CXCL8/GZMB/RUNX1/H3C15/CEBPA/H3C10/H3C8/H3C11/PAX3/CCNA2/MYCN/ETV7/IGFBP3/PROM1/NSD2/PAX7
hsa05206	MicroRNAs in cancer	0.398332	1.56002	0.0186242	HMGA2/CYP24A1/IGF2BP1/CCNE1/TRIM71/CDKN2A/PLAU/DNMT3B/HOXD10/KIF23/E2F1/CDCA5/PRKCG/MET/CDC25B/SOX4/ERBB2/MMP9/FSCN1/CDC25C/CDC25A/KRAS/CDK6/E2F3/CCND1/EZH2/DNMT1/EFNA1/BRCA1/ST14/PDGFB/EFNA4/STMN1/PDGFRB
hsa04740	Olfactory transduction	0.383885	1.65882	0.0048232	OR56A3/OR8A1/OR5M11/OR8K5/OR8B12/OR2A12/OR13H1/OR10G2/OR2B6/OR2G2/OR5P3/OR1Q1/OR6C70/OR11G2/OR2F2/OR8D1/OR9A4/OR5V1/OR6C2/OR10Q1/OR1G1/OR14I1/OR6A2/OR52E6/OR8G5/OR8K1/OR4F21/OR2A14/OR10K1/OR5AU1/OR1L1/OR4B1/OR9A2/OR4C12/OR4C5/PRKACG/OR5AN1/OR52K2/OR52W1/OR11H6/OR4F6/OR2T11/OR1J1/OR52N2/OR14A16/OR10D3/OR8G1/OR8D2/OR7A17/OR2A2/OR10H1/OR1J4/OR6V1/OR2T8/OR52E4/OR52N5/OR52M1/CALML5/OR4K2/OR2M4/OR1N2/O…
hsa04060	Cytokine-cytokine receptor interaction	0.368884	1.54367	0.00624155	IFNL3/IFNL2/CSF2/CCL7/CSH2/IFNA8/BMP15/IL9/IFNA1/CXCL9/IL17C/CXCL10/AMH/CXCL6/IFNE/LIF/CXCL11/CCR8/CD70/INHBA/CXCL1/IL3/GDF15/IL37/IL11/IFNB1/CCL15/TNFRSF11B/CXCL5/TNFSF11/BMP8A/IL17RB/CCL18/TNFSF9/INHBB/TNFSF15/IFNG/CCL20/CXCL8/IFNL1/TNFRSF9/IL27/TNFRSF12A/CXCL16/TNFRSF10B/IL13RA2/IFNA5/CCL3/IL2RG/TNFSF18/GDF2/TNFRSF25/EDAR/IL32/IFNK/TNFRSF21/TNFRSF10A/GH2/RELT/IL2RA/OSM/CSF2RA/BMP4/ACVR1C/CXCR3…
hsa05165	Human papillomavirus infection	0.341478	1.44584	0.0180467	IBSP/CCNE1/WNT2/IFNA8/LAMC2/IFNA1/HES3/COL9A3/SPP1/TERT/COL1A1/WNT11/COMP/WNT8B/IFNB1/E2F1/LAMA3/EGF/PRKACG/LAMB3/KRAS/THBS2/COL9A1/AXIN2/ITGB4/HES6/ITGA6/COL1A2/IFNA5/ATP6V1B1/CCNA2/CDK6/ATP6V0D2/STAT1/ITGB6/WNT10A/CCND1/PARD6B/LLGL2/ISG15/ITGA10/LFNG/ITGA2/ITGA11/FZD6/TCF7/RBL1/TCIRG1/ITGB8/PDGFRB/PKM/HLA-A/LAMC3/WNT7A/WNT7B/HLA-F/CREB3L1/SCRIB/CCNE2/MX1/FZD2/BCAP31/IRF3/AXIN1/CASP8/FASLG/HDAC1…
hsa04921	Oxytocin signaling pathway	-0.358303	-1.48141	0.0288644	ADCY9/PTGS2/MEF2C/PRKAG3/PPP1CB/CACNB4/RYR1/CAMK1/CALM1/NPR2/KCNJ12/NFATC4/CAMK2G/PPP1R12A/MYLK3/PPP1R12C/JUN/GNAI1/FOS/ITPR1/GUCY1A1/CACNG2/PRKCB/MYL6/CACNA2D1/GUCY1B1/CAMK2B/NPR1/RGS2/PRKAA2/RYR2/CACNA1C/CACNA2D3/ADCY5/CALML3/GNAO1/ADCY2/CACNG7/CACNB2/ADCY8/PPP1R12B/PLA2G4D/MYL9/MYLK/RYR3/CAMK2A
hsa04726	Serotonergic synapse	-0.381083	-1.50494	0.0392308	SLC18A2/CYP2C18/GNG2/MAOA/GNG11/GNG3/HTR3A/GABRB2/CYP2C9/HTR2B/GNB4/ALOX12B/GNAI1/ITPR1/HTR1A/HTR1B/PRKCB/HTR3B/MAOB/HTR7/GNG8/DUSP1/PTGS1/GNG7/ALOX15B/TRPC1/CACNA1B/CACNA1C/KCNN2/ADCY5/GNAO1/HTR5A/SLC6A4/PLA2G4D/HTR4/HTR1E/ALOX12
hsa04931	Insulin resistance	-0.390832	-1.52958	0.0340627	PRKAG3/PCK2/PPP1CB/PIK3R1/GFPT2/CREB3L3/SOCS3/PCK1/CREB5/PRKCB/G6PC2/CD36/AKT3/INS/ACACB/PPP1R3A/PRKAA2/RPS6KA6/PPP1R3C/IL6/SLC2A2/SLC2A4/SLC27A6/GYS2/PYGM/G6PC
hsa04152	AMPK signaling pathway	-0.404787	-1.61223	0.0180467	TBC1D1/CREB3L3/PFKM/PCK1/LEPR/PPP2R3A/CREB5/G6PC2/PPP2R2B/CD36/AKT3/INS/ACACB/PRKAA2/CCNA1/FBP2/ADRA1A/CAB39L/IRS4/IRS4/ADIPOQ/SLC2A4/LEP/GYS2/G6PC
hsa04725	Cholinergic synapse	-0.405469	-1.59922	0.0186242	GNG11/GNG3/BCL2/KCNJ12/CREB3L3/CHRM3/GNB4/CAMK2G/GNAI1/FOS/ITPR1/CREB5/PRKCB/CAMK2B/GNG8/KCNQ4/AKT3/GNG7/CHRNA4/CHRNB4/CHAT/KCNQ5/CACNA1B/CACNA1C/CHRM4/ADCY5/GNAO1/ADCY2/CHRNA3/ADCY8/SLC18A3/CAMK2A/CHRM2/SLC5A7
hsa05150	Staphylococcus aureus infection	-0.40844	-1.56066	0.0340627	KRT27/DEFB4A/DEFB4B/DEFB103B/DEFB103A/KRT38/KRT16/KRT20/FCGR3B/DEFB4A/DEFB4B/MASP1/KRT28/KRT33A/CFD/KRT15/KRT34/LOC100653049/KRT33B/KRT13/DSG1/KRT31/KRT37/DEFA6/KRT32/DEFA5/KRT35
hsa04922	Glucagon signaling pathway	-0.410456	-1.60207	0.0180467	PDHA2/SIK1B/CREB3L3/PFKM/CAMK2G/ITPR1/PCK1/CREB5/G6PC2/CAMK2B/GCK/AKT3/ACACB/PRKAA2/FBP2/CALML3/ADCY2/SLC2A2/CAMK2A/GCG/GYS2/PYGM/G6PC
hsa05410	Hypertrophic cardiomyopathy (HCM)	-0.419474	-1.59457	0.0251202	CACNA2D1/ITGA1/ITGA9/SLC8A3/SLC8A1/PRKAA2/ITGA8/SGCD/RYR2/ITGA7/CACNA1C/CACNA2D3/MYL3/CACNG7/DMD/CACNB2/TPM1/IL6/SGCA/TPM2/DES/SLC8A2/SGCG
hsa04080	Neuroactive ligand-receptor interaction	-0.421329	-1.90754	0.0048232	GABRB2/S1PR3/GNRHR/EDN3/LTB4R/CHRM3/HTR2B/NR3C1/ADRA1D/LPAR1/POMC/GRIA3/HTR1A/NMUR1/LEPR/GLRA2/TAAR1/HTR1B/SCT/CRHR1/ADCYAP1/THRB/GRID1/CYSLTR1/GRIN2A/GABBR1/HTR7/BDKRB1/P2RY1/HRH2/TACR1/NPBWR2/GH1/MC5R/LPAR3/GRIK1/CALCB/CRHR1/CHRNA2/PRSS2/ADRB2/CHRNA4/CHRNB4/P2RX6/CTSG/AVPR1A/AVP/PTGER3/MLN/GLP2R/ADRA1A/CNR1/TAAR2/PTH1R/NPY5R/GRP/GLRB/P2RY14/EDN2/SCTR/CHRM4/GRIA1/CALCA/VIPR2/MTNR1B/TSHB/GRIA4/PR…
hsa04915	Estrogen signaling pathway	-0.42901	-1.74277	0.0048232	ESR1/CALM1/KRT36/PIK3R1/KRT27/BCL2/CREB3L3/KRT38/KRT16/KRT20/JUN/GNAI1/FOS/POMC/ITPR1/CREB5/GABBR1/FKBP5/GPER1/AKT3/TFF1/KRT28/KRT33A/KRT15/ADCY5/CALML3/HSPA2/GNAO1/ADCY2/KRT34/LOC100653049/KRT33B/ADCY8/KRT13/PGR/KRT31/KRT37/KRT32/KRT35
hsa04024	cAMP signaling pathway	-0.437418	-1.88399	0.0048232	PTGER2/RAP1A/PDE4D/CREB3L3/EDN3/CAMK2G/PPP1R12A/JUN/GNAI1/FOS/TIAM1/ATP1A3/POMC/HCN2/GRIA3/HTR1A/HTR1B/ADCYAP1/CREB5/GRIN2A/GABBR1/CAMK2B/HCAR3/HCAR2/AKT3/NPR1/GLI3/ADRB2/PTGER3/PDE3A/RYR2/ATP2B4/EDN2/CACNA1C/GRIA1/VIPR2/TSHB/GRIA4/LHCGR/ATP1B2/ADCY5/FXYD1/CALML3/ADCY2/ADCY8/GHSR/HTR4/FSHR/CNGA3/GPR119/MYL9/HTR1E/CAMK2A/ATP2B3/ADCYAP1R1/CGA/GCG/ATP1A2/GHRL/PLN/ATP2B2/NPY/CHRM2/GRIA2/VIP/SST/GIP
hsa05414	Dilated cardiomyopathy (DCM)	-0.440284	-1.68976	0.0103085	ITGA1/ITGA9/SLC8A3/SLC8A1/ITGA8/SGCD/RYR2/ITGA7/CACNA1C/CACNA2D3/MYL3/ADCY5/ADCY2/CACNG7/DMD/CACNB2/TPM1/ADCY8/SGCA/TPM2/DES/SLC8A2/PLN/SGCG
hsa04020	Calcium signaling pathway	-0.44582	-1.89066	0.0048232	PLCD1/CHRM3/HTR2B/CAMK2G/MYLK3/ADRA1D/ITPR1/PDE1A/PRKCB/GNAL/CYSLTR1/GRIN2A/CAMK2B/HTR7/BDKRB1/HRH2/TACR1/PDE1B/SLC8A3/ADRB2/ITPKB/P2RX6/AVPR1A/PTGER3/SLC8A1/SLC25A4/PDE1C/ADRA1A/RYR2/CACNA1B/ATP2B4/CACNA1C/PTGFR/PLCD4/NOS1/LHCGR/CASQ1/CALML3/ADCY2/CACNA1H/HTR5A/ADCY8/P2RX2/HTR4/AGTR1/SLC8A2/MYLK/TACR2/ADRB3/RYR3/CAMK2A/ATP2B3/CCKBR/CASQ2/PLN/GRPR/CCKAR/ATP2B2/CHRM2
hsa04972	Pancreatic secretion	-0.44884	-1.74232	0.00820422	RAP1A/CA2/PLA2G12B/CHRM3/CPA3/CLCA4/ATP1A3/ITPR1/CLCA2/SCT/PRKCB/PRSS2/PLA2G3/RYR2/TRPC1/ATP2B4/SCTR/CLCA1/ATP1B2/CPB1/ADCY5/ADCY2/ADCY8/KCNMA1/PLA2G2C/ATP2B3/ATP1A2/CCKAR/ATP2B2/CPA2
hsa00982	Drug metabolism - cytochrome P450	-0.455141	-1.65791	0.0235784	ADH1C/GSTM1/MAOA/CYP2C9/ALDH3B2/UGT2B15/GSTT2B/HPGDS/MAOB/GSTA1/CYP3A4/CYP1A2/GSTM2/AOX1/UGT1A1/UGT1A5/GSTM5/ALDH3A1/ADH1B/GSTA5/GSTA2/UGT1A4/UGT1A7/ADH7/UGT2B17/GSTA3
hsa05204	Chemical carcinogenesis	-0.457367	-1.70636	0.00820422	CYP2C18/ADH1C/GSTM1/CYP1A1/CYP2C9/CYP1B1/ALDH3B2/UGT2B15/CYP2A13/GSTT2B/HPGDS/CBR1/GSTA1/CYP3A4/CYP1A2/GSTM2/UGT1A1/UGT1A5/SULT2A1/GSTM5/ALDH3A1/ADH1B/GSTA5/GSTA2/UGT1A4/UGT1A7/ADH7/UGT2B17/GSTA3
hsa04022	cGMP-PKG signaling pathway	-0.462895	-1.93064	0.0048232	CREB3L3/NFATC4/PPP1R12A/MYLK3/ADRA1D/GNAI1/ATP1A3/ITPR1/GUCY1A1/CREB5/GUCY1B1/AKT3/NPR1/INS/SLC8A3/ADRB2/PRKG1/PDE2A/SLC8A1/SLC25A4/PDE3A/RGS2/MRVI1/ADRA1A/IRS4/ATP2B4/CACNA1C/PDE5A/IRS4/ATP1B2/ADCY5/NPPC/CALML3/ADCY2/ADCY8/KCNMB2/KCNMB1/AGTR1/KCNMA1/SLC8A2/MYL9/MYLK/ADRB3/ATP2B3/ATP1A2/PLN/ATP2B2
hsa04261	Adrenergic signaling in cardiomyocytes	-0.465658	-1.91526	0.0048232	CREB3L3/SCN5A/CAMK2G/ADRA1D/GNAI1/ATP1A3/CACNG2/RPS6KA5/PPP2R3A/CREB5/CACNA2D1/PPP2R2B/CAMK2B/AKT3/SLC8A3/ADRB2/SLC8A1/ADRA1A/RYR2/ATP2B4/CACNA1C/CACNA2D3/MYL3/ATP1B2/ADCY5/CALML3/ADCY2/CACNG7/CACNB2/TPM1/ADCY8/TPM2/AGTR1/SLC8A2/AGTR2/CAMK2A/ATP2B3/ATP1A2/PLN/SCN7A/ATP2B2/PPP1R1A
hsa04924	Renin secretion	-0.46581	-1.69677	0.0121359	PRKG2/PTGER2/EDN3/CLCA4/GNAI1/ITPR1/GUCY1A1/CLCA2/PDE1A/ADCYAP1/GUCY1B1/PDE1B/NPR1/ADRB2/PDE3A/PDE1C/EDN2/CACNA1C/CLCA1/ADCY5/CALML3/AGTR1/KCNMA1/ADRB3/ADCYAP1R1
hsa04730	Long-term depression	-0.473873	-1.67835	0.0290694	PRKG2/GNAI1/ITPR1/GRIA3/GUCY1A1/CRHR1/PRKCB/GUCY1B1/GNAZ/CRHR1/PRKG1/GRIA1/NOS1/GNAO1/PLA2G4D/GRID2/GRIA2
hsa03320	PPAR signaling pathway	-0.477523	-1.76611	0.00820422	ANGPTL4/AQP7/ACADM/PCK2/ME1/ACSL6/LPL/CYP4A11/PCK1/FABP1/CYP8B1/CYP7A1/ILK/ACSBG1/PLIN5/FABP5/CD36/ACOX2/ACADL/FABP2/FABP4/PLIN1/SORBS1/ADIPOQ/APOA1/SLC27A6/RXRG/PLIN4/APOC3
hsa04713	Circadian entrainment	-0.485339	-1.87075	0.0048232	RYR1/GNG2/CALM1/GNG11/PRKG2/GNG3/GNB4/CAMK2G/GNAI1/FOS/ITPR1/GRIA3/GUCY1A1/RPS6KA5/PER3/ADCYAP1/PRKCB/GRIN2A/GUCY1B1/CAMK2B/GNG8/PER1/GNG7/PRKG1/RYR2/CACNA1C/GRIA1/MTNR1B/GRIA4/NOS1/ADCY5/CALML3/GNAO1/ADCY2/CACNA1H/ADCY8/RYR3/CAMK2A/ADCYAP1R1/GRIA2
hsa05412	Arrhythmogenic right ventricular cardiomyopathy (ARVC)	-0.486735	-1.80558	0.00820422	DSC2/DSP/LAMA2/CACNG2/CACNA2D1/TCF7L1/ITGA1/GJA1/ITGA9/CDH2/SLC8A3/SLC8A1/ITGA8/SGCD/RYR2/ITGA7/CACNA1C/CACNA2D3/CACNG7/DMD/CACNB2/SGCA/DES/SLC8A2/ACTN2/SGCG/CTNNA3
hsa04978	Mineral absorption	-0.494092	-1.73612	0.0180467	MT1E/MT1G/SLC26A9/SLC5A1/SLC46A1/SLC34A1/TRPV6/ATP1A3/MT1X/CYBRD1/MT1A/MT1M/SLC6A19/SLC8A3/SLC8A1/ATP2B4/ATP1B2/SLC8A2/ATP2B3/MT1B/S100G/ATP1A2/ATP2B2
hsa00980	Metabolism of xenobiotics by cytochrome P450	-0.494962	-1.82241	0.00640695	ADH1C/GSTM1/CYP1A1/CYP2F1/CYP2C9/AKR7A3/CYP1B1/ALDH3B2/UGT2B15/CBR3/CYP2A13/GSTT2B/HPGDS/CBR1/AKR1C1/GSTA1/CYP3A4/CYP1A2/GSTM2/UGT1A1/UGT1A5/SULT2A1/GSTM5/ALDH3A1/ADH1B/GSTA5/GSTA2/UGT1A4/UGT1A7/ADH7/UGT2B17/GSTA3
hsa04270	Vascular smooth muscle contraction	-0.495118	-2.00214	0.0048232	PLA2G12B/EDN3/PPP1R12A/MYLK3/PPP1R12C/CYP4A11/ADRA1D/ITPR1/GUCY1A1/PRKCB/MYL6/GUCY1B1/NPR1/CALCB/PLA2G3/PRKG1/AVPR1A/AVP/MRVI1/ADRA1A/EDN2/PPP1R14A/CACNA1C/CALCA/ACTA2/ADCY5/NPPC/CALML3/ADCY2/CALD1/ADCY8/PPP1R12B/PLA2G4D/KCNMB2/KCNMB1/AGTR1/KCNMA1/PLA2G2C/MYL9/MYLK/ACTG2/MYH11
hsa04920	Adipocytokine signaling pathway	-0.496713	-1.80361	0.00820422	SOCS3/POMC/PCK1/LEPR/G6PC2/ACSBG1/CD36/AKT3/ACACB/PRKAA2/IRS4/IRS4/ADIPOQ/SLC2A4/LEP/RXRG/NPY/G6PC
hsa00350	Tyrosine metabolism	-0.523149	-1.67966	0.0495475	TYR/TH/ADH1C/MAOA/ALDH3B2/HPD/MAOB/TPO/AOX1/AOC3/DCT/ALDH3A1/ADH1B/ADH7
hsa04911	Insulin secretion	-0.536708	-2.02743	0.0048232	CREB3L3/CHRM3/CAMK2G/ATP1A3/ADCYAP1/CREB5/PRKCB/CAMK2B/GCK/INS/FFAR1/KCNN3/ABCC8/RYR2/CACNA1C/KCNN2/ATP1B2/ADCY5/ADCY2/ADCY8/SLC2A2/KCNMB2/KCNMB1/KCNMA1/GPR119/CAMK2A/ADCYAP1R1/GCG/ATP1A2/CCKAR/GIP
hsa04923	Regulation of lipolysis in adipocytes	-0.572352	-1.99544	0.0048232	ABHD5/PRKACB/MGLL/ADCY9/PTGS2/AQP7/NPY1R/PIK3R1/PRKG2/GNAI1/PTGS1/AKT3/NPR1/INS/ADRB2/PRKG1/PTGER3/IRS4/TSHB/IRS4/ADCY5/FABP4/ADCY2/ADCY8/PLIN1/ADRB3/CGA/NPY
hsa04971	Gastric acid secretion	-0.582632	-2.15486	0.0048232	CA2/CHRM3/CAMK2G/MYLK3/GNAI1/ATP1A3/ITPR1/PRKCB/KCNJ1/CAMK2B/HRH2/KCNJ15/SLC26A7/ATP1B2/ADCY5/SLC9A4/CALML3/ADCY2/ADCY8/MYLK/CAMK2A/CCKBR/ATP1A2/KCNJ16/KCNE2/SST/ATP4A/ATP4B/GAST
