# Supplementary material for: The landscape of alternative splicing reveals novel events associated with tumorigenesis and the immune microenvironment in gastric cancer
Source: Aging (Albany NY). 2021 Jan 10;13(3):4317–34. doi: 10.18632/aging.202393 (PMC7906195; doi:10.18632/aging.202393)
Supplement: Supplementary Table 8 [file aging-13-202393-s009.xlsx]

## Sheet: Sheet1
Table S8. Functional enrichment analysis for module 1
Term	ID	Description	GeneRatio	BgRatio	Adjusted P-value	geneID
BP	GO:0006413	translational initiation	6/8	193/18670	2.8900015067702e-09	RPS3A/RPL18A/RPL32/RPS6/RPS21/EIF4A2
BP	GO:0006614	SRP-dependent cotranslational protein targeting to membrane	5/8	105/18670	9.37482596228823e-09	RPS3A/RPL18A/RPL32/RPS6/RPS21
BP	GO:0006613	cotranslational protein targeting to membrane	5/8	109/18670	9.37482596228823e-09	RPS3A/RPL18A/RPL32/RPS6/RPS21
BP	GO:0045047	protein targeting to ER	5/8	118/18670	9.37482596228823e-09	RPS3A/RPL18A/RPL32/RPS6/RPS21
BP	GO:0072599	establishment of protein localization to endoplasmic reticulum	5/8	122/18670	9.37482596228823e-09	RPS3A/RPL18A/RPL32/RPS6/RPS21
BP	GO:0070972	protein localization to endoplasmic reticulum	5/8	147/18670	2.06317209353973e-08	RPS3A/RPL18A/RPL32/RPS6/RPS21
BP	GO:0019083	viral transcription	5/8	177/18670	4.60436077446871e-08	RPS3A/RPL18A/RPL32/RPS6/RPS21
BP	GO:0019080	viral gene expression	5/8	191/18670	6.00240264276203e-08	RPS3A/RPL18A/RPL32/RPS6/RPS21
BP	GO:0006612	protein targeting to membrane	5/8	202/18670	7.15764249046133e-08	RPS3A/RPL18A/RPL32/RPS6/RPS21
BP	GO:0000956	nuclear-transcribed mRNA catabolic process	5/8	207/18670	7.3570877657335e-08	RPS3A/RPL18A/RPL32/RPS6/RPS21
BP	GO:0002181	cytoplasmic translation	4/8	100/18670	4.13460649122612e-07	RPL18A/RPL32/RPS21/EIF4A2
BP	GO:0090150	establishment of protein localization to membrane	5/8	332/18670	6.61658711434224e-07	RPS3A/RPL18A/RPL32/RPS6/RPS21
BP	GO:0006402	mRNA catabolic process	5/8	364/18670	9.71710997633796e-07	RPS3A/RPL18A/RPL32/RPS6/RPS21
BP	GO:0006401	RNA catabolic process	5/8	397/18670	1.39658924089982e-06	RPS3A/RPL18A/RPL32/RPS6/RPS21
BP	GO:0006605	protein targeting	5/8	432/18670	1.99217389168126e-06	RPS3A/RPL18A/RPL32/RPS6/RPS21
BP	GO:0000460	maturation of 5.8S rRNA	2/8	27/18670	0.000306857514645255	RPS21/LAS1L
BP	GO:0006364	rRNA processing	3/8	214/18670	0.000411810081816905	RPS6/RPS21/LAS1L
BP	GO:0016072	rRNA metabolic process	3/8	253/18670	0.000640996168934243	RPS6/RPS21/LAS1L
BP	GO:0042254	ribosome biogenesis	3/8	297/18670	0.000978102806197737	RPS6/RPS21/LAS1L
BP	GO:0042274	ribosomal small subunit biogenesis	2/8	67/18670	0.00155139773327544	RPS6/RPS21
BP	GO:0034470	ncRNA processing	3/8	384/18670	0.0018925545525399	RPS6/RPS21/LAS1L
BP	GO:0000478	endonucleolytic cleavage involved in rRNA processing	1/8	11/18670	0.0182303867702647	RPS21
BP	GO:0061684	chaperone-mediated autophagy	1/8	16/18670	0.0244906952030316	EEF1A1
BP	GO:0090305	nucleic acid phosphodiester bond hydrolysis	2/8	302/18670	0.0244906952030316	RPS21/LAS1L
BP	GO:0000470	maturation of LSU-rRNA	1/8	21/18670	0.0301122895987539	LAS1L
BP	GO:0000469	cleavage involved in rRNA processing	1/8	22/18670	0.0301122895987539	RPS21
BP	GO:0048821	erythrocyte development	1/8	33/18670	0.0433091211221256	RPS6
BP	GO:0002183	cytoplasmic translational initiation	1/8	34/18670	0.0433091211221256	EIF4A2
BP	GO:0043029	T cell homeostasis	1/8	37/18670	0.0443799066816096	RPS6
BP	GO:0034248	regulation of cellular amide metabolic process	2/8	483/18670	0.0461303971840746	EEF1A1/EIF4A2
BP	GO:0071364	cellular response to epidermal growth factor stimulus	1/8	43/18670	0.0485747923103932	EEF1A1
BP	GO:0030490	maturation of SSU-rRNA	1/8	46/18670	0.0486161447074182	RPS21
BP	GO:0070231	T cell apoptotic process	1/8	47/18670	0.0486161447074182	RPS6
BP	GO:0070849	response to epidermal growth factor	1/8	47/18670	0.0486161447074182	EEF1A1
BP	GO:0043628	ncRNA 3'-end processing	1/8	48/18670	0.0486161447074182	RPS21
CC	GO:0044445	cytosolic part	6/8	247/19717	4.68814316374001e-09	RPS3A/RPL18A/RPL32/RPS6/RPS21/LAS1L
CC	GO:0022626	cytosolic ribosome	5/8	112/19717	7.01696828557038e-09	RPS3A/RPL18A/RPL32/RPS6/RPS21
CC	GO:0044391	ribosomal subunit	5/8	190/19717	6.75585863605174e-08	RPS3A/RPL18A/RPL32/RPS6/RPS21
CC	GO:0005844	polysome	4/8	72/19717	1.32936024434038e-07	RPL18A/RPL32/RPS6/RPS21
CC	GO:0005840	ribosome	5/8	272/19717	2.45095447019211e-07	RPS3A/RPL18A/RPL32/RPS6/RPS21
CC	GO:0042788	polysomal ribosome	3/8	32/19717	1.69400323375626e-06	RPL18A/RPL32/RPS21
CC	GO:0022627	cytosolic small ribosomal subunit	3/8	44/19717	3.8682323581739e-06	RPS3A/RPS6/RPS21
CC	GO:0015935	small ribosomal subunit	3/8	72/19717	1.51608030874161e-05	RPS3A/RPS6/RPS21
CC	GO:0022625	cytosolic large ribosomal subunit	2/8	63/19717	0.00145113696624461	RPL18A/RPL32
CC	GO:0015934	large ribosomal subunit	2/8	121/19717	0.00479808997203915	RPL18A/RPL32
CC	GO:0036464	cytoplasmic ribonucleoprotein granule	2/8	212/19717	0.0131914271832887	RPS6/EIF4A2
CC	GO:0035770	ribonucleoprotein granule	2/8	223/19717	0.0133527526368424	RPS6/EIF4A2
CC	GO:0016281	eukaryotic translation initiation factor 4F complex	1/8	13/19717	0.0190292599996498	EIF4A2
CC	GO:1905354	exoribonuclease complex	1/8	25/19717	0.0316479674795199	LAS1L
CC	GO:0044665	MLL1/2 complex	1/8	29/19717	0.0319414112493689	LAS1L
CC	GO:0071339	MLL1 complex	1/8	29/19717	0.0319414112493689	LAS1L
CC	GO:1902555	endoribonuclease complex	1/8	31/19717	0.0319414112493689	LAS1L
CC	GO:1905348	endonuclease complex	1/8	32/19717	0.0319414112493689	LAS1L
MF	GO:0003735	structural constituent of ribosome	5/8	202/17697	2.20958218488429e-07	RPS3A/RPL18A/RPL32/RPS6/RPS21
KEGG	hsa03010	Ribosome	5/7	158/8037	6.73145e-07	RPS3A/RPL18A/RPL32/RPS6/RPS21
