# Supplementary material for: The landscape of alternative splicing reveals novel events associated with tumorigenesis and the immune microenvironment in gastric cancer
Source: Aging (Albany NY). 2021 Jan 10;13(3):4317–34. doi: 10.18632/aging.202393 (PMC7906195; doi:10.18632/aging.202393)
Supplement: Supplementary Table 9 [file aging-13-202393-s010.xlsx]

## Sheet: Sheet1
Table S9. Functional enrichment analysis for module 2
Term	ID	Description	GeneRatio	BgRatio	Adjusted P-value	geneID
BP	GO:0034329	cell junction assembly	3/9	241/18670	0.00155842124406731	JUP/VCL/CTNND1
BP	GO:0034330	cell junction organization	3/9	290/18670	0.00230480226975538	JUP/VCL/CTNND1
BP	GO:1990778	protein localization to cell periphery	3/9	311/18670	0.0026414743783993	JUP/ANK3/SPTBN1
CC	GO:0005938	cell cortex	5/9	308/19717	9.70125975459916e-06	SPTAN1/SPTBN1/TRAK1/SPTB/CTNND1
CC	GO:0044448	cell cortex part	4/9	184/19717	3.15490463499755e-05	SPTAN1/SPTBN1/SPTB/CTNND1
CC	GO:0044449	contractile fiber part	4/9	221/19717	3.15490463499755e-05	JUP/VCL/ANK3/SPTBN1
CC	GO:0030016	myofibril	4/9	224/19717	3.15490463499755e-05	JUP/VCL/ANK3/SPTBN1
CC	GO:0043292	contractile fiber	4/9	234/19717	3.15490463499755e-05	JUP/VCL/ANK3/SPTBN1
CC	GO:0044291	cell-cell contact zone	3/9	71/19717	4.16325739472278e-05	JUP/VCL/ANK3
CC	GO:0030864	cortical actin cytoskeleton	3/9	90/19717	7.48695718924017e-05	SPTAN1/SPTBN1/SPTB
CC	GO:0030863	cortical cytoskeleton	3/9	116/19717	0.000115383835353743	SPTAN1/SPTBN1/SPTB
CC	GO:0005913	cell-cell adherens junction	3/9	117/19717	0.000115383835353743	JUP/VCL/CTNND1
CC	GO:0043034	costamere	2/9	19/19717	0.000187245325560132	VCL/ANK3
CC	GO:0005911	cell-cell junction	4/9	459/19717	0.000187245325560132	JUP/VCL/ANK3/CTNND1
CC	GO:0030017	sarcomere	3/9	204/19717	0.000414773192071857	JUP/ANK3/SPTBN1
CC	GO:0016328	lateral plasma membrane	2/9	57/19717	0.00131299262632049	JUP/ANK3
CC	GO:0030018	Z disc	2/9	132/19717	0.00537507442249819	JUP/ANK3
CC	GO:0042383	sarcolemma	2/9	136/19717	0.00549047378595439	VCL/ANK3
CC	GO:0031674	I band	2/9	143/19717	0.00584583785902536	JUP/ANK3
CC	GO:0099572	postsynaptic specialization	2/9	348/19717	0.0195303109509868	SPTBN1/CTNND1
CC	GO:0098978	glutamatergic synapse	2/9	349/19717	0.0195303109509868	SPTBN1/CTNND1
CC	GO:0098984	neuron to neuron synapse	2/9	350/19717	0.0195303109509868	SPTBN1/CTNND1
CC	GO:0031252	cell leading edge	2/9	403/19717	0.0228543220022317	SPTBN1/CTNND1
CC	GO:0005925	focal adhesion	2/9	405/19717	0.0228543220022317	JUP/VCL
CC	GO:0005924	cell-substrate adherens junction	2/9	408/19717	0.0228543220022317	JUP/VCL
CC	GO:0030055	cell-substrate junction	2/9	412/19717	0.0228673024425697	JUP/VCL
CC	GO:0016529	sarcoplasmic reticulum	1/9	71/19717	0.0422894976530811	ANK3
MF	GO:0045296	cadherin binding	6/9	331/17697	9.83727093718497e-08	JUP/VCL/ANK3/SPTAN1/SPTBN1/CTNND1
MF	GO:0050839	cell adhesion molecule binding	6/9	499/17697	5.71948473335215e-07	JUP/VCL/ANK3/SPTAN1/SPTBN1/CTNND1
MF	GO:0003779	actin binding	4/9	431/17697	0.000217379839569926	VCL/SPTAN1/SPTBN1/SPTB
BP	GO:0007409	axonogenesis	6/9	468/18670	6.30634070368899e-06	VCL/ANK3/SPTAN1/SPTBN1/TRAK1/SPTB
BP	GO:0051693	actin filament capping	3/9	38/18670	9.08169111702354e-05	SPTAN1/SPTBN1/SPTB
BP	GO:0030835	negative regulation of actin filament depolymerization	3/9	41/18670	9.08169111702354e-05	SPTAN1/SPTBN1/SPTB
BP	GO:0030834	regulation of actin filament depolymerization	3/9	51/18670	0.000108088140843183	SPTAN1/SPTBN1/SPTB
BP	GO:0030042	actin filament depolymerization	3/9	54/18670	0.000108088140843183	SPTAN1/SPTBN1/SPTB
BP	GO:0006888	ER to Golgi vesicle-mediated transport	4/9	212/18670	0.000108088140843183	ANK3/SPTAN1/SPTBN1/SPTB
BP	GO:0030837	negative regulation of actin filament polymerization	3/9	58/18670	0.000112199302185404	SPTAN1/SPTBN1/SPTB
BP	GO:1901880	negative regulation of protein depolymerization	3/9	66/18670	0.000145313389533698	SPTAN1/SPTBN1/SPTB
BP	GO:0032272	negative regulation of protein polymerization	3/9	72/18670	0.000168102970467507	SPTAN1/SPTBN1/SPTB
BP	GO:0043242	negative regulation of protein complex disassembly	3/9	75/18670	0.000171170983676637	SPTAN1/SPTBN1/SPTB
BP	GO:0034109	homotypic cell-cell adhesion	3/9	81/18670	0.000193718311142182	JUP/VCL/ANK3
BP	GO:1901879	regulation of protein depolymerization	3/9	83/18670	0.000193718311142182	SPTAN1/SPTBN1/SPTB
BP	GO:0007016	cytoskeletal anchoring at plasma membrane	2/9	10/18670	0.000237635792971823	JUP/ANK3
BP	GO:0051261	protein depolymerization	3/9	109/18670	0.000367557486541664	SPTAN1/SPTBN1/SPTB
BP	GO:0048193	Golgi vesicle transport	4/9	368/18670	0.000367557486541664	ANK3/SPTAN1/SPTBN1/SPTB
BP	GO:0043244	regulation of protein complex disassembly	3/9	113/18670	0.000367557486541664	SPTAN1/SPTBN1/SPTB
BP	GO:0032970	regulation of actin filament-based process	4/9	388/18670	0.000399959983836578	JUP/SPTAN1/SPTBN1/SPTB
BP	GO:0090136	epithelial cell-cell adhesion	2/9	15/18670	0.000399959983836578	JUP/VCL
BP	GO:0007043	cell-cell junction assembly	3/9	124/18670	0.000408887203495964	JUP/VCL/CTNND1
BP	GO:0031333	negative regulation of protein complex assembly	3/9	139/18670	0.000529653753269152	SPTAN1/SPTBN1/SPTB
BP	GO:0034332	adherens junction organization	3/9	142/18670	0.000529653753269152	JUP/VCL/CTNND1
BP	GO:1902904	negative regulation of supramolecular fiber organization	3/9	142/18670	0.000529653753269152	SPTAN1/SPTBN1/SPTB
BP	GO:0051494	negative regulation of cytoskeleton organization	3/9	148/18670	0.000573261392043176	SPTAN1/SPTBN1/SPTB
BP	GO:0045216	cell-cell junction organization	3/9	156/18670	0.000642796374734158	JUP/VCL/CTNND1
BP	GO:0030833	regulation of actin filament polymerization	3/9	162/18670	0.000690554014767024	SPTAN1/SPTBN1/SPTB
BP	GO:0008064	regulation of actin polymerization or depolymerization	3/9	179/18670	0.000871841737342674	SPTAN1/SPTBN1/SPTB
BP	GO:0030832	regulation of actin filament length	3/9	180/18670	0.000871841737342674	SPTAN1/SPTBN1/SPTB
BP	GO:0030041	actin filament polymerization	3/9	182/18670	0.000871841737342674	SPTAN1/SPTBN1/SPTB
BP	GO:0008154	actin polymerization or depolymerization	3/9	209/18670	0.00126915187191727	SPTAN1/SPTBN1/SPTB
BP	GO:0098901	regulation of cardiac muscle cell action potential	2/9	34/18670	0.00127608011965234	JUP/ANK3
BP	GO:0043624	cellular protein complex disassembly	3/9	217/18670	0.001302104154093	SPTAN1/SPTBN1/SPTB
BP	GO:0032271	regulation of protein polymerization	3/9	218/18670	0.001302104154093	SPTAN1/SPTBN1/SPTB
BP	GO:0071709	membrane assembly	2/9	36/18670	0.001302104154093	ANK3/SPTBN1
BP	GO:0043001	Golgi to plasma membrane protein transport	2/9	39/18670	0.00148536288048294	ANK3/SPTBN1
BP	GO:0044091	membrane biogenesis	2/9	41/18670	0.00155842124406731	ANK3/SPTBN1
BP	GO:0072659	protein localization to plasma membrane	3/9	260/18670	0.00186802728342571	JUP/ANK3/SPTBN1
BP	GO:0110053	regulation of actin filament organization	3/9	261/18670	0.00186802728342571	SPTAN1/SPTBN1/SPTB
BP	GO:0007411	axon guidance	3/9	276/18670	0.00211459672862706	SPTAN1/SPTBN1/SPTB
BP	GO:0097485	neuron projection guidance	3/9	277/18670	0.00211459672862706	SPTAN1/SPTBN1/SPTB
BP	GO:0051258	protein polymerization	3/9	283/18670	0.00219730897259354	SPTAN1/SPTBN1/SPTB
BP	GO:0098900	regulation of action potential	2/9	55/18670	0.00234430071684009	JUP/ANK3
BP	GO:0061951	establishment of protein localization to plasma membrane	2/9	58/18670	0.00254829443682672	ANK3/SPTBN1
BP	GO:0006893	Golgi to plasma membrane transport	2/9	63/18670	0.00285174902048725	ANK3/SPTBN1
BP	GO:1903829	positive regulation of cellular protein localization	3/9	324/18670	0.00285174902048725	JUP/ANK3/SPTBN1
BP	GO:0032984	protein-containing complex disassembly	3/9	329/18670	0.00292047816490996	SPTAN1/SPTBN1/SPTB
BP	GO:0032956	regulation of actin cytoskeleton organization	3/9	343/18670	0.00323204446179259	SPTAN1/SPTBN1/SPTB
BP	GO:1902903	regulation of supramolecular fiber organization	3/9	352/18670	0.00341661158021857	SPTAN1/SPTBN1/SPTB
BP	GO:0000281	mitotic cytokinesis	2/9	73/18670	0.00344302283627456	ANK3/SPTBN1
BP	GO:0032507	maintenance of protein location in cell	2/9	74/18670	0.00344302283627456	JUP/ANK3
BP	GO:0086001	cardiac muscle cell action potential	2/9	74/18670	0.00344302283627456	JUP/ANK3
BP	GO:0032535	regulation of cellular component size	3/9	370/18670	0.00365954621094151	SPTAN1/SPTBN1/SPTB
BP	GO:0010639	negative regulation of organelle organization	3/9	395/18670	0.00434734521185598	SPTAN1/SPTBN1/SPTB
BP	GO:0007015	actin filament organization	3/9	400/18670	0.00442894049731962	SPTAN1/SPTBN1/SPTB
BP	GO:0051222	positive regulation of protein transport	3/9	418/18670	0.00494535668196608	JUP/ANK3/SPTBN1
BP	GO:0051651	maintenance of location in cell	2/9	95/18670	0.0051737192049908	JUP/ANK3
BP	GO:0098876	vesicle-mediated transport to the plasma membrane	2/9	96/18670	0.00519294291152673	ANK3/SPTBN1
BP	GO:0061640	cytoskeleton-dependent cytokinesis	2/9	100/18670	0.00553757965395674	ANK3/SPTBN1
BP	GO:0006892	post-Golgi vesicle-mediated transport	2/9	104/18670	0.00571920068833148	ANK3/SPTBN1
BP	GO:1904951	positive regulation of establishment of protein localization	3/9	456/18670	0.00571920068833148	JUP/ANK3/SPTBN1
BP	GO:0007009	plasma membrane organization	2/9	105/18670	0.00571920068833148	ANK3/SPTBN1
BP	GO:0045185	maintenance of protein location	2/9	105/18670	0.00571920068833148	JUP/ANK3
BP	GO:0043254	regulation of protein complex assembly	3/9	467/18670	0.00598023876548952	SPTAN1/SPTBN1/SPTB
BP	GO:0043312	neutrophil degranulation	3/9	485/18670	0.00656988809645597	JUP/VCL/SPTAN1
BP	GO:0002283	neutrophil activation involved in immune response	3/9	488/18670	0.00658809364540748	JUP/VCL/SPTAN1
BP	GO:0042119	neutrophil activation	3/9	498/18670	0.00682212840505899	JUP/VCL/SPTAN1
BP	GO:0002446	neutrophil mediated immunity	3/9	499/18670	0.00682212840505899	JUP/VCL/SPTAN1
BP	GO:1905477	positive regulation of protein localization to membrane	2/9	122/18670	0.00703869590211955	ANK3/SPTBN1
BP	GO:0001508	action potential	2/9	133/18670	0.0082303176744677	JUP/ANK3
BP	GO:0090316	positive regulation of intracellular protein transport	2/9	153/18670	0.0106973862463666	JUP/ANK3
BP	GO:0000910	cytokinesis	2/9	171/18670	0.0131292591371332	ANK3/SPTBN1
BP	GO:1905475	regulation of protein localization to membrane	2/9	187/18670	0.015434799322669	ANK3/SPTBN1
BP	GO:0035637	multicellular organismal signaling	2/9	204/18670	0.0180548637290068	JUP/ANK3
BP	GO:0032388	positive regulation of intracellular transport	2/9	215/18670	0.0197411042816512	JUP/ANK3
BP	GO:0002934	desmosome organization	1/9	10/18670	0.0207514502867805	JUP
BP	GO:0007160	cell-matrix adhesion	2/9	225/18670	0.0207514502867805	JUP/VCL
BP	GO:0033157	regulation of intracellular protein transport	2/9	225/18670	0.0207514502867805	JUP/ANK3
BP	GO:0010649	regulation of cell communication by electrical coupling	1/9	12/18670	0.0228781494232262	ANK3
BP	GO:0010960	magnesium ion homeostasis	1/9	12/18670	0.0228781494232262	ANK3
BP	GO:0035330	regulation of hippo signaling	1/9	12/18670	0.0228781494232262	MARK3
BP	GO:0045760	positive regulation of action potential	1/9	12/18670	0.0228781494232262	ANK3
BP	GO:1904181	positive regulation of membrane depolarization	1/9	12/18670	0.0228781494232262	ANK3
BP	GO:0019896	axonal transport of mitochondrion	1/9	13/18670	0.0244878318222597	TRAK1
BP	GO:0086069	bundle of His cell to Purkinje myocyte communication	1/9	14/18670	0.0260592834816216	JUP
BP	GO:0035635	entry of bacterium into host cell	1/9	15/18670	0.0269737370879461	CTNND1
BP	GO:0045838	positive regulation of membrane potential	1/9	15/18670	0.0269737370879461	ANK3
BP	GO:1902260	negative regulation of delayed rectifier potassium channel activity	1/9	15/18670	0.0269737370879461	ANK3
BP	GO:2000651	positive regulation of sodium ion transmembrane transporter activity	1/9	16/18670	0.0284462043866853	ANK3
BP	GO:0060828	regulation of canonical Wnt signaling pathway	2/9	286/18670	0.0286930766532619	JUP/CTNND1
BP	GO:0048311	mitochondrion distribution	1/9	17/18670	0.0295607150763085	TRAK1
BP	GO:0032026	response to magnesium ion	1/9	19/18670	0.0323216539240411	ANK3
BP	GO:0098911	regulation of ventricular cardiac muscle cell action potential	1/9	19/18670	0.0323216539240411	JUP
BP	GO:1902307	positive regulation of sodium ion transmembrane transport	1/9	21/18670	0.0343738148003588	ANK3
BP	GO:1903817	negative regulation of voltage-gated potassium channel activity	1/9	21/18670	0.0343738148003588	ANK3
BP	GO:0051235	maintenance of location	2/9	330/18670	0.0343738148003588	JUP/ANK3
BP	GO:0090150	establishment of protein localization to membrane	2/9	332/18670	0.0343738148003588	ANK3/SPTBN1
BP	GO:0047497	mitochondrion transport along microtubule	1/9	22/18670	0.0343738148003588	TRAK1
BP	GO:0060390	regulation of SMAD protein signal transduction	1/9	22/18670	0.0343738148003588	SPTBN1
BP	GO:0030336	negative regulation of cell migration	2/9	334/18670	0.0343738148003588	JUP/VCL
BP	GO:0060070	canonical Wnt signaling pathway	2/9	335/18670	0.0343738148003588	JUP/CTNND1
BP	GO:0086012	membrane depolarization during cardiac muscle cell action potential	1/9	23/18670	0.034997287051171	ANK3
BP	GO:1902259	regulation of delayed rectifier potassium channel activity	1/9	23/18670	0.034997287051171	ANK3
BP	GO:2000146	negative regulation of cell motility	2/9	349/18670	0.0361283516342782	JUP/VCL
BP	GO:0031589	cell-substrate adhesion	2/9	354/18670	0.036628858166636	JUP/VCL
BP	GO:0034110	regulation of homotypic cell-cell adhesion	1/9	25/18670	0.036628858166636	ANK3
BP	GO:0051654	establishment of mitochondrion localization	1/9	25/18670	0.036628858166636	TRAK1
BP	GO:0006936	muscle contraction	2/9	360/18670	0.0369450107794143	JUP/VCL
BP	GO:0030111	regulation of Wnt signaling pathway	2/9	363/18670	0.0371977831591094	JUP/CTNND1
BP	GO:0051271	negative regulation of cellular component movement	2/9	384/18670	0.0405911271238143	JUP/VCL
BP	GO:0010644	cell communication by electrical coupling	1/9	29/18670	0.0405911271238143	ANK3
BP	GO:1901017	negative regulation of potassium ion transmembrane transporter activity	1/9	29/18670	0.0405911271238143	ANK3
BP	GO:0032743	positive regulation of interleukin-2 production	1/9	30/18670	0.0412580085726334	SPTBN1
BP	GO:0090314	positive regulation of protein targeting to membrane	1/9	30/18670	0.0412580085726334	ANK3
BP	GO:0040013	negative regulation of locomotion	2/9	396/18670	0.0416617185059886	JUP/VCL
BP	GO:0045785	positive regulation of cell adhesion	2/9	403/18670	0.0427087992315619	JUP/ANK3
BP	GO:1901380	negative regulation of potassium ion transmembrane transport	1/9	33/18670	0.0442112802080737	ANK3
BP	GO:0010765	positive regulation of sodium ion transport	1/9	34/18670	0.0447885192382355	ANK3
BP	GO:0019228	neuronal action potential	1/9	34/18670	0.0447885192382355	ANK3
BP	GO:0032386	regulation of intracellular transport	2/9	423/18670	0.0452879332207017	JUP/ANK3
BP	GO:0090313	regulation of protein targeting to membrane	1/9	36/18670	0.0461106052545473	ANK3
BP	GO:0006605	protein targeting	2/9	432/18670	0.0461106052545473	ANK3/TRAK1
BP	GO:0042391	regulation of membrane potential	2/9	434/18670	0.0461106052545473	JUP/ANK3
BP	GO:0042307	positive regulation of protein import into nucleus	1/9	37/18670	0.0461106052545473	JUP
BP	GO:0086010	membrane depolarization during action potential	1/9	37/18670	0.0461106052545473	ANK3
BP	GO:0010256	endomembrane system organization	2/9	438/18670	0.0461106052545473	ANK3/SPTBN1
BP	GO:0035329	hippo signaling	1/9	38/18670	0.0461969893556355	MARK3
BP	GO:0086005	ventricular cardiac muscle cell action potential	1/9	38/18670	0.0461969893556355	JUP
BP	GO:0086091	regulation of heart rate by cardiac conduction	1/9	38/18670	0.0461969893556355	JUP
BP	GO:1904591	positive regulation of protein import	1/9	39/18670	0.0470434442344523	JUP
BP	GO:0043267	negative regulation of potassium ion transport	1/9	41/18670	0.049063077374553	ANK3
BP	GO:0003012	muscle system process	2/9	465/18670	0.0493150259053969	JUP/VCL
CC	GO:0014704	intercalated disc	3/9	50/19717	3.15490463499755e-05	JUP/VCL/ANK3
CC	GO:0035580	specific granule lumen	3/9	62/19717	3.15490463499755e-05	JUP/VCL/SPTAN1
CC	GO:0005916	fascia adherens	2/9	10/19717	7.48695718924017e-05	JUP/VCL
CC	GO:0033267	axon part	4/9	382/19717	0.000115383835353743	ANK3/SPTBN1/TRAK1/CTNND1
CC	GO:0043296	apical junction complex	3/9	143/19717	0.000187245325560132	JUP/ANK3/CTNND1
CC	GO:0042581	specific granule	3/9	160/19717	0.000225005991378644	JUP/VCL/SPTAN1
CC	GO:0016342	catenin complex	2/9	29/19717	0.000373587768384337	JUP/CTNND1
CC	GO:0034774	secretory granule lumen	3/9	321/19717	0.00143099167926697	JUP/VCL/SPTAN1
CC	GO:0060205	cytoplasmic vesicle lumen	3/9	338/19717	0.00153330950460562	JUP/VCL/SPTAN1
CC	GO:0031983	vesicle lumen	3/9	339/19717	0.00153330950460562	JUP/VCL/SPTAN1
CC	GO:0044304	main axon	2/9	68/19717	0.00155765176407183	ANK3/SPTBN1
CC	GO:1904813	ficolin-1-rich granule lumen	2/9	124/19717	0.00493995210268826	JUP/VCL
CC	GO:0009898	cytoplasmic side of plasma membrane	2/9	154/19717	0.00653224225194352	JUP/SPTB
CC	GO:0019897	extrinsic component of plasma membrane	2/9	165/19717	0.00723306356755589	JUP/CTNND1
CC	GO:0030426	growth cone	2/9	171/19717	0.00750898742487534	TRAK1/CTNND1
CC	GO:0030427	site of polarized growth	2/9	176/19717	0.00763232183636543	TRAK1/CTNND1
CC	GO:0098562	cytoplasmic side of membrane	2/9	178/19717	0.00763232183636543	JUP/SPTB
CC	GO:0101002	ficolin-1-rich granule	2/9	185/19717	0.00799037660190812	JUP/VCL
CC	GO:0030673	axolemma	1/9	14/19717	0.016389241681745	SPTBN1
CC	GO:0033268	node of Ranvier	1/9	15/19717	0.0170497385138886	ANK3
CC	GO:0150034	distal axon	2/9	285/19717	0.0170497385138886	TRAK1/CTNND1
CC	GO:0098831	presynaptic active zone cytoplasmic component	1/9	16/19717	0.0172448371251773	CTNND1
CC	GO:0019898	extrinsic component of membrane	2/9	295/19717	0.0172914146917787	JUP/CTNND1
CC	GO:0016327	apicolateral plasma membrane	1/9	18/19717	0.0179736058564987	JUP
CC	GO:0014069	postsynaptic density	2/9	324/19717	0.0188058798882803	SPTBN1/CTNND1
CC	GO:0043194	axon initial segment	1/9	20/19717	0.0188058798882803	ANK3
CC	GO:0032279	asymmetric synapse	2/9	328/19717	0.0188058798882803	SPTBN1/CTNND1
CC	GO:0030057	desmosome	1/9	25/19717	0.0208580680208418	JUP
CC	GO:0031430	M band	1/9	28/19717	0.0224312705346366	SPTBN1
CC	GO:0044295	axonal growth cone	1/9	28/19717	0.0224312705346366	TRAK1
CC	GO:0002102	podosome	1/9	30/19717	0.0228543220022317	VCL
CC	GO:0009925	basal plasma membrane	1/9	34/19717	0.0239215191852615	ANK3
CC	GO:0098686	hippocampal mossy fiber to CA3 synapse	1/9	34/19717	0.0239215191852615	CTNND1
CC	GO:0031672	A band	1/9	39/19717	0.0269469959860925	SPTBN1
CC	GO:0099738	cell cortex region	1/9	42/19717	0.0285188359939451	CTNND1
CC	GO:0045178	basal part of cell	1/9	51/19717	0.0340002600989589	ANK3
CC	GO:0030315	T-tubule	1/9	52/19717	0.0341008797553657	ANK3
CC	GO:1904724	tertiary granule lumen	1/9	55/19717	0.0354741648658452	SPTAN1
CC	GO:0032589	neuron projection membrane	1/9	57/19717	0.0356185001597194	SPTBN1
CC	GO:1904115	axon cytoplasm	1/9	57/19717	0.0356185001597194	TRAK1
CC	GO:0001533	cornified envelope	1/9	65/19717	0.0399374219570681	JUP
CC	GO:0048786	presynaptic active zone	1/9	71/19717	0.0422894976530811	CTNND1
CC	GO:0031594	neuromuscular junction	1/9	76/19717	0.0445664538725005	ANK3
CC	GO:0016528	sarcoplasm	1/9	80/19717	0.046204467407103	ANK3
CC	GO:0098685	Schaffer collateral - CA1 synapse	1/9	82/19717	0.0466736500422472	CTNND1
CC	GO:0120111	neuron projection cytoplasm	1/9	84/19717	0.0471289000699107	TRAK1
MF	GO:0005200	structural constituent of cytoskeleton	4/9	102/17697	1.28184393883771e-06	ANK3/SPTAN1/SPTBN1/SPTB
MF	GO:0045294	alpha-catenin binding	2/9	10/17697	7.74310372871186e-05	JUP/VCL
MF	GO:0030506	ankyrin binding	2/9	20/17697	0.000217379839569926	SPTBN1/SPTB
MF	GO:0005516	calmodulin binding	2/9	200/17697	0.0186094119449739	SPTAN1/SPTBN1
MF	GO:0002162	dystroglycan binding	1/9	10/17697	0.0190322725901344	VCL
MF	GO:0086080	protein binding involved in heterotypic cell-cell adhesion	1/9	13/17697	0.0219779435471797	JUP
MF	GO:0050811	GABA receptor binding	1/9	17/17697	0.0258429814897688	TRAK1
MF	GO:0050321	tau-protein kinase activity	1/9	22/17697	0.030369184500155	MARK3
MF	GO:0030507	spectrin binding	1/9	28/17697	0.0353827325319173	ANK3
KEGG	hsa04520	Adherens junction	2/5	71/8037	0.0105895	VCL/CTNND1
KEGG	hsa04670	Leukocyte transendothelial migration	2/5	113/8037	0.0133419	VCL/CTNND1
