# Supplementary material for: The landscape of alternative splicing reveals novel events associated with tumorigenesis and the immune microenvironment in gastric cancer
Source: Aging (Albany NY). 2021 Jan 10;13(3):4317–34. doi: 10.18632/aging.202393 (PMC7906195; doi:10.18632/aging.202393)
Supplement: Supplementary Table 10 [file aging-13-202393-s011.xlsx]

## Sheet: Sheet1
Table S10. Spearman correlation analysis of DEAS events and SFs
DEAS	SF_ID	cor	Adjusted P-value
LRRFIP1-58133-ES	ENSG00000112183	0.701175	4.86144e-42
LAS1L-89320-AD	ENSG00000011304	-0.699043	5.91841e-42
ATP2B4-9450-ES	ENSG00000112183	0.673953	7.97169e-38
VCL-12254-ES	ENSG00000112183	0.664629	1.86304e-36
MLTK-55999-AT	ENSG00000100320	-0.663153	2.5395e-36
SPAG9-42494-ES	ENSG00000048740	0.652487	9.12715e-35
MARK3-29448-ES	ENSG00000100320	0.6497	2.04034e-34
MARK3-29450-ES	ENSG00000100320	0.644205	1.14781e-33
PLEKHA1-13355-ES	ENSG00000048740	0.640414	3.60341e-33
TMEM184B-62226-ES	ENSG00000112183	0.63664	1.1191e-32
MARK3-29448-ES	ENSG00000048740	0.633677	2.65828e-32
SPAG9-42494-ES	ENSG00000100320	0.633578	2.51569e-32
CLSTN1-576-ES	ENSG00000048740	0.632746	3.03553e-32
MTMR1-90356-ES	ENSG00000048740	0.62732	1.58359e-31
ZNF160-51649-AP	ENSG00000119707	0.62595	2.27354e-31
SEPT9-43715-AP	ENSG00000048740	0.625708	2.29901e-31
CLSTN1-576-ES	ENSG00000112183	0.624554	3.10323e-31
TPM1-30980-AP	ENSG00000100320	-0.620595	9.9844e-31
TNS1-57434-ES	ENSG00000112183	0.610081	2.25612e-29
SVIL-11114-ES	ENSG00000112183	0.609283	2.71381e-29
MARK3-29448-ES	ENSG00000112183	0.606363	6.09351e-29
SSFA2-56438-AP	ENSG00000161547	0.604771	9.2494e-29
MAP2K7-47194-ES	ENSG00000100320	0.604602	9.29141e-29
LAS1L-89320-AD	ENSG00000104824	-0.60443	9.36173e-29
CLSTN1-575-ES	ENSG00000048740	0.604283	9.3786e-29
SEPT9-43715-AP	ENSG00000112183	0.602218	1.63779e-28
LAS1L-89320-AD	ENSG00000003756	0.601613	1.87681e-28
NFYA-76094-ES	ENSG00000100320	0.600848	2.25439e-28
CLSTN1-575-ES	ENSG00000100320	0.598052	4.83108e-28
NSFL1C-58506-ES	ENSG00000112183	0.597935	4.82667e-28
MYO18A-40038-ES	ENSG00000100320	0.59783	4.81267e-28
LETMD1-21745-AD	ENSG00000119707	0.597249	5.49566e-28
SPAG9-42494-ES	ENSG00000112183	0.596464	6.65296e-28
TMEM184B-62226-ES	ENSG00000048740	0.595615	8.20168e-28
PTPRF-2189-ES	ENSG00000112183	0.594963	9.57112e-28
ATP2B4-9450-ES	ENSG00000167281	0.594679	1.00768e-27
TPM1-30980-AP	ENSG00000048740	-0.594349	1.07526e-27
DIXDC1-18708-AP	ENSG00000112183	-0.593834	1.20941e-27
CLSTN1-575-ES	ENSG00000112183	0.593569	1.26911e-27
NFYA-76094-ES	ENSG00000048740	0.592877	1.50086e-27
TEAD1-14436-ES	ENSG00000048740	0.590705	2.67607e-27
RGMB-72881-AP	ENSG00000112183	0.590106	3.08213e-27
SVIL-11113-ES	ENSG00000112183	0.586677	7.7127e-27
SPOP-42303-AP	ENSG00000167281	0.584403	1.39795e-26
ELK4-9560-AT	ENSG00000161547	0.582457	2.3106e-26
SPTBN1-53576-AP	ENSG00000048740	0.581803	2.69422e-26
SSFA2-56438-AP	ENSG00000188529	0.581525	2.84099e-26
TNS1-57433-ES	ENSG00000112183	0.581467	2.82486e-26
LETMD1-21745-AD	ENSG00000153914	0.580195	3.88844e-26
SVIL-11114-ES	ENSG00000167281	0.58019	3.81493e-26
CXCL12-11342-AT	ENSG00000135829	0.579991	3.94489e-26
MARK3-29450-ES	ENSG00000048740	0.579915	3.94819e-26
CAMK2G-12249-ES	ENSG00000112183	0.57948	4.34873e-26
TPM1-30980-AP	ENSG00000112183	-0.579026	4.8162e-26
PLEKHA1-13355-ES	ENSG00000112183	0.577291	7.48617e-26
DACT3-50576-AT	ENSG00000161547	0.576384	9.33761e-26
NSFL1C-58506-ES	ENSG00000100320	0.576102	9.88052e-26
MAP2K7-47194-ES	ENSG00000112183	0.575119	1.25695e-25
DMD-88768-AP	ENSG00000112183	0.575023	1.26727e-25
TGFBR3-3741-AP	ENSG00000161547	0.574254	1.52397e-25
DACT3-50576-AT	ENSG00000100320	-0.573031	2.06184e-25
CDIP1-33755-AP	ENSG00000136450	-0.572962	2.06508e-25
ZNF483-87210-AT	ENSG00000115875	-0.572839	2.09851e-25
VCL-12254-ES	ENSG00000167281	0.571908	2.63069e-25
PCYOX1-53879-AP	ENSG00000119707	0.569917	4.33199e-25
MLTK-55999-AT	ENSG00000048740	-0.569913	4.27134e-25
ZNF160-51649-AP	ENSG00000153914	0.568791	5.61345e-25
TTC7B-28826-ES	ENSG00000100320	0.568583	5.83411e-25
LRRFIP1-58133-ES	ENSG00000048740	0.567963	6.73877e-25
MYO18A-40038-ES	ENSG00000048740	0.567781	6.95905e-25
LAS1L-89321-ES	ENSG00000048740	0.567015	8.34222e-25
ZNF106-30163-AP	ENSG00000048740	0.567012	8.23189e-25
PDE8B-72564-AP	ENSG00000161547	-0.566994	8.15713e-25
MLTK-55999-AT	ENSG00000112183	-0.565549	1.16216e-24
SOGA2-44582-ES	ENSG00000112183	0.564543	1.47943e-24
DMD-88772-ES	ENSG00000048740	0.56358	1.86125e-24
MYO18A-40038-ES	ENSG00000112183	0.563503	1.87352e-24
LAS1L-89320-AD	ENSG00000182872	-0.563184	2.00394e-24
LETMD1-21757-ES	ENSG00000119707	0.562605	2.28832e-24
MARK3-29450-ES	ENSG00000112183	0.562032	2.60944e-24
TMEM189-59770-AP	ENSG00000111786	-0.561716	2.78976e-24
LRRFIP1-58133-ES	ENSG00000167281	0.561591	2.84283e-24
SPOP-42303-AP	ENSG00000111786	-0.560398	3.78385e-24
MTMR3-61690-ES	ENSG00000048740	0.560068	4.05945e-24
POMGNT1-2783-AP	ENSG00000112183	0.559918	4.16436e-24
SPTBN1-53576-AP	ENSG00000136450	-0.559659	4.38988e-24
PDE8B-72564-AP	ENSG00000100320	0.558965	5.15562e-24
NSFL1C-58506-ES	ENSG00000048740	0.558572	5.61892e-24
DAB2IP-87442-AP	ENSG00000100320	0.558549	5.5879e-24
CLSTN1-576-ES	ENSG00000100320	0.558372	5.77294e-24
LAS1L-89321-ES	ENSG00000152601	0.557757	6.64719e-24
PDE8B-72564-AP	ENSG00000048740	0.555946	1.02722e-23
MTMR3-61690-ES	ENSG00000112183	0.554861	1.32562e-23
RAD54B-84556-AT	ENSG00000054118	0.553995	1.62047e-23
TGFBR3-3741-AP	ENSG00000119707	0.552716	2.18941e-23
MARK3-29450-ES	ENSG00000113391	0.550225	3.95799e-23
SPAG9-42494-ES	ENSG00000113391	0.549797	4.34219e-23
CAMK2G-12249-ES	ENSG00000100320	0.549424	4.70085e-23
SPTBN1-53576-AP	ENSG00000112183	0.548268	6.13962e-23
CAB39L-25883-AP	ENSG00000167281	-0.547752	6.8762e-23
CD99-98274-ES	ENSG00000112183	0.547275	7.6298e-23
COL6A3-58104-ES	ENSG00000136450	0.545527	1.14489e-22
VCL-12254-ES	ENSG00000048740	0.544766	1.3577e-22
ZNF106-30163-AP	ENSG00000112183	0.543399	1.85664e-22
FBLN2-63511-ES	ENSG00000048740	0.543312	1.877e-22
LRRFIP1-58133-ES	ENSG00000100320	0.542883	2.05631e-22
COL12A1-76773-ES	ENSG00000048740	-0.54116	3.05073e-22
MARK3-29448-ES	ENSG00000113391	0.540723	3.3476e-22
PAAF1-17744-ES	ENSG00000112183	0.540531	3.46883e-22
DMD-88772-ES	ENSG00000112183	0.540458	3.49608e-22
MARK3-29448-ES	ENSG00000136450	-0.54017	3.70535e-22
CAB39L-25883-AP	ENSG00000112183	-0.538863	4.97489e-22
DMPK-50519-AP	ENSG00000161547	0.537561	6.66478e-22
SNX11-42174-ES	ENSG00000119707	0.537034	7.46013e-22
LAS1L-89320-AD	ENSG00000121774	-0.536566	8.23819e-22
DMD-88772-ES	ENSG00000136450	-0.536362	8.55933e-22
TEAD1-14436-ES	ENSG00000112183	0.536323	8.56253e-22
DACT3-50576-AT	ENSG00000188529	0.535863	9.43689e-22
PCYOX1-53879-AP	ENSG00000153914	0.535543	1.00705e-21
ZNF483-87210-AT	ENSG00000112081	-0.53402	1.41477e-21
ANGPT1-84859-AP	ENSG00000100320	-0.533639	1.5303e-21
TMEM189-59770-AP	ENSG00000112183	0.533534	1.55467e-21
DMD-88772-ES	ENSG00000100320	0.53352	1.5468e-21
DAB2IP-87442-AP	ENSG00000112183	0.533459	1.55593e-21
SYNE2-27846-ES	ENSG00000100320	0.532901	1.75263e-21
ZNF106-30163-AP	ENSG00000113391	0.532203	2.03722e-21
SEPT9-43715-AP	ENSG00000136450	-0.531878	2.17553e-21
LEPR-3295-AT	ENSG00000113391	0.531864	2.16553e-21
SVIL-11113-ES	ENSG00000167281	0.531601	2.28041e-21
SEPT9-43715-AP	ENSG00000154548	0.531272	2.43807e-21
MICAL3-61016-ES	ENSG00000112183	0.530393	2.95036e-21
LETMD1-21747-ES	ENSG00000119707	0.529559	3.53282e-21
LETMD1-21747-ES	ENSG00000153914	0.529122	3.86827e-21
TNS1-57434-ES	ENSG00000167281	0.528818	4.10997e-21
COL12A1-76773-ES	ENSG00000112183	-0.528258	4.62552e-21
LEPR-3295-AT	ENSG00000152601	0.527306	5.67981e-21
TTC7B-28826-ES	ENSG00000113391	0.52653	6.70315e-21
MAP2K7-47194-ES	ENSG00000048740	0.526485	6.72134e-21
SPOP-42303-AP	ENSG00000011304	-0.526238	7.05028e-21
SFMBT1-65289-AP	ENSG00000161547	-0.525044	9.12439e-21
FLNA-90565-ES	ENSG00000112183	-0.524704	9.76655e-21
TNS1-57434-ES	ENSG00000048740	0.522776	1.48371e-20
PIWIL4-18358-AP	ENSG00000153914	0.522093	1.71172e-20
DIXDC1-18708-AP	ENSG00000048740	-0.521989	1.73898e-20
FBLN2-63511-ES	ENSG00000112183	0.52194	1.74563e-20
SPTBN1-53576-AP	ENSG00000135482	0.521026	2.11798e-20
CD99-98274-ES	ENSG00000100320	0.520751	2.23389e-20
MLTK-55999-AT	ENSG00000113391	-0.52039	2.40036e-20
DMD-88768-AP	ENSG00000048740	0.519831	2.69316e-20
SOGA2-44582-ES	ENSG00000167281	0.5193	3.0025e-20
TTC7B-28826-ES	ENSG00000112183	0.517872	4.06555e-20
LRRFIP1-58137-ES	ENSG00000112183	0.517606	4.27772e-20
COL12A1-76773-ES	ENSG00000100320	-0.517296	4.54424e-20
DAB2IP-87442-AP	ENSG00000048740	0.516866	4.95394e-20
SLC4A7-63783-ES	ENSG00000112183	0.516265	5.60121e-20
PLCD1-64009-AP	ENSG00000154548	0.516079	5.79238e-20
SPOP-42303-AP	ENSG00000112183	0.515897	5.98505e-20
SPAG9-42494-ES	ENSG00000136450	-0.515562	6.39155e-20
ITGB4-43489-ES	ENSG00000112183	0.515241	6.80369e-20
MTMR3-61690-ES	ENSG00000100320	0.515208	6.80961e-20
LAS1L-89321-ES	ENSG00000100320	0.515127	6.88625e-20
TMEM189-59770-AP	ENSG00000167281	0.514998	7.03594e-20
SVIL-11113-ES	ENSG00000048740	0.514962	7.04552e-20
SLC4A7-63783-ES	ENSG00000167281	0.514942	7.03379e-20
SPTBN1-53576-AP	ENSG00000154548	0.514817	7.17968e-20
NFYA-76094-ES	ENSG00000113391	0.514392	7.81584e-20
PLEKHA1-13355-ES	ENSG00000152601	0.514314	7.90099e-20
ZNF483-87210-AT	ENSG00000113391	0.51362	9.10757e-20
TTC7B-28826-ES	ENSG00000048740	0.513287	9.7195e-20
SPAG9-42494-ES	ENSG00000152601	0.512279	1.19736e-19
RPL32-63468-RI	ENSG00000136450	0.511974	1.26999e-19
PCYOX1-53879-AP	ENSG00000161547	0.511596	1.36796e-19
ANGPT1-84859-AP	ENSG00000048740	-0.51125	1.46327e-19
DMD-88768-AP	ENSG00000100320	0.511114	1.4976e-19
VCL-12254-ES	ENSG00000136450	-0.510817	1.58556e-19
IDUA-68439-AP	ENSG00000119707	0.509974	1.8832e-19
SFMBT1-65289-AP	ENSG00000048740	0.509651	2.00449e-19
TBC1D1-69017-ES	ENSG00000112183	0.509389	2.10651e-19
PTPRF-2189-ES	ENSG00000100320	0.509311	2.12923e-19
DIXDC1-18708-AP	ENSG00000136450	0.509185	2.17401e-19
COL6A3-58104-ES	ENSG00000048740	-0.508625	2.43197e-19
ZNF106-30163-AP	ENSG00000100320	0.508552	2.45605e-19
SMAD6-31294-AP	ENSG00000161547	0.508075	2.69921e-19
SPTBN1-53576-AP	ENSG00000113391	0.50773	2.88545e-19
TMEM189-59770-AP	ENSG00000011304	-0.507111	3.2667e-19
ELK4-9560-AT	ENSG00000157540	-0.506628	3.59328e-19
SVIL-11114-ES	ENSG00000048740	0.506614	3.58486e-19
PLEKHM3-57206-AT	ENSG00000161547	0.506108	3.96201e-19
NFYA-76094-ES	ENSG00000112183	0.505913	4.10385e-19
DIXDC1-18708-AP	ENSG00000113391	-0.505612	4.34621e-19
CLSTN1-576-ES	ENSG00000167281	0.504622	5.30841e-19
COL12A1-76773-ES	ENSG00000113391	-0.504547	5.36397e-19
FLNA-90565-ES	ENSG00000167281	-0.503059	7.25466e-19
ELK4-9560-AT	ENSG00000112081	0.502554	8.00804e-19
PIWIL4-18358-AP	ENSG00000119707	0.502485	8.0811e-19
TMEM184B-62226-ES	ENSG00000113391	0.501524	9.79286e-19
FBLN2-63511-ES	ENSG00000113391	0.500332	1.24346e-18
PTPRF-2189-ES	ENSG00000048740	0.499856	1.36328e-18
LAS1L-89321-ES	ENSG00000112183	0.499728	1.39229e-18
SMAD6-31294-AP	ENSG00000129245	-0.499493	1.45319e-18
DIXDC1-18708-AP	ENSG00000100320	-0.498749	1.68234e-18
SMIM7-48183-AT	ENSG00000161547	0.4987	1.6906e-18
SOGA2-44582-ES	ENSG00000048740	0.498605	1.71522e-18
LAS1L-89320-AD	ENSG00000100201	0.498129	1.87993e-18
MAP2K7-47194-ES	ENSG00000136450	-0.497897	1.96061e-18
DMD-88772-ES	ENSG00000113391	0.497814	1.98422e-18
CAB39L-25883-AP	ENSG00000136450	0.497715	2.01474e-18
PAAF1-17744-ES	ENSG00000048740	0.497091	2.27441e-18
ACPL2-67056-AP	ENSG00000119707	0.496626	2.48667e-18
TNS1-57433-ES	ENSG00000167281	0.496625	2.47515e-18
MYO18A-40038-ES	ENSG00000136450	-0.496125	2.72469e-18
FLNA-90565-ES	ENSG00000048740	-0.495873	2.85286e-18
VCL-12254-ES	ENSG00000113391	0.495579	3.01219e-18
SVIL-11114-ES	ENSG00000113391	0.49555	3.01554e-18
PCDH7-68993-AT	ENSG00000112183	-0.494822	3.47426e-18
PCDH7-68993-AT	ENSG00000161547	0.494375	3.78239e-18
FAM72A-9577-AT	ENSG00000136450	-0.494202	3.89695e-18
ELK4-9560-AT	ENSG00000100320	-0.494165	3.90798e-18
TPM1-31008-AA	ENSG00000112183	-0.494062	3.97117e-18
NTM-19520-AP	ENSG00000135829	-0.493928	4.06086e-18
DMPK-50519-AP	ENSG00000188529	0.493875	4.08507e-18
TPM1-30980-AP	ENSG00000167281	-0.493794	4.13329e-18
EPB41L2-77596-ES	ENSG00000100320	0.493766	4.13803e-18
MARK3-29448-ES	ENSG00000152601	0.493724	4.15453e-18
MLTK-55999-AT	ENSG00000152601	-0.493549	4.28313e-18
ZNF483-87210-AT	ENSG00000161547	-0.492529	5.22477e-18
LEPR-3295-AT	ENSG00000100320	0.49247	5.26369e-18
CAMK2G-12249-ES	ENSG00000048740	0.492385	5.32991e-18
TNS1-57434-ES	ENSG00000136450	-0.492306	5.39125e-18
TGFBR3-3741-AP	ENSG00000153914	0.492206	5.47468e-18
ZNF483-87210-AT	ENSG00000154548	0.491561	6.19671e-18
PDE8B-72564-AP	ENSG00000188529	-0.491467	6.28514e-18
SLC25A16-11952-ES	ENSG00000153914	0.491149	6.66587e-18
COL12A1-76773-ES	ENSG00000161547	0.491054	6.76354e-18
RAD54B-84556-AT	ENSG00000161547	-0.49087	6.98449e-18
ITGB4-43489-ES	ENSG00000048740	0.490405	7.62528e-18
ALDH6A1-28367-AP	ENSG00000161547	0.490388	7.61805e-18
PLEKHA1-13355-ES	ENSG00000100320	0.489784	8.54711e-18
TTC7B-28826-ES	ENSG00000152601	0.489441	9.10634e-18
VCL-12254-ES	ENSG00000011304	-0.488648	1.05998e-17
DMD-88768-AP	ENSG00000152601	0.488606	1.06432e-17
DMD-88772-ES	ENSG00000152601	0.488547	1.07237e-17
ELK4-9560-AT	ENSG00000048740	-0.488532	1.07114e-17
ELK4-9560-AT	ENSG00000113391	-0.488497	1.07399e-17
UNG-24277-AP	ENSG00000116560	0.488401	1.09006e-17
ATP2B4-9450-ES	ENSG00000048740	0.488379	1.09033e-17
MTMR1-90356-ES	ENSG00000152601	0.488229	1.11825e-17
PDE8B-72564-AP	ENSG00000135482	0.487835	1.20326e-17
ZNF106-30163-AP	ENSG00000152601	0.487741	1.22061e-17
AKAP10-39785-ES	ENSG00000119707	0.487723	1.22014e-17
LEPR-3295-AT	ENSG00000048740	0.487623	1.23929e-17
ANGPT1-84859-AP	ENSG00000152601	-0.487314	1.31131e-17
PDE8B-72564-AP	ENSG00000112183	0.48727	1.31734e-17
TMEM189-59770-AP	ENSG00000048740	0.486676	1.47392e-17
SLC25A16-11952-ES	ENSG00000119707	0.486319	1.57391e-17
PLEKHM3-57206-AT	ENSG00000113391	-0.48622	1.59837e-17
PAAF1-17744-ES	ENSG00000100320	0.485129	1.96859e-17
SEPT9-43715-AP	ENSG00000113391	0.485105	1.97018e-17
DIXDC1-18708-AP	ENSG00000152601	-0.48506	1.97965e-17
DACT3-50576-AT	ENSG00000129245	-0.485043	1.97857e-17
CLIP3-49330-AP	ENSG00000100320	-0.484643	2.13019e-17
CXCL12-11342-AT	ENSG00000136450	0.484508	2.17843e-17
SLC4A7-63783-ES	ENSG00000135829	-0.48316	2.81668e-17
LAS1L-89320-AD	ENSG00000153914	0.482872	2.96628e-17
TEAD1-14436-ES	ENSG00000100320	0.482761	3.01908e-17
SLC25A16-11952-ES	ENSG00000129245	-0.482408	3.2189e-17
WNT2B-4198-AP	ENSG00000135482	-0.48125	4.0066e-17
TGFBR3-3741-AP	ENSG00000188529	0.48104	4.15565e-17
WNT2B-4198-AP	ENSG00000048740	-0.480978	4.18914e-17
SPOP-42303-AP	ENSG00000104824	-0.480934	4.20928e-17
SNX11-42174-ES	ENSG00000153914	0.480547	4.51642e-17
COL6A3-58104-ES	ENSG00000113391	-0.480387	4.63995e-17
ITGB4-43489-ES	ENSG00000154548	0.479986	4.99122e-17
DMD-88768-AP	ENSG00000167281	0.479837	5.11644e-17
CLSTN1-575-ES	ENSG00000136450	-0.479728	5.20439e-17
PCYOX1-53879-AP	ENSG00000129245	-0.479585	5.32907e-17
FLNA-90565-ES	ENSG00000113391	-0.479479	5.41796e-17
ASTN2-87367-AP	ENSG00000139767	0.479351	5.5318e-17
ALDH6A1-28367-AP	ENSG00000119707	0.478382	6.62866e-17
POMGNT1-2783-AP	ENSG00000011304	-0.478235	6.79205e-17
PDLIM7-74784-ES	ENSG00000048740	-0.478172	6.849e-17
SEPT9-43715-AP	ENSG00000135482	0.477608	7.59562e-17
TMEM184B-62226-ES	ENSG00000100320	0.477356	7.93905e-17
TNS1-57433-ES	ENSG00000048740	0.477257	8.06072e-17
LAS1L-89321-ES	ENSG00000113391	0.477234	8.06701e-17
SYNE2-27846-ES	ENSG00000112183	0.476727	8.84904e-17
ELK4-9560-AT	ENSG00000115875	0.475988	1.01375e-16
PTPRF-2189-ES	ENSG00000113391	0.47526	1.15867e-16
ASTN2-87367-AP	ENSG00000112183	0.475092	1.19161e-16
MYO18A-40038-ES	ENSG00000113391	0.47492	1.22661e-16
DAB2IP-87442-AP	ENSG00000152601	0.474859	1.23644e-16
DMD-88772-ES	ENSG00000167281	0.474836	1.23748e-16
ZNF483-87210-AT	ENSG00000048740	0.474674	1.27142e-16
ELK4-9560-AT	ENSG00000100201	-0.474659	1.2707e-16
MLTK-55999-AT	ENSG00000161547	0.474528	1.2979e-16
TEAD1-14436-ES	ENSG00000113391	0.474522	1.29504e-16
ALDH6A1-28367-AP	ENSG00000054118	-0.474135	1.38765e-16
SPTBN1-53576-AP	ENSG00000103067	-0.474069	1.40022e-16
CD99-98274-ES	ENSG00000048740	0.473856	1.45248e-16
CAMK2D-70416-ES	ENSG00000112183	0.473791	1.46532e-16
FBLN2-63511-ES	ENSG00000136450	-0.473726	1.47828e-16
ATP2B4-9450-ES	ENSG00000135829	-0.47338	1.57185e-16
MLLT4-78456-ES	ENSG00000100320	0.47326	1.60217e-16
DNMBP-12781-AP	ENSG00000100320	0.472835	1.72862e-16
TMEM184B-62226-ES	ENSG00000167281	0.472815	1.72944e-16
CHN1-56046-AP	ENSG00000112183	0.472545	1.81287e-16
TEAD1-14436-ES	ENSG00000152601	0.472508	1.81936e-16
TGFBR3-3741-AP	ENSG00000100320	-0.47213	1.94589e-16
CLSTN1-576-ES	ENSG00000136450	-0.471864	2.03804e-16
CLSTN1-576-ES	ENSG00000113391	0.471734	2.08112e-16
DACT3-50576-AT	ENSG00000112183	-0.471466	2.18044e-16
EPB41L2-77596-ES	ENSG00000152601	0.471211	2.27892e-16
POMGNT1-2783-AP	ENSG00000100320	0.470528	2.5782e-16
TMEM189-59770-AP	ENSG00000113391	0.470397	2.63282e-16
TMEM184B-62226-ES	ENSG00000136450	-0.470095	2.7757e-16
TEAD1-14436-ES	ENSG00000103067	-0.470082	2.77339e-16
SPTBN1-53576-AP	ENSG00000100320	0.469976	2.81908e-16
MAP2K7-47194-ES	ENSG00000113391	0.469926	2.83674e-16
TBC1D1-69017-ES	ENSG00000167281	0.46935	3.1452e-16
TACC1-83437-AP	ENSG00000112183	0.469166	3.24326e-16
MED11-38579-AA	ENSG00000119707	0.469039	3.30984e-16
RGL1-9194-AP	ENSG00000048740	-0.468996	3.32554e-16
AKAP10-39785-ES	ENSG00000129245	-0.467841	4.10005e-16
RAD54B-84556-AT	ENSG00000152601	0.467715	4.18315e-16
PLEKHM3-57206-AT	ENSG00000100320	-0.467525	4.31825e-16
APOLD1-20514-AP	ENSG00000100320	-0.467331	4.46099e-16
LRRFIP1-58133-ES	ENSG00000136450	-0.467284	4.48557e-16
ACPL2-67056-AP	ENSG00000153914	0.467102	4.62349e-16
ANGPT1-84859-AP	ENSG00000161547	0.466858	4.81955e-16
ZNF106-30163-AP	ENSG00000167281	0.466043	5.5763e-16
POLR2J3-81107-AT	ENSG00000121774	-0.465481	6.16003e-16
DACT3-50576-AT	ENSG00000135482	-0.465403	6.22965e-16
DNMBP-12781-AP	ENSG00000136450	-0.465311	6.31553e-16
LETMD1-21757-ES	ENSG00000153914	0.465215	6.40746e-16
CAMK2G-12249-ES	ENSG00000113391	0.465147	6.46836e-16
WNT2B-4198-AP	ENSG00000119707	0.465042	6.57328e-16
MLLT4-78456-ES	ENSG00000048740	0.464994	6.61027e-16
NFATC2-59798-AP	ENSG00000112183	0.464945	6.64993e-16
WNT2B-4198-AP	ENSG00000161547	0.464749	6.87089e-16
CDH23-12058-AT	ENSG00000161547	0.464284	7.45471e-16
LRRFIP1-58133-ES	ENSG00000113391	0.464271	7.45022e-16
LRRFIP1-58137-ES	ENSG00000011304	-0.464244	7.46455e-16
FAM72A-9577-AT	ENSG00000188529	-0.464167	7.54783e-16
PLEKHM3-57206-AT	ENSG00000048740	-0.463775	8.08061e-16
C1orf122-1840-RI	ENSG00000161547	0.463653	8.23662e-16
DAB2IP-87442-AP	ENSG00000113391	0.463579	8.32387e-16
CLSTN1-575-ES	ENSG00000113391	0.463299	8.7304e-16
WNT2B-4198-AP	ENSG00000188529	0.463092	9.03827e-16
CAB39L-25883-AP	ENSG00000048740	-0.463073	9.04223e-16
PTPRF-2189-ES	ENSG00000167281	0.463071	9.02021e-16
BCAM-50347-AT	ENSG00000136450	0.462887	9.29772e-16
PTPRF-2189-ES	ENSG00000136450	-0.462832	9.36496e-16
TPM1-30980-AP	ENSG00000152601	-0.462556	9.81493e-16
CAMK2G-12249-ES	ENSG00000167281	0.462369	1.01238e-15
DMD-88768-AP	ENSG00000113391	0.461912	1.09616e-15
DNMBP-12781-AP	ENSG00000135482	0.46186	1.1033e-15
NEK2-9718-AT	ENSG00000078328	0.461407	1.19358e-15
TPM1-31008-AA	ENSG00000135482	-0.460595	1.37699e-15
SNX11-42174-ES	ENSG00000129245	-0.460586	1.37532e-15
PCDH7-68993-AT	ENSG00000100320	-0.460485	1.39649e-15
COL18A1-60875-AP	ENSG00000011304	-0.46033	1.432e-15
TMEM189-59770-AP	ENSG00000104824	-0.460245	1.44991e-15
DNMBP-12781-AP	ENSG00000161547	-0.459926	1.53078e-15
PCDH7-68993-AT	ENSG00000048740	-0.459892	1.53587e-15
MICAL3-61016-ES	ENSG00000167281	0.459329	1.69376e-15
MARK3-29448-ES	ENSG00000167281	0.459287	1.702e-15
DENND1A-87517-ES	ENSG00000011304	-0.459197	1.72462e-15
IDUA-68439-AP	ENSG00000153914	0.459028	1.77284e-15
IL11RA-86209-AP	ENSG00000100320	-0.458966	1.7875e-15
DACT3-50576-AT	ENSG00000048740	-0.458864	1.81538e-15
PAAF1-17744-ES	ENSG00000152601	0.458846	1.81637e-15
SLC4A7-63783-ES	ENSG00000136450	-0.458678	1.86637e-15
LAS1L-89320-AD	ENSG00000111786	-0.458567	1.89859e-15
RAD54B-84556-AT	ENSG00000119707	-0.458348	1.96874e-15
MYO18A-40038-ES	ENSG00000152601	0.458282	1.98665e-15
DIXDC1-18708-AP	ENSG00000167281	-0.458159	2.02544e-15
SLC4A7-63783-ES	ENSG00000011304	-0.457999	2.07829e-15
CD99-98274-ES	ENSG00000167281	0.457675	2.19572e-15
C1orf122-1842-AD	ENSG00000161547	-0.457446	2.28063e-15
COL12A1-76773-ES	ENSG00000152601	-0.457414	2.28765e-15
SNX11-42174-ES	ENSG00000161547	0.457297	2.32926e-15
SVIL-11113-ES	ENSG00000113391	0.457259	2.33881e-15
SFMBT1-65289-AP	ENSG00000135482	0.457039	2.42581e-15
LAS1L-89321-ES	ENSG00000136450	-0.456552	2.63722e-15
VCL-12254-ES	ENSG00000100320	0.456483	2.66283e-15
TNS1-57434-ES	ENSG00000113391	0.45631	2.73827e-15
TGFBR3-3741-AP	ENSG00000129245	-0.456229	2.77066e-15
SEPT9-43715-AP	ENSG00000100320	0.455716	3.02519e-15
RAD54B-84556-AT	ENSG00000100320	0.455497	3.13655e-15
PQLC1-46257-ES	ENSG00000100320	0.455424	3.16901e-15
CLSTN1-575-ES	ENSG00000154548	0.4553	3.23031e-15
PAAF1-17744-ES	ENSG00000113391	0.4549	3.45745e-15
DTNA-45099-ES	ENSG00000048740	-0.454854	3.47664e-15
RGMB-72881-AP	ENSG00000167281	0.454719	3.55101e-15
NFYA-76094-ES	ENSG00000152601	0.45427	3.83293e-15
TNS1-57433-ES	ENSG00000136450	-0.454268	3.82447e-15
FAM72A-9575-AP	ENSG00000136450	-0.453964	4.02385e-15
MYO18A-40038-ES	ENSG00000154548	0.453286	4.52042e-15
DTNA-45099-ES	ENSG00000100320	-0.452934	4.79466e-15
SMIM7-48183-AT	ENSG00000135482	-0.452785	4.90953e-15
CAMK2G-12249-ES	ENSG00000136450	-0.45253	5.11979e-15
NSFL1C-58506-ES	ENSG00000113391	0.452297	5.31961e-15
NEK2-9718-AT	ENSG00000152601	0.452214	5.38304e-15
TMEM189-59770-AP	ENSG00000100320	0.45199	5.584e-15
TEAD1-14436-ES	ENSG00000136450	-0.45156	6.00357e-15
WIPI2-78656-ES	ENSG00000048740	-0.451398	6.16007e-15
SFMBT1-65289-AP	ENSG00000152601	0.451249	6.30545e-15
PCDH7-68993-AT	ENSG00000167281	-0.451213	6.32941e-15
CLSTN1-575-ES	ENSG00000135482	0.451152	6.38191e-15
COL12A1-76773-ES	ENSG00000136450	0.45034	7.32886e-15
PLEKHA1-13355-ES	ENSG00000113391	0.450287	7.3795e-15
CLSTN1-576-ES	ENSG00000135482	0.450207	7.46432e-15
TPM1-31008-AA	ENSG00000161547	0.450054	7.64547e-15
COL6A3-58104-ES	ENSG00000112183	-0.450017	7.67695e-15
TNS1-57434-ES	ENSG00000100320	0.449836	7.90186e-15
FBLN2-63511-ES	ENSG00000100320	0.449567	8.25755e-15
SSFA2-56438-AP	ENSG00000054118	-0.449438	8.42325e-15
DYSF-53935-AP	ENSG00000112183	-0.449264	8.66029e-15
ZNF483-87210-AT	ENSG00000100320	0.448368	1.00828e-14
AKAP10-39785-ES	ENSG00000153914	0.448186	1.03798e-14
LETMD1-21745-AD	ENSG00000121774	-0.447343	1.19687e-14
ATP2B4-9450-ES	ENSG00000011304	-0.447307	1.20136e-14
PCDH7-68993-AT	ENSG00000113391	-0.447298	1.20054e-14
SPTAN1-87772-ES	ENSG00000136450	-0.447206	1.21675e-14
NFYA-76094-ES	ENSG00000103067	-0.446937	1.27123e-14
PTPRF-2189-ES	ENSG00000135482	0.446429	1.38343e-14
LETMD1-21745-AD	ENSG00000126653	0.446376	1.3928e-14
ITGB4-43489-ES	ENSG00000113391	0.446211	1.42919e-14
PCYOX1-53879-AP	ENSG00000259956	-0.446045	1.46709e-14
MARK3-29448-ES	ENSG00000135482	0.445771	1.53377e-14
MTMR11-7413-AP	ENSG00000103067	0.445418	1.62505e-14
SMIM7-48183-AT	ENSG00000100320	-0.445326	1.64695e-14
RPS21-60075-AA	ENSG00000136450	0.445263	1.66086e-14
SMIM7-48183-AT	ENSG00000048740	-0.445112	1.70019e-14
UNG-24277-AP	ENSG00000113391	-0.444966	1.73921e-14
TTC7B-28826-ES	ENSG00000139793	0.444892	1.75725e-14
EPB41L2-77596-ES	ENSG00000113391	0.444677	1.81856e-14
ATP2B4-9450-ES	ENSG00000136450	-0.444584	1.84337e-14
MARK3-29450-ES	ENSG00000152601	0.444569	1.84384e-14
LRRC32-17898-AP	ENSG00000136450	0.444507	1.85887e-14
UNG-24277-AP	ENSG00000136450	0.444462	1.86914e-14
NFYA-76094-ES	ENSG00000136450	-0.444036	2.00465e-14
MTMR3-61690-ES	ENSG00000152601	0.443816	2.07652e-14
SVIL-11113-ES	ENSG00000100320	0.443741	2.09804e-14
DTNA-45099-ES	ENSG00000112183	-0.443611	2.14028e-14
LEPR-3295-AT	ENSG00000161547	-0.443576	2.14822e-14
LRRFIP1-58137-ES	ENSG00000167281	0.443525	2.16178e-14
EPB41L2-77596-ES	ENSG00000048740	0.44303	2.34552e-14
CDH23-12058-AT	ENSG00000188529	0.443005	2.35023e-14
SPAG9-42494-ES	ENSG00000167281	0.442873	2.398e-14
PSAP-12067-AA	ENSG00000100320	0.442773	2.43371e-14
TMEM151B-97224-AT	ENSG00000139767	0.442746	2.43928e-14
RBP7-592-ES	ENSG00000129245	-0.44227	2.63771e-14
AKAP10-39785-ES	ENSG00000161547	0.442013	2.74845e-14
ANGPT1-84859-AP	ENSG00000054118	-0.441353	3.06517e-14
TEAD1-14436-ES	ENSG00000167281	0.441274	3.09889e-14
PLEKHM3-57206-AT	ENSG00000152601	-0.441242	3.10911e-14
PLEKHM3-57206-AT	ENSG00000054118	-0.441206	3.12125e-14
CLSTN1-575-ES	ENSG00000167281	0.440824	3.32074e-14
MTMR11-7412-AP	ENSG00000103067	-0.440814	3.31939e-14
MAP2K7-47194-ES	ENSG00000152601	0.440774	3.33444e-14
EPB41L2-77596-ES	ENSG00000136450	-0.440681	3.37945e-14
CRAT-87828-ES	ENSG00000112183	0.440343	3.56925e-14
CLSTN1-576-ES	ENSG00000154548	0.440322	3.57411e-14
ZNF483-87210-AT	ENSG00000112183	0.44023	3.62142e-14
NDUFC1-70617-AP	ENSG00000100201	0.439563	4.04081e-14
TBC1D1-69017-ES	ENSG00000011304	-0.439291	4.2201e-14
MARK3-29448-ES	ENSG00000161547	-0.439232	4.25232e-14
RGMB-72881-AP	ENSG00000048740	0.438964	4.43748e-14
MLLT4-78456-ES	ENSG00000152601	0.438918	4.4626e-14
MARK3-29450-ES	ENSG00000167281	0.438842	4.50998e-14
ZNF106-30163-AP	ENSG00000111786	-0.438826	4.51249e-14
SNX11-42174-ES	ENSG00000104824	-0.438642	4.64293e-14
VCL-12254-ES	ENSG00000135829	-0.438459	4.77725e-14
INHBA-79310-AP	ENSG00000113391	0.438411	4.80545e-14
KIAA1217-10995-AP	ENSG00000154548	0.438345	4.84839e-14
RAD54B-84556-AT	ENSG00000163156	-0.438273	4.896e-14
SOGA2-44582-ES	ENSG00000113391	0.438207	4.93979e-14
HLF-42579-AP	ENSG00000167281	0.438109	5.01067e-14
SLC4A7-63783-ES	ENSG00000048740	0.437951	5.1337e-14
MLLT4-78456-ES	ENSG00000136450	-0.437829	5.22806e-14
FAM72A-9575-AP	ENSG00000135829	-0.437752	5.28455e-14
MLLT4-78456-ES	ENSG00000112183	0.437657	5.35723e-14
RUVBL2-50868-AD	ENSG00000129245	-0.437277	5.69464e-14
RGMB-72881-AP	ENSG00000100320	0.437194	5.7619e-14
COL12A1-76773-ES	ENSG00000167281	-0.436862	6.07588e-14
MYO18A-40038-ES	ENSG00000103067	-0.436766	6.16058e-14
C1orf122-1840-RI	ENSG00000188529	0.436748	6.16587e-14
SYNGR3-33182-AP	ENSG00000161547	0.436741	6.16074e-14
LRRFIP1-58137-ES	ENSG00000100320	0.43668	6.21017e-14
CRAT-87828-ES	ENSG00000113391	0.436486	6.40017e-14
MMP19-22274-RI	ENSG00000121774	-0.436262	6.62885e-14
NEK2-9718-AT	ENSG00000048740	0.435307	7.74551e-14
IL11RA-86209-AP	ENSG00000161547	0.435137	7.94953e-14
SEPT9-43715-AP	ENSG00000101489	0.434977	8.14646e-14
CD44-15143-ES	ENSG00000048740	-0.434862	8.28445e-14
PCYOX1-53879-AP	ENSG00000126653	0.434522	8.74405e-14
TPM1-30980-AP	ENSG00000135482	-0.434463	8.81243e-14
ATP2B4-9450-ES	ENSG00000113391	0.434432	8.83957e-14
POMGNT1-2783-AP	ENSG00000154548	0.434222	9.13142e-14
ACPL2-67056-AP	ENSG00000161547	0.434159	9.20743e-14
DNMT3A-52854-AP	ENSG00000135829	0.434064	9.33445e-14
CD99-98274-ES	ENSG00000113391	0.433935	9.51438e-14
SNX11-42174-ES	ENSG00000259956	-0.433846	9.63592e-14
PRDM10-19464-AP	ENSG00000119707	0.433797	9.6953e-14
AKT1-29559-AP	ENSG00000188529	0.433785	9.69396e-14
LAS1L-89320-AD	ENSG00000099783	-0.433785	9.67535e-14
APOLD1-20514-AP	ENSG00000161547	0.433697	9.7971e-14
ROGDI-33857-AD	ENSG00000153914	0.433445	1.01899e-13
SEPT9-43715-AP	ENSG00000161547	-0.433418	1.02153e-13
SVIL-11114-ES	ENSG00000136450	-0.433295	1.04036e-13
DAB2IP-87442-AP	ENSG00000136450	-0.433229	1.0496e-13
TACC1-83437-AP	ENSG00000136450	-0.433181	1.05576e-13
SSFA2-56438-AP	ENSG00000136450	0.43315	1.05907e-13
SPTBN1-53576-AP	ENSG00000188529	-0.433085	1.06836e-13
IDUA-68439-AP	ENSG00000188529	0.432601	1.15422e-13
SYNE2-27846-ES	ENSG00000154548	0.432211	1.22769e-13
PLCD1-64009-AP	ENSG00000112183	0.432063	1.2553e-13
NSFL1C-58506-ES	ENSG00000152601	0.431765	1.31528e-13
VCL-12254-ES	ENSG00000154548	0.431541	1.3616e-13
SMIM7-48183-AT	ENSG00000136450	0.431527	1.36213e-13
FLNA-90565-ES	ENSG00000136450	0.431503	1.36479e-13
CLSTN1-576-ES	ENSG00000103067	-0.431407	1.38352e-13
VCL-12254-ES	ENSG00000111786	-0.43139	1.38471e-13
LAS1L-89320-AD	ENSG00000100650	0.430948	1.48533e-13
SYNGR3-33182-AP	ENSG00000129245	-0.430851	1.50588e-13
TNS1-57433-ES	ENSG00000100320	0.430817	1.51154e-13
ARID5B-11866-AP	ENSG00000112183	-0.430526	1.58164e-13
PRDM10-19464-AP	ENSG00000153914	0.430493	1.58711e-13
CAMK2D-70416-ES	ENSG00000100320	0.430299	1.63472e-13
RAD54B-84556-AT	ENSG00000134453	-0.430197	1.65896e-13
SOGA2-44582-ES	ENSG00000136450	-0.430188	1.65835e-13
ROGDI-33857-AD	ENSG00000119707	0.430134	1.66956e-13
RBP7-592-ES	ENSG00000188529	0.430054	1.68836e-13
PSAP-12067-AA	ENSG00000154548	0.429999	1.70035e-13
LAS1L-89320-AD	ENSG00000205937	-0.429986	1.70064e-13
SPTBN1-53576-AP	ENSG00000161547	-0.429922	1.71524e-13
ZNF438-11135-ES	ENSG00000048740	0.429833	1.73678e-13
CLSTN1-575-ES	ENSG00000152601	0.429446	1.84588e-13
SVIL-11114-ES	ENSG00000100320	0.429357	1.86907e-13
ALDH6A1-28367-AP	ENSG00000259956	-0.429086	1.94923e-13
PSAP-12067-AA	ENSG00000112183	0.428906	2.00283e-13
PDLIM7-74784-ES	ENSG00000112183	-0.428762	2.04632e-13
ZNF160-51649-AP	ENSG00000104824	-0.428318	2.19425e-13
C1orf122-1842-AD	ENSG00000136450	-0.428199	2.23252e-13
DNMBP-12781-AP	ENSG00000188529	-0.428142	2.24907e-13
TACC1-83437-AP	ENSG00000048740	0.42805	2.2786e-13
MAP2K7-47194-ES	ENSG00000103067	-0.428028	2.28231e-13
LRRFIP1-58133-ES	ENSG00000154548	0.427875	2.33499e-13
ALDH6A1-28367-AP	ENSG00000153914	0.427825	2.34972e-13
ELK4-9560-AT	ENSG00000054118	-0.427743	2.37634e-13
NSFL1C-58506-ES	ENSG00000136450	-0.427736	2.37481e-13
MLTK-55999-AT	ENSG00000103067	0.427714	2.37915e-13
DENND1A-87517-ES	ENSG00000112183	0.42765	2.39935e-13
MMP19-22274-RI	ENSG00000104824	-0.427608	2.41117e-13
TNS1-57433-ES	ENSG00000113391	0.42739	2.49263e-13
SFMBT1-65289-AP	ENSG00000100320	0.427377	2.49332e-13
PCYOX1-53879-AP	ENSG00000104824	-0.427286	2.52573e-13
DMPK-50519-AP	ENSG00000100320	-0.427047	2.6199e-13
UNG-24277-AP	ENSG00000139793	-0.426733	2.75036e-13
PCYOX1-53879-AP	ENSG00000188529	0.426631	2.79063e-13
ELK4-9560-AT	ENSG00000152601	-0.426622	2.78958e-13
ADSSL1-29549-AP	ENSG00000153914	0.426326	2.91991e-13
ADSSL1-29549-AP	ENSG00000119707	0.426215	2.96683e-13
PCYOX1-53879-AP	ENSG00000182872	-0.426038	3.04659e-13
ALDH6A1-28367-AP	ENSG00000129245	-0.426006	3.05688e-13
TMEM184B-62226-ES	ENSG00000152601	0.425989	3.06012e-13
DMPK-50519-AP	ENSG00000136450	0.425814	3.14118e-13
PRKAR1B-78505-AP	ENSG00000113391	-0.425533	3.27992e-13
RBFOX2-61984-ES	ENSG00000113391	0.42541	3.33918e-13
ZC3H18-38002-ES	ENSG00000124193	0.425316	3.38363e-13
ZNF160-51649-AP	ENSG00000129245	-0.425292	3.39078e-13
EGFL7-88188-AP	ENSG00000152601	-0.425072	3.50552e-13
MLTK-55999-AT	ENSG00000112081	0.424983	3.54948e-13
POMGNT1-2783-AP	ENSG00000167281	0.424892	3.59491e-13
TGFBR3-3741-AP	ENSG00000054118	-0.424241	3.98063e-13
MICAL3-61016-ES	ENSG00000136450	-0.424136	4.04085e-13
MAFG-44239-AP	ENSG00000153914	0.424111	4.04948e-13
TMEM189-59770-AP	ENSG00000003756	0.424041	4.08794e-13
CLSTN1-576-ES	ENSG00000152601	0.423701	4.30742e-13
PQLC1-46257-ES	ENSG00000048740	0.423407	4.50554e-13
SOGA2-44582-ES	ENSG00000100320	0.423178	4.66415e-13
MLTK-55999-AT	ENSG00000100201	-0.422996	4.79202e-13
DMPK-50519-AP	ENSG00000048740	-0.422906	4.85289e-13
MYO18A-40038-ES	ENSG00000167281	0.422523	5.14718e-13
RPS6-214603-AD	ENSG00000150459	-0.4222	5.40736e-13
ADSSL1-29549-AP	ENSG00000129245	-0.422192	5.4046e-13
TTC7B-28826-ES	ENSG00000167281	0.421946	5.60909e-13
CHN1-56046-AP	ENSG00000136450	-0.421822	5.7109e-13
MLTK-55999-AT	ENSG00000167281	-0.42152	5.97886e-13
NFATC2-59798-AP	ENSG00000100320	0.421388	6.09383e-13
ANGPT1-84859-AP	ENSG00000113391	-0.421298	6.17085e-13
FBLN2-63511-ES	ENSG00000152601	0.421149	6.30641e-13
ASTN2-87367-AP	ENSG00000154548	0.420979	6.46674e-13
EPB41L1-59266-AP	ENSG00000135829	0.420957	6.47838e-13
CCL14-40367-AP	ENSG00000048740	0.420805	6.62407e-13
DMD-88768-AP	ENSG00000136450	-0.420728	6.69313e-13
POLR2J3-81107-AT	ENSG00000111786	-0.420411	7.02365e-13
ZNF438-11135-ES	ENSG00000167281	0.420129	7.32883e-13
CCL14-40366-AP	ENSG00000135829	0.419264	8.37772e-13
DMPK-50526-AA	ENSG00000112183	-0.419229	8.40989e-13
NEK2-9718-AT	ENSG00000139767	0.419156	8.49263e-13
TMEM184B-62226-ES	ENSG00000111786	-0.419017	8.66506e-13
PTPRF-2189-ES	ENSG00000152601	0.418949	8.74242e-13
SMAD6-31294-AP	ENSG00000188529	0.418916	8.77354e-13
SH3BP2-68594-AP	ENSG00000048740	-0.41889	8.7944e-13
WNT2B-4198-AP	ENSG00000100320	-0.418889	8.78181e-13
DOCK7-3256-ES	ENSG00000100320	0.418597	9.17611e-13
TPM1-30980-AP	ENSG00000113391	-0.418475	9.33781e-13
PDE8B-72564-AP	ENSG00000113391	0.418421	9.40073e-13
ZNF483-87210-AT	ENSG00000157540	0.418367	9.46489e-13
ALDH6A1-28367-AP	ENSG00000188529	0.418343	9.48512e-13
CD99-98274-ES	ENSG00000136450	-0.41821	9.66841e-13
SNX11-42174-ES	ENSG00000126653	0.417955	1.0044e-12
CXCL12-11342-AT	ENSG00000048740	-0.417747	1.03578e-12
ALDH6A1-28367-AP	ENSG00000182872	-0.417551	1.0661e-12
MTMR3-61690-ES	ENSG00000136450	-0.417522	1.06908e-12
CCL14-40366-AP	ENSG00000048740	-0.417386	1.09023e-12
ALDH6A1-28367-AP	ENSG00000011304	-0.417341	1.09607e-12
ZNF438-11135-ES	ENSG00000112183	0.417227	1.11393e-12
FAM72A-9577-AT	ENSG00000161547	-0.41707	1.13957e-12
CCL14-40367-AP	ENSG00000112183	0.417055	1.14038e-12
SPAG9-42494-ES	ENSG00000135482	0.417028	1.14329e-12
CTNND1-15945-ES	ENSG00000112183	0.416973	1.15134e-12
CLSTN1-575-ES	ENSG00000188529	-0.41685	1.17163e-12
MICAL3-61016-ES	ENSG00000011304	-0.41684	1.17148e-12
FBXL20-40638-AP	ENSG00000112183	-0.416806	1.1759e-12
SEPT9-43715-AP	ENSG00000103067	-0.416625	1.20741e-12
SPAG9-42494-ES	ENSG00000154548	0.4166	1.21027e-12
PIWIL4-18358-AP	ENSG00000129245	-0.416534	1.22071e-12
LRRFIP1-58133-ES	ENSG00000135482	0.416495	1.22612e-12
COL6A3-58104-ES	ENSG00000152601	-0.416491	1.22501e-12
ITGB4-43489-ES	ENSG00000100320	0.416296	1.26057e-12
SVIL-11113-ES	ENSG00000136450	-0.416229	1.27175e-12
MARK3-29450-ES	ENSG00000136450	-0.416222	1.27103e-12
EPB41L1-59266-AP	ENSG00000136450	0.416133	1.28662e-12
AKT1-29559-AP	ENSG00000124193	0.416003	1.31085e-12
ZFYVE28-68557-AP	ENSG00000154548	0.415598	1.39325e-12
TBC1D1-69017-ES	ENSG00000154548	0.415594	1.39202e-12
SFMBT1-65289-AP	ENSG00000188529	-0.415331	1.44742e-12
GCHFR-30031-AP	ENSG00000104824	-0.415298	1.45257e-12
PLEKHA1-13355-ES	ENSG00000135482	0.415225	1.46681e-12
MICAL3-61016-ES	ENSG00000048740	0.415196	1.47103e-12
CLIP3-49330-AP	ENSG00000048740	-0.41501	1.51157e-12
C1orf122-1842-AD	ENSG00000135482	0.415	1.5114e-12
SLC4A2-82328-AP	ENSG00000124193	0.4149	1.53254e-12
ZNF483-87210-AT	ENSG00000136450	-0.414851	1.54173e-12
SPAG9-42494-ES	ENSG00000103067	-0.414755	1.56237e-12
EPB41L1-59266-AP	ENSG00000188529	0.414747	1.56179e-12
PCYOX1-53879-AP	ENSG00000054118	-0.414641	1.5851e-12
ZNF438-11135-ES	ENSG00000115875	-0.414425	1.6363e-12
DYSF-53935-AP	ENSG00000167281	-0.41435	1.65273e-12
TNC-87357-ES	ENSG00000167281	-0.414337	1.65349e-12
POMGNT1-2783-AP	ENSG00000111786	-0.414258	1.67122e-12
LAS1L-89320-AD	ENSG00000113391	0.413662	1.8288e-12
BCAS3-42864-AP	ENSG00000054118	0.413638	1.83267e-12
DACT3-50576-AT	ENSG00000136450	0.41363	1.83196e-12
CCL14-40366-AP	ENSG00000112183	-0.41343	1.88639e-12
ITGB4-43489-ES	ENSG00000167281	0.413222	1.94462e-12
NSFL1C-58506-ES	ENSG00000167281	0.41314	1.96621e-12
ZNF438-11135-ES	ENSG00000113391	0.413126	1.96733e-12
RGMB-72881-AP	ENSG00000113391	0.412985	2.00726e-12
CCL14-40367-AP	ENSG00000135829	-0.412972	2.00836e-12
VCL-12254-ES	ENSG00000152601	0.412677	2.098e-12
RBFOX2-61984-ES	ENSG00000167281	0.412621	2.11276e-12
PAAF1-17744-ES	ENSG00000011304	-0.412045	2.30375e-12
FAM72A-9577-AT	ENSG00000048740	0.412013	2.31148e-12
DIXDC1-18708-AP	ENSG00000135829	0.412004	2.31135e-12
DYSF-53937-ES	ENSG00000167281	0.411814	2.37578e-12
ARID5B-11866-AP	ENSG00000113391	-0.411752	2.39467e-12
DENND1A-87517-ES	ENSG00000167281	0.41174	2.39542e-12
CLSTN1-575-ES	ENSG00000103067	-0.411417	2.51263e-12
EPB41L2-77596-ES	ENSG00000147274	-0.411321	2.54594e-12
ITGB4-43489-ES	ENSG00000011304	-0.41128	2.55806e-12
HDAC9-78886-AP	ENSG00000048740	-0.411124	2.61586e-12
CAMK2D-70416-ES	ENSG00000113391	0.411118	2.6144e-12
ZNF483-87210-AT	ENSG00000147274	-0.410754	2.75931e-12
ANK3-11843-AP	ENSG00000112183	0.41074	2.76108e-12
SVIL-11113-ES	ENSG00000152601	0.41063	2.80316e-12
MTMR3-61690-ES	ENSG00000161547	-0.41043	2.88539e-12
TACC1-83437-AP	ENSG00000113391	0.410358	2.91319e-12
RPL18A-48384-ES	ENSG00000152601	-0.410263	2.95098e-12
SHANK2-17406-AP	ENSG00000103067	-0.410014	3.06021e-12
MARK3-29448-ES	ENSG00000103067	-0.409923	3.09801e-12
CAMK2G-12247-ES	ENSG00000112183	0.409874	3.11689e-12
SHANK2-17406-AP	ENSG00000167281	0.409158	3.4684e-12
NEK2-9718-AT	ENSG00000112081	-0.408886	3.60893e-12
DMD-88772-ES	ENSG00000139793	0.408837	3.6305e-12
UNG-24277-AP	ENSG00000112081	0.40856	3.78039e-12
SLC4A7-63783-ES	ENSG00000113391	0.408449	3.83839e-12
SNX11-42174-ES	ENSG00000054118	-0.408447	3.83419e-12
ZNF483-87210-AT	ENSG00000152601	0.40835	3.8847e-12
PSAP-12067-AA	ENSG00000011304	-0.408319	3.89739e-12
MICAL3-61016-ES	ENSG00000113391	0.40826	3.92643e-12
SNX11-42174-ES	ENSG00000182872	-0.407636	4.30727e-12
MLTK-55999-AT	ENSG00000139793	-0.407579	4.33865e-12
CHN2-79081-AP	ENSG00000112183	0.407505	4.38089e-12
CCL14-40367-AP	ENSG00000113391	0.407429	4.42487e-12
COL18A1-60875-AP	ENSG00000113391	0.407383	4.44871e-12
SPTAN1-87772-ES	ENSG00000113391	0.407374	4.44854e-12
DAB2IP-87442-AP	ENSG00000161547	-0.40726	4.51903e-12
CRAT-87828-ES	ENSG00000100320	0.407237	4.52845e-12
LAS1L-89320-AD	ENSG00000102103	-0.407222	4.5322e-12
DMPK-50526-AA	ENSG00000100320	-0.407191	4.54691e-12
CLIP3-49330-AP	ENSG00000112183	-0.407054	4.63497e-12
APOLD1-20514-AP	ENSG00000048740	-0.40702	4.65211e-12
HDAC9-78885-AP	ENSG00000113391	0.406851	4.76487e-12
IL11RA-86209-AP	ENSG00000188529	0.40675	4.83074e-12
MICAL3-96068-ES	ENSG00000048740	0.406739	4.83176e-12
FBXL20-40638-AP	ENSG00000136450	0.406679	4.86879e-12
CHN2-79081-AP	ENSG00000167281	0.406508	4.98809e-12
DMD-88768-AP	ENSG00000111786	-0.406452	5.0233e-12
MICAL3-96068-ES	ENSG00000136450	-0.406278	5.14835e-12
ACPL2-67056-AP	ENSG00000129245	-0.406141	5.24772e-12
ALDH6A1-28367-AP	ENSG00000126653	0.406019	5.33723e-12
SFMBT1-65289-AP	ENSG00000119707	-0.405706	5.58531e-12
UNG-24277-AP	ENSG00000048740	-0.405544	5.7139e-12
PDE8B-72564-AP	ENSG00000129245	0.405406	5.82489e-12
MARK3-29448-ES	ENSG00000139793	0.405405	5.81763e-12
ELK4-9560-AT	ENSG00000084093	-0.405396	5.81782e-12
LRRFIP1-58137-ES	ENSG00000099783	-0.405367	5.83435e-12
TMEM184B-62226-ES	ENSG00000161547	-0.405096	6.06689e-12
C1orf122-1842-AD	ENSG00000112183	0.405084	6.06931e-12
SFMBT1-65289-AP	ENSG00000112081	-0.404947	6.18673e-12
TPM1-30980-AP	ENSG00000136450	0.404933	6.19104e-12
FBLN2-63511-ES	ENSG00000161547	-0.404771	6.33374e-12
COL6A3-58104-ES	ENSG00000161547	0.404704	6.3878e-12
SYNGR3-33182-AP	ENSG00000188529	0.404471	6.60466e-12
SIRT2-49713-AA	ENSG00000161547	0.404463	6.60307e-12
TPM1-31008-AA	ENSG00000100320	-0.40437	6.6866e-12
SIRT2-49713-AA	ENSG00000119707	0.403736	7.33718e-12
MTMR11-7412-AP	ENSG00000154548	0.403641	7.43155e-12
MTMR3-61690-ES	ENSG00000113391	0.403431	7.65607e-12
WIPI2-78656-ES	ENSG00000113391	-0.403424	7.65407e-12
LRRFIP1-58133-ES	ENSG00000111786	-0.403327	7.75404e-12
SSFA2-56438-AP	ENSG00000100320	-0.403276	7.80261e-12
PLEKHA1-13355-ES	ENSG00000103067	-0.403255	7.81594e-12
PAAF1-17744-ES	ENSG00000154548	0.403244	7.81813e-12
MAP2K7-47194-ES	ENSG00000139793	0.40318	7.88186e-12
TPM1-31008-AA	ENSG00000048740	-0.40312	7.94165e-12
TACC1-83437-AP	ENSG00000135829	-0.403078	7.98016e-12
FBLN2-63511-ES	ENSG00000167281	0.403039	8.01632e-12
SVIL-11114-ES	ENSG00000011304	-0.402793	8.30228e-12
DMD-88768-AP	ENSG00000147274	-0.402777	8.31088e-12
TNS1-57433-ES	ENSG00000152601	0.402588	8.5346e-12
MARK3-29448-ES	ENSG00000115875	-0.402558	8.56189e-12
SOGA2-44582-ES	ENSG00000011304	-0.402523	8.59391e-12
LEPR-3295-AT	ENSG00000115875	-0.4025	8.61263e-12
CAMK2G-12247-ES	ENSG00000048740	0.402225	8.95759e-12
SEPT9-43715-AP	ENSG00000167281	0.402161	9.03123e-12
SPOP-42303-AP	ENSG00000048740	0.402035	9.1881e-12
FLNA-90565-ES	ENSG00000135829	0.402034	9.17758e-12
VCL-12254-ES	ENSG00000147274	-0.401894	9.35613e-12
MARK3-29448-ES	ENSG00000112081	-0.401797	9.47947e-12
CDYL-75229-AP	ENSG00000188529	0.40176	9.51832e-12
MTMR11-7413-AP	ENSG00000154548	-0.401727	9.55205e-12
CAMK2G-12247-ES	ENSG00000100320	0.401665	9.62679e-12
CHN2-79081-AP	ENSG00000113391	0.401646	9.64192e-12
UNG-24277-AP	ENSG00000152601	-0.401465	9.8884e-12
SPTBN1-53576-AP	ENSG00000167281	0.401387	9.99081e-12
DENND1A-87517-ES	ENSG00000103067	-0.401058	1.04725e-11
SYNE2-27846-ES	ENSG00000136450	-0.40086	1.07679e-11
TNS1-57434-ES	ENSG00000135829	-0.400659	1.10765e-11
FAM72A-9577-AT	ENSG00000112081	-0.400632	1.11056e-11
DTNA-45099-ES	ENSG00000167281	-0.400586	1.11672e-11
CHN2-79081-AP	ENSG00000048740	0.400177	1.18422e-11
PAAF1-17744-ES	ENSG00000167281	0.400052	1.20461e-11
