# Supplementary material for: The landscape of alternative splicing reveals novel events associated with tumorigenesis and the immune microenvironment in gastric cancer
Source: Aging (Albany NY). 2021 Jan 10;13(3):4317–34. doi: 10.18632/aging.202393 (PMC7906195; doi:10.18632/aging.202393)
Supplement: Supplementary Table 11 [file aging-13-202393-s012.xlsx]

## Sheet: Sheet1
Table S11. Kruskal-Wallis test of GSVA scores among three clusters
Pathway	Adjusted P-value
ADIPOGENESIS	0.259287
ALLOGRAFT REJECTION	8.86956e-08
ANDROGEN RESPONSE	0.0978667
ANGIOGENESIS	2.74288e-19
APICAL JUNCTION	4.46828e-24
APICAL SURFACE	8.95493e-10
APOPTOSIS	5.59172e-21
BILE ACID METABOLISM	2.25057e-07
CHOLESTEROL HOMEOSTASIS	0.000142087
COAGULATION	0.457001
COMPLEMENT	4.6362e-14
DNA REPAIR	1.50093e-14
E2F TARGETS	4.93973e-21
EPITHELIAL MESENCHYMAL TRANSITION	1.27548e-27
ESTROGEN RESPONSE EARLY	0.000473566
ESTROGEN RESPONSE LATE	0.162794
FATTY ACID METABOLISM	0.00276012
G2M CHECKPOINT	4.65092e-16
GLYCOLYSIS	4.0752e-15
HEDGEHOG SIGNALING	1.07542e-17
HEME METABOLISM	2.45241e-05
HYPOXIA	5.12422e-18
IL2 STAT5 SIGNALING	4.52141e-17
IL6 JAK STAT3 SIGNALING	3.08173e-19
INFLAMMATORY RESPONSE	3.14116e-20
INTERFERON ALPHA RESPONSE	0.00398093
INTERFERON GAMMA RESPONSE	6.24857e-06
KRAS SIGNALING DN	1.91641e-10
KRAS SIGNALING UP	1.50093e-14
MITOTIC SPINDLE	0.0445061
MTORC1 SIGNALING	6.83547e-19
MYC TARGETS V1	2.20639e-17
MYC TARGETS V2	1.5732e-15
MYOGENESIS	3.38979e-27
NOTCH SIGNALING	1.38614e-16
OXIDATIVE PHOSPHORYLATION	5.9987e-08
P53 PATHWAY	4.51484e-08
PANCREAS BETA CELLS	3.4316e-08
PEROXISOME	0.00192502
PI3K AKT MTOR SIGNALING	0.034058
PROTEIN SECRETION	1.82411e-06
REACTIVE OXYGEN SPECIES PATHWAY	1.08047e-07
SPERMATOGENESIS	0.000298097
TGF BETA SIGNALING	2.91788e-05
TNFA SIGNALING VIA NFKB	4.35217e-07
UNFOLDED PROTEIN RESPONSE	1.5732e-15
UV RESPONSE DN	1.77504e-20
UV RESPONSE UP	6.65433e-08
WNT BETA CATENIN SIGNALING	0.03186
XENOBIOTIC METABOLISM	1.24371e-05
