# Supplementary material for: The landscape of alternative splicing reveals novel events associated with tumorigenesis and the immune microenvironment in gastric cancer
Source: Aging (Albany NY). 2021 Jan 10;13(3):4317–34. doi: 10.18632/aging.202393 (PMC7906195; doi:10.18632/aging.202393)
Supplement: Supplementary Table 12 [file aging-13-202393-s013.xlsx]

## Sheet: Sheet1
Table S12. Clinical and immune features among the 3 DEAS-BASED clusters
Terms		C1	C2	C3	P value for all 3 clusters
sample		154	100	51
TIDE (%)	FALSE	76 (49.4)	73 (73.0)	44 (86.3)	<0.001
	TRUE	78 (50.6)	27 (27.0)	7 (13.7)
T_stage (%)	T1	13 ( 8.4)	2 ( 2.0)	0 ( 0.0)	0.015
	T2	27 (17.5)	29 (29.0)	10 (19.6)
	T3	81 (52.6)	40 (40.0)	27 (52.9)
	T4	33 (21.4)	29 (29.0)	14 (27.5)
N_stage (%)	N0	50 (32.5)	24 (24.0)	17 (33.3)	0.827
	N1	41 (26.6)	32 (32.0)	13 (25.5)
	N2	33 (21.4)	19 (19.0)	10 (19.6)
	N3	27 (17.5)	24 (24.0)	10 (19.6)
	NX	3 ( 1.9)	1 ( 1.0)	1 ( 2.0)
M_stage (%)	M0	139 (90.3)	90 (90.0)	48 (94.1)	0.81
	M1	10 ( 6.5)	5 ( 5.0)	2 ( 3.9)
	MX	5 ( 3.2)	5 ( 5.0)	1 ( 2.0)
TNM_stage (%)	Stage I	27 (17.5)	12 (12.0)	4 ( 7.8)	0.247
	Stage II	48 (31.2)	31 (31.0)	23 (45.1)
	Stage III	63 (40.9)	47 (47.0)	22 (43.1)
	Stage IV	16 (10.4)	10 (10.0)	2 ( 3.9)
Histologic_grade (%)	G1	4 ( 2.6)	2 ( 2.0)	0 ( 0.0)	<0.001
	G2	70 (45.5)	36 (36.0)	4 ( 7.8)
	G3	76 (49.4)	62 (62.0)	44 (86.3)
	GX	4 ( 2.6)	0 ( 0.0)	3 ( 5.9)
Microsatellite_statue (%)	MSI-H	32 (20.8)	20 (20.0)	1 ( 2.0)	0.002
	MSI-L	24 (15.6)	17 (17.0)	3 ( 5.9)
	MSS	98 (63.6)	63 (63.0)	47 (92.2)
Immune_score (mean (SD))		212.47 (742.04)	933.85 (876.16)	907.90 (711.34)	<0.001
Stromal_score (mean (SD))		-590.00 (612.16)	319.39 (620.35)	1028.94 (526.17)	<0.001
B cell naive (mean (SD))		0.04 (0.05)	0.03 (0.03)	0.04 (0.05)	0.579
B cell memory (mean (SD))		0.02 (0.03)	0.03 (0.07)	0.05 (0.07)	<0.001
B cell plasma (mean (SD))		0.04 (0.05)	0.03 (0.05)	0.02 (0.03)	0.057
T cell CD8+ (mean (SD))		0.11 (0.08)	0.11 (0.08)	0.13 (0.06)	0.155
T cell CD4+ naive (mean (SD))		0.00 (0.00)	0.00 (0.01)	0.00 (0.00)	0.359
T cell CD4+ memory resting (mean (SD))		0.17 (0.09)	0.14 (0.07)	0.18 (0.05)	0.005
T cell CD4+ memory activated (mean (SD))		0.02 (0.04)	0.02 (0.04)	0.00 (0.00)	<0.001
T cell follicular helper (mean (SD))		0.06 (0.04)	0.05 (0.03)	0.03 (0.02)	<0.001
T cell regulatory (Tregs) (mean (SD))		0.05 (0.03)	0.04 (0.03)	0.04 (0.03)	0.725
T cell gamma delta (mean (SD))		0.00 (0.01)	0.00 (0.01)	0.00 (0.00)	0.718
NK cell resting (mean (SD))		0.01 (0.02)	0.01 (0.02)	0.00 (0.01)	0.001
NK cell activated (mean (SD))		0.04 (0.04)	0.03 (0.03)	0.05 (0.03)	0.003
Monocyte (mean (SD))		0.01 (0.01)	0.02 (0.02)	0.02 (0.02)	<0.001
Macrophage M0 (mean (SD))		0.08 (0.09)	0.10 (0.09)	0.05 (0.08)	<0.001
Macrophage M1 (mean (SD))		0.06 (0.04)	0.07 (0.04)	0.05 (0.04)	0.004
Macrophage M2 (mean (SD))		0.18 (0.10)	0.21 (0.09)	0.23 (0.08)	<0.001
Myeloid dendritic cell resting (mean (SD))		0.00 (0.01)	0.01 (0.01)	0.01 (0.01)	0.277
Myeloid dendritic cell activated (mean (SD))		0.01 (0.02)	0.01 (0.02)	0.01 (0.02)	0.018
Mast cell activated (mean (SD))		0.01 (0.03)	0.01 (0.02)	0.06 (0.05)	<0.001
Mast cell resting (mean (SD))		0.07 (0.07)	0.06 (0.08)	0.03 (0.06)	<0.001
Eosinophil (mean (SD))		0.00 (0.00)	0.00 (0.00)	0.00 (0.00)	0.998
Neutrophil (mean (SD))		0.01 (0.02)	0.02 (0.03)	0.01 (0.02)	0.002
